# Supplementary material for: Deglacial carbon cycle changes observed in a compilation of 117 benthic δ 13 C time series (20–6 ka)
Source: Copernicus journal article supplement (doi:10.5194/cp-2018-25), 2018-03-15
Supplement: Supplementary file 1 [file cp-2018-25-supplement.zip]

## Appendix A

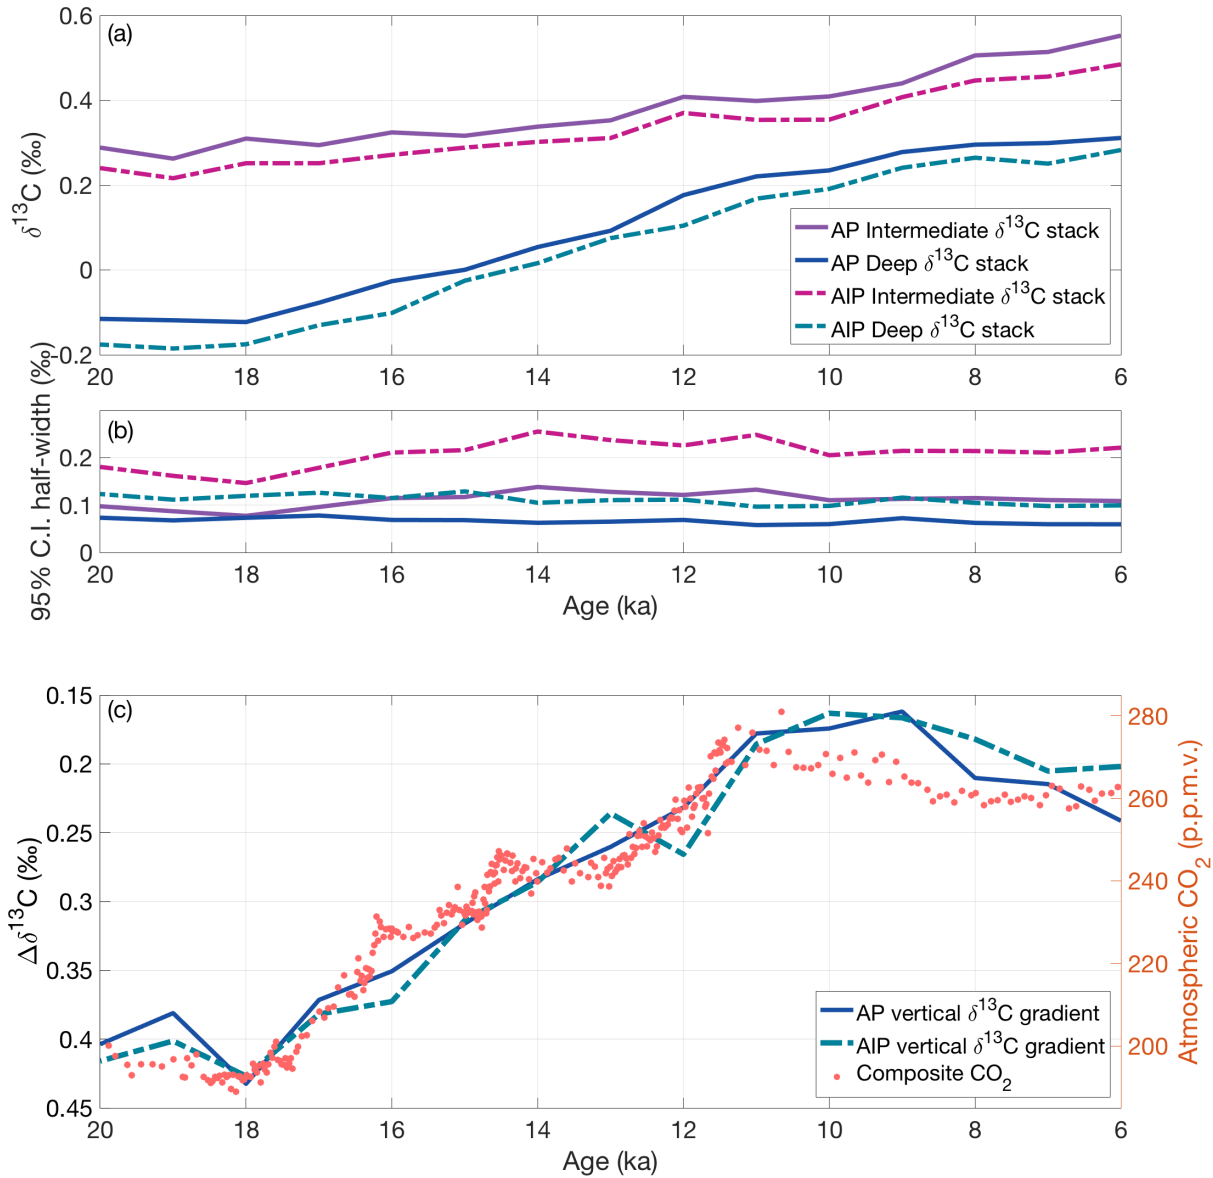

**Figure A1.** (A) Two versions of the deep and intermediate stacks with the AIP stacks plotted in dot-dashed lines, and AP stacks plotted in solid lines. (B) The 95% C.I. half-width for each stack in the legend in figure (A). (C) Comparison of CO<sub>2</sub> and both AP and AIP vertical  $\delta^{13}\text{C}$  gradients. Both volume-weighted vertical gradients closely resemble the spliced atmospheric CO<sub>2</sub> records (red circles) (Marcott et al., 2014; Monnin et al., 2004), but the AIP  $\delta^{13}\text{C}$  gradient (dashed green-blue line) is more noisy and slightly more depleted than the AP  $\delta^{13}\text{C}$  gradient (solid blue line).

**Table A1.** Supplemental table of the name, location, region, and reference for each record in this compilation

| Core Name   | Lat  | Lon   | Depth (m) | Region | Reference                        |
|-------------|------|-------|-----------|--------|----------------------------------|
| EW9209-1JPC | 5.9  | -44.2 | 4056      | LDNA   | Curry and Oppo (1997)            |
| GeoB7920-2  | 20.8 | -18.6 | 2278      | UDNA   | Tjallingii et al. (2008)         |
| GeoB9508-5  | 14.5 | -17.9 | 2384      | UDNA   | Mulitza et al. (2008)            |
| GeoB9526    | 12.4 | -18.1 | 3223      | UDNA   | Zarriess and Mackensen (2011)    |
| GIK17049-6  | 55.3 | -26.7 | 3331      | UDNA   | Jung and Sarnthein (2003)        |
| GIK17051    | 56.2 | -31.9 | 2295      | UDNA   | Sarnthein et al. (1994)          |
| GIK23415-9  | 53.2 | -19.2 | 2472      | UDNA   | Weinelt et al. (2003)            |
| KF13        | 37.6 | -31.8 | 2690      | UDNA   | Richter (1998)                   |
| MD95-2040   | 40.6 | -9.9  | 2465      | UDNA   | Voelker and de Abreu (2011)      |
| MD99-2334   | 37.8 | -10.2 | 3146      | UDNA   | Skinner and Shackleton (2004)    |
| NA87-22     | 55.5 | -14.7 | 2161      | UDNA   | Duplessy et al. (1992)           |
| ODP658C     | 20.8 | -18.6 | 2274      | UDNA   | Woodruff and Chambers (1991)     |
| ODP980      | 55.5 | -14.7 | 2168      | UDNA   | Oppo et al. (2006)               |
| SU90-03     | 40.1 | -32   | 2475      | UDNA   | Cortijo et al. (1999)            |
| V29-202     | 61   | -21   | 2658      | UDNA   | Oppo and Lehman (1995)           |
| ENO66-16    | 5.5  | -21.1 | 3152      | UDNA   | Oppo and Fairbanks (1987)        |
| ENO66-21    | 4.2  | -21.6 | 3995      | UDNA   | Oppo and Fairbanks (1987)        |
| ENO66-26    | 3.1  | -20   | 4745      | LDNA   | Oppo and Fairbanks (1987)        |
| ENO66-32    | 2.5  | -19.7 | 4998      | LDNA   | Oppo and Fairbanks (1987)        |
| ENO66-36    | 4.3  | -20.2 | 4095      | LDNA   | Oppo and Fairbanks (1987)        |
| ENO66-38    | 4.9  | -20.5 | 2931      | UDNA   | Oppo and Fairbanks (1987)        |
| ENO66-44    | 5.3  | -21.7 | 3428      | UDNA   | Oppo and Fairbanks (1987)        |
| GeoB1101    | 1.7  | -10.9 | 4588      | LDNA   | Bickert and Wefer (1996)         |
| GeoB4216    | 30.6 | -12.4 | 2324      | UDNA   | Freudenthal et al. (2002)        |
| GIK12328-5  | 21.2 | -18.6 | 2778      | UDNA   | Sarnthein et al. (1994)          |
| GIK12347-2  | 15.8 | -17.9 | 2576      | UDNA   | Sarnthein et al. (1994)          |
| GIK12379-3  | 23.1 | -17.8 | 2136      | UDNA   | Sarnthein et al. (1994)          |
| GIK12392-1  | 25.2 | -16.9 | 2573      | UDNA   | Sarnthein et al. (1994)          |
| GIK15612-2  | 44.4 | -26.5 | 3050      | UDNA   | Sarnthein et al. (1994)          |
| GIK15669    | 34.9 | -7.8  | 2022      | UDNA   | Sarnthein et al. (1994)          |
| GIK15672    | 34.9 | -8.1  | 2460      | UDNA   | Sarnthein et al. (1994)          |
| GIK16402    | 14.4 | -20.5 | 4202      | LDNA   | Sarnthein et al. (1994)          |
| GIK17055-1  | 48.2 | -27.1 | 2558      | UDNA   | Sarnthein et al. (1994)          |
| GIK23414-9  | 53.5 | -20.3 | 2196      | UDNA   | Sarnthein et al. (1994)          |
| GIK23416-4  | 51.6 | -20   | 3616      | UDNA   | Jung and Sarnthein et al. (1994) |
| GIK23417-1  | 50.7 | -19.4 | 3850      | UDNA   | Jung and Sarnthein (2004)        |

| Core Name  | Lat   | Lon   | Depth (m) | Region | Reference                           |
|------------|-------|-------|-----------|--------|-------------------------------------|
| GIK23418-8 | 52.6  | -20.3 | 2841      | UDNA   | Jung and Sarnthein (2004)           |
| IODP-U1308 | 49.9  | -24.2 | 3900      | UDNA   | Hodell et al. (2008)                |
| KNR110-50  | 4.9   | -43.2 | 3995      | UDNA   | Curry et al. (1988)                 |
| KNR110-55  | 4.9   | -42.9 | 4556      | LDNA   | Curry et al. (1988)                 |
| KNR110-58  | 4.8   | -43   | 4341      | LDNA   | Curry et al. (1988)                 |
| KNR110-66  | 4.6   | -43.4 | 3547      | UDNA   | Curry et al. (1988)                 |
| KNR110-71  | 4.4   | -43.7 | 3164      | UDNA   | Curry et al. (1988)                 |
| KNR110-75  | 4.3   | -43.4 | 3063      | UDNA   | Curry et al. (1988)                 |
| KNR110-82  | 4.3   | -43.5 | 2816      | UDNA   | Curry et al. (1988)                 |
| KNR110-91  | 4.8   | -43.3 | 3810      | UDNA   | Curry et al. (1988)                 |
| MD95-2039  | 40.6  | -10.4 | 3381      | UDNA   | Schönfeld et al. (2003)             |
| ODP928     | 5.5   | -43.8 | 4012      | LDNA   | Curry and Oppo (2005)               |
| SU90-39    | 52.5  | -22   | 3955      | UDNA   | Chapman and Shackleton (1998)       |
| V22-197    | 14.2  | -18.6 | 3167      | UDNA   | Boyle (1992)                        |
| V23-81     | 54.3  | -16.8 | 2393      | UDNA   | Veum et al. (1992)                  |
| V25-59     | 1.4   | -33.5 | 3824      | UDNA   | Bertram et al. (1995)               |
| V30-49     | 18.4  | -21.1 | 3093      | UDNA   | Boyle (1992); Martin and Lea (1998) |
| CH73-139   | 54.7  | -16.4 | 2209      | UDNA   | Bickert and Mackensen (2003)        |
| CHN82-24   | 43.5  | -30.7 | 3070      | UDNA   | Boyle and Keigwin (1985)            |
| GIK13521   | 3     | -22   | 4504      | LDNA   | Sarnthein et al. (1994)             |
| GIK16415   | 9.6   | -19.1 | 3841      | UDNA   | Sarnthein et al. (1994)             |
| GIK17050   | 55.5  | -27.9 | 2795      | UDNA   | Sarnthein et al. (1994)             |
| HM52-43    | 63.5  | -0.7  | 2781      | UDNA   | Veum et al. (1992)                  |
| GeoB1041   | -3.5  | -7.6  | 4033      | DSA    | Mackensen and Bickert (1999)        |
| GeoB1112   | -5.8  | -10.8 | 3125      | DSA    | Mackensen and Bickert (1999)        |
| GeoB1117   | -3.8  | -14.9 | 3984      | DSA    | Mackensen and Bickert (1999)        |
| GeoB1118   | -3.6  | -16.4 | 4675      | DSA    | Mackensen and Bickert (1999)        |
| GeoB1211   | -24.5 | 7.5   | 4089      | DSA    | Bickert and Wefer (1999)            |
| GeoB1214   | -24.7 | 7.2   | 3210      | DSA    | Bickert and Wefer (1999)            |
| GeoB1710   | -23.4 | 11.7  | 2987      | DSA    | Schmiedl and Mackensen (1997)       |
| MD07-3076  | -44.2 | -14.2 | 3770      | DSA    | Skinner et al. (2010)               |
| ODP1089    | -40.9 | 9.9   | 4621      | DSA    | Hodell et al. (2001)                |
| ODP1090    | -42.9 | 8.9   | 3702      | DSA    | Venz and Hodell (2002)              |
| PS2498     | -44.2 | -14.2 | 3783      | DSA    | Hodell et al. (2003)                |
| RC13-228   | -22.3 | 11.2  | 3204      | DSA    | Boyle (1992)                        |
| V29-135    | -19.7 | 8.88  | 2675      | DSA    | Sarnthein et al. (1994)             |
| V30-40     | 0.2   | -23.2 | 3706      | DSA    | Oppo and Fairbanks (1987)           |

| Core Name     | Lat   | Lon    | Depth (m) | Region | Reference                                    |
|---------------|-------|--------|-----------|--------|----------------------------------------------|
| DSDP502       | 11.5  | -79.4  | 1800      | INA    | Demenocal et al. (1992)                      |
| GeoB6718      | 52.2  | -12.8  | 900       | INA    | Rüggeberg et al. (2005)                      |
| GIK15666-6    | 34.9  | -7.1   | 803       | INA    | Sarnthein et al. (1994)                      |
| GIK16006-1    | 29.3  | -11.5  | 796       | INA    | Sarnthein et al. (1994)                      |
| GIK16017      | 21.3  | -17.8  | 812       | INA    | Sarnthein et al. (1994)                      |
| OCE205-103GGC | 26.1  | -78.1  | 965       | INA    | Slowey and Curry (1995)                      |
| GeoB4240      | 28.9  | -13.2  | 1358      | INA    | Freudenthal et al. (2002)                    |
| GIK11944-2    | 35.6  | -8.1   | 1765      | INA    | Weinelt and Sarnthein (2003)                 |
| GIK16004      | 29.9  | -10.7  | 1512      | INA    | Sarnthein et al. (1994)                      |
| GIK16030      | 21.2  | -18.1  | 1500      | INA    | Sarnthein et al. (1994)                      |
| GIK23419      | 54.9  | -19.8  | 1491      | INA    | Sarnthein et al. (1994)                      |
| GIK23519      | 64.8  | -29.6  | 1893      | INA    | Millo et al. (2006)                          |
| M35003-4      | 12.1  | -61.2  | 1299      | INA    | Zahn and Stüber (2002)                       |
| ODP982        | 57.5  | -15.9  | 1134      | INA    | Venz et al. (1999); Venz and Hodell (2002)   |
| ODP983        | 60.4  | -23.6  | 1984      | INA    | Mc Intyre et al. (1999); Raymo et al. (2004) |
| ODP984        | 61    | -24    | 1650      | INA    | Raymo et al. (2004)                          |
| V28-127       | 11.7  | -80.1  | 1750      | INA    | Oppo and Fairbanks (1990)                    |
| V28-14        | 64.8  | -29.7  | 1855      | INA    | Boyle (1992)                                 |
| RC16-84       | -26.7 | -43.3  | 2438      | ISA    | Oppo and Horowitz (2000)                     |
| V24-253       | -26.9 | -44.7  | 2069      | ISA    | Oppo and Horowitz (2000)                     |
| CHN115-70     | -29.9 | -35.6  | 2340      | ISA    | Curry and Lohmann (1982)                     |
| MD96-2080     | -36.3 | 19.5   | 2488      | ISA    | Martínez-Méndez et al. (2008)                |
| ODP1088       | -41.1 | 13.6   | 2082      | ISA    | Hodell et al. (2003)                         |
| GeoB3104      | -3.7  | -37.7  | 767       | ISA    | Arz et al. (1999)                            |
| BT4           | -4    | 10     | 1000      | ISA    | Oppo and Fairbanks (1989)                    |
| KNR159-36     | -27.5 | -46.5  | 1268      | ISA    | Oppo and Horowitz, 2000                      |
| RC16-119      | -27.7 | -46.5  | 1567      | ISA    | Oppo and Horowitz (2000)                     |
| GeoB3004      | 14.6  | 52.9   | 1803      | II     | Schmiedl and Mackensen (2006)                |
| MD01-2378     | -13.1 | 121.8  | 1783      | II     | Xu et al. (2008)                             |
| Orgon4-KS8    | 23.5  | 59.2   | 2900      | DI     | Sirocko (1994)                               |
| SO42-74KL     | 14.3  | 57.3   | 3212      | DI     | Sirocko et al. (1993)                        |
| MD97-2151     | 8.7   | 109.9  | 1598      | IP     | Wei et al. (2006)                            |
| FR97-GC12     | -23.6 | 153.8  | 990       | IP     | Bostock et al. (2004)                        |
| V19-27        | -0.5  | -82.1  | 1373      | IP     | Mix et al. (1991)                            |
| EW9504-05     | 32.5  | -118.1 | 1818      | IP     | Stott et al. (2000)                          |
| GIK17961-2    | 8.5   | 112.3  | 1795      | IP     | Wang et al. (1999)                           |
| MD97-2120     | -45.5 | 174.9  | 1210      | IP     | Pahnke and Zahn (2005)                       |

| Core Name | Lat  | Lon    | Depth (m) | Region | Reference                                   |
|-----------|------|--------|-----------|--------|---------------------------------------------|
| NGC102    | 32.3 | 157.9  | 2612      | DP     | Ohkushi et al. (2003)                       |
| ODP807A   | 3.6  | 156.6  | 2804      | DP     | Zhang et al. (2007)                         |
| ODP846    | -3.1 | -90.8  | 3296      | DP     | Mix et al. (1995); Shackleton et al. (1995) |
| RC13-110  | -0.1 | -95.7  | 3231      | DP     | Mix et al. (1991)                           |
| RC13-114  | -1.7 | -103.6 | 3436      | DP     | Marchitto et al. (2005)                     |
| V24-109   | 0.4  | 158.8  | 2367      | DP     | Shackleton et al. (1992)                    |
| ODP1143   | 9.4  | 113.3  | 2772      | DP     | Tian et al. (2002)                          |

**Table A2.** Correlation coefficients and p-values between records. The upper rows are the raw data, and the bottom rows are the pre-whitened to account for autocorrelated time series. To investigate possible leads/lags between records, we shift the atmospheric CO<sub>2</sub> record in 100-year increments relative to the  $\delta^{13}\text{C}$  stacks and, for brevity, list only the best correlations. All p-values account for reduction in degrees of freedom due to either pre-whitening and/or time shifting.

| Record 1        | Record 2                                 | CO <sub>2</sub> time shift (years) | r <sup>2</sup>              |                      |
|-----------------|------------------------------------------|------------------------------------|-----------------------------|----------------------|
| CO <sub>2</sub> | API $\Delta\delta^{13}\text{C}_{I-D}$    | 0                                  | -0.97                       |                      |
| CO <sub>2</sub> | API $\Delta\delta^{13}\text{C}_{I-D}$    | +1000                              | -0.99                       |                      |
| CO <sub>2</sub> | AP $\Delta\delta^{13}\text{C}_{I-D}$     | 0                                  | -0.98                       |                      |
| CO <sub>2</sub> | AP $\Delta\delta^{13}\text{C}_{I-D}$     | +600                               | -0.98                       |                      |
| CO <sub>2</sub> | $\Delta\delta^{13}\text{C}_{(INA/2)-DP}$ | 0                                  | -0.98                       |                      |
| CO <sub>2</sub> | $\Delta\delta^{13}\text{C}_{(INA/2)-DP}$ | -200                               | -0.98                       |                      |
| CO <sub>2</sub> | Global $\delta^{13}\text{C}$ stack       | 0                                  | 0.93                        |                      |
| CO <sub>2</sub> | Global $\delta^{13}\text{C}$ stack       | +1000                              | 0.95                        |                      |
| Record 1        | Record 2                                 | CO <sub>2</sub> time shift (years) | Pre-whitened r <sup>2</sup> | Pre-whitened p-value |
| CO <sub>2</sub> | API $\Delta\delta^{13}\text{C}_{I-D}$    | 0                                  | -0.39                       | 0.08                 |
| CO <sub>2</sub> | API $\Delta\delta^{13}\text{C}_{I-D}$    | +900                               | -0.80                       | 0.0003               |
| CO <sub>2</sub> | AP $\Delta\delta^{13}\text{C}_{I-D}$     | 0                                  | -0.70                       | 0.002                |
| CO <sub>2</sub> | AP $\Delta\delta^{13}\text{C}_{I-D}$     | +300                               | -0.73                       | 0.002                |
| CO <sub>2</sub> | $\Delta\delta^{13}\text{C}_{(INA/2)-DP}$ | 0                                  | -0.79                       | 0.0002               |
| CO <sub>2</sub> | $\Delta\delta^{13}\text{C}_{(INA/2)-DP}$ | -200                               | -0.82                       | 0.0002               |
| CO <sub>2</sub> | Global $\delta^{13}\text{C}$ stack       | 0                                  | 0.20                        | 0.24                 |
| CO <sub>2</sub> | Global $\delta^{13}\text{C}$ stack       | -500                               | 0.36                        | 0.11                 |

*Competing interests.* The authors declare that they have no conflict of interest.

*Acknowledgements.* We acknowledge the following colleagues whose advice and input substantially improved drafts of this manuscript: David Lea, Syee Weldeab, Jake Gebbie, Andy Ridgwell, and James Rae. Funding for this work came from NSF grants MGG 0926735 and CDI 1125181.

## References

- Allen, K. A., Sikes, E. L., Hönisch, B., Elmore, A. C., Guilderson, T. P., Rosenthal, Y., and Anderson, R. F.: Southwest Pacific deep water carbonate chemistry linked to high southern latitude climate and atmospheric CO<sub>2</sub> during the last glacial termination, *Quaternary Science Reviews*, 122, 180–191, 2015.
- 5 Archer, D., Winguth, A., Lea, D., and Mahowald, N.: What caused the glacial/interglacial atmospheric pCO<sub>2</sub> cycles?, *Reviews of Geophysics* - Richmond Virginia, then Washington, 38, 159–190, 2000.
- Archer, D. E., Martin, P. A., Milovich, J., Brovkin, V., Plattner, G.-K., and Ashendel, C.: Model sensitivity in the effect of Antarctic sea ice and stratification on atmospheric pCO<sub>2</sub>, *Paleoceanography*, 18, 2003.
- Arz, H. W., Pätzold, J., and Wefer, G.: The deglacial history of the western tropical Atlantic as inferred from high resolution stable isotope  
10 records off northeastern Brazil, *Earth and Planetary Science Letters*, 167, 105–117, 1999.
- Aydin, M., Campbell, J., Fudge, T., Cuffey, K., Nicewonger, M., Verhulst, K., and Saltzman, E.: Changes in atmospheric carbonyl sulfide over the last 54,000 years inferred from measurements in Antarctic ice cores, *Journal of Geophysical Research: Atmospheres*, 2016.
- Bauska, T. K., Baggenstos, D., Brook, E. J., Mix, A. C., Marcott, S. A., Petrenko, V. V., Schaefer, H., Severinghaus, J. P., and Lee, J. E.: Carbon isotopes characterize rapid changes in atmospheric carbon dioxide during the last deglaciation, *Proceedings of the National  
15 Academy of Sciences*, 113, 3465–3470, 2016.
- Bertram, C. J., Elderfield, H., Shackleton, N. J., and MacDonald, J. A.: Cadmium/calcium and carbon isotope reconstructions of the glacial northeast Atlantic Ocean, *Paleoceanography*, 10, 563–578, 1995.
- Bickert, T. and Mackensen, A.: Last Glacial to Holocene changes in South Atlantic deep water circulation, in: *The South Atlantic in the Late Quaternary*, pp. 671–693, Springer, 2003.
- 20 Bickert, T. and Wefer, G.: Late Quaternary deep water circulation in the South Atlantic: Reconstruction from carbonate dissolution and benthic stable isotopes, in: *The South Atlantic*, pp. 599–620, Springer, 1996.
- Bickert, T. and Wefer, G.: South Atlantic and benthic foraminifer  $\delta^{13}\text{C}$  deviations: implications for reconstructing the Late Quaternary deep-water circulation, *Deep Sea Research Part II: Topical Studies in Oceanography*, 46, 437–452, 1999.
- Bostock, H. C., Opdyke, B. N., Gagan, M. K., and Fifield, L. K.: Carbon isotope evidence for changes in Antarctic Intermediate Water  
25 circulation and ocean ventilation in the southwest Pacific during the last deglaciation, *Paleoceanography*, 19, 2004.
- Boyle, E. and Keigwin, L.: Comparison of Atlantic and Pacific paleochemical records for the last 215,000 years: Changes in deep ocean circulation and chemical inventories, *Earth and Planetary Science Letters*, 76, 135–150, 1985.
- Boyle, E. A.: Cadmium and  $\delta^{13}\text{C}$  paleochemical ocean distributions during the stage 2 Glacial Maximum, *Annual Review of Earth and Planetary Sciences*, 20, 245, 1992.
- 30 Broecker, W. S.: Ocean chemistry during glacial time, *Geochimica et Cosmochimica Acta*, 46, 1689–1705, 1982.
- Brovkin, V., Ganopolski, A., Archer, D., and Rahmstorf, S.: Lowering of glacial atmospheric CO<sub>2</sub> in response to changes in oceanic circulation and marine biogeochemistry, *Paleoceanography*, 22, 2007.
- Brovkin, V., Ganopolski, A., Archer, D., and Munhoven, G.: Glacial CO<sub>2</sub> cycle as a succession of key physical and biogeochemical processes, *Climate of the Past*, 8, 251–264, 2012.
- 35 Buchanan, P. J., Matear, R. J., Lenton, A., Phipps, S. J., Chase, Z., and Etheridge, D. M.: The simulated climate of the Last Glacial Maximum and insights into the global marine carbon cycle, *Climate of the Past*, 12, 2271, 2016.
- Burke, A. and Robinson, L. F.: The Southern Ocean's role in carbon exchange during the last deglaciation, *Science*, 335, 557–561, 2012.



- Chapman, M. R. and Shackleton, N. J.: Millennial-scale fluctuations in North Atlantic heat flux during the last 150,000 years, *Earth and Planetary Science Letters*, 159, 57–70, 1998.
- Ciais, P., Tagliabue, A., Cuntz, M., Bopp, L., Scholze, M., Hoffmann, G., Laurantou, A., Harrison, S. P., Prentice, I., Kelley, D., et al.: Large inert carbon pool in the terrestrial biosphere during the Last Glacial Maximum, *Nature Geoscience*, 5, 74–79, 2012.
- 5 Cortijo, E., Lehman, S., Keigwin, L., Chapman, M., Paillard, D., and Labeyrie, L.: Changes in meridional temperature and salinity gradients in the North Atlantic Ocean (30–72 N) during the last interglacial period, *Paleoceanography*, 14, 23–33, 1999.
- Crosta, X. and Shemesh, A.: Reconciling down core anticorrelation of diatom carbon and nitrogen isotopic ratios from the Southern Ocean, *Paleoceanography*, 17, 2002.
- Curry, W. and Lohmann, G.: Carbon isotopic changes in benthic foraminifera from the western South Atlantic: Reconstruction of glacial  
10 abyssal circulation patterns, *Quaternary Research*, 18, 218–235, 1982.
- Curry, W. B. and Oppo, D. W.: Synchronous, high-frequency oscillations in tropical sea surface temperatures and North Atlantic Deep Water production during the last glacial cycle, *Paleoceanography*, 12, 1–14, 1997.
- Curry, W. B. and Oppo, D. W.: Glacial water mass geometry and the distribution of  $\delta^{13}\text{C}$  of  $\Sigma\text{CO}_2$  in the western Atlantic Ocean, *Paleoceanography*, 20, 2005.
- 15 Curry, W. B., Duplessy, J.-C., Labeyrie, L., and Shackleton, N. J.: Changes in the distribution of  $\delta^{13}\text{C}$  of deep water  $\Sigma\text{CO}_2$  between the last glaciation and the Holocene, *Paleoceanography*, 3, 317–341, 1988.
- Davies-Barnard, T., Ridgwell, A., Singarayer, J., and Valdes, P.: Quantifying the Influence of the Terrestrial Biosphere on Glacial-interglacial Climate Dynamics, *Climate of the Past*, 13, 1381–1401, 2017.
- Demenocal, P. B., Oppo, D. W., Fairbanks, R. G., and Prell, W. L.: Pleistocene  $\delta^{13}\text{C}$  variability of North Atlantic intermediate water,  
20 *Paleoceanography*, 7, 229–250, 1992.
- Duplessy, J., Shackleton, N., Fairbanks, R., Labeyrie, L., Oppo, D., and Kallel, N.: Deepwater source variations during the last climatic cycle and their impact on the global deepwater circulation, *Paleoceanography*, 3, 343–360, 1988.
- Duplessy, J.-C., Labeyrie, L., Arnold, M., Paterne, M., Duprat, J., and van Weering, T. C.: Changes in surface salinity of the North Atlantic Ocean during the last deglaciation, *Nature*, 358, 485, 1992.
- 25 Eggleston, S., Schmitt, J., Bereiter, B., Schneider, R., and Fischer, H.: Evolution of the stable carbon isotope composition of atmospheric  $\text{CO}_2$  over the last glacial cycle, *Paleoceanography*, 2016.
- Ferrari, R., Jansen, M. F., Adkins, J. F., Burke, A., Stewart, A. L., and Thompson, A. F.: Antarctic sea ice control on ocean circulation in present and glacial climates, *Proceedings of the National Academy of Sciences*, 111, 8753–8758, 2014.
- Flower, B. P., Oppo, D. W., McManus, J., Venz, K., Hodell, D., and Cullen, J.: North Atlantic intermediate to deep water circulation and  
30 chemical stratification during the past 1 Myr, *Paleoceanography*, 15, 388, 2000.
- Francois, R., Altabet, M. A., Yu, E.-F., Sigman, D. M., Bacon, M. P., Frank, M., Bohrmann, G., Bareille, G., and Labeyrie, L. D.: Contribution of Southern Ocean surface-water stratification to low atmospheric  $\text{CO}_2$  concentrations during the last glacial period, *Nature*, 389, 929–935, 1997.
- Freudenthal, T., Meggers, H., Henderiks, J., Kuhlmann, H., Moreno, A., and Wefer, G.: Upwelling intensity and filament activity off Morocco  
35 during the last 250,000 years, *Deep Sea Research Part II: Topical Studies in Oceanography*, 49, 3655–3674, 2002.
- Galbraith, E. D. and Jaccard, S. L.: Deglacial weakening of the oceanic soft tissue pump: global constraints from sedimentary nitrogen isotopes and oxygenation proxies, *Quaternary Science Reviews*, 109, 38–48, 2015.

- Gebbie, G., Peterson, C. D., Lisiecki, L. E., and Spero, H. J.: Global-mean marine  $\delta^{13}\text{C}$  and its uncertainty in a glacial state estimate, *Quaternary Science Reviews*, 125, 144–159, 2015.
- Gildor, H., Tziperman, E., and Toggweiler, J.: Sea ice switch mechanism and glacial-interglacial  $\text{CO}_2$  variations, *Global Biogeochemical Cycles*, 16, 2002.
- 5 Gloege, L., McKinley, G. A., Mouw, C. B., and Ciochetto, A. B.: Global evaluation of particulate organic carbon flux parameterizations and implications for atmospheric  $\text{pCO}_2$ , *Global Biogeochemical Cycles*, 31, 1192–1215, 2017.
- Gottschalk, J., Vázquez Riveiros, N., Waelbroeck, C., Skinner, L. C., Michel, E., Duplessy, J.-C., Hodell, D., and Mackensen, A.: Carbon isotope offsets between benthic foraminifer species of the genus *Cibicides* (*Cibicidoides*) in the glacial sub-Antarctic Atlantic, *Paleoceanography*, 31, 1583–1602, 2016.
- 10 Gu, S., Liu, Z., Zhang, J., Rempfer, J., Joos, F., and Oppo, D. W.: Coherent response of Antarctic Intermediate Water and Atlantic Meridional Overturning Circulation during the last deglaciation: reconciling contrasting neodymium isotope reconstructions from the tropical Atlantic, *Paleoceanography*, 32, 1036–1053, 2017.
- Herguera, J., Herbert, T., Kashgarian, M., and Charles, C.: Intermediate and deep water mass distribution in the Pacific during the Last Glacial Maximum inferred from oxygen and carbon stable isotopes, *Quaternary Science Reviews*, 29, 1228–1245, 2010.
- 15 Hertzberg, J. E., Lund, D. C., Schmittner, A., and Skrivane, A. L.: Evidence for a biological pump driver of atmospheric  $\text{CO}_2$  rise during Heinrich Stadial 1, *Geophysical Research Letters*, 43, 2016.
- Hesse, T., Butzin, M., Bickert, T., and Lohmann, G.: A model-data comparison of  $\delta^{13}\text{C}$  in the glacial Atlantic Ocean, *Paleoceanography*, 26, 2011.
- Hodell, D. A., Kanfoush, S. L., Shemesh, A., Crosta, X., Charles, C. D., and Guilderson, T. P.: Abrupt cooling of Antarctic surface waters and sea ice expansion in the South Atlantic sector of the Southern Ocean at 5000 cal yr BP, *Quaternary Research*, 56, 191–198, 2001.
- 20 Hodell, D. A., Venz, K. A., Charles, C. D., and Ninnemann, U. S.: Pleistocene vertical carbon isotope and carbonate gradients in the South Atlantic sector of the Southern Ocean, *Geochemistry, Geophysics, Geosystems*, 4, 1–19, 2003.
- Hodell, D. A., Channell, J. E., Curtis, J. H., Romero, O. E., and Röhl, U.: Onset of “Hudson Strait” Heinrich events in the eastern North Atlantic at the end of the middle Pleistocene transition ( 640 ka)?, *Paleoceanography*, 23, 2008.
- 25 Hodell, D. A., Evans, H. F., Channell, J. E., and Curtis, J. H.: Phase relationships of North Atlantic ice-rafted debris and surface-deep climate proxies during the last glacial period, *Quaternary Science Reviews*, 29, 3875–3886, 2010.
- Hoffman, J. and Lund, D.: Refining the stable isotope budget for Antarctic Bottom Water: New foraminiferal data from the abyssal southwest Atlantic, *Paleoceanography*, 27, 2012.
- Hoogakker, B., Smith, R., Singarayer, J., Marchant, R., Prentice, I., Allen, J., Anderson, R., Bhagwat, S., Behling, H., Borisova, O., et al.: 30 Terrestrial biosphere changes over the last 120 kyr, *Climate of the Past*, 12, 51–73, 2016.
- Joos, F., Gerber, S., Prentice, I., Otto-Bliesner, B. L., and Valdes, P. J.: Transient simulations of Holocene atmospheric carbon dioxide and terrestrial carbon since the Last Glacial Maximum, *Global Biogeochemical Cycles*, 18, 2004.
- Jung, S. and Sarnthein, M.: Stable isotope data of sediment cores GIK23415-9, PANGAEA, doi, 10, 2003.
- Jung, S. and Sarnthein, M.: Stable isotope analysis of foraminifera from sediment cores GIK17049-6, PANGAEA, doi, 10, 2004.
- 35 Kallel, N., Labeyrie, L. D., Juillet-Leclerc, A., and Duplessy, J.-C.: A deep hydrological front between intermediate and deep-water masses in the glacial Indian Ocean, *Nature*, 333, 651–655, 1988.
- Kaplan, J. O., Prentice, I. C., Knorr, W., and Valdes, P. J.: Modeling the dynamics of terrestrial carbon storage since the Last Glacial Maximum, *Geophysical Research Letters*, 29, 2002.

- Kerr, J., Rickaby, R., Yu, J., Elderfield, H., and Sadekov, A. Y.: The effect of ocean alkalinity and carbon transfer on deep-sea carbonate ion concentration during the past five glacial cycles, *Earth and Planetary Science Letters*, 471, 42–53, 2017.
- Kohfeld, K. E. and Chase, Z.: Temporal evolution of mechanisms controlling ocean carbon uptake during the last glacial cycle, *Earth and Planetary Science Letters*, 472, 206–215, 2017.
- 5 Kohfeld, K. E. and Ridgwell, A.: Glacial-interglacial variability in atmospheric CO<sub>2</sub>, *Surface Ocean/Lower Atmosphere Processes, Geophysical Monograph Series*, 37, 2009.
- Köhler, P. and Fischer, H.: Simulating changes in the terrestrial biosphere during the last glacial/interglacial transition, *Global and Planetary Change*, 43, 33–55, 2004.
- Köhler, P., Joos, F., Gerber, S., and Knutti, R.: Simulated changes in vegetation distribution, land carbon storage, and atmospheric CO<sub>2</sub> in response to a collapse of the North Atlantic thermohaline circulation, *Climate Dynamics*, 25, 689–708, 2005.
- 10 Köhler, P., Fischer, H., and Schmitt, J.: Atmospheric  $\delta^{13}\text{C}$  and its relation to pCO<sub>2</sub> and deep ocean  $\delta^{13}\text{C}$  during the late Pleistocene, *Paleoceanography*, 25, 2010.
- Lacerra, M., Lund, D., Yu, J., and Schmittner, A.: Carbon storage in the mid-depth Atlantic during millennial-scale climate events, *Paleoceanography*, 2017.
- 15 Landais, A., Lathiere, J., Barkan, E., and Luz, B.: Reconsidering the change in global biosphere productivity between the Last Glacial Maximum and present day from the triple oxygen isotopic composition of air trapped in ice cores, *Global biogeochemical cycles*, 21, 2007.
- Lisiecki, L.: Atlantic overturning responses to obliquity and precession over the last 3 Myr, *Paleoceanography*, 29, 71–86, 2014.
- Lisiecki, L. E.: A benthic  $\delta^{13}\text{C}$ -based proxy for atmospheric pCO<sub>2</sub> over the last 1.5 Myr, *Geophysical Research Letters*, 37, n/a–n/a, <https://doi.org/10.1029/2010GL045109>, <http://dx.doi.org/10.1029/2010GL045109>, 121708, 2010.
- 20 Lisiecki, L. E., Raymo, M. E., and Curry, W. B.: Atlantic overturning responses to Late Pleistocene climate forcings, *Nature*, 456, 85–88, 2008.
- Lund, D., Adkins, J., and Ferrari, R.: Abyssal Atlantic circulation during the Last Glacial Maximum: Constraining the ratio between transport and vertical mixing, *Paleoceanography*, 26, 2011a.
- 25 Lund, D., Tessin, A., Hoffman, J., and Schmittner, A.: Southwest Atlantic water mass evolution during the last deglaciation, *Paleoceanography*, 30, 477–494, 2015.
- Lund, D. C., Mix, A. C., and Southon, J.: Increased ventilation age of the deep northeast Pacific Ocean during the last deglaciation, *Nature Geoscience*, 4, 771–774, 2011b.
- Lutze, G. and Thiel, H.: Epibenthic foraminifera from elevated microhabitats; *Cibicides wuellerstorfi* and *Planulina ariminensis*, *Journal of Foraminiferal Research*, 19, 153–158, 1989.
- 30 Lynch-Stieglitz, J., Stocker, T. F., Broecker, W. S., and Fairbanks, R. G.: The influence of air-sea exchange on the isotopic composition of oceanic carbon: Observations and modeling, *Global Biogeochemical Cycles*, 9, 653–665, 1995.
- Lynch-Stieglitz, J., Adkins, J. F., Curry, W. B., Dokken, T., Hall, I. R., Herguera, J. C., Hirschi, J. J.-M., Ivanova, E. V., Kissel, C., Marchal, O., et al.: Atlantic meridional overturning circulation during the Last Glacial Maximum, *science*, 316, 66–69, 2007.
- 35 Mackensen, A.: On the use of benthic foraminiferal  $\delta^{13}\text{C}$  in palaeoceanography: constraints from primary proxy relationships, *Geological Society, London, Special Publications*, 303, 121–133, 2008.
- Mackensen, A. and Bickert, T.: Stable carbon isotopes in benthic foraminifera: proxies for deep and bottom water circulation and new production, in: *Use of proxies in paleoceanography*, pp. 229–254, Springer, 1999.

- Marchitto, T. M. and Broecker, W. S.: Deep water mass geometry in the glacial Atlantic Ocean: A review of constraints from the paleonutrient proxy Cd/Ca, *Geochemistry, Geophysics, Geosystems*, 7, 2006.
- Marchitto, T. M., Lynch-Stieglitz, J., and Hemming, S. R.: Deep Pacific CaCO<sub>3</sub> compensation and glacial–interglacial atmospheric CO<sub>2</sub>, *Earth and Planetary Science Letters*, 231, 317–336, 2005.
- 5 Marcott, S. A., Bauska, T. K., Buizert, C., Steig, E. J., Rosen, J. L., Cuffey, K. M., Fudge, T., Severinghaus, J. P., Ahn, J., Kalk, M. L., et al.: Centennial-scale changes in the global carbon cycle during the last deglaciation, *Nature*, 514, 616–619, 2014.
- Marinov, I., Follows, M., Gnanadesikan, A., Sarmiento, J. L., and Slater, R. D.: How does ocean biology affect atmospheric pCO<sub>2</sub>? Theory and models, *Journal of Geophysical Research: Oceans*, 113, 2008a.
- Marinov, I., Gnanadesikan, A., Sarmiento, J. L., Toggweiler, J., Follows, M., and Mignone, B.: Impact of oceanic circulation on biological  
10 carbon storage in the ocean and atmospheric pCO<sub>2</sub>, *Global Biogeochemical Cycles*, 22, 2008b.
- Martin, P. A. and Lea, D. W.: Comparison of water mass changes in the deep tropical Atlantic derived from Cd/Ca and carbon isotope records: Implications for changing Ba composition of deep Atlantic water masses, *Paleoceanography*, 13, 572–585, 1998.
- Martínez-García, A., Rosell-Melé, A., Geibert, W., Gersonde, R., Masqué, P., Gaspari, V., and Barbante, C.: Links between iron supply, marine productivity, sea surface temperature, and CO<sub>2</sub> over the last 1.1 Ma, *Paleoceanography*, 24, 2009.
- 15 Martínez-Méndez, G., Zahn, R., Hall, I. R., Pena, L. D., and Cacho, I.: 345,000-year-long multi-proxy records off South Africa document variable contributions of Northern versus Southern Component Water to the Deep South Atlantic, *Earth and Planetary Science Letters*, 267, 309–321, 2008.
- Matsumoto, K. and Lynch-Stieglitz, J.: Similar glacial and Holocene deep water circulation inferred from southeast Pacific benthic foraminiferal carbon isotope composition, *Paleoceanography*, 14, 149–163, 1999.
- 20 Matsumoto, K., Oba, T., Lynch-Stieglitz, J., and Yamamoto, H.: Interior hydrography and circulation of the glacial Pacific Ocean, *Quaternary Science Reviews*, 21, 1693–1704, 2002.
- Mc Intyre, K., Ravelo, A., and Delaney, M.: North Atlantic intermediate waters in the late Pliocene to early Pleistocene, *Paleoceanography*, 14, 324–335, 1999.
- McManus, J., Francois, R., Gherardi, J.-M., Keigwin, L., and Brown-Leger, S.: Collapse and rapid resumption of Atlantic meridional circulation linked to deglacial climate changes, *Nature*, 428, 834–837, 2004.
- 25 Menviel, L., Joos, F., and Ritz, S.: Simulating atmospheric CO<sub>2</sub>,  $\delta^{13}\text{C}$  and the marine carbon cycle during the Last Glacial–Interglacial cycle: possible role for a deepening of the mean remineralization depth and an increase in the oceanic nutrient inventory, *Quaternary Science Reviews*, 56, 46–68, 2012.
- Menviel, L., Yu, J., Joos, F., Mouchet, A., Meissner, K., and England, M.: Poorly ventilated deep ocean at the Last Glacial Maximum inferred  
30 from carbon isotopes: A data-model comparison study, *Paleoceanography*, 32, 2–17, 2017.
- Millo, C., Sarnthein, M., Voelker, A., and Erlenkeuser, H.: Variability of the Denmark Strait overflow during the last glacial maximum, *Boreas*, 35, 50–60, 2006.
- Mix, A., Pisias, N., Zahn, R., Rugh, W., Lopez, C., and Nelson, K.: Carbon 13 in Pacific Deep and Intermediate Waters, 0–370 ka: Implications for Ocean Circulation and Pleistocene CO<sub>2</sub>, *Paleoceanography*, 6, 205–226, 1991.
- 35 Mix, A. C., Pisias, N. G., Rugh, W., Wilson, J., Morey, A., and Hagelberg, T.: Benthic foraminifer stable isotope record from Site 849 (0–5 Ma): Local and global climate changes, *Proceedings of the Ocean Drilling Program, Scientific Results*, 1995.

- Monnin, E., Steig, E. J., Siegenthaler, U., Kawamura, K., Schwander, J., Stauffer, B., Stocker, T. F., Morse, D. L., Barnola, J.-M., Bellier, B., et al.: Evidence for substantial accumulation rate variability in Antarctica during the Holocene, through synchronization of CO<sub>2</sub> in the Taylor Dome, Dome C and DML ice cores, *Earth and Planetary Science Letters*, 224, 45–54, 2004.
- Mulitza, S., Prange, M., Stuut, J.-B., Zabel, M., von Dobeneck, T., Itambi, A. C., Nizou, J., Schulz, M., and Wefer, G.: Sahel megadroughts triggered by glacial slowdowns of Atlantic meridional overturning, *Paleoceanography*, 23, 2008.
- Ohkushi, K., Itaki, T., and Nemoto, N.: Last Glacial–Holocene change in intermediate-water ventilation in the Northwestern Pacific, *Quaternary Science Reviews*, 22, 1477–1484, 2003.
- Oliver, K. I., Hoogakker, B. A., Crowhurst, S., Henderson, G., Rickaby, R., Edwards, N., and Elderfield, H.: A synthesis of marine sediment core  $\delta^{13}\text{C}$  data over the last 150 000 years, *Climate of the Past*, 6, 645–673, 2010.
- 10 Oppo, D. and Fairbanks, R.: Atlantic Ocean thermohaline circulation of the last 150,000 years: Relationship to climate and atmospheric CO<sub>2</sub>, *Paleoceanography*, 5, 277–288, 1990.
- Oppo, D. W. and Fairbanks, R. G.: Variability in the deep and intermediate water circulation of the Atlantic Ocean during the past 25,000 years: Northern Hemisphere modulation of the Southern Ocean, *Earth and Planetary Science Letters*, 86, 1–15, 1987.
- Oppo, D. W. and Fairbanks, R. G.: Carbon isotope composition of tropical surface water during the past 22,000 years, *Paleoceanography*, 4, 333–351, 1989.
- 15 Oppo, D. W. and Horowitz, M.: Glacial deep water geometry: South Atlantic benthic foraminiferal Cd/Ca and  $\delta^{13}\text{C}$  evidence, *Paleoceanography*, 15, 147–160, 2000.
- Oppo, D. W. and Lehman, S. J.: Suborbital timescale variability of North Atlantic Deep Water during the past 200,000 years, *Paleoceanography*, 10, 901–910, 1995.
- 20 Oppo, D. W., McManus, J. F., and Cullen, J. L.: Evolution and demise of the Last Interglacial warmth in the subpolar North Atlantic, *Quaternary Science Reviews*, 25, 3268–3277, 2006.
- Oppo, D. W., Curry, W. B., and McManus, J. F.: What do benthic  $\delta^{13}\text{C}$  and  $\delta^{18}\text{O}$  data tell us about Atlantic circulation during Heinrich Stadial 1?, *Paleoceanography*, 30, 353–368, 2015.
- Pahnke, K. and Zahn, R.: Southern Hemisphere water mass conversion linked with North Atlantic climate variability, *Science*, 307, 1741–1746, 2005.
- 25 Paillard, D. and Parrenin, F.: The Antarctic ice sheet and the triggering of deglaciations, *Earth and Planetary Science Letters*, 227, 263–271, 2004.
- Peacock, S., Lane, E., and Restrepo, J. M.: A possible sequence of events for the generalized glacial-interglacial cycle, *Global Biogeochemical Cycles*, 20, 2006.
- 30 Peterson, C. D., Lisiecki, L. E., and Stern, J. V.: Deglacial whole-ocean  $\delta^{13}\text{C}$  change estimated from 480 benthic foraminiferal records, *Paleoceanography*, 29, 549–563, 2014.
- Raymo, M. E., Oppo, D. W., Flower, B. P., Hodell, D., McManus, J. F., Venz, K., Kleiven, K., and McIntyre, K.: Stability of North Atlantic water masses in face of pronounced climate variability during the Pleistocene, *Paleoceanography*, 19, 2004.
- Richter, T.: Sedimentary fluxes at the mid-atlantic ridge-sediment sources, accumulation rates, and geochemical characterisation, GEOMAR Report, GEOMAR Research Center for Marine Geosciences, Christian Albrechts University in Kiel, 73, 173, 1998.
- 35 Ruddiman, W. F. and Ellis, E. C.: Effect of per-capita land use changes on Holocene forest clearance and CO<sub>2</sub> emissions, *Quaternary Science Reviews*, 28, 3011–3015, 2009.

- Rüggeberg, A., Dorschel, B., Dullo, W.-C., and Hebbeln, D.: Sedimentary patterns in the vicinity of a carbonate mound in the Hovland Mound Province, northern Porcupine Seabight, in: *Cold-water Corals and Ecosystems*, pp. 87–112, Springer, <https://doi.org/10.1594/PANGAEA.711998>, 2005.
- Sarnthein, M., Winn, K., Jung, S. J., Duplessy, J.-C., Labeyrie, L., Erlenkeuser, H., and Ganssen, G.: Changes in east Atlantic deepwater circulation over the last 30,000 years: Eight time slice reconstructions, *Paleoceanography*, 9, 209–267, 1994.
- Schmiedl, G. and Mackensen, A.: Late Quaternary paleoproductivity and deep water circulation in the eastern South Atlantic Ocean: Evidence from benthic foraminifera, *Palaeogeography, Palaeoclimatology, Palaeoecology*, 130, 43–80, 1997.
- Schmiedl, G. and Mackensen, A.: Multispecies stable isotopes of benthic foraminifera reveal past changes of organic matter decomposition and deepwater oxygenation in the Arabian Sea, *Paleoceanography*, 21, 2006.
- Schmitt, J., Schneider, R., Elsig, J., Leuenberger, D., Laurantou, A., Chappellaz, J., Köhler, P., Joos, F., Stocker, T. F., Leuenberger, M., et al.: Carbon isotope constraints on the deglacial CO<sub>2</sub> rise from ice cores, *Science*, 336, 711–714, 2012.
- Schmittner, A., Bostock, H. C., Cartapanis, O., Curry, W. B., Filipsson, H. L., Galbraith, E. D., Gottschalk, J., Herguera, J. C., Hoogakker, B., Jaccard, S., et al.: Calibration of the Carbon Isotope Composition ( $\delta^{13}\text{C}$ ) of Benthic Foraminifera, *Paleoceanography*, 32, 512–530, 2017.
- Schönfeld, J., Zahn, R., and de Abreu, L.: Surface and deep water response to rapid climate changes at the Western Iberian Margin, *Global and Planetary Change*, 36, 237–264, 2003.
- Schweizer, M., Pawlowski, J., Kouwenhoven, T., and van der Zwaan, B.: Molecular phylogeny of common cibicidids and related Rotaliida (Foraminifera) based on small subunit rDNA sequences, *The Journal of Foraminiferal Research*, 39, 300–315, 2009.
- Shackleton, N.: Carbon-13 in *Uvigerina*: Tropical rainforest history and the equatorial Pacific carbonate dissolution cycles, *Marine science*, 1977.
- Shackleton, N., Le, J., Mix, A., and Hall, M.: Carbon isotope records from Pacific surface waters and atmospheric carbon dioxide, *Quaternary Science Reviews*, 11, 387–400, 1992.
- Shackleton, N., Hall, M., and Pate, D.: 15. Pliocene stable isotope stratigraphy of Site 846, in: *Proc. Ocean Drill. Program Sci. Results*, vol. 138, pp. 337–355, 1995.
- Shackleton, N. J., Imbrie, J., and Hall, M.: Oxygen and carbon isotope record of East Pacific core V19-30: implications for the formation of deep water in the late Pleistocene North Atlantic, *Earth and Planetary Science Letters*, 65, 233–244, 1983.
- Siegenthaler, U., Stocker, T. F., Monnin, E., Lüthi, D., Schwander, J., Stauffer, B., Raynaud, D., Barnola, J.-M., Fischer, H., Masson-Delmotte, V., et al.: Stable carbon cycle–climate relationship during the late Pleistocene, *Science*, 310, 1313–1317, 2005.
- Sigman, D. M. and Boyle, E. A.: Glacial/interglacial variations in atmospheric carbon dioxide, *Nature*, 407, 859–869, 2000.
- Sikes, E. L., Cook, M. S., and Guilderson, T. P.: Reduced deep ocean ventilation in the Southern Pacific Ocean during the last glaciation persisted into the deglaciation, *Earth and Planetary Science Letters*, 438, 130–138, 2016.
- Sikes, E. L., Allen, K. A., and Lund, D. C.: Enhanced  $\delta^{13}\text{C}$  and  $\delta^{18}\text{O}$  Differences Between the South Atlantic and South Pacific During the Last Glaciation: The Deep Gateway Hypothesis, *Paleoceanography*, 32, 1000–1017, 2017.
- Sirocko, F.: Abrupt change in monsoonal climate: evidence from the geochemical composition of Arabian Sea sediments, Ph.D. thesis, Christian-Albrechts-Universität zu Kiel, 1994.
- Sirocko, F., Sarnthein, M., Erlenkeuser, H., Lange, H., Arnold, M., and Duplessy, J. C.: Century-scale events in monsoonal climate over the past 24,000 years, *Nature*, 364, 322, 1993.

- Skinner, L. and Shackleton, N.: Rapid transient changes in northeast Atlantic deep water ventilation age across Termination I, *Paleoceanography*, 19, 2004.
- Skinner, L., Fallon, S., Waelbroeck, C., Michel, E., and Barker, S.: Ventilation of the deep Southern Ocean and deglacial CO<sub>2</sub> rise, *Science*, 328, 1147–1151, 2010.
- 5 Skinner, L. C., Primeau, F., Freeman, E., de la Fuente, M., Goodwin, P., Gottschalk, J., Huang, E., McCave, I., Noble, T., and Scrivner, A.: Radiocarbon constraints on the glacial ocean circulation and its impact on atmospheric CO<sub>2</sub>, *Nature communications*, 8, 16010, 2017.
- Slowey, N. C. and Curry, W. B.: Glacial-interglacial differences in circulation and carbon cycling within the upper western North Atlantic, *Paleoceanography*, 10, 715–732, 1995.
- Stern, J. V. and Lisiecki, L. E.: Termination 1 timing in radiocarbon-dated regional benthic  $\delta^{18}\text{O}$  stacks, *Paleoceanography*, 29, 1127–1142, 10 2014.
- Stott, L. D., Neumann, M., and Hammond, D.: Intermediate water ventilation on the northeastern Pacific margin during the late Pleistocene inferred from benthic foraminiferal  $\delta^{13}\text{C}$ , *Paleoceanography*, 15, 161–169, 2000.
- Talley, L. D.: Closure of the global overturning circulation through the Indian, Pacific, and Southern Oceans: Schematics and transports, *Oceanography*, 26, 80–97, 2013.
- 15 Tessin, A. and Lund, D.: Isotopically depleted carbon in the mid-depth South Atlantic during the last deglaciation, *Paleoceanography*, 28, 296–306, 2013.
- Thornalley, D. J., Elderfield, H., and McCave, I. N.: Intermediate and deep water paleoceanography of the northern North Atlantic over the past 21,000 years, *Paleoceanography*, 25, 2010.
- Tian, J., Wang, P., Cheng, X., and Li, Q.: Astronomically tuned Plio–Pleistocene benthic  $\delta^{18}\text{O}$  record from South China Sea and Atlantic–20 Pacific comparison, *Earth and Planetary Science Letters*, 203, 1015–1029, 2002.
- Tjallingii, R., Claussen, M., Stuut, J.-B. W., Fohlmeister, J., Jahn, A., Bickert, T., Lamy, F., and Röhl, U.: Coherent high-and low-latitude control of the northwest African hydrological balance, *Nature Geoscience*, 1, 670, 2008.
- Toggweiler, J., Russell, J. L., and Carson, S.: Midlatitude westerlies, atmospheric CO<sub>2</sub>, and climate change during the ice ages, *Paleoceanography*, 21, 2006.
- 25 Vecsei, A. and Berger, W. H.: Increase of atmospheric CO<sub>2</sub> during deglaciation: constraints on the coral reef hypothesis from patterns of deposition, *Global Biogeochemical Cycles*, 18, 2004.
- Venz, K. A. and Hodell, D. A.: New evidence for changes in Plio–Pleistocene deep water circulation from Southern Ocean ODP Leg 177 Site 1090, *Palaeogeography, Palaeoclimatology, Palaeoecology*, 182, 197–220, 2002.
- Venz, K. A., Hodell, D. A., Stanton, C., and Warnke, D. A.: A 1.0 Myr record of Glacial North Atlantic Intermediate Water variability from30 ODP site 982 in the northeast Atlantic, *Paleoceanography*, 14, 42–52, 1999.
- Veum, T., Jansen, E., Arnold, M., Beyer, I., and Duplessy, J.-C.: Water mass exchange between the North Atlantic and the Norwegian Sea during the past 28,000 years, *Nature*, 356, 783, 1992.
- Voelker, A. H. and de Abreu, L.: A review of abrupt climate change events in the Northeastern Atlantic Ocean (Iberian Margin): Latitudinal, longitudinal, and vertical gradients, *Abrupt Climate Change: Mechanisms, Patterns, and Impacts*, pp. 15–37, 2011.
- 35 Waelbroeck, C., Skinner, L., Labeyrie, L., Duplessy, J.-C., Michel, E., Vazquez Riveiros, N., Gherardi, J.-M., and Dewilde, F.: The timing of deglacial circulation changes in the Atlantic, *Paleoceanography*, 26, 2011.
- Wagner, M. and Hendy, I. L.: Trace metal evidence for a poorly ventilated glacial Southern Ocean, *Quaternary Science Reviews*, 170, 109–120, 2017.

- Wang, L., Sarnthein, M., Erlenkeuser, H., Grimalt, J., Grootes, P., Heilig, S., Ivanova, E., Kienast, M., Pelejero, C., and Pflaumann, U.: East Asian monsoon climate during the Late Pleistocene: high-resolution sediment records from the South China Sea, *Marine Geology*, 156, 245–284, 1999.
- Wei, G.-J., Huang, C.-Y., Wang, C.-C., Lee, M.-Y., and Wei, K.-Y.: High-resolution benthic foraminifer  $\delta^{13}\text{C}$  records in the South China Sea during the last 150 ka, *Marine Geology*, 232, 227–235, 2006.
- Weinelt, M. and Sarnthein, M.: Stable isotope analysis on sediment core GIK11944-2, PANGAEA, doi: 10.1594/PANGAEA. 97104 Reference (s): Weinelt, Mara (1993): Veränderungen der Oberflächenzirkulation im Europäischen Nordmeer während der letzten 60.000 Jahre-Hinweise aus stabilen Isotopen, *Berichte aus dem Sonderforschungsbereich 313*, Christian-Albrechts-Universität, Kiel, 41, 106, 2003.
- 10 Weinelt, M., Vogelsang, E., Kucera, M., Pflaumann, U., Sarnthein, M., Voelker, A., Erlenkeuser, H., and Malmgren, B.: Variability of North Atlantic heat transfer during MIS 2, *Paleoceanography*, 18, 2003.
- Woodruff, F. and Chambers, S.: Middle Miocene benthic foraminiferal oxygen and carbon isotopes and stratigraphy: southern ocean site 744, in: *Proc. ODP Sci. Results*, vol. 119, pp. 935–939, 1991.
- Woodruff, F. and Savin, S. M.:  $\delta^{13}\text{C}$  values of Miocene Pacific benthic foraminifera: Correlations with sea level and biological productivity, *Geology*, 13, 119–122, 1985.
- 15 Xu, J., Holbourn, A., Kuhnt, W., Jian, Z., and Kawamura, H.: Changes in the thermocline structure of the Indonesian outflow during Terminations I and II, *Earth and Planetary Science Letters*, 273, 152–162, 2008.
- Yu, J., Anderson, R., and Rohling, E.: Deep ocean carbonate chemistry and glacial-interglacial atmospheric  $\text{CO}_2$  changes, *Oceanography*, 2014.
- 20 Zahn, R. and Stüber, A.: Suborbital intermediate water variability inferred from paired benthic foraminiferal Cd/Ca and  $\delta^{13}\text{C}$  in the tropical West Atlantic and linking with North Atlantic climates, *Earth and Planetary Science Letters*, 200, 191–205, 2002.
- Zahn, R., Winn, K., and Sarnthein, M.: Benthic foraminiferal  $\delta^{13}\text{C}$  and accumulation rates of organic carbon: *Uvigerina peregrina* group and *Cibicidoides wuellerstorfi*, *Paleoceanography*, 1, 27–42, 1986.
- Zarriess, M. and Mackensen, A.: Testing the impact of seasonal phytodetritus deposition on  $\delta^{13}\text{C}$  of epibenthic foraminifer *Cibicidoides wuellerstorfi*: A 31,000 year high-resolution record from the northwest African continental slope, *Paleoceanography*, 26, 2011.
- 25 Zhang, J., Wang, P., Li, Q., Cheng, X., Jin, H., and Zhang, S.: Western equatorial Pacific productivity and carbonate dissolution over the last 550 kyr: Foraminiferal and nannofossil evidence from ODP Hole 807A, *Marine Micropaleontology*, 64, 121–140, 2007.
