# Supplementary material for: Deglacial carbon cycle changes observed in a compilation of 117 benthic δ 13 C time series (20–6 ka)
Source: Copernicus journal article supplement (doi:10.5194/cp-2018-25), 2018-03-15
Supplement: Supplementary file 1 [file DI_sites.xls]

## Sheet: DI_sites
Orgon4-KS8			SO42-74KL
0.03	NaN	NaN	0.02	0	0.11
0.21	NaN	-0.05	0.05	0.27839	NaN
0.25	0.10351	NaN	0.08	0.55679	NaN
0.31	0.65555	NaN	0.1	0.74238	0.03
0.36	1.1156	0.06	0.12	0.92798	-0.16
0.41	1.5756	-0.02	0.15	1.2064	NaN
0.46	2.3164	NaN	0.18	1.4987	0.13
0.5	2.9237	NaN	0.2	1.79	0.17
0.56	3.7065	NaN	0.22	2.1905	0.19
0.61	4.162	-0.06	0.25	2.7759	0.17
0.66	4.5217	0	0.28	3.3291	NaN
0.71	4.8749	0	0.3	3.642	0.25
0.75	5.1551	NaN	0.32	3.9704	NaN
0.81	5.5617	NaN	0.35	4.4125	0.16
0.86	5.8852	0.06	0.38	4.8323	NaN
0.91	6.3003	0.01	0.4	5.1083	0
0.96	7.0725	-0.04	0.42	5.3768	NaN
0.99	7.436	NaN	0.45	5.6959	0.07
1.06	8.0607	NaN	0.48	5.9959	0.25
1.11	8.428	0.07	0.5	6.2841	0.22
1.16	8.8145	NaN	0.52	6.7709	0.05
1.2	9.1276	NaN	0.55	7.4152	0.12
1.26	9.4896	0.03	0.58	7.928	0.21
1.31	9.749	0.08	0.6	8.2274	0.17
1.36	9.9818	NaN	0.62	8.5168	0.1
1.4	10.16	-0.15	0.65	8.8901	NaN
1.46	10.435	-0.01	0.68	9.2469	0.07
1.51	10.679	-0.14	0.7	9.4695	0.13
1.56	10.934	0.05	0.72	9.6831	NaN
1.6	11.135	-0.13	0.75	9.9186	NaN
1.66	11.414	NaN	0.78	10.142	0
1.71	11.634	-0.28	0.8	10.296	0.1
1.76	11.833	-0.28	0.82	10.45	0.14
1.8	11.992	-0.32	0.85	10.697	0.16
1.86	12.183	-0.28	0.88	10.955	-0.29
1.91	12.339	-0.26	0.9	11.128	0.23
1.96	12.486	-0.37	0.92	11.304	0.06
1.98	12.544	-0.39	0.95	11.567	0.05
2.06	12.788	-0.22	0.98	11.831	-0.15
2.11	12.949	NaN	1	12.034	-0.16
2.16	13.065	-0.13	1.02	12.22	0.01
2.22	13.13	NaN	1.05	12.488	-0.1
2.26	13.195	-0.23	1.08	12.753	-0.1
2.31	13.381	-0.24	1.1	12.943	-0.14
2.36	13.567	-0.19	1.12	13.073	0.49
2.4	13.722	NaN	1.15	13.18	-0.26
2.46	13.957	-0.32	1.18	13.513	-0.19
2.51	14.121	-0.24	1.2	13.737	-0.25
2.56	14.287	-0.25	1.22	13.957	-0.03
2.6	14.415	-0.2	1.25	14.221	-0.03
2.66	14.641	-0.21	1.28	14.476	NaN
2.71	14.89	-0.55	1.3	14.644	NaN
2.76	15.143	-0.34	1.32	14.81	NaN
2.8	15.408	-0.62	1.35	15.065	0.18
2.86	15.862	-0.56	1.38	15.358	NaN
2.91	16.221	-0.61	1.4	15.577	-0.37
2.96	16.537	-0.49	1.42	15.829	-0.41
2.99	16.746	NaN	1.45	16.208	-0.25
3.01	16.886	-0.51	1.48	16.585	0.04
3.06	17.25	-0.53	1.5	16.861	-0.16
3.11	17.629	-0.46	1.52	17.143	-0.34
3.16	18.049	NaN	1.55	17.575	-0.69
3.21	18.46	-0.6	1.58	17.966	-0.33
3.26	18.859	-0.59	1.6	18.231	-0.31
3.31	19.298	-0.56	1.62	18.485	-0.3
3.36	19.73	-0.6	1.65	18.863	-0.39
3.41	20.141	-0.67	1.68	19.277	-0.49
3.46	20.48	-0.4	1.7	19.553	-0.61
3.5	20.75	NaN	1.72	19.822	-0.23
3.56	21.159	-0.76	1.75	20.241	-0.35
3.61	21.51	-0.47	1.78	20.741	-0.3
3.66	21.898	-0.57	1.8	21.077	-0.24
3.71	22.325	-0.77	1.82	21.412	-0.37
3.76	22.807	-0.79	1.85	21.983	-0.35
3.8	23.191	NaN	1.88	22.553	-0.43
3.86	23.763	-0.65	1.9	22.932	-0.44
3.91	24.235	-0.87	1.92	23.31	-0.46
3.96	24.714	-0.63	1.95	23.872	-0.5
4.01	25.248	-0.68	1.98	24.433	-0.44
4.06	25.785	NaN	2	24.777	-0.5
4.11	26.304	NaN	2.02	25.071	-0.39
4.16	26.764	NaN	2.05	25.447	-0.52
4.21	27.269	NaN	2.08	25.771	-0.42
4.26	27.849	NaN	2.1	25.982	-0.1
4.31	28.496	NaN	2.12	26.189	-0.26
4.36	29.145	NaN	2.15	26.461	-0.27
4.41	29.707	NaN	2.18	26.718	-0.35
4.46	30.238	NaN	2.2	26.878	-0.35
4.51	30.756	NaN	2.22	27.05	-0.19
4.56	31.304	NaN	2.25	27.284	-0.34
4.61	31.879	NaN	2.28	27.532	-0.37
4.66	32.453	-0.5	2.3	27.716	-0.64
4.71	32.997	-0.36	2.32	27.871	-0.35
4.76	33.488	NaN	2.35	28.073	-0.3
4.81	33.979	NaN	2.38	28.268	NaN
4.86	34.467	-0.6	2.4	28.406	NaN
4.91	34.753	-0.44	2.42	28.544	-0.13
4.96	34.836	NaN	2.45	28.75	-0.33
5.01	35.107	-0.49	2.48	28.957	-0.2
5.04	35.275	NaN	2.5	29.075	-0.34
5.06	35.427	-0.41	2.52	29.189	-0.97
5.11	36.175	-0.34	2.55	29.36	-0.86
5.16	36.823	-0.22	2.58	29.531	-0.29
5.21	37.113	NaN	2.6	29.645	-0.15
5.26	37.403	NaN	2.62	29.753	-0.06
5.31	37.693	NaN	2.65	29.914	-0.3
5.36	37.986	-0.46	2.68	30.075	-0.29
5.41	38.282	-0.31	2.7	30.182	0.26
5.46	38.588	-0.43	2.72	30.306	-0.19
5.51	38.915	-0.29	2.75	30.567	-0.12
5.56	39.348	-0.42	2.78	30.92	-0.14
5.61	NaN	-0.49	2.8	31.275	-0.21
5.66	NaN	-0.52	2.82	31.631	-0.12
5.71	NaN	-0.59	2.85	32.199	-0.25
5.76	NaN	-0.53	2.88	32.76	-0.25
5.81	NaN	NaN	2.9	33.142	-0.21
5.86	NaN	-0.41	2.92	33.513	-0.1
5.91	NaN	-0.62	2.95	34.07	-0.25
5.96	NaN	-0.59	2.98	34.623	-0.39
6.01	NaN	NaN	3	34.769	-0.05
6.04	NaN	NaN	3.02	34.937	-0.44
NaN	NaN	NaN	3.05	35.7	NaN
NaN	NaN	NaN	3.08	36.92	-0.15
NaN	NaN	NaN	3.1	37.3	-0.27
