# Supplementary material for: Deglacial carbon cycle changes observed in a compilation of 117 benthic δ 13 C time series (20–6 ka)
Source: Copernicus journal article supplement (doi:10.5194/cp-2018-25), 2018-03-15
Supplement: Supplementary file 2 [file DI_xyz.xls]

## Sheet: DI_xyz
	Latitude	Longitude	Depth (m)
Orgon4-KS8	23.47	59.19	2900
SO42-74KL	14.32	57.35	3212
