# Supplementary material for: Deglacial carbon cycle changes observed in a compilation of 117 benthic δ 13 C time series (20–6 ka)
Source: Copernicus journal article supplement (doi:10.5194/cp-2018-25), 2018-03-15
Supplement: Supplementary file 3 [file DP_xyz.xls]

## Sheet: DP_xyz
	Latitude	Longitude	Depth (m)
NGC102	32.27	157.85	2612
ODP807A	3.61	156.63	2804
ODP846	-3.1	-90.82	3296
RC13-110	-0.1	-95.65	3231
RC13-114	-1.65	-103.63	3436
V24-109	0.43	158.8	2367
ODP1143	9.36	113.28	2772
