# Supplementary material for: Deglacial carbon cycle changes observed in a compilation of 117 benthic δ 13 C time series (20–6 ka)
Source: Copernicus journal article supplement (doi:10.5194/cp-2018-25), 2018-03-15
Supplement: Supplementary file 4 [file DPac_sites.xls]

## Sheet: DPac_sites
NGC102			ODP807A			ODP846			RC13-110			RC13-114			V24-109			ODP1143
0.03	NaN	-0.35	0.01	NaN	0.37	0.12	2.2632	0.14	0.01	0	0.18	0.01	2.2632	0.33	0	5.3786	0.52	0	0	0.1
0.03	NaN	-0.31	0.04	1.5038	0.262	0.23	7.1936	0.01	0.11	7.7546	0.1	0.01	2.2632	NaN	0.02	6.0919	0.36	0.1	3.3731	0.24
0.03	NaN	0.25	0.06	2.8167	0.137	0.33	10.618	-0.08	0.15	9.5165	0.12	0.045	3.4456	NaN	0.125	9.007	0.51	0.8	18.194	0.12
0.03	NaN	0.21	0.08	4.2687	0.162	0.43	13.201	-0.17	0.21	11.422	0.16	0.085	4.7268	0.35	0.15	9.5663	0.5	0.9	19.263	-0.12
0.03	NaN	0.2	0.11	6.4391	-0.026	0.53	15.476	-0.21	0.24	12.267	-0.05	0.145	6.6536	0.25	0.1501	9.5685	0.4	1.3	22.64	-0.22
0.03	NaN	-0.07	0.13	7.7846	0.036	0.63	17.615	-0.41	0.31	13.805	-0.14	0.19	7.8657	0.16	0.18	10.224	0.28	1.6	24.685	-0.13
0.03	NaN	-0.28	0.15	9.045	-0.107	0.73	19.447	-0.43	0.34	14.399	-0.11	0.24	9.1702	0.28	0.225	11.356	0.28	1.7	25.513	-0.11
0.03	NaN	-0.03	0.17	10.111	-0.079	0.87	21.893	-0.41	0.35	14.605	-0.4	0.29	10.081	0.04	0.25	12.117	0.44	1.8	26.295	-0.19
0.07	3.4503	0.14	0.19	11.129	-0.007	1	23.744	-0.29	0.41	15.816	-0.13	0.35	11.098	0.09	0.2501	12.121	0.18	2	27.951	-0.12
0.07	3.4503	0.17	0.21	12.06	-0.112	1.13	25.353	-0.32	0.44	16.406	-0.25	0.4	12.43	0.06	0.275	13.073	0.26	2.2	29.216	0.06
0.07	3.4503	0.28	0.23	12.965	-0.126	1.23	26.601	-0.44	0.51	17.815	-0.39	0.45	13.883	-0.18	0.3	14.161	0.08	2.3	30.011	0
0.07	3.4503	0.29	0.26	14.281	0.055	1.33	28.099	-0.38	0.54	18.419	-0.17	0.5	15.739	-0.21	0.3001	14.165	0.25	2.4	30.638	-0.07
0.07	3.4503	0.35	0.29	15.805	-0.034	1.45	29.517	-0.33	0.6	19.677	-0.23	0.54	17.217	-0.37	0.325	15.244	0.08	2.5	31.125	0.11
0.07	3.4503	0.3	0.32	17.178	0.146	1.59	31.25	-0.2	0.64	20.694	-0.28	0.59	18.944	-0.24	0.3251	15.248	0.17	2.7	32.561	-0.05
0.07	3.4503	0.14	0.35	18.137	0.047	1.69	32.697	-0.16	0.7	22.137	-0.2	0.64	20.697	-0.28	0.35	16.222	0.19	2.8	33.107	-0.26
0.07	3.4503	-0.16	0.38	18.96	0.085	1.79	33.821	-0.2	0.74	23.228	-0.27	0.64	20.697	-0.28	0.3501	16.226	0.15	2.9	33.677	0.13
0.07	3.4503	0.23	0.42	20.112	0.14	1.87	34.829	-0.18	0.81	25.624	-0.14	0.69	22.296	-0.09	0.375	17.062	0.11	3	34.28	0.17
0.11	10.036	0.1	0.45	21.282	0.194	1.98	36.411	-0.19	0.84	26.705	-0.21	0.69	22.296	-0.24	0.4	17.877	0.03	3.1	34.945	0.24
0.11	10.036	0.18	0.48	22.253	-0.022	2.07	37.957	-0.24	0.91	29.367	-0.03	0.79	25.732	-0.16	0.4001	17.881	-0.03	3.2	35.653	0.03
0.11	10.036	0.22	0.51	23.245	-0.067	2.18	39.366	-0.23	0.94	30.633	-0.13	0.79	25.732	-0.15	0.425	18.731	-0.01	3.3	36.387	-0.22
0.11	10.036	0.14	0.54	24.379	-0.237	2.28	NaN	-0.26	1.01	33.096	-0.04	0.89	29.266	0.17	0.45	19.832	0.05	3.4	37.207	0.07
0.11	10.036	0.02	0.57	25.73	-0.266	2.38	NaN	-0.21	1.11	35.554	0.03	0.99	31.448	-0.01	0.4501	19.836	0.11	3.5	38.12	-0.05
0.11	10.036	0.18	0.6	27.055	-0.215	2.47	NaN	-0.3	1.14	36.303	0	1.09	33.744	0.12	0.475	21.096	0.12	3.6	39.165	-0.03
0.11	10.036	-0.17	0.63	28.565	0.075	2.59	NaN	-0.25	1.21	38.407	-0.09	1.19	36.048	-0.07	0.5	22.198	0.15	3.7	39.563	-0.1
0.15	12.821	-0.28	0.65	29.349	-0.228	2.67	NaN	-0.38	1.24	39.234	0.02	1.29	39.083	0.22	0.525	23.456	0.01	3.8	40.943	0.18
0.15	12.821	-0.18	0.67	30.445	0.085	2.78	NaN	-0.4	1.31	41.555	0.04	1.38	NaN	-0.05	0.55	24.994	0.1	3.9	NaN	-0.26
0.15	12.821	-0.18	0.7	31.332	0.305	2.87	NaN	-0.41	1.34	NaN	-0.03	1.49	NaN	0	0.5501	25.001	0.21	4	NaN	-0.06
0.15	12.821	-0.18	0.72	32.124	0.25	2.96	NaN	-0.53	1.41	NaN	-0.12	1.59	NaN	-0.3	0.575	26.649	0.21	4.1	NaN	-0.2
0.15	12.821	-0.21	0.75	33.219	0.195	3.09	NaN	-0.43	1.44	NaN	-0.15	1.69	NaN	-0.05	0.6	28.517	0.15	4.2	NaN	-0.31
0.15	12.821	-0.18	0.77	33.859	0.188	3.18	NaN	-0.47	1.54	NaN	-0.09	1.79	NaN	-0.41	0.625	30.319	0.17	4.3	NaN	-0.32
0.15	12.821	-0.24	0.8	34.924	-0.006	3.28	NaN	-0.53	1.61	NaN	-0.28	1.91	NaN	-0.47	0.65	31.598	0.2	4.4	NaN	-0.37
0.15	12.821	0.01	0.84	36.581	0.211	3.39	NaN	-0.47	1.71	NaN	-0.61	2.01	NaN	0.1	0.6501	31.603	0.25	4.5	NaN	-0.33
0.19	14.734	-0.09	0.87	38.67	0.096	3.48	NaN	-0.3	1.75	NaN	-0.13	2.1	NaN	0.01	0.675	33.437	0.17	4.6	NaN	-0.27
0.19	14.734	-0.24	0.93	NaN	0.178	3.57	NaN	-0.12	1.81	NaN	-0.26	2.21	NaN	0.29	0.6751	33.443	0.22	4.7	NaN	-0.19
0.19	14.734	-0.35	0.99	NaN	0.171	3.67	NaN	-0.21	1.84	NaN	-0.35	2.29	NaN	0.16	0.7	34.923	0.14	4.8	NaN	-0.39
0.19	14.734	-0.12	1.01	NaN	0.008	3.78	NaN	0.01	1.91	NaN	-0.22	2.39	NaN	-0.12	0.725	36.545	0.92	4.9	NaN	-0.33
0.19	14.734	-0.21	1.03	NaN	-0.043	3.88	NaN	-0.08	1.94	NaN	-0.3	2.49	NaN	0.22	0.75	38.48	0.21	5.2	NaN	-0.42
0.19	14.734	-0.12	1.05	NaN	0.004	3.99	NaN	-0.12	2.01	NaN	0.01	2.59	NaN	0.23	0.775	39.504	0.38	5.3	NaN	-0.63
0.19	14.734	-0.19	1.07	NaN	0.148	4.1	NaN	-0.09	2.06	NaN	0.03	2.69	NaN	0.02	0.8	NaN	0.39	5.4	NaN	0.31
0.23	16.829	-0.18	1.11	NaN	0.146	4.2	NaN	-0.13	2.11	NaN	0.07	2.79	NaN	0.09	0.825	NaN	0.26	5.5	NaN	-0.01
0.23	16.829	-0.39	1.15	NaN	0.164	4.28	NaN	-0.18	2.14	NaN	0.01	2.89	NaN	-0.32	0.8251	NaN	0.33	5.6	NaN	0.18
0.23	16.829	-0.3	1.18	NaN	-0.034	4.37	NaN	-0.01	2.21	NaN	-0.01	2.99	NaN	0.04	0.85	NaN	0.28	5.7	NaN	-0.03
0.23	16.829	-0.07	1.22	NaN	0.097	4.43	NaN	-0.39	2.24	NaN	0.13	3.09	NaN	0.04	0.8501	NaN	0.4	5.8	NaN	0.03
0.23	16.829	-0.19	1.28	NaN	-0.198	4.46	NaN	-0.21	2.41	NaN	-0.29	3.19	NaN	-0.11	0.875	NaN	0.34	5.9	NaN	0
0.23	16.829	-0.11	1.3	NaN	-0.14	4.55	NaN	-0.23	2.51	NaN	-0.14	3.29	NaN	-0.37	0.9	NaN	0.21	6	NaN	0.04
0.23	16.829	-0.23	1.33	NaN	-0.266	4.67	NaN	-0.29	2.54	NaN	-0.17	3.39	NaN	-0.21	0.925	NaN	0.18	6.2	NaN	-0.08
0.23	16.829	-0.3	1.35	NaN	-0.295	4.79	NaN	-0.08	2.61	NaN	-0.13	3.49	NaN	-0.33	0.95	NaN	0.18	6.3	NaN	-0.15
0.27	18.936	-0.15	1.46	NaN	0.126	4.9	NaN	0	2.63	NaN	-0.07	3.59	NaN	-0.42	0.975	NaN	0.24	6.4	NaN	-0.15
0.27	18.936	-0.29	1.47	NaN	-0.352	5.02	NaN	-0.07	2.71	NaN	0.05	3.69	NaN	-0.5	1	NaN	0.01	6.5	NaN	-0.59
0.27	18.936	-0.43	1.48	NaN	-0.382	5.12	NaN	0.22	2.75	NaN	-0.26	3.79	NaN	-0.45	1.025	NaN	0.03	6.6	NaN	-0.11
0.27	18.936	-0.3	1.49	NaN	-0.382	5.22	NaN	0.12	2.81	NaN	-0.01	3.89	NaN	-0.5	1.05	NaN	-0.01	6.7	NaN	-0.13
0.27	18.936	-0.4	1.5	NaN	-0.311	5.32	NaN	-0.02	2.84	NaN	-0.08	3.99	NaN	-0.48	1.075	NaN	0.03	6.8	NaN	-0.01
0.31	21.073	-0.2	1.51	NaN	-0.341	5.42	NaN	-0.2	2.91	NaN	-0.19	NaN	NaN	NaN	1.1	NaN	-0.08	6.9	NaN	-0.33
0.31	21.073	-0.4	1.58	NaN	-0.378	5.52	NaN	-0.27	3.01	NaN	-0.05	NaN	NaN	NaN	1.125	NaN	0.09	7	NaN	-0.01
0.31	21.073	-0.31	1.64	NaN	-0.29	5.62	NaN	-0.33	3.05	NaN	-0.23	NaN	NaN	NaN	1.15	NaN	-0.01	7.1	NaN	-0.28
0.31	21.073	-0.25	1.71	NaN	-0.299	5.72	NaN	-0.4	3.11	NaN	-0.35	NaN	NaN	NaN	1.175	NaN	1.26	7.2	NaN	-0.13
0.31	21.073	-0.31	1.73	NaN	-0.405	5.82	NaN	-0.25	3.14	NaN	-0.41	NaN	NaN	NaN	1.2	NaN	0.26	7.3	NaN	-0.15
0.31	21.073	-0.2	1.76	NaN	-0.552	5.92	NaN	-0.33	3.21	NaN	-0.33	NaN	NaN	NaN	1.225	NaN	0.22	7.4	NaN	-0.05
0.31	21.073	-0.22	1.78	NaN	-0.338	6.02	NaN	-0.43	3.24	NaN	-0.47	NaN	NaN	NaN	1.25	NaN	0.19	7.5	NaN	-0.09
0.35	22.896	-0.46	1.81	NaN	-0.269	6.13	NaN	-0.45	3.31	NaN	-0.55	NaN	NaN	NaN	1.275	NaN	1.13	7.6	NaN	-0.24
0.35	22.896	-0.3	1.83	NaN	-0.406	6.23	NaN	-0.58	3.34	NaN	-0.43	NaN	NaN	NaN	1.3	NaN	0.11	7.7	NaN	-0.21
0.35	22.896	-0.29	1.84	NaN	-0.164	6.33	NaN	-0.45	3.41	NaN	-0.44	NaN	NaN	NaN	1.325	NaN	0.29	8.1	NaN	-0.34
0.35	22.896	-0.25	1.85	NaN	-0.294	6.43	NaN	-0.42	3.44	NaN	-0.37	NaN	NaN	NaN	1.35	NaN	0.31	8.2	NaN	-0.24
0.35	22.896	-0.17	1.86	NaN	-0.301	6.53	NaN	-0.56	3.51	NaN	-0.39	NaN	NaN	NaN	1.375	NaN	0.17	8.4	NaN	-0.33
0.35	22.896	-0.2	1.88	NaN	-0.338	6.63	NaN	-0.5	3.54	NaN	-0.46	NaN	NaN	NaN	1.4	NaN	0.37	8.5	NaN	-0.35
0.35	22.896	-0.23	1.91	NaN	0.014	6.72	NaN	-0.59	3.61	NaN	-0.56	NaN	NaN	NaN	1.425	NaN	0.17	8.8	NaN	-0.05
0.35	22.896	-0.26	1.94	NaN	0.151	6.82	NaN	-0.51	3.64	NaN	-0.54	NaN	NaN	NaN	1.45	NaN	0.18	8.9	NaN	-0.42
0.39	25.095	0.04	1.97	NaN	-0.454	6.91	NaN	-0.33	3.71	NaN	-0.5	NaN	NaN	NaN	1.475	NaN	0.32	9	NaN	-0.56
0.39	25.095	-0.13	2	NaN	-0.095	7	NaN	-0.47	3.74	NaN	-0.38	NaN	NaN	NaN	1.525	NaN	0.4	9.1	NaN	-0.21
0.47	30.359	-0.06	2.02	NaN	0.186	7.09	NaN	-0.4	3.84	NaN	-0.6	NaN	NaN	NaN	1.55	NaN	0.33	9.2	NaN	-0.42
0.47	30.359	-0.18	2.05	NaN	-0.345	7.18	NaN	-0.47	3.91	NaN	-0.46	NaN	NaN	NaN	1.575	NaN	0.22	9.3	NaN	-0.43
0.47	30.359	-0.13	2.11	NaN	-0.052	7.27	NaN	-0.46	3.94	NaN	-0.51	NaN	NaN	NaN	1.6	NaN	0.09	9.4	NaN	-0.09
0.47	30.359	0.06	2.16	NaN	0.157	7.36	NaN	-0.55	4.04	NaN	-0.5	NaN	NaN	NaN	1.625	NaN	0.29	9.5	NaN	-0.4
0.47	30.359	0.09	2.18	NaN	-0.376	7.45	NaN	-0.52	4.14	NaN	-0.46	NaN	NaN	NaN	1.65	NaN	0.21	9.6	NaN	-0.14
0.56	35.771	-0.07	2.2	NaN	-0.299	7.53	NaN	-0.51	4.21	NaN	-0.42	NaN	NaN	NaN	1.675	NaN	0.24	9.9	NaN	-0.56
0.56	35.771	-0.07	2.22	NaN	-0.312	7.62	NaN	-0.56	4.24	NaN	-0.51	NaN	NaN	NaN	1.7	NaN	0.23	10.2	NaN	0.22
0.56	35.771	-0.12	2.24	NaN	-0.373	7.71	NaN	-0.43	4.31	NaN	-0.45	NaN	NaN	NaN	1.725	NaN	0.18	10.3	NaN	-0.55
0.56	35.771	-0.17	2.26	NaN	-0.159	7.79	NaN	-0.39	4.34	NaN	0.02	NaN	NaN	NaN	1.75	NaN	0.13	10.4	NaN	-0.55
0.56	35.771	-0.16	2.28	NaN	-0.203	7.88	NaN	-0.33	4.41	NaN	-0.11	NaN	NaN	NaN	1.775	NaN	0.22	10.5	NaN	-0.1
0.56	35.771	-0.12	2.3	NaN	-0.032	7.95	NaN	-0.27	4.43	NaN	-0.05	NaN	NaN	NaN	1.8	NaN	0.17	10.6	NaN	0.08
0.63	NaN	-0.07	2.32	NaN	0.047	8.03	NaN	-0.32	4.51	NaN	-0.1	NaN	NaN	NaN	1.825	NaN	0.23	10.7	NaN	-0.45
0.63	NaN	-0.13	2.34	NaN	-0.181	8.1	NaN	-0.51	4.61	NaN	0.02	NaN	NaN	NaN	1.85	NaN	0.15	10.8	NaN	-0.5
0.63	NaN	-0.15	2.36	NaN	0.09	8.18	NaN	-0.1	4.64	NaN	-0.12	NaN	NaN	NaN	1.875	NaN	0.3	10.9	NaN	-0.21
0.63	NaN	-0.16	2.38	NaN	-0.161	8.26	NaN	-0.17	4.71	NaN	-0.28	NaN	NaN	NaN	1.9	NaN	0.16	11	NaN	-0.55
0.63	NaN	-0.09	2.43	NaN	-0.073	8.34	NaN	-0.04	4.75	NaN	-0.15	NaN	NaN	NaN	1.925	NaN	0.17	11.1	NaN	-0.23
0.63	NaN	-0.1	2.49	NaN	-0.232	8.42	NaN	-0.02	4.81	NaN	-0.24	NaN	NaN	NaN	1.95	NaN	0.22	11.2	NaN	-0.53
0.63	NaN	-0.25	2.51	NaN	-0.368	8.5	NaN	-0.27	4.85	NaN	-0.3	NaN	NaN	NaN	1.975	NaN	0.27	11.3	NaN	-0.54
0.63	NaN	-0.09	2.52	NaN	-0.285	8.59	NaN	-0.26	4.91	NaN	-0.22	NaN	NaN	NaN	2	NaN	0.24	11.4	NaN	-0.17
0.63	NaN	-0.07	2.54	NaN	-0.296	8.68	NaN	-0.48	4.94	NaN	-0.52	NaN	NaN	NaN	2.025	NaN	0.92	11.5	NaN	-0.45
0.63	NaN	-0.19	2.57	NaN	-0.318	8.77	NaN	-0.46	5.01	NaN	-0.46	NaN	NaN	NaN	2.075	NaN	0.44	11.7	NaN	-0.46
0.71	NaN	-0.16	2.63	NaN	-0.516	8.87	NaN	-0.49	5.04	NaN	-0.64	NaN	NaN	NaN	2.0751	NaN	-0.09	11.8	NaN	-0.1
0.71	NaN	-0.09	2.69	NaN	-0.538	8.98	NaN	-0.48	5.11	NaN	-0.47	NaN	NaN	NaN	2.1	NaN	0.16	11.82	NaN	0.22
0.71	NaN	-0.2	2.81	NaN	-0.351	9.08	NaN	-0.49	5.14	NaN	-0.22	NaN	NaN	NaN	2.1001	NaN	0.02	11.92	NaN	0.58
0.71	NaN	0.08	2.82	NaN	-0.547	9.19	NaN	-0.47	5.21	NaN	-0.29	NaN	NaN	NaN	2.125	NaN	0.09	12.02	NaN	-0.03
0.71	NaN	-0.22	2.83	NaN	-0.002	9.29	NaN	-0.33	5.24	NaN	-0.18	NaN	NaN	NaN	2.15	NaN	-0.1	12.12	NaN	-0.04
0.71	NaN	-0.17	2.85	NaN	-0.113	9.4	NaN	-0.32	5.31	NaN	-0.08	NaN	NaN	NaN	2.175	NaN	-0.09	12.22	NaN	-0.05
0.71	NaN	-0.31	2.86	NaN	-0.106	9.49	NaN	-0.27	5.34	NaN	0.03	NaN	NaN	NaN	2.2	NaN	-0.16	12.32	NaN	-0.08
0.71	NaN	-0.1	2.87	NaN	-0.044	9.58	NaN	-0.49	5.41	NaN	-0.13	NaN	NaN	NaN	2.225	NaN	-0.17	12.42	NaN	0.14
0.71	NaN	-0.08	2.89	NaN	0.042	9.68	NaN	-0.46	5.44	NaN	-0.22	NaN	NaN	NaN	2.25	NaN	0.05	12.82	NaN	-0.19
0.71	NaN	0.09	2.9	NaN	-0.184	9.78	NaN	-0.69	5.51	NaN	-0.41	NaN	NaN	NaN	2.275	NaN	-0.06	12.92	NaN	-0.39
0.79	NaN	0	2.92	NaN	0.05	9.87	NaN	-0.56	5.55	NaN	-0.39	NaN	NaN	NaN	2.3	NaN	-0.28	13.02	NaN	0.08
0.79	NaN	-0.28	2.93	NaN	-0.123	9.96	NaN	-0.65	5.61	NaN	-0.61	NaN	NaN	NaN	2.325	NaN	-0.27	13.22	NaN	-0.54
0.79	NaN	-0.16	2.95	NaN	0.107	10.06	NaN	-0.62	5.65	NaN	-0.42	NaN	NaN	NaN	2.35	NaN	-0.26	13.42	NaN	-0.07
0.79	NaN	-0.09	2.96	NaN	-0.275	10.16	NaN	-0.83	5.71	NaN	-0.56	NaN	NaN	NaN	2.375	NaN	-0.07	13.52	NaN	-0.15
0.79	NaN	-0.4	2.98	NaN	-0.097	10.27	NaN	-0.89	5.75	NaN	-0.43	NaN	NaN	NaN	2.4	NaN	-0.2	13.62	NaN	-0.05
0.79	NaN	-0.02	2.99	NaN	-0.257	10.38	NaN	-0.82	5.81	NaN	-0.64	NaN	NaN	NaN	2.425	NaN	-0.18	13.92	NaN	-0.53
0.79	NaN	-0.23	3.03	NaN	-0.108	10.5	NaN	-0.92	5.85	NaN	-0.81	NaN	NaN	NaN	2.45	NaN	-0.19	14.12	NaN	-0.14
0.79	NaN	-0.09	3.05	NaN	-0.088	10.55	NaN	-0.82	5.91	NaN	-0.76	NaN	NaN	NaN	2.475	NaN	-0.22	14.22	NaN	-0.22
0.79	NaN	-0.16	3.08	NaN	-0.136	10.61	NaN	-0.64	5.94	NaN	-0.64	NaN	NaN	NaN	2.5	NaN	-0.17	14.32	NaN	-0.45
0.79	NaN	-0.29	3.12	NaN	-0.017	10.71	NaN	-0.55	6.01	NaN	-0.63	NaN	NaN	NaN	2.525	NaN	-0.14	14.52	NaN	-0.36
0.87	NaN	-0.21	3.15	NaN	0.296	10.73	NaN	-0.76	6.05	NaN	-0.71	NaN	NaN	NaN	2.55	NaN	-0.24	14.72	NaN	0.03
0.87	NaN	-0.44	3.18	NaN	-0.138	10.84	NaN	-0.54	6.11	NaN	-0.1	NaN	NaN	NaN	2.575	NaN	-0.15	14.82	NaN	-0.47
0.87	NaN	-0.21	3.22	NaN	0.139	10.91	NaN	-0.5	6.21	NaN	-0.3	NaN	NaN	NaN	2.6	NaN	0.08	14.92	NaN	-0.57
0.87	NaN	-0.39	3.25	NaN	-0.051	10.94	NaN	-0.65	6.31	NaN	-0.36	NaN	NaN	NaN	2.65	NaN	-0.28	15.02	NaN	-0.33
0.87	NaN	-0.37	3.29	NaN	-0.02	11.03	NaN	-0.35	6.33	NaN	-0.17	NaN	NaN	NaN	2.675	NaN	-0.14	15.12	NaN	0.01
0.87	NaN	-0.17	3.32	NaN	-0.001	11.12	NaN	-0.44	6.41	NaN	-0.31	NaN	NaN	NaN	2.7	NaN	-0.22	15.22	NaN	-0.13
0.87	NaN	-0.29	3.36	NaN	-0.233	11.2	NaN	-0.28	6.45	NaN	-0.36	NaN	NaN	NaN	2.725	NaN	-0.07	15.32	NaN	-0.08
0.91	NaN	-0.14	3.41	NaN	-0.274	11.23	NaN	-0.1	6.51	NaN	-0.27	NaN	NaN	NaN	NaN	NaN	NaN	15.62	NaN	-0.31
0.91	NaN	-0.08	3.43	NaN	-0.249	11.28	NaN	-0.48	6.53	NaN	-0.23	NaN	NaN	NaN	NaN	NaN	NaN	15.72	NaN	-0.43
0.91	NaN	0.06	3.44	NaN	-0.363	11.32	NaN	-0.39	6.61	NaN	-0.01	NaN	NaN	NaN	NaN	NaN	NaN	15.82	NaN	-0.26
0.91	NaN	-0.05	3.46	NaN	-0.256	11.36	NaN	-0.46	6.65	NaN	-0.17	NaN	NaN	NaN	NaN	NaN	NaN	15.92	NaN	-0.13
0.91	NaN	0.25	3.47	NaN	-0.348	11.41	NaN	-0.37	6.75	NaN	-0.21	NaN	NaN	NaN	NaN	NaN	NaN	16.02	NaN	-0.43
0.91	NaN	0.36	3.49	NaN	-0.343	11.49	NaN	-0.53	6.81	NaN	-0.03	NaN	NaN	NaN	NaN	NaN	NaN	16.22	NaN	-0.45
0.91	NaN	0.05	3.5	NaN	-0.505	11.59	NaN	-0.54	6.85	NaN	-0.11	NaN	NaN	NaN	NaN	NaN	NaN	16.41	NaN	-0.35
0.91	NaN	-0.23	3.52	NaN	-0.34	11.71	NaN	-0.38	6.91	NaN	0.13	NaN	NaN	NaN	NaN	NaN	NaN	16.5	NaN	-0.42
0.91	NaN	0.16	3.53	NaN	-0.437	11.8	NaN	-0.47	6.94	NaN	-0.14	NaN	NaN	NaN	NaN	NaN	NaN	16.6	NaN	-0.43
0.91	NaN	-0.04	3.55	NaN	-0.384	11.87	NaN	-0.48	7.01	NaN	0.14	NaN	NaN	NaN	NaN	NaN	NaN	16.7	NaN	-0.47
0.99	NaN	0.28	3.57	NaN	-0.211	11.94	NaN	-0.36	7.05	NaN	-0.34	NaN	NaN	NaN	NaN	NaN	NaN	16.9	NaN	-0.51
0.99	NaN	0.19	3.58	NaN	-0.394	12.03	NaN	-0.41	7.11	NaN	-0.27	NaN	NaN	NaN	NaN	NaN	NaN	17	NaN	-0.62
0.99	NaN	0.29	3.6	NaN	-0.23	12.09	NaN	-0.61	7.15	NaN	-0.36	NaN	NaN	NaN	NaN	NaN	NaN	17.1	NaN	-0.57
0.99	NaN	0.22	3.61	NaN	-0.31	12.2	NaN	-0.48	7.21	NaN	-0.45	NaN	NaN	NaN	NaN	NaN	NaN	17.3	NaN	-0.58
0.99	NaN	0.21	3.64	NaN	0.076	12.33	NaN	-0.46	7.25	NaN	-0.4	NaN	NaN	NaN	NaN	NaN	NaN	17.4	NaN	-0.19
0.99	NaN	0.1	3.68	NaN	-0.065	12.38	NaN	-0.34	7.31	NaN	-0.54	NaN	NaN	NaN	NaN	NaN	NaN	17.5	NaN	-0.51
0.99	NaN	-0.05	3.7	NaN	0.01	12.43	NaN	-0.39	7.34	NaN	-0.68	NaN	NaN	NaN	NaN	NaN	NaN	17.6	NaN	-0.54
0.99	NaN	0.12	3.73	NaN	-0.039	12.51	NaN	-0.5	7.41	NaN	-0.52	NaN	NaN	NaN	NaN	NaN	NaN	17.8	NaN	-0.87
0.99	NaN	0.18	3.75	NaN	-0.002	12.53	NaN	-0.43	7.45	NaN	-0.54	NaN	NaN	NaN	NaN	NaN	NaN	17.9	NaN	-0.62
1.07	NaN	-0.3	3.81	NaN	0.23	12.62	NaN	-0.22	7.51	NaN	-0.48	NaN	NaN	NaN	NaN	NaN	NaN	18.1	NaN	-0.24
1.07	NaN	-0.08	3.87	NaN	-0.106	12.64	NaN	-0.28	7.61	NaN	-0.57	NaN	NaN	NaN	NaN	NaN	NaN	18.2	NaN	-0.14
1.07	NaN	0.08	3.93	NaN	0.229	12.71	NaN	-0.27	7.63	NaN	-0.59	NaN	NaN	NaN	NaN	NaN	NaN	18.3	NaN	-0.15
1.07	NaN	0.02	3.99	NaN	0.245	12.79	NaN	-0.3	7.71	NaN	-0.46	NaN	NaN	NaN	NaN	NaN	NaN	18.5	NaN	0.37
1.07	NaN	-0.24	4.05	NaN	0.317	12.81	NaN	-0.45	7.75	NaN	-0.54	NaN	NaN	NaN	NaN	NaN	NaN	18.6	NaN	-0.2
1.07	NaN	-0.03	4.1	NaN	-0.037	12.97	NaN	-0.28	7.81	NaN	-0.58	NaN	NaN	NaN	NaN	NaN	NaN	18.7	NaN	-0.38
1.07	NaN	0.02	4.15	NaN	0.208	13.05	NaN	-0.47	7.85	NaN	-0.22	NaN	NaN	NaN	NaN	NaN	NaN	18.8	NaN	-0.39
1.07	NaN	-0.15	4.2	NaN	-0.121	13.18	NaN	-0.67	7.91	NaN	-0.22	NaN	NaN	NaN	NaN	NaN	NaN	18.9	NaN	-0.46
1.07	NaN	-0.17	4.34	NaN	-0.305	13.2	NaN	-0.51	7.94	NaN	-0.37	NaN	NaN	NaN	NaN	NaN	NaN	19	NaN	-0.6
1.15	NaN	-0.29	4.74	NaN	-0.145	13.27	NaN	-0.63	8.01	NaN	-0.31	NaN	NaN	NaN	NaN	NaN	NaN	19.1	NaN	-0.52
1.15	NaN	0.09	4.75	NaN	-0.382	13.29	NaN	-0.51	8.05	NaN	0.16	NaN	NaN	NaN	NaN	NaN	NaN	19.2	NaN	-0.48
1.15	NaN	-0.08	4.76	NaN	-0.342	13.33	NaN	-0.65	8.11	NaN	-0.17	NaN	NaN	NaN	NaN	NaN	NaN	19.3	NaN	-0.43
1.15	NaN	0.1	4.77	NaN	-0.206	13.37	NaN	-0.53	8.14	NaN	0.15	NaN	NaN	NaN	NaN	NaN	NaN	19.4	NaN	-0.44
1.15	NaN	0.06	4.78	NaN	0.139	13.39	NaN	-0.52	8.21	NaN	-0.14	NaN	NaN	NaN	NaN	NaN	NaN	19.5	NaN	-0.41
1.15	NaN	0.18	4.8	NaN	0.315	13.46	NaN	-0.53	8.25	NaN	0.04	NaN	NaN	NaN	NaN	NaN	NaN	19.6	NaN	-0.48
1.15	NaN	-0.25	4.86	NaN	-0.077	13.54	NaN	-0.58	8.31	NaN	-0.04	NaN	NaN	NaN	NaN	NaN	NaN	19.7	NaN	-0.44
1.15	NaN	0.14	4.91	NaN	0.428	13.56	NaN	-0.36	8.35	NaN	0.27	NaN	NaN	NaN	NaN	NaN	NaN	19.8	NaN	-0.19
1.15	NaN	-0.13	4.97	NaN	0.321	13.67	NaN	-0.58	8.41	NaN	0.43	NaN	NaN	NaN	NaN	NaN	NaN	19.9	NaN	-0.28
1.23	NaN	0.12	5.02	NaN	0.28	13.77	NaN	-0.67	8.45	NaN	0.29	NaN	NaN	NaN	NaN	NaN	NaN	20	NaN	-0.24
1.23	NaN	0.02	5.08	NaN	0.268	13.85	NaN	-0.69	8.51	NaN	0.22	NaN	NaN	NaN	NaN	NaN	NaN	20.1	NaN	-0.36
1.23	NaN	-0.45	5.13	NaN	0.456	13.91	NaN	-0.72	8.54	NaN	0.45	NaN	NaN	NaN	NaN	NaN	NaN	20.2	NaN	-0.37
1.23	NaN	-0.27	5.17	NaN	0.274	13.96	NaN	-0.6	8.61	NaN	0.22	NaN	NaN	NaN	NaN	NaN	NaN	20.5	NaN	-0.21
1.23	NaN	-0.02	5.2	NaN	0.221	14.02	NaN	-0.46	8.64	NaN	0.1	NaN	NaN	NaN	NaN	NaN	NaN	20.6	NaN	0.03
1.23	NaN	0.12	5.21	NaN	-0.09	14.08	NaN	-0.56	8.71	NaN	0.31	NaN	NaN	NaN	NaN	NaN	NaN	20.7	NaN	-0.22
1.23	NaN	-0.21	5.22	NaN	0.15	14.18	NaN	-0.44	8.73	NaN	-0.2	NaN	NaN	NaN	NaN	NaN	NaN	20.8	NaN	-0.25
1.23	NaN	-0.08	5.23	NaN	0.196	14.32	NaN	-0.25	8.81	NaN	-0.13	NaN	NaN	NaN	NaN	NaN	NaN	20.9	NaN	-0.29
1.31	NaN	-0.56	5.24	NaN	0.161	14.46	NaN	-0.54	8.91	NaN	-0.21	NaN	NaN	NaN	NaN	NaN	NaN	21	NaN	-0.36
1.31	NaN	-0.27	5.38	NaN	-0.168	14.59	NaN	-0.34	8.94	NaN	-0.42	NaN	NaN	NaN	NaN	NaN	NaN	21.8	NaN	-0.48
1.31	NaN	-0.05	5.52	NaN	-0.164	14.69	NaN	-0.19	9.01	NaN	-0.32	NaN	NaN	NaN	NaN	NaN	NaN	22	NaN	-0.53
1.31	NaN	-0.42	NaN	NaN	NaN	14.77	NaN	-0.13	9.05	NaN	-0.4	NaN	NaN	NaN	NaN	NaN	NaN	22.32	NaN	-0.22
1.31	NaN	-0.41	NaN	NaN	NaN	14.86	NaN	-0.26	9.11	NaN	-0.21	NaN	NaN	NaN	NaN	NaN	NaN	22.42	NaN	-0.57
1.31	NaN	-0.5	NaN	NaN	NaN	14.95	NaN	-0.22	9.14	NaN	-0.26	NaN	NaN	NaN	NaN	NaN	NaN	22.52	NaN	-0.61
1.31	NaN	-0.39	NaN	NaN	NaN	15.06	NaN	-0.27	9.21	NaN	-0.34	NaN	NaN	NaN	NaN	NaN	NaN	22.62	NaN	-0.54
1.31	NaN	-0.42	NaN	NaN	NaN	15.18	NaN	0.08	9.24	NaN	-0.13	NaN	NaN	NaN	NaN	NaN	NaN	22.72	NaN	-0.49
NaN	NaN	NaN	NaN	NaN	NaN	15.33	NaN	0.04	9.31	NaN	-0.24	NaN	NaN	NaN	NaN	NaN	NaN	22.92	NaN	-0.09
NaN	NaN	NaN	NaN	NaN	NaN	15.42	NaN	-0.17	9.34	NaN	-0.06	NaN	NaN	NaN	NaN	NaN	NaN	23.02	NaN	-0.39
NaN	NaN	NaN	NaN	NaN	NaN	15.47	NaN	0.19	9.41	NaN	-0.41	NaN	NaN	NaN	NaN	NaN	NaN	23.12	NaN	0.06
NaN	NaN	NaN	NaN	NaN	NaN	15.52	NaN	0.12	9.45	NaN	-0.3	NaN	NaN	NaN	NaN	NaN	NaN	23.22	NaN	-0.22
NaN	NaN	NaN	NaN	NaN	NaN	15.6	NaN	0.03	9.51	NaN	-0.25	NaN	NaN	NaN	NaN	NaN	NaN	23.32	NaN	-0.3
NaN	NaN	NaN	NaN	NaN	NaN	15.63	NaN	0	9.54	NaN	-0.48	NaN	NaN	NaN	NaN	NaN	NaN	23.42	NaN	-0.36
NaN	NaN	NaN	NaN	NaN	NaN	15.74	NaN	0.04	9.61	NaN	-0.54	NaN	NaN	NaN	NaN	NaN	NaN	23.52	NaN	-0.25
NaN	NaN	NaN	NaN	NaN	NaN	15.85	NaN	-0.04	9.65	NaN	-0.27	NaN	NaN	NaN	NaN	NaN	NaN	23.66	NaN	0.1
NaN	NaN	NaN	NaN	NaN	NaN	15.95	NaN	-0.01	9.71	NaN	-0.07	NaN	NaN	NaN	NaN	NaN	NaN	23.76	NaN	-0.31
NaN	NaN	NaN	NaN	NaN	NaN	16.06	NaN	0.01	9.75	NaN	-0.41	NaN	NaN	NaN	NaN	NaN	NaN	23.86	NaN	-0.24
NaN	NaN	NaN	NaN	NaN	NaN	16.17	NaN	-0.25	9.81	NaN	-0.22	NaN	NaN	NaN	NaN	NaN	NaN	23.96	NaN	0.25
NaN	NaN	NaN	NaN	NaN	NaN	16.27	NaN	-0.34	9.85	NaN	-0.27	NaN	NaN	NaN	NaN	NaN	NaN	24.06	NaN	0.12
NaN	NaN	NaN	NaN	NaN	NaN	16.41	NaN	-0.46	9.91	NaN	-0.3	NaN	NaN	NaN	NaN	NaN	NaN	24.16	NaN	-0.12
NaN	NaN	NaN	NaN	NaN	NaN	16.51	NaN	-0.47	9.95	NaN	-0.26	NaN	NaN	NaN	NaN	NaN	NaN	24.26	NaN	0.12
NaN	NaN	NaN	NaN	NaN	NaN	16.61	NaN	-0.5	10.01	NaN	-0.09	NaN	NaN	NaN	NaN	NaN	NaN	24.36	NaN	0.25
NaN	NaN	NaN	NaN	NaN	NaN	16.71	NaN	-0.36	10.05	NaN	-0.09	NaN	NaN	NaN	NaN	NaN	NaN	24.66	NaN	0.18
NaN	NaN	NaN	NaN	NaN	NaN	16.82	NaN	-0.36	10.11	NaN	0.11	NaN	NaN	NaN	NaN	NaN	NaN	24.76	NaN	-0.05
NaN	NaN	NaN	NaN	NaN	NaN	16.92	NaN	-0.41	10.15	NaN	0.1	NaN	NaN	NaN	NaN	NaN	NaN	24.86	NaN	0.13
NaN	NaN	NaN	NaN	NaN	NaN	17.02	NaN	-0.24	10.25	NaN	0.14	NaN	NaN	NaN	NaN	NaN	NaN	24.96	NaN	0.12
NaN	NaN	NaN	NaN	NaN	NaN	17.11	NaN	-0.4	10.31	NaN	0.36	NaN	NaN	NaN	NaN	NaN	NaN	25.06	NaN	0.03
NaN	NaN	NaN	NaN	NaN	NaN	17.31	NaN	-0.4	10.35	NaN	0.53	NaN	NaN	NaN	NaN	NaN	NaN	25.12	NaN	-0.09
NaN	NaN	NaN	NaN	NaN	NaN	17.41	NaN	-0.45	10.41	NaN	0.32	NaN	NaN	NaN	NaN	NaN	NaN	25.22	NaN	-0.15
NaN	NaN	NaN	NaN	NaN	NaN	17.51	NaN	-0.58	10.51	NaN	0.29	NaN	NaN	NaN	NaN	NaN	NaN	25.32	NaN	-0.14
NaN	NaN	NaN	NaN	NaN	NaN	17.61	NaN	-0.46	10.54	NaN	0.3	NaN	NaN	NaN	NaN	NaN	NaN	25.42	NaN	-0.28
NaN	NaN	NaN	NaN	NaN	NaN	17.71	NaN	-0.35	10.61	NaN	0.06	NaN	NaN	NaN	NaN	NaN	NaN	25.52	NaN	-0.37
NaN	NaN	NaN	NaN	NaN	NaN	17.9	NaN	-0.35	10.65	NaN	0.42	NaN	NaN	NaN	NaN	NaN	NaN	25.62	NaN	-0.54
NaN	NaN	NaN	NaN	NaN	NaN	17.93	NaN	-0.44	10.71	NaN	0.32	NaN	NaN	NaN	NaN	NaN	NaN	25.72	NaN	-0.52
NaN	NaN	NaN	NaN	NaN	NaN	18	NaN	-0.46	10.75	NaN	0.1	NaN	NaN	NaN	NaN	NaN	NaN	25.82	NaN	-0.55
NaN	NaN	NaN	NaN	NaN	NaN	18.03	NaN	-0.44	10.81	NaN	0.17	NaN	NaN	NaN	NaN	NaN	NaN	25.92	NaN	-0.58
NaN	NaN	NaN	NaN	NaN	NaN	18.1	NaN	-0.39	10.85	NaN	0.4	NaN	NaN	NaN	NaN	NaN	NaN	26.02	NaN	-0.49
NaN	NaN	NaN	NaN	NaN	NaN	18.2	NaN	-0.42	10.91	NaN	0.1	NaN	NaN	NaN	NaN	NaN	NaN	26.32	NaN	-0.49
NaN	NaN	NaN	NaN	NaN	NaN	18.3	NaN	-0.45	10.95	NaN	-0.01	NaN	NaN	NaN	NaN	NaN	NaN	26.52	NaN	-0.46
NaN	NaN	NaN	NaN	NaN	NaN	18.41	NaN	-0.39	11.01	NaN	0.05	NaN	NaN	NaN	NaN	NaN	NaN	26.62	NaN	-0.39
NaN	NaN	NaN	NaN	NaN	NaN	18.51	NaN	-0.37	11.11	NaN	-0.13	NaN	NaN	NaN	NaN	NaN	NaN	26.76	NaN	-0.48
NaN	NaN	NaN	NaN	NaN	NaN	18.61	NaN	-0.22	11.14	NaN	-0.14	NaN	NaN	NaN	NaN	NaN	NaN	26.86	NaN	-0.62
NaN	NaN	NaN	NaN	NaN	NaN	18.71	NaN	-0.08	11.21	NaN	-0.27	NaN	NaN	NaN	NaN	NaN	NaN	26.96	NaN	-0.5
NaN	NaN	NaN	NaN	NaN	NaN	18.81	NaN	-0.12	11.25	NaN	-0.03	NaN	NaN	NaN	NaN	NaN	NaN	27.06	NaN	-0.64
NaN	NaN	NaN	NaN	NaN	NaN	18.91	NaN	0.1	11.34	NaN	-0.23	NaN	NaN	NaN	NaN	NaN	NaN	27.16	NaN	-0.66
NaN	NaN	NaN	NaN	NaN	NaN	19.05	NaN	0.16	11.41	NaN	-0.11	NaN	NaN	NaN	NaN	NaN	NaN	27.26	NaN	-0.55
NaN	NaN	NaN	NaN	NaN	NaN	19.15	NaN	0.25	11.45	NaN	-0.09	NaN	NaN	NaN	NaN	NaN	NaN	27.36	NaN	-0.6
NaN	NaN	NaN	NaN	NaN	NaN	19.25	NaN	0.23	11.55	NaN	-0.04	NaN	NaN	NaN	NaN	NaN	NaN	27.46	NaN	-0.57
NaN	NaN	NaN	NaN	NaN	NaN	19.35	NaN	-0.24	11.61	NaN	-0.03	NaN	NaN	NaN	NaN	NaN	NaN	27.56	NaN	-0.46
NaN	NaN	NaN	NaN	NaN	NaN	19.45	NaN	0.11	11.65	NaN	-0.31	NaN	NaN	NaN	NaN	NaN	NaN	27.66	NaN	-0.51
NaN	NaN	NaN	NaN	NaN	NaN	19.55	NaN	0.13	11.71	NaN	-0.21	NaN	NaN	NaN	NaN	NaN	NaN	27.76	NaN	-0.51
NaN	NaN	NaN	NaN	NaN	NaN	19.65	NaN	-0.01	11.81	NaN	-0.04	NaN	NaN	NaN	NaN	NaN	NaN	27.96	NaN	-0.77
NaN	NaN	NaN	NaN	NaN	NaN	19.75	NaN	0.19	11.85	NaN	-0.14	NaN	NaN	NaN	NaN	NaN	NaN	28.56	NaN	0.01
NaN	NaN	NaN	NaN	NaN	NaN	19.85	NaN	0.16	11.91	NaN	0.02	NaN	NaN	NaN	NaN	NaN	NaN	28.66	NaN	0.2
NaN	NaN	NaN	NaN	NaN	NaN	19.95	NaN	0.22	11.94	NaN	-0.07	NaN	NaN	NaN	NaN	NaN	NaN	28.76	NaN	0.2
NaN	NaN	NaN	NaN	NaN	NaN	20.05	NaN	0.29	12.01	NaN	0.06	NaN	NaN	NaN	NaN	NaN	NaN	28.86	NaN	0.24
NaN	NaN	NaN	NaN	NaN	NaN	20.15	NaN	0.25	12.05	NaN	0	NaN	NaN	NaN	NaN	NaN	NaN	28.96	NaN	0.06
NaN	NaN	NaN	NaN	NaN	NaN	20.25	NaN	0.2	12.1	NaN	0.15	NaN	NaN	NaN	NaN	NaN	NaN	29.26	NaN	0.17
NaN	NaN	NaN	NaN	NaN	NaN	20.27	NaN	0.13	12.14	NaN	0.14	NaN	NaN	NaN	NaN	NaN	NaN	29.46	NaN	-0.26
NaN	NaN	NaN	NaN	NaN	NaN	20.35	NaN	0.07	12.2	NaN	0.23	NaN	NaN	NaN	NaN	NaN	NaN	29.66	NaN	0.07
NaN	NaN	NaN	NaN	NaN	NaN	20.43	NaN	-0.07	NaN	NaN	NaN	NaN	NaN	NaN	NaN	NaN	NaN	29.76	NaN	-0.07
NaN	NaN	NaN	NaN	NaN	NaN	20.51	NaN	-0.13	NaN	NaN	NaN	NaN	NaN	NaN	NaN	NaN	NaN	30.06	NaN	0.11
NaN	NaN	NaN	NaN	NaN	NaN	20.61	NaN	-0.33	NaN	NaN	NaN	NaN	NaN	NaN	NaN	NaN	NaN	30.26	NaN	0.27
NaN	NaN	NaN	NaN	NaN	NaN	20.7	NaN	-0.34	NaN	NaN	NaN	NaN	NaN	NaN	NaN	NaN	NaN	30.36	NaN	0.18
NaN	NaN	NaN	NaN	NaN	NaN	20.81	NaN	-0.28	NaN	NaN	NaN	NaN	NaN	NaN	NaN	NaN	NaN	30.46	NaN	0.27
NaN	NaN	NaN	NaN	NaN	NaN	20.91	NaN	-0.31	NaN	NaN	NaN	NaN	NaN	NaN	NaN	NaN	NaN	30.56	NaN	-0.04
NaN	NaN	NaN	NaN	NaN	NaN	21.06	NaN	-0.34	NaN	NaN	NaN	NaN	NaN	NaN	NaN	NaN	NaN	30.66	NaN	0
NaN	NaN	NaN	NaN	NaN	NaN	21.21	NaN	-0.3	NaN	NaN	NaN	NaN	NaN	NaN	NaN	NaN	NaN	30.76	NaN	-0.09
NaN	NaN	NaN	NaN	NaN	NaN	21.37	NaN	-0.5	NaN	NaN	NaN	NaN	NaN	NaN	NaN	NaN	NaN	30.86	NaN	-0.45
NaN	NaN	NaN	NaN	NaN	NaN	21.46	NaN	-0.36	NaN	NaN	NaN	NaN	NaN	NaN	NaN	NaN	NaN	30.96	NaN	-0.14
NaN	NaN	NaN	NaN	NaN	NaN	21.56	NaN	-0.39	NaN	NaN	NaN	NaN	NaN	NaN	NaN	NaN	NaN	31.06	NaN	-0.18
NaN	NaN	NaN	NaN	NaN	NaN	21.62	NaN	-0.34	NaN	NaN	NaN	NaN	NaN	NaN	NaN	NaN	NaN	31.16	NaN	-0.1
NaN	NaN	NaN	NaN	NaN	NaN	21.68	NaN	-0.22	NaN	NaN	NaN	NaN	NaN	NaN	NaN	NaN	NaN	31.26	NaN	-0.36
NaN	NaN	NaN	NaN	NaN	NaN	21.76	NaN	-0.23	NaN	NaN	NaN	NaN	NaN	NaN	NaN	NaN	NaN	31.36	NaN	-0.17
NaN	NaN	NaN	NaN	NaN	NaN	21.83	NaN	-0.15	NaN	NaN	NaN	NaN	NaN	NaN	NaN	NaN	NaN	31.46	NaN	-0.33
NaN	NaN	NaN	NaN	NaN	NaN	21.9	NaN	0.05	NaN	NaN	NaN	NaN	NaN	NaN	NaN	NaN	NaN	31.56	NaN	-0.42
NaN	NaN	NaN	NaN	NaN	NaN	22.01	NaN	-0.02	NaN	NaN	NaN	NaN	NaN	NaN	NaN	NaN	NaN	31.66	NaN	0.01
NaN	NaN	NaN	NaN	NaN	NaN	22.15	NaN	-0.2	NaN	NaN	NaN	NaN	NaN	NaN	NaN	NaN	NaN	31.76	NaN	-0.36
NaN	NaN	NaN	NaN	NaN	NaN	22.28	NaN	-0.3	NaN	NaN	NaN	NaN	NaN	NaN	NaN	NaN	NaN	31.86	NaN	-0.28
NaN	NaN	NaN	NaN	NaN	NaN	22.41	NaN	-0.38	NaN	NaN	NaN	NaN	NaN	NaN	NaN	NaN	NaN	31.96	NaN	-0.35
NaN	NaN	NaN	NaN	NaN	NaN	22.5	NaN	-0.17	NaN	NaN	NaN	NaN	NaN	NaN	NaN	NaN	NaN	32.16	NaN	-0.32
NaN	NaN	NaN	NaN	NaN	NaN	22.6	NaN	-0.21	NaN	NaN	NaN	NaN	NaN	NaN	NaN	NaN	NaN	32.26	NaN	-0.05
NaN	NaN	NaN	NaN	NaN	NaN	22.7	NaN	-0.12	NaN	NaN	NaN	NaN	NaN	NaN	NaN	NaN	NaN	32.46	NaN	-0.31
NaN	NaN	NaN	NaN	NaN	NaN	22.78	NaN	-0.06	NaN	NaN	NaN	NaN	NaN	NaN	NaN	NaN	NaN	32.66	NaN	-0.22
NaN	NaN	NaN	NaN	NaN	NaN	22.87	NaN	-0.02	NaN	NaN	NaN	NaN	NaN	NaN	NaN	NaN	NaN	32.76	NaN	0.06
NaN	NaN	NaN	NaN	NaN	NaN	22.95	NaN	0.02	NaN	NaN	NaN	NaN	NaN	NaN	NaN	NaN	NaN	32.86	NaN	0
NaN	NaN	NaN	NaN	NaN	NaN	23.01	NaN	-0.21	NaN	NaN	NaN	NaN	NaN	NaN	NaN	NaN	NaN	33.16	NaN	-0.2
NaN	NaN	NaN	NaN	NaN	NaN	23.08	NaN	-0.24	NaN	NaN	NaN	NaN	NaN	NaN	NaN	NaN	NaN	33.26	NaN	-0.44
NaN	NaN	NaN	NaN	NaN	NaN	23.14	NaN	-0.27	NaN	NaN	NaN	NaN	NaN	NaN	NaN	NaN	NaN	33.36	NaN	-0.36
NaN	NaN	NaN	NaN	NaN	NaN	23.22	NaN	-0.45	NaN	NaN	NaN	NaN	NaN	NaN	NaN	NaN	NaN	33.46	NaN	-0.33
NaN	NaN	NaN	NaN	NaN	NaN	23.3	NaN	-0.39	NaN	NaN	NaN	NaN	NaN	NaN	NaN	NaN	NaN	33.56	NaN	-0.22
NaN	NaN	NaN	NaN	NaN	NaN	23.39	NaN	-0.58	NaN	NaN	NaN	NaN	NaN	NaN	NaN	NaN	NaN	33.66	NaN	-0.41
NaN	NaN	NaN	NaN	NaN	NaN	23.48	NaN	-0.54	NaN	NaN	NaN	NaN	NaN	NaN	NaN	NaN	NaN	33.76	NaN	-0.38
NaN	NaN	NaN	NaN	NaN	NaN	23.56	NaN	-0.62	NaN	NaN	NaN	NaN	NaN	NaN	NaN	NaN	NaN	33.86	NaN	0.15
NaN	NaN	NaN	NaN	NaN	NaN	23.65	NaN	-0.59	NaN	NaN	NaN	NaN	NaN	NaN	NaN	NaN	NaN	33.96	NaN	-0.35
NaN	NaN	NaN	NaN	NaN	NaN	23.76	NaN	-0.6	NaN	NaN	NaN	NaN	NaN	NaN	NaN	NaN	NaN	34.06	NaN	-0.21
NaN	NaN	NaN	NaN	NaN	NaN	23.83	NaN	-0.64	NaN	NaN	NaN	NaN	NaN	NaN	NaN	NaN	NaN	34.16	NaN	-0.2
NaN	NaN	NaN	NaN	NaN	NaN	23.97	NaN	-0.59	NaN	NaN	NaN	NaN	NaN	NaN	NaN	NaN	NaN	34.26	NaN	-0.13
NaN	NaN	NaN	NaN	NaN	NaN	24.08	NaN	-0.62	NaN	NaN	NaN	NaN	NaN	NaN	NaN	NaN	NaN	34.46	NaN	-0.19
NaN	NaN	NaN	NaN	NaN	NaN	24.21	NaN	-0.6	NaN	NaN	NaN	NaN	NaN	NaN	NaN	NaN	NaN	34.56	NaN	-0.46
NaN	NaN	NaN	NaN	NaN	NaN	24.3	NaN	-0.6	NaN	NaN	NaN	NaN	NaN	NaN	NaN	NaN	NaN	34.66	NaN	-0.27
NaN	NaN	NaN	NaN	NaN	NaN	24.4	NaN	-0.68	NaN	NaN	NaN	NaN	NaN	NaN	NaN	NaN	NaN	34.76	NaN	-0.03
NaN	NaN	NaN	NaN	NaN	NaN	24.48	NaN	-0.56	NaN	NaN	NaN	NaN	NaN	NaN	NaN	NaN	NaN	34.86	NaN	0.08
NaN	NaN	NaN	NaN	NaN	NaN	24.6	NaN	-0.74	NaN	NaN	NaN	NaN	NaN	NaN	NaN	NaN	NaN	34.96	NaN	0.01
NaN	NaN	NaN	NaN	NaN	NaN	24.71	NaN	-0.65	NaN	NaN	NaN	NaN	NaN	NaN	NaN	NaN	NaN	35.06	NaN	-0.58
NaN	NaN	NaN	NaN	NaN	NaN	24.76	NaN	-0.61	NaN	NaN	NaN	NaN	NaN	NaN	NaN	NaN	NaN	35.16	NaN	-0.49
NaN	NaN	NaN	NaN	NaN	NaN	24.83	NaN	-0.64	NaN	NaN	NaN	NaN	NaN	NaN	NaN	NaN	NaN	35.26	NaN	-0.27
NaN	NaN	NaN	NaN	NaN	NaN	24.88	NaN	-0.72	NaN	NaN	NaN	NaN	NaN	NaN	NaN	NaN	NaN	35.46	NaN	-0.43
NaN	NaN	NaN	NaN	NaN	NaN	24.94	NaN	-0.65	NaN	NaN	NaN	NaN	NaN	NaN	NaN	NaN	NaN	35.66	NaN	-0.43
NaN	NaN	NaN	NaN	NaN	NaN	25.01	NaN	-0.56	NaN	NaN	NaN	NaN	NaN	NaN	NaN	NaN	NaN	35.76	NaN	-0.37
NaN	NaN	NaN	NaN	NaN	NaN	25.07	NaN	-0.65	NaN	NaN	NaN	NaN	NaN	NaN	NaN	NaN	NaN	35.86	NaN	-0.47
NaN	NaN	NaN	NaN	NaN	NaN	25.09	NaN	-0.51	NaN	NaN	NaN	NaN	NaN	NaN	NaN	NaN	NaN	35.96	NaN	-0.46
NaN	NaN	NaN	NaN	NaN	NaN	25.2	NaN	-0.58	NaN	NaN	NaN	NaN	NaN	NaN	NaN	NaN	NaN	36.06	NaN	-0.47
NaN	NaN	NaN	NaN	NaN	NaN	25.3	NaN	-0.58	NaN	NaN	NaN	NaN	NaN	NaN	NaN	NaN	NaN	36.16	NaN	-0.45
NaN	NaN	NaN	NaN	NaN	NaN	25.36	NaN	-0.57	NaN	NaN	NaN	NaN	NaN	NaN	NaN	NaN	NaN	36.26	NaN	-0.5
NaN	NaN	NaN	NaN	NaN	NaN	25.4	NaN	-0.7	NaN	NaN	NaN	NaN	NaN	NaN	NaN	NaN	NaN	36.36	NaN	-0.67
NaN	NaN	NaN	NaN	NaN	NaN	25.43	NaN	-0.63	NaN	NaN	NaN	NaN	NaN	NaN	NaN	NaN	NaN	36.46	NaN	-0.61
NaN	NaN	NaN	NaN	NaN	NaN	25.46	NaN	-0.78	NaN	NaN	NaN	NaN	NaN	NaN	NaN	NaN	NaN	36.56	NaN	-0.28
NaN	NaN	NaN	NaN	NaN	NaN	25.49	NaN	-0.6	NaN	NaN	NaN	NaN	NaN	NaN	NaN	NaN	NaN	36.66	NaN	-0.69
NaN	NaN	NaN	NaN	NaN	NaN	25.53	NaN	-0.46	NaN	NaN	NaN	NaN	NaN	NaN	NaN	NaN	NaN	36.76	NaN	-0.82
NaN	NaN	NaN	NaN	NaN	NaN	25.58	NaN	-0.28	NaN	NaN	NaN	NaN	NaN	NaN	NaN	NaN	NaN	36.86	NaN	-0.67
NaN	NaN	NaN	NaN	NaN	NaN	26	NaN	-0.51	NaN	NaN	NaN	NaN	NaN	NaN	NaN	NaN	NaN	36.96	NaN	-0.25
NaN	NaN	NaN	NaN	NaN	NaN	26.24	NaN	-0.62	NaN	NaN	NaN	NaN	NaN	NaN	NaN	NaN	NaN	37.06	NaN	-0.45
NaN	NaN	NaN	NaN	NaN	NaN	26.33	NaN	-0.53	NaN	NaN	NaN	NaN	NaN	NaN	NaN	NaN	NaN	37.16	NaN	-0.7
NaN	NaN	NaN	NaN	NaN	NaN	26.39	NaN	-0.48	NaN	NaN	NaN	NaN	NaN	NaN	NaN	NaN	NaN	37.56	NaN	-0.65
NaN	NaN	NaN	NaN	NaN	NaN	26.44	NaN	-0.39	NaN	NaN	NaN	NaN	NaN	NaN	NaN	NaN	NaN	37.66	NaN	-0.43
NaN	NaN	NaN	NaN	NaN	NaN	26.49	NaN	-0.41	NaN	NaN	NaN	NaN	NaN	NaN	NaN	NaN	NaN	37.76	NaN	-0.6
NaN	NaN	NaN	NaN	NaN	NaN	26.57	NaN	-0.13	NaN	NaN	NaN	NaN	NaN	NaN	NaN	NaN	NaN	37.86	NaN	-0.48
NaN	NaN	NaN	NaN	NaN	NaN	26.71	NaN	-0.24	NaN	NaN	NaN	NaN	NaN	NaN	NaN	NaN	NaN	37.96	NaN	-0.14
NaN	NaN	NaN	NaN	NaN	NaN	27.07	NaN	-0.42	NaN	NaN	NaN	NaN	NaN	NaN	NaN	NaN	NaN	38.06	NaN	-0.21
NaN	NaN	NaN	NaN	NaN	NaN	27.28	NaN	-0.58	NaN	NaN	NaN	NaN	NaN	NaN	NaN	NaN	NaN	38.16	NaN	-0.21
NaN	NaN	NaN	NaN	NaN	NaN	27.37	NaN	-0.6	NaN	NaN	NaN	NaN	NaN	NaN	NaN	NaN	NaN	38.26	NaN	0.21
NaN	NaN	NaN	NaN	NaN	NaN	27.44	NaN	-0.37	NaN	NaN	NaN	NaN	NaN	NaN	NaN	NaN	NaN	38.46	NaN	-0.26
NaN	NaN	NaN	NaN	NaN	NaN	27.49	NaN	-0.64	NaN	NaN	NaN	NaN	NaN	NaN	NaN	NaN	NaN	38.56	NaN	0.02
NaN	NaN	NaN	NaN	NaN	NaN	27.56	NaN	-0.7	NaN	NaN	NaN	NaN	NaN	NaN	NaN	NaN	NaN	38.74	NaN	-0.07
NaN	NaN	NaN	NaN	NaN	NaN	27.73	NaN	-0.54	NaN	NaN	NaN	NaN	NaN	NaN	NaN	NaN	NaN	38.84	NaN	-0.14
NaN	NaN	NaN	NaN	NaN	NaN	27.85	NaN	-0.55	NaN	NaN	NaN	NaN	NaN	NaN	NaN	NaN	NaN	38.94	NaN	-0.17
NaN	NaN	NaN	NaN	NaN	NaN	27.98	NaN	-0.4	NaN	NaN	NaN	NaN	NaN	NaN	NaN	NaN	NaN	39.04	NaN	-0.2
NaN	NaN	NaN	NaN	NaN	NaN	28.09	NaN	-0.42	NaN	NaN	NaN	NaN	NaN	NaN	NaN	NaN	NaN	39.14	NaN	-0.21
NaN	NaN	NaN	NaN	NaN	NaN	28.19	NaN	-0.55	NaN	NaN	NaN	NaN	NaN	NaN	NaN	NaN	NaN	39.24	NaN	-0.36
NaN	NaN	NaN	NaN	NaN	NaN	28.29	NaN	-0.29	NaN	NaN	NaN	NaN	NaN	NaN	NaN	NaN	NaN	39.34	NaN	-1.18
NaN	NaN	NaN	NaN	NaN	NaN	28.39	NaN	-0.35	NaN	NaN	NaN	NaN	NaN	NaN	NaN	NaN	NaN	39.44	NaN	-0.39
NaN	NaN	NaN	NaN	NaN	NaN	28.48	NaN	-0.47	NaN	NaN	NaN	NaN	NaN	NaN	NaN	NaN	NaN	39.64	NaN	-0.73
NaN	NaN	NaN	NaN	NaN	NaN	28.58	NaN	-0.2	NaN	NaN	NaN	NaN	NaN	NaN	NaN	NaN	NaN	39.74	NaN	-0.46
NaN	NaN	NaN	NaN	NaN	NaN	28.68	NaN	-0.24	NaN	NaN	NaN	NaN	NaN	NaN	NaN	NaN	NaN	39.84	NaN	-0.52
NaN	NaN	NaN	NaN	NaN	NaN	28.78	NaN	-0.44	NaN	NaN	NaN	NaN	NaN	NaN	NaN	NaN	NaN	39.94	NaN	-0.45
NaN	NaN	NaN	NaN	NaN	NaN	28.89	NaN	-0.38	NaN	NaN	NaN	NaN	NaN	NaN	NaN	NaN	NaN	40.04	NaN	0.09
NaN	NaN	NaN	NaN	NaN	NaN	28.99	NaN	-0.42	NaN	NaN	NaN	NaN	NaN	NaN	NaN	NaN	NaN	40.14	NaN	-0.22
NaN	NaN	NaN	NaN	NaN	NaN	29.08	NaN	-0.47	NaN	NaN	NaN	NaN	NaN	NaN	NaN	NaN	NaN	40.24	NaN	-0.18
NaN	NaN	NaN	NaN	NaN	NaN	29.27	NaN	-0.36	NaN	NaN	NaN	NaN	NaN	NaN	NaN	NaN	NaN	40.34	NaN	-0.25
NaN	NaN	NaN	NaN	NaN	NaN	29.37	NaN	-0.64	NaN	NaN	NaN	NaN	NaN	NaN	NaN	NaN	NaN	40.44	NaN	-0.58
NaN	NaN	NaN	NaN	NaN	NaN	29.48	NaN	-0.62	NaN	NaN	NaN	NaN	NaN	NaN	NaN	NaN	NaN	40.54	NaN	-0.58
NaN	NaN	NaN	NaN	NaN	NaN	29.59	NaN	-0.67	NaN	NaN	NaN	NaN	NaN	NaN	NaN	NaN	NaN	40.64	NaN	-0.35
NaN	NaN	NaN	NaN	NaN	NaN	29.69	NaN	-0.53	NaN	NaN	NaN	NaN	NaN	NaN	NaN	NaN	NaN	40.74	NaN	-0.5
NaN	NaN	NaN	NaN	NaN	NaN	29.78	NaN	-0.49	NaN	NaN	NaN	NaN	NaN	NaN	NaN	NaN	NaN	40.84	NaN	-0.53
NaN	NaN	NaN	NaN	NaN	NaN	29.87	NaN	-0.62	NaN	NaN	NaN	NaN	NaN	NaN	NaN	NaN	NaN	40.94	NaN	-0.44
NaN	NaN	NaN	NaN	NaN	NaN	29.97	NaN	-0.49	NaN	NaN	NaN	NaN	NaN	NaN	NaN	NaN	NaN	41.04	NaN	-0.63
NaN	NaN	NaN	NaN	NaN	NaN	30.08	NaN	-0.39	NaN	NaN	NaN	NaN	NaN	NaN	NaN	NaN	NaN	41.14	NaN	-0.17
NaN	NaN	NaN	NaN	NaN	NaN	30.18	NaN	-0.3	NaN	NaN	NaN	NaN	NaN	NaN	NaN	NaN	NaN	41.24	NaN	-0.61
NaN	NaN	NaN	NaN	NaN	NaN	30.28	NaN	-0.22	NaN	NaN	NaN	NaN	NaN	NaN	NaN	NaN	NaN	41.34	NaN	-0.47
NaN	NaN	NaN	NaN	NaN	NaN	30.38	NaN	-0.31	NaN	NaN	NaN	NaN	NaN	NaN	NaN	NaN	NaN	41.74	NaN	-0.37
NaN	NaN	NaN	NaN	NaN	NaN	30.47	NaN	-0.4	NaN	NaN	NaN	NaN	NaN	NaN	NaN	NaN	NaN	41.84	NaN	-0.34
NaN	NaN	NaN	NaN	NaN	NaN	30.78	NaN	-0.4	NaN	NaN	NaN	NaN	NaN	NaN	NaN	NaN	NaN	41.94	NaN	-0.25
NaN	NaN	NaN	NaN	NaN	NaN	30.88	NaN	-0.67	NaN	NaN	NaN	NaN	NaN	NaN	NaN	NaN	NaN	42.04	NaN	-0.34
NaN	NaN	NaN	NaN	NaN	NaN	30.98	NaN	-0.5	NaN	NaN	NaN	NaN	NaN	NaN	NaN	NaN	NaN	42.14	NaN	-0.33
NaN	NaN	NaN	NaN	NaN	NaN	31.08	NaN	-0.43	NaN	NaN	NaN	NaN	NaN	NaN	NaN	NaN	NaN	42.24	NaN	-0.27
NaN	NaN	NaN	NaN	NaN	NaN	31.18	NaN	-0.28	NaN	NaN	NaN	NaN	NaN	NaN	NaN	NaN	NaN	42.34	NaN	-0.15
NaN	NaN	NaN	NaN	NaN	NaN	31.28	NaN	-0.42	NaN	NaN	NaN	NaN	NaN	NaN	NaN	NaN	NaN	42.44	NaN	-0.23
NaN	NaN	NaN	NaN	NaN	NaN	31.38	NaN	-0.39	NaN	NaN	NaN	NaN	NaN	NaN	NaN	NaN	NaN	42.54	NaN	-0.21
NaN	NaN	NaN	NaN	NaN	NaN	31.49	NaN	-0.3	NaN	NaN	NaN	NaN	NaN	NaN	NaN	NaN	NaN	42.64	NaN	-0.45
NaN	NaN	NaN	NaN	NaN	NaN	31.59	NaN	-0.45	NaN	NaN	NaN	NaN	NaN	NaN	NaN	NaN	NaN	42.74	NaN	-0.57
NaN	NaN	NaN	NaN	NaN	NaN	31.68	NaN	-0.4	NaN	NaN	NaN	NaN	NaN	NaN	NaN	NaN	NaN	42.84	NaN	-0.52
NaN	NaN	NaN	NaN	NaN	NaN	31.78	NaN	-0.47	NaN	NaN	NaN	NaN	NaN	NaN	NaN	NaN	NaN	42.94	NaN	-0.42
NaN	NaN	NaN	NaN	NaN	NaN	31.89	NaN	-0.43	NaN	NaN	NaN	NaN	NaN	NaN	NaN	NaN	NaN	43.04	NaN	-0.63
NaN	NaN	NaN	NaN	NaN	NaN	32.02	NaN	-0.74	NaN	NaN	NaN	NaN	NaN	NaN	NaN	NaN	NaN	43.14	NaN	-0.62
NaN	NaN	NaN	NaN	NaN	NaN	32.16	NaN	-0.83	NaN	NaN	NaN	NaN	NaN	NaN	NaN	NaN	NaN	43.24	NaN	-0.6
NaN	NaN	NaN	NaN	NaN	NaN	32.32	NaN	-0.82	NaN	NaN	NaN	NaN	NaN	NaN	NaN	NaN	NaN	43.34	NaN	-0.62
NaN	NaN	NaN	NaN	NaN	NaN	32.46	NaN	-0.82	NaN	NaN	NaN	NaN	NaN	NaN	NaN	NaN	NaN	43.44	NaN	-0.56
NaN	NaN	NaN	NaN	NaN	NaN	32.57	NaN	-0.85	NaN	NaN	NaN	NaN	NaN	NaN	NaN	NaN	NaN	43.54	NaN	-0.48
NaN	NaN	NaN	NaN	NaN	NaN	32.66	NaN	-0.8	NaN	NaN	NaN	NaN	NaN	NaN	NaN	NaN	NaN	43.64	NaN	0.01
NaN	NaN	NaN	NaN	NaN	NaN	32.74	NaN	-0.81	NaN	NaN	NaN	NaN	NaN	NaN	NaN	NaN	NaN	43.74	NaN	-0.44
NaN	NaN	NaN	NaN	NaN	NaN	32.82	NaN	-0.85	NaN	NaN	NaN	NaN	NaN	NaN	NaN	NaN	NaN	43.84	NaN	-0.49
NaN	NaN	NaN	NaN	NaN	NaN	32.91	NaN	-0.89	NaN	NaN	NaN	NaN	NaN	NaN	NaN	NaN	NaN	43.94	NaN	-0.42
NaN	NaN	NaN	NaN	NaN	NaN	33.02	NaN	-0.79	NaN	NaN	NaN	NaN	NaN	NaN	NaN	NaN	NaN	44.04	NaN	-0.5
NaN	NaN	NaN	NaN	NaN	NaN	33.15	NaN	-0.79	NaN	NaN	NaN	NaN	NaN	NaN	NaN	NaN	NaN	44.14	NaN	-0.64
NaN	NaN	NaN	NaN	NaN	NaN	33.26	NaN	-0.69	NaN	NaN	NaN	NaN	NaN	NaN	NaN	NaN	NaN	44.24	NaN	-0.35
NaN	NaN	NaN	NaN	NaN	NaN	33.33	NaN	-0.51	NaN	NaN	NaN	NaN	NaN	NaN	NaN	NaN	NaN	44.34	NaN	-0.47
NaN	NaN	NaN	NaN	NaN	NaN	33.39	NaN	-0.57	NaN	NaN	NaN	NaN	NaN	NaN	NaN	NaN	NaN	44.44	NaN	-0.44
NaN	NaN	NaN	NaN	NaN	NaN	33.43	NaN	-0.65	NaN	NaN	NaN	NaN	NaN	NaN	NaN	NaN	NaN	44.54	NaN	-0.55
NaN	NaN	NaN	NaN	NaN	NaN	33.48	NaN	-0.66	NaN	NaN	NaN	NaN	NaN	NaN	NaN	NaN	NaN	44.64	NaN	-0.51
NaN	NaN	NaN	NaN	NaN	NaN	33.53	NaN	-0.54	NaN	NaN	NaN	NaN	NaN	NaN	NaN	NaN	NaN	44.74	NaN	-0.3
NaN	NaN	NaN	NaN	NaN	NaN	33.6	NaN	-0.79	NaN	NaN	NaN	NaN	NaN	NaN	NaN	NaN	NaN	44.84	NaN	-0.37
NaN	NaN	NaN	NaN	NaN	NaN	33.7	NaN	-0.76	NaN	NaN	NaN	NaN	NaN	NaN	NaN	NaN	NaN	44.94	NaN	-0.34
NaN	NaN	NaN	NaN	NaN	NaN	33.91	NaN	-0.98	NaN	NaN	NaN	NaN	NaN	NaN	NaN	NaN	NaN	45.04	NaN	-0.32
NaN	NaN	NaN	NaN	NaN	NaN	34.14	NaN	-1.06	NaN	NaN	NaN	NaN	NaN	NaN	NaN	NaN	NaN	45.34	NaN	-0.37
NaN	NaN	NaN	NaN	NaN	NaN	34.27	NaN	-0.96	NaN	NaN	NaN	NaN	NaN	NaN	NaN	NaN	NaN	45.44	NaN	-0.41
NaN	NaN	NaN	NaN	NaN	NaN	34.35	NaN	-0.91	NaN	NaN	NaN	NaN	NaN	NaN	NaN	NaN	NaN	45.54	NaN	-0.7
NaN	NaN	NaN	NaN	NaN	NaN	34.4	NaN	-0.94	NaN	NaN	NaN	NaN	NaN	NaN	NaN	NaN	NaN	45.64	NaN	-0.59
NaN	NaN	NaN	NaN	NaN	NaN	34.43	NaN	-0.8	NaN	NaN	NaN	NaN	NaN	NaN	NaN	NaN	NaN	46.04	NaN	-0.7
NaN	NaN	NaN	NaN	NaN	NaN	34.54	NaN	-0.75	NaN	NaN	NaN	NaN	NaN	NaN	NaN	NaN	NaN	46.14	NaN	-0.54
NaN	NaN	NaN	NaN	NaN	NaN	34.67	NaN	-0.57	NaN	NaN	NaN	NaN	NaN	NaN	NaN	NaN	NaN	46.24	NaN	-0.66
NaN	NaN	NaN	NaN	NaN	NaN	34.77	NaN	-0.51	NaN	NaN	NaN	NaN	NaN	NaN	NaN	NaN	NaN	46.34	NaN	-0.7
NaN	NaN	NaN	NaN	NaN	NaN	34.88	NaN	-0.42	NaN	NaN	NaN	NaN	NaN	NaN	NaN	NaN	NaN	46.44	NaN	-0.82
NaN	NaN	NaN	NaN	NaN	NaN	34.98	NaN	-0.25	NaN	NaN	NaN	NaN	NaN	NaN	NaN	NaN	NaN	46.54	NaN	-0.73
NaN	NaN	NaN	NaN	NaN	NaN	35.09	NaN	-0.26	NaN	NaN	NaN	NaN	NaN	NaN	NaN	NaN	NaN	46.64	NaN	-0.72
NaN	NaN	NaN	NaN	NaN	NaN	35.19	NaN	-0.2	NaN	NaN	NaN	NaN	NaN	NaN	NaN	NaN	NaN	46.74	NaN	-0.21
NaN	NaN	NaN	NaN	NaN	NaN	35.29	NaN	-0.29	NaN	NaN	NaN	NaN	NaN	NaN	NaN	NaN	NaN	46.86	NaN	-0.34
NaN	NaN	NaN	NaN	NaN	NaN	35.39	NaN	-0.4	NaN	NaN	NaN	NaN	NaN	NaN	NaN	NaN	NaN	46.96	NaN	-0.69
NaN	NaN	NaN	NaN	NaN	NaN	35.48	NaN	-0.53	NaN	NaN	NaN	NaN	NaN	NaN	NaN	NaN	NaN	47.06	NaN	-0.69
NaN	NaN	NaN	NaN	NaN	NaN	35.58	NaN	-0.43	NaN	NaN	NaN	NaN	NaN	NaN	NaN	NaN	NaN	47.16	NaN	-0.49
NaN	NaN	NaN	NaN	NaN	NaN	35.78	NaN	-0.29	NaN	NaN	NaN	NaN	NaN	NaN	NaN	NaN	NaN	47.46	NaN	-0.49
NaN	NaN	NaN	NaN	NaN	NaN	35.88	NaN	-0.26	NaN	NaN	NaN	NaN	NaN	NaN	NaN	NaN	NaN	47.56	NaN	-0.63
NaN	NaN	NaN	NaN	NaN	NaN	35.98	NaN	-0.23	NaN	NaN	NaN	NaN	NaN	NaN	NaN	NaN	NaN	47.66	NaN	-0.64
NaN	NaN	NaN	NaN	NaN	NaN	36.08	NaN	-0.29	NaN	NaN	NaN	NaN	NaN	NaN	NaN	NaN	NaN	47.76	NaN	-0.76
NaN	NaN	NaN	NaN	NaN	NaN	36.18	NaN	-0.16	NaN	NaN	NaN	NaN	NaN	NaN	NaN	NaN	NaN	47.86	NaN	-0.68
NaN	NaN	NaN	NaN	NaN	NaN	36.28	NaN	-0.32	NaN	NaN	NaN	NaN	NaN	NaN	NaN	NaN	NaN	47.96	NaN	-0.8
NaN	NaN	NaN	NaN	NaN	NaN	36.38	NaN	-0.42	NaN	NaN	NaN	NaN	NaN	NaN	NaN	NaN	NaN	48.06	NaN	-0.85
NaN	NaN	NaN	NaN	NaN	NaN	36.48	NaN	-0.29	NaN	NaN	NaN	NaN	NaN	NaN	NaN	NaN	NaN	48.16	NaN	-0.77
NaN	NaN	NaN	NaN	NaN	NaN	36.57	NaN	-0.37	NaN	NaN	NaN	NaN	NaN	NaN	NaN	NaN	NaN	48.26	NaN	-0.85
NaN	NaN	NaN	NaN	NaN	NaN	36.67	NaN	-0.38	NaN	NaN	NaN	NaN	NaN	NaN	NaN	NaN	NaN	48.46	NaN	-0.62
NaN	NaN	NaN	NaN	NaN	NaN	36.76	NaN	-0.4	NaN	NaN	NaN	NaN	NaN	NaN	NaN	NaN	NaN	48.66	NaN	-0.71
NaN	NaN	NaN	NaN	NaN	NaN	36.78	NaN	-0.3	NaN	NaN	NaN	NaN	NaN	NaN	NaN	NaN	NaN	48.76	NaN	-0.55
NaN	NaN	NaN	NaN	NaN	NaN	36.87	NaN	-0.63	NaN	NaN	NaN	NaN	NaN	NaN	NaN	NaN	NaN	48.86	NaN	-0.57
NaN	NaN	NaN	NaN	NaN	NaN	36.96	NaN	-0.14	NaN	NaN	NaN	NaN	NaN	NaN	NaN	NaN	NaN	48.96	NaN	-0.43
NaN	NaN	NaN	NaN	NaN	NaN	36.98	NaN	-0.32	NaN	NaN	NaN	NaN	NaN	NaN	NaN	NaN	NaN	49.16	NaN	-0.83
NaN	NaN	NaN	NaN	NaN	NaN	37.06	NaN	-0.2	NaN	NaN	NaN	NaN	NaN	NaN	NaN	NaN	NaN	49.26	NaN	-0.49
NaN	NaN	NaN	NaN	NaN	NaN	37.08	NaN	-0.17	NaN	NaN	NaN	NaN	NaN	NaN	NaN	NaN	NaN	49.36	NaN	-0.2
NaN	NaN	NaN	NaN	NaN	NaN	37.16	NaN	-0.2	NaN	NaN	NaN	NaN	NaN	NaN	NaN	NaN	NaN	49.46	NaN	-0.33
NaN	NaN	NaN	NaN	NaN	NaN	37.18	NaN	-0.35	NaN	NaN	NaN	NaN	NaN	NaN	NaN	NaN	NaN	49.56	NaN	-0.14
NaN	NaN	NaN	NaN	NaN	NaN	37.26	NaN	-0.39	NaN	NaN	NaN	NaN	NaN	NaN	NaN	NaN	NaN	49.66	NaN	-0.31
NaN	NaN	NaN	NaN	NaN	NaN	37.36	NaN	-0.37	NaN	NaN	NaN	NaN	NaN	NaN	NaN	NaN	NaN	49.76	NaN	-0.38
NaN	NaN	NaN	NaN	NaN	NaN	37.46	NaN	-0.39	NaN	NaN	NaN	NaN	NaN	NaN	NaN	NaN	NaN	49.86	NaN	-0.58
NaN	NaN	NaN	NaN	NaN	NaN	37.55	NaN	-0.46	NaN	NaN	NaN	NaN	NaN	NaN	NaN	NaN	NaN	49.96	NaN	-0.71
NaN	NaN	NaN	NaN	NaN	NaN	37.65	NaN	-0.52	NaN	NaN	NaN	NaN	NaN	NaN	NaN	NaN	NaN	50.16	NaN	-0.37
NaN	NaN	NaN	NaN	NaN	NaN	37.75	NaN	-0.52	NaN	NaN	NaN	NaN	NaN	NaN	NaN	NaN	NaN	50.26	NaN	-0.25
NaN	NaN	NaN	NaN	NaN	NaN	37.85	NaN	-0.58	NaN	NaN	NaN	NaN	NaN	NaN	NaN	NaN	NaN	50.36	NaN	-0.29
NaN	NaN	NaN	NaN	NaN	NaN	37.94	NaN	-0.61	NaN	NaN	NaN	NaN	NaN	NaN	NaN	NaN	NaN	50.46	NaN	-0.32
NaN	NaN	NaN	NaN	NaN	NaN	38.04	NaN	-0.59	NaN	NaN	NaN	NaN	NaN	NaN	NaN	NaN	NaN	50.56	NaN	-0.15
NaN	NaN	NaN	NaN	NaN	NaN	38.14	NaN	-0.64	NaN	NaN	NaN	NaN	NaN	NaN	NaN	NaN	NaN	50.66	NaN	-0.43
NaN	NaN	NaN	NaN	NaN	NaN	38.24	NaN	-0.63	NaN	NaN	NaN	NaN	NaN	NaN	NaN	NaN	NaN	50.76	NaN	0.04
NaN	NaN	NaN	NaN	NaN	NaN	38.34	NaN	-0.58	NaN	NaN	NaN	NaN	NaN	NaN	NaN	NaN	NaN	50.86	NaN	0.08
NaN	NaN	NaN	NaN	NaN	NaN	38.44	NaN	-0.37	NaN	NaN	NaN	NaN	NaN	NaN	NaN	NaN	NaN	50.96	NaN	-0.43
NaN	NaN	NaN	NaN	NaN	NaN	38.54	NaN	-0.27	NaN	NaN	NaN	NaN	NaN	NaN	NaN	NaN	NaN	51.06	NaN	-0.07
NaN	NaN	NaN	NaN	NaN	NaN	38.64	NaN	-0.03	NaN	NaN	NaN	NaN	NaN	NaN	NaN	NaN	NaN	51.16	NaN	-0.12
NaN	NaN	NaN	NaN	NaN	NaN	38.73	NaN	-0.19	NaN	NaN	NaN	NaN	NaN	NaN	NaN	NaN	NaN	51.26	NaN	-0.13
NaN	NaN	NaN	NaN	NaN	NaN	38.83	NaN	-0.29	NaN	NaN	NaN	NaN	NaN	NaN	NaN	NaN	NaN	51.36	NaN	-0.29
NaN	NaN	NaN	NaN	NaN	NaN	38.93	NaN	-0.41	NaN	NaN	NaN	NaN	NaN	NaN	NaN	NaN	NaN	51.46	NaN	-0.36
NaN	NaN	NaN	NaN	NaN	NaN	39.03	NaN	-0.7	NaN	NaN	NaN	NaN	NaN	NaN	NaN	NaN	NaN	51.66	NaN	-0.24
NaN	NaN	NaN	NaN	NaN	NaN	39.14	NaN	-0.16	NaN	NaN	NaN	NaN	NaN	NaN	NaN	NaN	NaN	51.76	NaN	-0.04
NaN	NaN	NaN	NaN	NaN	NaN	39.23	NaN	-0.24	NaN	NaN	NaN	NaN	NaN	NaN	NaN	NaN	NaN	51.96	NaN	-0.11
NaN	NaN	NaN	NaN	NaN	NaN	39.33	NaN	-0.17	NaN	NaN	NaN	NaN	NaN	NaN	NaN	NaN	NaN	52.06	NaN	0.13
NaN	NaN	NaN	NaN	NaN	NaN	39.44	NaN	-0.12	NaN	NaN	NaN	NaN	NaN	NaN	NaN	NaN	NaN	52.16	NaN	-0.07
NaN	NaN	NaN	NaN	NaN	NaN	39.54	NaN	-0.22	NaN	NaN	NaN	NaN	NaN	NaN	NaN	NaN	NaN	52.26	NaN	-0.11
NaN	NaN	NaN	NaN	NaN	NaN	39.64	NaN	0.07	NaN	NaN	NaN	NaN	NaN	NaN	NaN	NaN	NaN	52.36	NaN	-0.15
NaN	NaN	NaN	NaN	NaN	NaN	39.74	NaN	-0.13	NaN	NaN	NaN	NaN	NaN	NaN	NaN	NaN	NaN	52.46	NaN	-0.33
NaN	NaN	NaN	NaN	NaN	NaN	39.85	NaN	-0.4	NaN	NaN	NaN	NaN	NaN	NaN	NaN	NaN	NaN	52.56	NaN	-0.12
NaN	NaN	NaN	NaN	NaN	NaN	39.96	NaN	-0.39	NaN	NaN	NaN	NaN	NaN	NaN	NaN	NaN	NaN	52.66	NaN	-0.22
NaN	NaN	NaN	NaN	NaN	NaN	40.07	NaN	-0.43	NaN	NaN	NaN	NaN	NaN	NaN	NaN	NaN	NaN	52.76	NaN	-0.46
NaN	NaN	NaN	NaN	NaN	NaN	40.19	NaN	-0.49	NaN	NaN	NaN	NaN	NaN	NaN	NaN	NaN	NaN	52.86	NaN	-0.33
NaN	NaN	NaN	NaN	NaN	NaN	40.31	NaN	-0.5	NaN	NaN	NaN	NaN	NaN	NaN	NaN	NaN	NaN	52.96	NaN	-0.46
NaN	NaN	NaN	NaN	NaN	NaN	40.41	NaN	-0.54	NaN	NaN	NaN	NaN	NaN	NaN	NaN	NaN	NaN	53.06	NaN	-0.6
NaN	NaN	NaN	NaN	NaN	NaN	40.5	NaN	-0.36	NaN	NaN	NaN	NaN	NaN	NaN	NaN	NaN	NaN	53.16	NaN	-0.59
NaN	NaN	NaN	NaN	NaN	NaN	40.58	NaN	-0.16	NaN	NaN	NaN	NaN	NaN	NaN	NaN	NaN	NaN	53.26	NaN	-0.51
NaN	NaN	NaN	NaN	NaN	NaN	40.72	NaN	-0.14	NaN	NaN	NaN	NaN	NaN	NaN	NaN	NaN	NaN	53.36	NaN	-0.2
NaN	NaN	NaN	NaN	NaN	NaN	40.79	NaN	-0.29	NaN	NaN	NaN	NaN	NaN	NaN	NaN	NaN	NaN	53.46	NaN	-0.3
NaN	NaN	NaN	NaN	NaN	NaN	40.86	NaN	-0.33	NaN	NaN	NaN	NaN	NaN	NaN	NaN	NaN	NaN	53.56	NaN	-0.69
NaN	NaN	NaN	NaN	NaN	NaN	40.93	NaN	-0.26	NaN	NaN	NaN	NaN	NaN	NaN	NaN	NaN	NaN	53.66	NaN	-0.03
NaN	NaN	NaN	NaN	NaN	NaN	41.02	NaN	-0.49	NaN	NaN	NaN	NaN	NaN	NaN	NaN	NaN	NaN	53.76	NaN	-0.26
NaN	NaN	NaN	NaN	NaN	NaN	41.12	NaN	-0.56	NaN	NaN	NaN	NaN	NaN	NaN	NaN	NaN	NaN	53.86	NaN	0.14
NaN	NaN	NaN	NaN	NaN	NaN	41.22	NaN	-0.61	NaN	NaN	NaN	NaN	NaN	NaN	NaN	NaN	NaN	53.96	NaN	-0.34
NaN	NaN	NaN	NaN	NaN	NaN	41.35	NaN	-0.66	NaN	NaN	NaN	NaN	NaN	NaN	NaN	NaN	NaN	54.06	NaN	-0.05
NaN	NaN	NaN	NaN	NaN	NaN	41.47	NaN	-0.71	NaN	NaN	NaN	NaN	NaN	NaN	NaN	NaN	NaN	54.16	NaN	-0.12
NaN	NaN	NaN	NaN	NaN	NaN	41.6	NaN	-0.58	NaN	NaN	NaN	NaN	NaN	NaN	NaN	NaN	NaN	54.26	NaN	-0.13
NaN	NaN	NaN	NaN	NaN	NaN	41.72	NaN	-0.68	NaN	NaN	NaN	NaN	NaN	NaN	NaN	NaN	NaN	54.36	NaN	-0.28
NaN	NaN	NaN	NaN	NaN	NaN	41.82	NaN	-0.65	NaN	NaN	NaN	NaN	NaN	NaN	NaN	NaN	NaN	54.56	NaN	0.17
NaN	NaN	NaN	NaN	NaN	NaN	41.92	NaN	-0.61	NaN	NaN	NaN	NaN	NaN	NaN	NaN	NaN	NaN	54.76	NaN	-0.06
NaN	NaN	NaN	NaN	NaN	NaN	42.01	NaN	-0.79	NaN	NaN	NaN	NaN	NaN	NaN	NaN	NaN	NaN	54.86	NaN	-0.11
NaN	NaN	NaN	NaN	NaN	NaN	42.11	NaN	-0.52	NaN	NaN	NaN	NaN	NaN	NaN	NaN	NaN	NaN	54.96	NaN	-0.04
NaN	NaN	NaN	NaN	NaN	NaN	42.19	NaN	-0.38	NaN	NaN	NaN	NaN	NaN	NaN	NaN	NaN	NaN	55.06	NaN	-0.28
NaN	NaN	NaN	NaN	NaN	NaN	42.28	NaN	-0.39	NaN	NaN	NaN	NaN	NaN	NaN	NaN	NaN	NaN	55.16	NaN	-0.29
NaN	NaN	NaN	NaN	NaN	NaN	42.38	NaN	-0.38	NaN	NaN	NaN	NaN	NaN	NaN	NaN	NaN	NaN	55.36	NaN	-0.19
NaN	NaN	NaN	NaN	NaN	NaN	42.48	NaN	-0.29	NaN	NaN	NaN	NaN	NaN	NaN	NaN	NaN	NaN	55.46	NaN	-0.26
NaN	NaN	NaN	NaN	NaN	NaN	42.58	NaN	-0.25	NaN	NaN	NaN	NaN	NaN	NaN	NaN	NaN	NaN	55.66	NaN	-0.06
NaN	NaN	NaN	NaN	NaN	NaN	42.69	NaN	0	NaN	NaN	NaN	NaN	NaN	NaN	NaN	NaN	NaN	55.76	NaN	-0.35
NaN	NaN	NaN	NaN	NaN	NaN	42.79	NaN	-0.16	NaN	NaN	NaN	NaN	NaN	NaN	NaN	NaN	NaN	55.86	NaN	0.18
NaN	NaN	NaN	NaN	NaN	NaN	42.9	NaN	0.03	NaN	NaN	NaN	NaN	NaN	NaN	NaN	NaN	NaN	55.96	NaN	-0.12
NaN	NaN	NaN	NaN	NaN	NaN	43	NaN	-0.01	NaN	NaN	NaN	NaN	NaN	NaN	NaN	NaN	NaN	56.06	NaN	-0.46
NaN	NaN	NaN	NaN	NaN	NaN	43.09	NaN	0.02	NaN	NaN	NaN	NaN	NaN	NaN	NaN	NaN	NaN	56.16	NaN	-0.48
NaN	NaN	NaN	NaN	NaN	NaN	43.19	NaN	-0.02	NaN	NaN	NaN	NaN	NaN	NaN	NaN	NaN	NaN	56.36	NaN	-0.57
NaN	NaN	NaN	NaN	NaN	NaN	43.28	NaN	-0.06	NaN	NaN	NaN	NaN	NaN	NaN	NaN	NaN	NaN	56.56	NaN	-0.55
NaN	NaN	NaN	NaN	NaN	NaN	43.38	NaN	-0.07	NaN	NaN	NaN	NaN	NaN	NaN	NaN	NaN	NaN	56.66	NaN	-0.5
NaN	NaN	NaN	NaN	NaN	NaN	43.48	NaN	-0.13	NaN	NaN	NaN	NaN	NaN	NaN	NaN	NaN	NaN	56.76	NaN	-0.43
NaN	NaN	NaN	NaN	NaN	NaN	43.58	NaN	-0.15	NaN	NaN	NaN	NaN	NaN	NaN	NaN	NaN	NaN	56.86	NaN	-0.31
NaN	NaN	NaN	NaN	NaN	NaN	43.69	NaN	-0.29	NaN	NaN	NaN	NaN	NaN	NaN	NaN	NaN	NaN	56.96	NaN	-0.28
NaN	NaN	NaN	NaN	NaN	NaN	43.79	NaN	-0.23	NaN	NaN	NaN	NaN	NaN	NaN	NaN	NaN	NaN	57.16	NaN	-0.15
NaN	NaN	NaN	NaN	NaN	NaN	43.89	NaN	-0.42	NaN	NaN	NaN	NaN	NaN	NaN	NaN	NaN	NaN	57.26	NaN	-0.29
NaN	NaN	NaN	NaN	NaN	NaN	43.99	NaN	-0.39	NaN	NaN	NaN	NaN	NaN	NaN	NaN	NaN	NaN	57.36	NaN	-0.03
NaN	NaN	NaN	NaN	NaN	NaN	44.08	NaN	-0.49	NaN	NaN	NaN	NaN	NaN	NaN	NaN	NaN	NaN	57.56	NaN	0.27
NaN	NaN	NaN	NaN	NaN	NaN	44.17	NaN	-0.62	NaN	NaN	NaN	NaN	NaN	NaN	NaN	NaN	NaN	57.76	NaN	0.13
NaN	NaN	NaN	NaN	NaN	NaN	44.26	NaN	-0.59	NaN	NaN	NaN	NaN	NaN	NaN	NaN	NaN	NaN	57.86	NaN	0.13
NaN	NaN	NaN	NaN	NaN	NaN	44.35	NaN	-0.73	NaN	NaN	NaN	NaN	NaN	NaN	NaN	NaN	NaN	57.96	NaN	0.16
NaN	NaN	NaN	NaN	NaN	NaN	44.45	NaN	-0.73	NaN	NaN	NaN	NaN	NaN	NaN	NaN	NaN	NaN	58.06	NaN	0.18
NaN	NaN	NaN	NaN	NaN	NaN	44.55	NaN	-0.54	NaN	NaN	NaN	NaN	NaN	NaN	NaN	NaN	NaN	58.16	NaN	0.07
NaN	NaN	NaN	NaN	NaN	NaN	44.65	NaN	-0.42	NaN	NaN	NaN	NaN	NaN	NaN	NaN	NaN	NaN	58.26	NaN	0.08
NaN	NaN	NaN	NaN	NaN	NaN	44.77	NaN	-0.57	NaN	NaN	NaN	NaN	NaN	NaN	NaN	NaN	NaN	58.36	NaN	0.1
NaN	NaN	NaN	NaN	NaN	NaN	44.88	NaN	-0.26	NaN	NaN	NaN	NaN	NaN	NaN	NaN	NaN	NaN	58.46	NaN	0.08
NaN	NaN	NaN	NaN	NaN	NaN	44.98	NaN	0.02	NaN	NaN	NaN	NaN	NaN	NaN	NaN	NaN	NaN	58.56	NaN	0.05
NaN	NaN	NaN	NaN	NaN	NaN	45.09	NaN	-0.25	NaN	NaN	NaN	NaN	NaN	NaN	NaN	NaN	NaN	59.06	NaN	-0.11
NaN	NaN	NaN	NaN	NaN	NaN	45.18	NaN	0.06	NaN	NaN	NaN	NaN	NaN	NaN	NaN	NaN	NaN	59.36	NaN	-0.55
NaN	NaN	NaN	NaN	NaN	NaN	45.27	NaN	-0.21	NaN	NaN	NaN	NaN	NaN	NaN	NaN	NaN	NaN	59.46	NaN	-0.39
NaN	NaN	NaN	NaN	NaN	NaN	45.36	NaN	-0.17	NaN	NaN	NaN	NaN	NaN	NaN	NaN	NaN	NaN	59.56	NaN	-0.14
NaN	NaN	NaN	NaN	NaN	NaN	45.45	NaN	-0.75	NaN	NaN	NaN	NaN	NaN	NaN	NaN	NaN	NaN	59.66	NaN	-0.4
NaN	NaN	NaN	NaN	NaN	NaN	45.55	NaN	-0.92	NaN	NaN	NaN	NaN	NaN	NaN	NaN	NaN	NaN	59.86	NaN	-0.36
NaN	NaN	NaN	NaN	NaN	NaN	45.66	NaN	-0.6	NaN	NaN	NaN	NaN	NaN	NaN	NaN	NaN	NaN	59.96	NaN	-0.42
NaN	NaN	NaN	NaN	NaN	NaN	45.77	NaN	-0.6	NaN	NaN	NaN	NaN	NaN	NaN	NaN	NaN	NaN	60.06	NaN	-0.37
NaN	NaN	NaN	NaN	NaN	NaN	45.83	NaN	-0.59	NaN	NaN	NaN	NaN	NaN	NaN	NaN	NaN	NaN	60.16	NaN	-0.56
NaN	NaN	NaN	NaN	NaN	NaN	45.87	NaN	-0.75	NaN	NaN	NaN	NaN	NaN	NaN	NaN	NaN	NaN	60.26	NaN	-0.61
NaN	NaN	NaN	NaN	NaN	NaN	45.9	NaN	-0.68	NaN	NaN	NaN	NaN	NaN	NaN	NaN	NaN	NaN	60.36	NaN	-0.12
NaN	NaN	NaN	NaN	NaN	NaN	45.94	NaN	-0.7	NaN	NaN	NaN	NaN	NaN	NaN	NaN	NaN	NaN	60.56	NaN	-0.07
NaN	NaN	NaN	NaN	NaN	NaN	46.01	NaN	-0.59	NaN	NaN	NaN	NaN	NaN	NaN	NaN	NaN	NaN	60.66	NaN	-0.32
NaN	NaN	NaN	NaN	NaN	NaN	46.11	NaN	-0.5	NaN	NaN	NaN	NaN	NaN	NaN	NaN	NaN	NaN	60.86	NaN	0.03
NaN	NaN	NaN	NaN	NaN	NaN	46.22	NaN	-0.54	NaN	NaN	NaN	NaN	NaN	NaN	NaN	NaN	NaN	60.96	NaN	-0.11
NaN	NaN	NaN	NaN	NaN	NaN	46.34	NaN	-0.44	NaN	NaN	NaN	NaN	NaN	NaN	NaN	NaN	NaN	61.06	NaN	-0.1
NaN	NaN	NaN	NaN	NaN	NaN	46.43	NaN	-0.34	NaN	NaN	NaN	NaN	NaN	NaN	NaN	NaN	NaN	61.16	NaN	-0.22
NaN	NaN	NaN	NaN	NaN	NaN	46.53	NaN	-0.38	NaN	NaN	NaN	NaN	NaN	NaN	NaN	NaN	NaN	61.26	NaN	-0.2
NaN	NaN	NaN	NaN	NaN	NaN	46.63	NaN	-0.34	NaN	NaN	NaN	NaN	NaN	NaN	NaN	NaN	NaN	61.56	NaN	-0.24
NaN	NaN	NaN	NaN	NaN	NaN	46.73	NaN	-0.14	NaN	NaN	NaN	NaN	NaN	NaN	NaN	NaN	NaN	61.66	NaN	-0.52
NaN	NaN	NaN	NaN	NaN	NaN	46.83	NaN	-0.12	NaN	NaN	NaN	NaN	NaN	NaN	NaN	NaN	NaN	61.76	NaN	-0.65
NaN	NaN	NaN	NaN	NaN	NaN	46.94	NaN	-0.19	NaN	NaN	NaN	NaN	NaN	NaN	NaN	NaN	NaN	61.86	NaN	-0.65
NaN	NaN	NaN	NaN	NaN	NaN	47.04	NaN	-0.15	NaN	NaN	NaN	NaN	NaN	NaN	NaN	NaN	NaN	61.96	NaN	-0.46
NaN	NaN	NaN	NaN	NaN	NaN	47.13	NaN	-0.22	NaN	NaN	NaN	NaN	NaN	NaN	NaN	NaN	NaN	62.06	NaN	-0.38
NaN	NaN	NaN	NaN	NaN	NaN	47.23	NaN	-0.28	NaN	NaN	NaN	NaN	NaN	NaN	NaN	NaN	NaN	62.16	NaN	-0.3
NaN	NaN	NaN	NaN	NaN	NaN	47.33	NaN	-0.31	NaN	NaN	NaN	NaN	NaN	NaN	NaN	NaN	NaN	62.26	NaN	-0.42
NaN	NaN	NaN	NaN	NaN	NaN	47.43	NaN	-0.54	NaN	NaN	NaN	NaN	NaN	NaN	NaN	NaN	NaN	62.36	NaN	-0.29
NaN	NaN	NaN	NaN	NaN	NaN	47.53	NaN	-0.55	NaN	NaN	NaN	NaN	NaN	NaN	NaN	NaN	NaN	62.46	NaN	-0.49
NaN	NaN	NaN	NaN	NaN	NaN	47.63	NaN	-0.52	NaN	NaN	NaN	NaN	NaN	NaN	NaN	NaN	NaN	62.56	NaN	-0.15
NaN	NaN	NaN	NaN	NaN	NaN	47.73	NaN	-0.58	NaN	NaN	NaN	NaN	NaN	NaN	NaN	NaN	NaN	62.66	NaN	-0.27
NaN	NaN	NaN	NaN	NaN	NaN	47.83	NaN	-0.59	NaN	NaN	NaN	NaN	NaN	NaN	NaN	NaN	NaN	62.76	NaN	-0.02
NaN	NaN	NaN	NaN	NaN	NaN	47.9	NaN	-0.33	NaN	NaN	NaN	NaN	NaN	NaN	NaN	NaN	NaN	62.86	NaN	0.07
NaN	NaN	NaN	NaN	NaN	NaN	48	NaN	-0.4	NaN	NaN	NaN	NaN	NaN	NaN	NaN	NaN	NaN	62.96	NaN	0.03
NaN	NaN	NaN	NaN	NaN	NaN	48.06	NaN	-0.43	NaN	NaN	NaN	NaN	NaN	NaN	NaN	NaN	NaN	63.06	NaN	-0.1
NaN	NaN	NaN	NaN	NaN	NaN	48.13	NaN	-0.48	NaN	NaN	NaN	NaN	NaN	NaN	NaN	NaN	NaN	63.16	NaN	-0.31
NaN	NaN	NaN	NaN	NaN	NaN	48.2	NaN	-0.59	NaN	NaN	NaN	NaN	NaN	NaN	NaN	NaN	NaN	63.26	NaN	-0.08
NaN	NaN	NaN	NaN	NaN	NaN	48.31	NaN	-0.65	NaN	NaN	NaN	NaN	NaN	NaN	NaN	NaN	NaN	63.36	NaN	-0.4
NaN	NaN	NaN	NaN	NaN	NaN	48.43	NaN	-0.41	NaN	NaN	NaN	NaN	NaN	NaN	NaN	NaN	NaN	63.46	NaN	-0.49
NaN	NaN	NaN	NaN	NaN	NaN	48.58	NaN	-0.23	NaN	NaN	NaN	NaN	NaN	NaN	NaN	NaN	NaN	63.56	NaN	-0.37
NaN	NaN	NaN	NaN	NaN	NaN	48.73	NaN	-0.28	NaN	NaN	NaN	NaN	NaN	NaN	NaN	NaN	NaN	63.66	NaN	-0.63
NaN	NaN	NaN	NaN	NaN	NaN	48.86	NaN	-0.14	NaN	NaN	NaN	NaN	NaN	NaN	NaN	NaN	NaN	63.76	NaN	-0.34
NaN	NaN	NaN	NaN	NaN	NaN	48.95	NaN	-0.01	NaN	NaN	NaN	NaN	NaN	NaN	NaN	NaN	NaN	63.86	NaN	-0.55
NaN	NaN	NaN	NaN	NaN	NaN	49.04	NaN	-0.24	NaN	NaN	NaN	NaN	NaN	NaN	NaN	NaN	NaN	63.96	NaN	-0.52
NaN	NaN	NaN	NaN	NaN	NaN	49.1	NaN	-0.14	NaN	NaN	NaN	NaN	NaN	NaN	NaN	NaN	NaN	64.06	NaN	-0.33
NaN	NaN	NaN	NaN	NaN	NaN	49.18	NaN	-0.29	NaN	NaN	NaN	NaN	NaN	NaN	NaN	NaN	NaN	64.26	NaN	-0.17
NaN	NaN	NaN	NaN	NaN	NaN	49.24	NaN	-0.29	NaN	NaN	NaN	NaN	NaN	NaN	NaN	NaN	NaN	64.36	NaN	-0.03
NaN	NaN	NaN	NaN	NaN	NaN	49.29	NaN	-0.42	NaN	NaN	NaN	NaN	NaN	NaN	NaN	NaN	NaN	64.66	NaN	-0.01
NaN	NaN	NaN	NaN	NaN	NaN	49.36	NaN	-0.52	NaN	NaN	NaN	NaN	NaN	NaN	NaN	NaN	NaN	64.96	NaN	-0.33
NaN	NaN	NaN	NaN	NaN	NaN	49.43	NaN	-0.67	NaN	NaN	NaN	NaN	NaN	NaN	NaN	NaN	NaN	65.06	NaN	-0.26
NaN	NaN	NaN	NaN	NaN	NaN	49.49	NaN	-0.64	NaN	NaN	NaN	NaN	NaN	NaN	NaN	NaN	NaN	65.16	NaN	-0.33
NaN	NaN	NaN	NaN	NaN	NaN	49.58	NaN	-0.6	NaN	NaN	NaN	NaN	NaN	NaN	NaN	NaN	NaN	65.26	NaN	-0.47
NaN	NaN	NaN	NaN	NaN	NaN	49.68	NaN	-0.58	NaN	NaN	NaN	NaN	NaN	NaN	NaN	NaN	NaN	65.36	NaN	-0.58
NaN	NaN	NaN	NaN	NaN	NaN	49.79	NaN	-0.58	NaN	NaN	NaN	NaN	NaN	NaN	NaN	NaN	NaN	65.46	NaN	-0.39
NaN	NaN	NaN	NaN	NaN	NaN	50.05	NaN	-0.44	NaN	NaN	NaN	NaN	NaN	NaN	NaN	NaN	NaN	65.56	NaN	-0.48
NaN	NaN	NaN	NaN	NaN	NaN	50.15	NaN	-0.25	NaN	NaN	NaN	NaN	NaN	NaN	NaN	NaN	NaN	65.66	NaN	-0.45
NaN	NaN	NaN	NaN	NaN	NaN	50.26	NaN	0.01	NaN	NaN	NaN	NaN	NaN	NaN	NaN	NaN	NaN	65.76	NaN	-0.48
NaN	NaN	NaN	NaN	NaN	NaN	50.36	NaN	-0.06	NaN	NaN	NaN	NaN	NaN	NaN	NaN	NaN	NaN	65.86	NaN	-0.64
NaN	NaN	NaN	NaN	NaN	NaN	50.44	NaN	0.02	NaN	NaN	NaN	NaN	NaN	NaN	NaN	NaN	NaN	65.96	NaN	0.13
NaN	NaN	NaN	NaN	NaN	NaN	50.55	NaN	-0.08	NaN	NaN	NaN	NaN	NaN	NaN	NaN	NaN	NaN	66.06	NaN	-0.17
NaN	NaN	NaN	NaN	NaN	NaN	50.65	NaN	-0.35	NaN	NaN	NaN	NaN	NaN	NaN	NaN	NaN	NaN	66.16	NaN	-0.09
NaN	NaN	NaN	NaN	NaN	NaN	50.76	NaN	-0.23	NaN	NaN	NaN	NaN	NaN	NaN	NaN	NaN	NaN	66.26	NaN	-0.17
NaN	NaN	NaN	NaN	NaN	NaN	50.9	NaN	-0.24	NaN	NaN	NaN	NaN	NaN	NaN	NaN	NaN	NaN	66.36	NaN	0.15
NaN	NaN	NaN	NaN	NaN	NaN	51.04	NaN	-0.26	NaN	NaN	NaN	NaN	NaN	NaN	NaN	NaN	NaN	66.76	NaN	-0.15
NaN	NaN	NaN	NaN	NaN	NaN	51.14	NaN	-0.5	NaN	NaN	NaN	NaN	NaN	NaN	NaN	NaN	NaN	66.86	NaN	-0.23
NaN	NaN	NaN	NaN	NaN	NaN	51.24	NaN	-0.57	NaN	NaN	NaN	NaN	NaN	NaN	NaN	NaN	NaN	66.96	NaN	-0.49
NaN	NaN	NaN	NaN	NaN	NaN	51.4	NaN	-0.45	NaN	NaN	NaN	NaN	NaN	NaN	NaN	NaN	NaN	67.06	NaN	-0.4
NaN	NaN	NaN	NaN	NaN	NaN	51.48	NaN	-0.44	NaN	NaN	NaN	NaN	NaN	NaN	NaN	NaN	NaN	67.16	NaN	-0.41
NaN	NaN	NaN	NaN	NaN	NaN	51.55	NaN	-0.35	NaN	NaN	NaN	NaN	NaN	NaN	NaN	NaN	NaN	67.26	NaN	-0.42
NaN	NaN	NaN	NaN	NaN	NaN	51.62	NaN	-0.26	NaN	NaN	NaN	NaN	NaN	NaN	NaN	NaN	NaN	67.36	NaN	-0.36
NaN	NaN	NaN	NaN	NaN	NaN	51.71	NaN	-0.25	NaN	NaN	NaN	NaN	NaN	NaN	NaN	NaN	NaN	67.46	NaN	-0.35
NaN	NaN	NaN	NaN	NaN	NaN	51.79	NaN	-0.18	NaN	NaN	NaN	NaN	NaN	NaN	NaN	NaN	NaN	67.56	NaN	-0.3
NaN	NaN	NaN	NaN	NaN	NaN	51.88	NaN	-0.08	NaN	NaN	NaN	NaN	NaN	NaN	NaN	NaN	NaN	67.66	NaN	-0.28
NaN	NaN	NaN	NaN	NaN	NaN	51.98	NaN	-0.05	NaN	NaN	NaN	NaN	NaN	NaN	NaN	NaN	NaN	67.86	NaN	0.07
NaN	NaN	NaN	NaN	NaN	NaN	52.07	NaN	-0.05	NaN	NaN	NaN	NaN	NaN	NaN	NaN	NaN	NaN	67.96	NaN	-0.28
NaN	NaN	NaN	NaN	NaN	NaN	52.18	NaN	-0.19	NaN	NaN	NaN	NaN	NaN	NaN	NaN	NaN	NaN	68.06	NaN	0.11
NaN	NaN	NaN	NaN	NaN	NaN	52.28	NaN	-0.32	NaN	NaN	NaN	NaN	NaN	NaN	NaN	NaN	NaN	68.26	NaN	-0.2
NaN	NaN	NaN	NaN	NaN	NaN	52.39	NaN	-0.42	NaN	NaN	NaN	NaN	NaN	NaN	NaN	NaN	NaN	68.42	NaN	-0.19
NaN	NaN	NaN	NaN	NaN	NaN	52.51	NaN	-0.45	NaN	NaN	NaN	NaN	NaN	NaN	NaN	NaN	NaN	68.52	NaN	-0.25
NaN	NaN	NaN	NaN	NaN	NaN	52.63	NaN	-0.5	NaN	NaN	NaN	NaN	NaN	NaN	NaN	NaN	NaN	68.62	NaN	-0.5
NaN	NaN	NaN	NaN	NaN	NaN	52.75	NaN	-0.44	NaN	NaN	NaN	NaN	NaN	NaN	NaN	NaN	NaN	68.72	NaN	-0.38
NaN	NaN	NaN	NaN	NaN	NaN	52.85	NaN	-0.51	NaN	NaN	NaN	NaN	NaN	NaN	NaN	NaN	NaN	68.92	NaN	-0.52
NaN	NaN	NaN	NaN	NaN	NaN	52.95	NaN	-0.32	NaN	NaN	NaN	NaN	NaN	NaN	NaN	NaN	NaN	69.12	NaN	-0.38
NaN	NaN	NaN	NaN	NaN	NaN	53.03	NaN	-0.54	NaN	NaN	NaN	NaN	NaN	NaN	NaN	NaN	NaN	69.22	NaN	-0.32
NaN	NaN	NaN	NaN	NaN	NaN	53.11	NaN	-0.09	NaN	NaN	NaN	NaN	NaN	NaN	NaN	NaN	NaN	69.32	NaN	-0.26
NaN	NaN	NaN	NaN	NaN	NaN	53.19	NaN	-0.12	NaN	NaN	NaN	NaN	NaN	NaN	NaN	NaN	NaN	69.42	NaN	-0.23
NaN	NaN	NaN	NaN	NaN	NaN	53.28	NaN	0.03	NaN	NaN	NaN	NaN	NaN	NaN	NaN	NaN	NaN	69.52	NaN	-0.13
NaN	NaN	NaN	NaN	NaN	NaN	53.37	NaN	-0.11	NaN	NaN	NaN	NaN	NaN	NaN	NaN	NaN	NaN	69.62	NaN	-0.04
NaN	NaN	NaN	NaN	NaN	NaN	53.47	NaN	-0.04	NaN	NaN	NaN	NaN	NaN	NaN	NaN	NaN	NaN	69.72	NaN	0
NaN	NaN	NaN	NaN	NaN	NaN	53.57	NaN	-0.3	NaN	NaN	NaN	NaN	NaN	NaN	NaN	NaN	NaN	69.82	NaN	0.14
NaN	NaN	NaN	NaN	NaN	NaN	53.68	NaN	-0.38	NaN	NaN	NaN	NaN	NaN	NaN	NaN	NaN	NaN	70.12	NaN	-0.15
NaN	NaN	NaN	NaN	NaN	NaN	53.79	NaN	-0.5	NaN	NaN	NaN	NaN	NaN	NaN	NaN	NaN	NaN	70.22	NaN	-0.06
NaN	NaN	NaN	NaN	NaN	NaN	53.88	NaN	-0.54	NaN	NaN	NaN	NaN	NaN	NaN	NaN	NaN	NaN	70.42	NaN	-0.31
NaN	NaN	NaN	NaN	NaN	NaN	53.98	NaN	-0.65	NaN	NaN	NaN	NaN	NaN	NaN	NaN	NaN	NaN	70.52	NaN	-0.74
NaN	NaN	NaN	NaN	NaN	NaN	54.07	NaN	-0.46	NaN	NaN	NaN	NaN	NaN	NaN	NaN	NaN	NaN	70.72	NaN	-0.46
NaN	NaN	NaN	NaN	NaN	NaN	54.16	NaN	-0.53	NaN	NaN	NaN	NaN	NaN	NaN	NaN	NaN	NaN	70.82	NaN	-0.51
NaN	NaN	NaN	NaN	NaN	NaN	54.26	NaN	-0.36	NaN	NaN	NaN	NaN	NaN	NaN	NaN	NaN	NaN	70.92	NaN	-0.27
NaN	NaN	NaN	NaN	NaN	NaN	54.37	NaN	-0.24	NaN	NaN	NaN	NaN	NaN	NaN	NaN	NaN	NaN	71.02	NaN	-0.34
NaN	NaN	NaN	NaN	NaN	NaN	54.47	NaN	-0.11	NaN	NaN	NaN	NaN	NaN	NaN	NaN	NaN	NaN	71.22	NaN	-0.25
NaN	NaN	NaN	NaN	NaN	NaN	54.58	NaN	-0.03	NaN	NaN	NaN	NaN	NaN	NaN	NaN	NaN	NaN	71.32	NaN	0.07
NaN	NaN	NaN	NaN	NaN	NaN	54.68	NaN	0.11	NaN	NaN	NaN	NaN	NaN	NaN	NaN	NaN	NaN	71.42	NaN	0.02
NaN	NaN	NaN	NaN	NaN	NaN	54.78	NaN	0.22	NaN	NaN	NaN	NaN	NaN	NaN	NaN	NaN	NaN	71.52	NaN	-0.34
NaN	NaN	NaN	NaN	NaN	NaN	54.88	NaN	0.06	NaN	NaN	NaN	NaN	NaN	NaN	NaN	NaN	NaN	71.62	NaN	0.18
NaN	NaN	NaN	NaN	NaN	NaN	54.97	NaN	-0.1	NaN	NaN	NaN	NaN	NaN	NaN	NaN	NaN	NaN	71.72	NaN	0.28
NaN	NaN	NaN	NaN	NaN	NaN	55.07	NaN	-0.12	NaN	NaN	NaN	NaN	NaN	NaN	NaN	NaN	NaN	71.82	NaN	0.22
NaN	NaN	NaN	NaN	NaN	NaN	55.17	NaN	-0.34	NaN	NaN	NaN	NaN	NaN	NaN	NaN	NaN	NaN	71.92	NaN	0.06
NaN	NaN	NaN	NaN	NaN	NaN	55.28	NaN	-0.44	NaN	NaN	NaN	NaN	NaN	NaN	NaN	NaN	NaN	72.02	NaN	0.11
NaN	NaN	NaN	NaN	NaN	NaN	55.38	NaN	-0.58	NaN	NaN	NaN	NaN	NaN	NaN	NaN	NaN	NaN	72.12	NaN	0.15
NaN	NaN	NaN	NaN	NaN	NaN	55.49	NaN	-0.17	NaN	NaN	NaN	NaN	NaN	NaN	NaN	NaN	NaN	72.22	NaN	0.18
NaN	NaN	NaN	NaN	NaN	NaN	55.59	NaN	0.03	NaN	NaN	NaN	NaN	NaN	NaN	NaN	NaN	NaN	72.32	NaN	-0.39
NaN	NaN	NaN	NaN	NaN	NaN	55.68	NaN	-0.03	NaN	NaN	NaN	NaN	NaN	NaN	NaN	NaN	NaN	72.42	NaN	-0.29
NaN	NaN	NaN	NaN	NaN	NaN	55.78	NaN	-0.09	NaN	NaN	NaN	NaN	NaN	NaN	NaN	NaN	NaN	72.52	NaN	-0.04
NaN	NaN	NaN	NaN	NaN	NaN	55.88	NaN	-0.37	NaN	NaN	NaN	NaN	NaN	NaN	NaN	NaN	NaN	72.62	NaN	-0.11
NaN	NaN	NaN	NaN	NaN	NaN	56.07	NaN	-0.65	NaN	NaN	NaN	NaN	NaN	NaN	NaN	NaN	NaN	72.72	NaN	-0.19
NaN	NaN	NaN	NaN	NaN	NaN	56.17	NaN	-0.64	NaN	NaN	NaN	NaN	NaN	NaN	NaN	NaN	NaN	72.82	NaN	0.01
NaN	NaN	NaN	NaN	NaN	NaN	56.27	NaN	-0.5	NaN	NaN	NaN	NaN	NaN	NaN	NaN	NaN	NaN	72.92	NaN	0.14
NaN	NaN	NaN	NaN	NaN	NaN	56.36	NaN	-0.66	NaN	NaN	NaN	NaN	NaN	NaN	NaN	NaN	NaN	73.02	NaN	0.3
NaN	NaN	NaN	NaN	NaN	NaN	56.47	NaN	-0.15	NaN	NaN	NaN	NaN	NaN	NaN	NaN	NaN	NaN	73.12	NaN	-0.04
NaN	NaN	NaN	NaN	NaN	NaN	56.59	NaN	-0.05	NaN	NaN	NaN	NaN	NaN	NaN	NaN	NaN	NaN	73.22	NaN	0.11
NaN	NaN	NaN	NaN	NaN	NaN	56.71	NaN	-0.23	NaN	NaN	NaN	NaN	NaN	NaN	NaN	NaN	NaN	73.32	NaN	0.27
NaN	NaN	NaN	NaN	NaN	NaN	56.84	NaN	-0.12	NaN	NaN	NaN	NaN	NaN	NaN	NaN	NaN	NaN	73.42	NaN	0.21
NaN	NaN	NaN	NaN	NaN	NaN	56.98	NaN	-0.02	NaN	NaN	NaN	NaN	NaN	NaN	NaN	NaN	NaN	73.52	NaN	0.14
NaN	NaN	NaN	NaN	NaN	NaN	57.12	NaN	0.12	NaN	NaN	NaN	NaN	NaN	NaN	NaN	NaN	NaN	73.62	NaN	-0.3
NaN	NaN	NaN	NaN	NaN	NaN	57.24	NaN	0.01	NaN	NaN	NaN	NaN	NaN	NaN	NaN	NaN	NaN	73.72	NaN	-0.29
NaN	NaN	NaN	NaN	NaN	NaN	57.36	NaN	-0.02	NaN	NaN	NaN	NaN	NaN	NaN	NaN	NaN	NaN	73.82	NaN	-0.28
NaN	NaN	NaN	NaN	NaN	NaN	57.43	NaN	-0.13	NaN	NaN	NaN	NaN	NaN	NaN	NaN	NaN	NaN	73.92	NaN	-0.44
NaN	NaN	NaN	NaN	NaN	NaN	57.48	NaN	-0.1	NaN	NaN	NaN	NaN	NaN	NaN	NaN	NaN	NaN	74.02	NaN	-0.37
NaN	NaN	NaN	NaN	NaN	NaN	57.58	NaN	-0.34	NaN	NaN	NaN	NaN	NaN	NaN	NaN	NaN	NaN	74.12	NaN	-0.27
NaN	NaN	NaN	NaN	NaN	NaN	57.65	NaN	-0.3	NaN	NaN	NaN	NaN	NaN	NaN	NaN	NaN	NaN	74.22	NaN	-0.28
NaN	NaN	NaN	NaN	NaN	NaN	57.68	NaN	-0.16	NaN	NaN	NaN	NaN	NaN	NaN	NaN	NaN	NaN	74.32	NaN	-0.33
NaN	NaN	NaN	NaN	NaN	NaN	57.76	NaN	-0.24	NaN	NaN	NaN	NaN	NaN	NaN	NaN	NaN	NaN	74.42	NaN	0.09
NaN	NaN	NaN	NaN	NaN	NaN	57.78	NaN	-0.19	NaN	NaN	NaN	NaN	NaN	NaN	NaN	NaN	NaN	74.52	NaN	-0.32
NaN	NaN	NaN	NaN	NaN	NaN	57.92	NaN	-0.2	NaN	NaN	NaN	NaN	NaN	NaN	NaN	NaN	NaN	74.62	NaN	0.33
NaN	NaN	NaN	NaN	NaN	NaN	57.97	NaN	-0.3	NaN	NaN	NaN	NaN	NaN	NaN	NaN	NaN	NaN	74.72	NaN	-0.07
NaN	NaN	NaN	NaN	NaN	NaN	57.99	NaN	-0.17	NaN	NaN	NaN	NaN	NaN	NaN	NaN	NaN	NaN	74.82	NaN	-0.11
NaN	NaN	NaN	NaN	NaN	NaN	58.08	NaN	-0.14	NaN	NaN	NaN	NaN	NaN	NaN	NaN	NaN	NaN	74.92	NaN	-0.08
NaN	NaN	NaN	NaN	NaN	NaN	58.18	NaN	-0.13	NaN	NaN	NaN	NaN	NaN	NaN	NaN	NaN	NaN	75.02	NaN	-0.13
NaN	NaN	NaN	NaN	NaN	NaN	58.21	NaN	-0.08	NaN	NaN	NaN	NaN	NaN	NaN	NaN	NaN	NaN	75.12	NaN	0.07
NaN	NaN	NaN	NaN	NaN	NaN	58.25	NaN	0.28	NaN	NaN	NaN	NaN	NaN	NaN	NaN	NaN	NaN	75.22	NaN	0.01
NaN	NaN	NaN	NaN	NaN	NaN	58.28	NaN	0.12	NaN	NaN	NaN	NaN	NaN	NaN	NaN	NaN	NaN	75.32	NaN	0.16
NaN	NaN	NaN	NaN	NaN	NaN	58.31	NaN	0.02	NaN	NaN	NaN	NaN	NaN	NaN	NaN	NaN	NaN	75.42	NaN	0.1
NaN	NaN	NaN	NaN	NaN	NaN	58.36	NaN	-0.07	NaN	NaN	NaN	NaN	NaN	NaN	NaN	NaN	NaN	75.52	NaN	0.13
NaN	NaN	NaN	NaN	NaN	NaN	58.38	NaN	-0.03	NaN	NaN	NaN	NaN	NaN	NaN	NaN	NaN	NaN	75.62	NaN	-0.16
NaN	NaN	NaN	NaN	NaN	NaN	58.43	NaN	-0.07	NaN	NaN	NaN	NaN	NaN	NaN	NaN	NaN	NaN	75.72	NaN	-0.19
NaN	NaN	NaN	NaN	NaN	NaN	58.48	NaN	0	NaN	NaN	NaN	NaN	NaN	NaN	NaN	NaN	NaN	75.82	NaN	-0.21
NaN	NaN	NaN	NaN	NaN	NaN	58.53	NaN	-0.23	NaN	NaN	NaN	NaN	NaN	NaN	NaN	NaN	NaN	75.92	NaN	-0.14
NaN	NaN	NaN	NaN	NaN	NaN	58.56	NaN	-0.23	NaN	NaN	NaN	NaN	NaN	NaN	NaN	NaN	NaN	76.02	NaN	-0.28
NaN	NaN	NaN	NaN	NaN	NaN	58.59	NaN	-0.16	NaN	NaN	NaN	NaN	NaN	NaN	NaN	NaN	NaN	76.12	NaN	-0.21
NaN	NaN	NaN	NaN	NaN	NaN	58.68	NaN	-0.04	NaN	NaN	NaN	NaN	NaN	NaN	NaN	NaN	NaN	76.24	NaN	-0.27
NaN	NaN	NaN	NaN	NaN	NaN	58.78	NaN	-0.1	NaN	NaN	NaN	NaN	NaN	NaN	NaN	NaN	NaN	76.34	NaN	-0.22
NaN	NaN	NaN	NaN	NaN	NaN	58.88	NaN	-0.11	NaN	NaN	NaN	NaN	NaN	NaN	NaN	NaN	NaN	76.44	NaN	-0.07
NaN	NaN	NaN	NaN	NaN	NaN	58.97	NaN	-0.09	NaN	NaN	NaN	NaN	NaN	NaN	NaN	NaN	NaN	76.54	NaN	-0.11
NaN	NaN	NaN	NaN	NaN	NaN	59.07	NaN	0.07	NaN	NaN	NaN	NaN	NaN	NaN	NaN	NaN	NaN	76.64	NaN	-0.05
NaN	NaN	NaN	NaN	NaN	NaN	59.14	NaN	-0.5	NaN	NaN	NaN	NaN	NaN	NaN	NaN	NaN	NaN	76.84	NaN	-0.23
NaN	NaN	NaN	NaN	NaN	NaN	59.2	NaN	0.02	NaN	NaN	NaN	NaN	NaN	NaN	NaN	NaN	NaN	76.94	NaN	-0.06
NaN	NaN	NaN	NaN	NaN	NaN	59.24	NaN	-0.3	NaN	NaN	NaN	NaN	NaN	NaN	NaN	NaN	NaN	77.04	NaN	0.01
NaN	NaN	NaN	NaN	NaN	NaN	59.29	NaN	-0.37	NaN	NaN	NaN	NaN	NaN	NaN	NaN	NaN	NaN	77.14	NaN	-0.01
NaN	NaN	NaN	NaN	NaN	NaN	59.35	NaN	-0.34	NaN	NaN	NaN	NaN	NaN	NaN	NaN	NaN	NaN	77.24	NaN	0.06
NaN	NaN	NaN	NaN	NaN	NaN	59.41	NaN	-0.03	NaN	NaN	NaN	NaN	NaN	NaN	NaN	NaN	NaN	77.34	NaN	0.11
NaN	NaN	NaN	NaN	NaN	NaN	59.53	NaN	-0.57	NaN	NaN	NaN	NaN	NaN	NaN	NaN	NaN	NaN	77.44	NaN	0.31
NaN	NaN	NaN	NaN	NaN	NaN	59.7	NaN	-0.6	NaN	NaN	NaN	NaN	NaN	NaN	NaN	NaN	NaN	77.54	NaN	0.04
NaN	NaN	NaN	NaN	NaN	NaN	59.98	NaN	-0.6	NaN	NaN	NaN	NaN	NaN	NaN	NaN	NaN	NaN	77.84	NaN	-0.07
NaN	NaN	NaN	NaN	NaN	NaN	60.29	NaN	-0.57	NaN	NaN	NaN	NaN	NaN	NaN	NaN	NaN	NaN	77.94	NaN	-0.02
NaN	NaN	NaN	NaN	NaN	NaN	60.37	NaN	-0.47	NaN	NaN	NaN	NaN	NaN	NaN	NaN	NaN	NaN	78.04	NaN	-0.03
NaN	NaN	NaN	NaN	NaN	NaN	60.41	NaN	-0.69	NaN	NaN	NaN	NaN	NaN	NaN	NaN	NaN	NaN	78.14	NaN	-0.03
NaN	NaN	NaN	NaN	NaN	NaN	60.44	NaN	-0.63	NaN	NaN	NaN	NaN	NaN	NaN	NaN	NaN	NaN	78.24	NaN	-0.18
NaN	NaN	NaN	NaN	NaN	NaN	60.46	NaN	-0.53	NaN	NaN	NaN	NaN	NaN	NaN	NaN	NaN	NaN	78.34	NaN	-0.12
NaN	NaN	NaN	NaN	NaN	NaN	60.49	NaN	-0.39	NaN	NaN	NaN	NaN	NaN	NaN	NaN	NaN	NaN	78.44	NaN	0.01
NaN	NaN	NaN	NaN	NaN	NaN	60.52	NaN	-0.4	NaN	NaN	NaN	NaN	NaN	NaN	NaN	NaN	NaN	78.54	NaN	0.21
NaN	NaN	NaN	NaN	NaN	NaN	60.57	NaN	-0.21	NaN	NaN	NaN	NaN	NaN	NaN	NaN	NaN	NaN	78.64	NaN	0.09
NaN	NaN	NaN	NaN	NaN	NaN	60.75	NaN	-0.14	NaN	NaN	NaN	NaN	NaN	NaN	NaN	NaN	NaN	78.74	NaN	0.14
NaN	NaN	NaN	NaN	NaN	NaN	61.2	NaN	-0.1	NaN	NaN	NaN	NaN	NaN	NaN	NaN	NaN	NaN	78.94	NaN	0.19
NaN	NaN	NaN	NaN	NaN	NaN	61.28	NaN	-0.26	NaN	NaN	NaN	NaN	NaN	NaN	NaN	NaN	NaN	79.04	NaN	-0.03
NaN	NaN	NaN	NaN	NaN	NaN	61.31	NaN	-0.41	NaN	NaN	NaN	NaN	NaN	NaN	NaN	NaN	NaN	79.14	NaN	-0.03
NaN	NaN	NaN	NaN	NaN	NaN	61.33	NaN	-0.29	NaN	NaN	NaN	NaN	NaN	NaN	NaN	NaN	NaN	79.24	NaN	-0.33
NaN	NaN	NaN	NaN	NaN	NaN	61.36	NaN	-0.51	NaN	NaN	NaN	NaN	NaN	NaN	NaN	NaN	NaN	79.34	NaN	-0.13
NaN	NaN	NaN	NaN	NaN	NaN	61.38	NaN	-0.79	NaN	NaN	NaN	NaN	NaN	NaN	NaN	NaN	NaN	79.48	NaN	-0.13
NaN	NaN	NaN	NaN	NaN	NaN	61.43	NaN	-0.57	NaN	NaN	NaN	NaN	NaN	NaN	NaN	NaN	NaN	79.58	NaN	-0.1
NaN	NaN	NaN	NaN	NaN	NaN	61.47	NaN	-1	NaN	NaN	NaN	NaN	NaN	NaN	NaN	NaN	NaN	79.68	NaN	-0.16
NaN	NaN	NaN	NaN	NaN	NaN	61.54	NaN	-0.72	NaN	NaN	NaN	NaN	NaN	NaN	NaN	NaN	NaN	79.78	NaN	-0.54
NaN	NaN	NaN	NaN	NaN	NaN	61.67	NaN	-0.87	NaN	NaN	NaN	NaN	NaN	NaN	NaN	NaN	NaN	79.88	NaN	-0.52
NaN	NaN	NaN	NaN	NaN	NaN	61.92	NaN	-0.47	NaN	NaN	NaN	NaN	NaN	NaN	NaN	NaN	NaN	79.98	NaN	-0.03
NaN	NaN	NaN	NaN	NaN	NaN	62.09	NaN	-0.32	NaN	NaN	NaN	NaN	NaN	NaN	NaN	NaN	NaN	80.08	NaN	-0.1
NaN	NaN	NaN	NaN	NaN	NaN	62.16	NaN	-0.51	NaN	NaN	NaN	NaN	NaN	NaN	NaN	NaN	NaN	80.18	NaN	-0.12
NaN	NaN	NaN	NaN	NaN	NaN	62.22	NaN	-0.5	NaN	NaN	NaN	NaN	NaN	NaN	NaN	NaN	NaN	80.28	NaN	-0.32
NaN	NaN	NaN	NaN	NaN	NaN	62.26	NaN	-0.67	NaN	NaN	NaN	NaN	NaN	NaN	NaN	NaN	NaN	80.38	NaN	-0.12
NaN	NaN	NaN	NaN	NaN	NaN	62.32	NaN	-0.46	NaN	NaN	NaN	NaN	NaN	NaN	NaN	NaN	NaN	80.48	NaN	-0.1
NaN	NaN	NaN	NaN	NaN	NaN	62.48	NaN	-0.4	NaN	NaN	NaN	NaN	NaN	NaN	NaN	NaN	NaN	80.58	NaN	-0.08
NaN	NaN	NaN	NaN	NaN	NaN	62.7	NaN	-0.39	NaN	NaN	NaN	NaN	NaN	NaN	NaN	NaN	NaN	80.68	NaN	-0.08
NaN	NaN	NaN	NaN	NaN	NaN	62.83	NaN	-0.85	NaN	NaN	NaN	NaN	NaN	NaN	NaN	NaN	NaN	80.78	NaN	-0.07
NaN	NaN	NaN	NaN	NaN	NaN	62.91	NaN	-0.68	NaN	NaN	NaN	NaN	NaN	NaN	NaN	NaN	NaN	80.88	NaN	-0.02
NaN	NaN	NaN	NaN	NaN	NaN	62.95	NaN	-0.74	NaN	NaN	NaN	NaN	NaN	NaN	NaN	NaN	NaN	80.98	NaN	0.01
NaN	NaN	NaN	NaN	NaN	NaN	63.03	NaN	-0.52	NaN	NaN	NaN	NaN	NaN	NaN	NaN	NaN	NaN	81.08	NaN	-0.1
NaN	NaN	NaN	NaN	NaN	NaN	63.08	NaN	-0.56	NaN	NaN	NaN	NaN	NaN	NaN	NaN	NaN	NaN	81.18	NaN	-0.01
NaN	NaN	NaN	NaN	NaN	NaN	63.14	NaN	-0.51	NaN	NaN	NaN	NaN	NaN	NaN	NaN	NaN	NaN	81.28	NaN	-0.34
NaN	NaN	NaN	NaN	NaN	NaN	63.22	NaN	-0.53	NaN	NaN	NaN	NaN	NaN	NaN	NaN	NaN	NaN	81.38	NaN	-0.37
NaN	NaN	NaN	NaN	NaN	NaN	63.43	NaN	-0.35	NaN	NaN	NaN	NaN	NaN	NaN	NaN	NaN	NaN	81.48	NaN	-0.47
NaN	NaN	NaN	NaN	NaN	NaN	63.53	NaN	-0.41	NaN	NaN	NaN	NaN	NaN	NaN	NaN	NaN	NaN	81.58	NaN	-0.39
NaN	NaN	NaN	NaN	NaN	NaN	63.63	NaN	-0.18	NaN	NaN	NaN	NaN	NaN	NaN	NaN	NaN	NaN	81.68	NaN	-0.6
NaN	NaN	NaN	NaN	NaN	NaN	63.73	NaN	-0.23	NaN	NaN	NaN	NaN	NaN	NaN	NaN	NaN	NaN	81.78	NaN	-0.52
NaN	NaN	NaN	NaN	NaN	NaN	63.82	NaN	-0.2	NaN	NaN	NaN	NaN	NaN	NaN	NaN	NaN	NaN	81.88	NaN	-0.43
NaN	NaN	NaN	NaN	NaN	NaN	63.94	NaN	-0.11	NaN	NaN	NaN	NaN	NaN	NaN	NaN	NaN	NaN	81.98	NaN	-0.5
NaN	NaN	NaN	NaN	NaN	NaN	64.03	NaN	-0.53	NaN	NaN	NaN	NaN	NaN	NaN	NaN	NaN	NaN	82.08	NaN	-0.43
NaN	NaN	NaN	NaN	NaN	NaN	64.15	NaN	-0.38	NaN	NaN	NaN	NaN	NaN	NaN	NaN	NaN	NaN	82.18	NaN	-0.21
NaN	NaN	NaN	NaN	NaN	NaN	64.28	NaN	-0.65	NaN	NaN	NaN	NaN	NaN	NaN	NaN	NaN	NaN	82.28	NaN	-0.37
NaN	NaN	NaN	NaN	NaN	NaN	64.39	NaN	-0.53	NaN	NaN	NaN	NaN	NaN	NaN	NaN	NaN	NaN	82.38	NaN	-0.19
NaN	NaN	NaN	NaN	NaN	NaN	64.54	NaN	-0.64	NaN	NaN	NaN	NaN	NaN	NaN	NaN	NaN	NaN	82.48	NaN	0.22
NaN	NaN	NaN	NaN	NaN	NaN	64.65	NaN	-0.62	NaN	NaN	NaN	NaN	NaN	NaN	NaN	NaN	NaN	82.58	NaN	-0.33
NaN	NaN	NaN	NaN	NaN	NaN	64.76	NaN	-0.55	NaN	NaN	NaN	NaN	NaN	NaN	NaN	NaN	NaN	82.68	NaN	-0.37
NaN	NaN	NaN	NaN	NaN	NaN	64.86	NaN	-0.39	NaN	NaN	NaN	NaN	NaN	NaN	NaN	NaN	NaN	82.78	NaN	-0.26
NaN	NaN	NaN	NaN	NaN	NaN	64.96	NaN	-0.61	NaN	NaN	NaN	NaN	NaN	NaN	NaN	NaN	NaN	82.88	NaN	-0.31
NaN	NaN	NaN	NaN	NaN	NaN	65.08	NaN	-0.57	NaN	NaN	NaN	NaN	NaN	NaN	NaN	NaN	NaN	82.98	NaN	-0.4
NaN	NaN	NaN	NaN	NaN	NaN	65.16	NaN	-0.42	NaN	NaN	NaN	NaN	NaN	NaN	NaN	NaN	NaN	83.08	NaN	-0.29
NaN	NaN	NaN	NaN	NaN	NaN	65.25	NaN	-0.27	NaN	NaN	NaN	NaN	NaN	NaN	NaN	NaN	NaN	83.18	NaN	-0.21
NaN	NaN	NaN	NaN	NaN	NaN	65.35	NaN	-0.31	NaN	NaN	NaN	NaN	NaN	NaN	NaN	NaN	NaN	83.28	NaN	-0.44
NaN	NaN	NaN	NaN	NaN	NaN	65.44	NaN	-0.36	NaN	NaN	NaN	NaN	NaN	NaN	NaN	NaN	NaN	83.38	NaN	-0.41
NaN	NaN	NaN	NaN	NaN	NaN	65.54	NaN	-0.44	NaN	NaN	NaN	NaN	NaN	NaN	NaN	NaN	NaN	83.48	NaN	-0.21
NaN	NaN	NaN	NaN	NaN	NaN	65.65	NaN	-0.26	NaN	NaN	NaN	NaN	NaN	NaN	NaN	NaN	NaN	83.58	NaN	-0.4
NaN	NaN	NaN	NaN	NaN	NaN	65.75	NaN	-0.27	NaN	NaN	NaN	NaN	NaN	NaN	NaN	NaN	NaN	83.68	NaN	-0.57
NaN	NaN	NaN	NaN	NaN	NaN	65.96	NaN	-0.51	NaN	NaN	NaN	NaN	NaN	NaN	NaN	NaN	NaN	83.78	NaN	-0.49
NaN	NaN	NaN	NaN	NaN	NaN	66.06	NaN	-0.6	NaN	NaN	NaN	NaN	NaN	NaN	NaN	NaN	NaN	83.88	NaN	-0.16
NaN	NaN	NaN	NaN	NaN	NaN	66.16	NaN	-0.68	NaN	NaN	NaN	NaN	NaN	NaN	NaN	NaN	NaN	83.98	NaN	-0.31
NaN	NaN	NaN	NaN	NaN	NaN	66.25	NaN	-0.52	NaN	NaN	NaN	NaN	NaN	NaN	NaN	NaN	NaN	84.08	NaN	-0.04
NaN	NaN	NaN	NaN	NaN	NaN	66.35	NaN	-0.54	NaN	NaN	NaN	NaN	NaN	NaN	NaN	NaN	NaN	84.18	NaN	0.09
NaN	NaN	NaN	NaN	NaN	NaN	66.45	NaN	-0.02	NaN	NaN	NaN	NaN	NaN	NaN	NaN	NaN	NaN	84.28	NaN	0.04
NaN	NaN	NaN	NaN	NaN	NaN	66.45	NaN	-0.34	NaN	NaN	NaN	NaN	NaN	NaN	NaN	NaN	NaN	84.38	NaN	0.11
NaN	NaN	NaN	NaN	NaN	NaN	66.56	NaN	-0.19	NaN	NaN	NaN	NaN	NaN	NaN	NaN	NaN	NaN	84.48	NaN	0.18
NaN	NaN	NaN	NaN	NaN	NaN	66.56	NaN	-0.24	NaN	NaN	NaN	NaN	NaN	NaN	NaN	NaN	NaN	84.58	NaN	0.05
NaN	NaN	NaN	NaN	NaN	NaN	66.65	NaN	-0.3	NaN	NaN	NaN	NaN	NaN	NaN	NaN	NaN	NaN	84.68	NaN	-0.11
NaN	NaN	NaN	NaN	NaN	NaN	66.65	NaN	-0.17	NaN	NaN	NaN	NaN	NaN	NaN	NaN	NaN	NaN	84.78	NaN	-0.17
NaN	NaN	NaN	NaN	NaN	NaN	66.74	NaN	-0.19	NaN	NaN	NaN	NaN	NaN	NaN	NaN	NaN	NaN	84.88	NaN	0.06
NaN	NaN	NaN	NaN	NaN	NaN	66.85	NaN	-0.17	NaN	NaN	NaN	NaN	NaN	NaN	NaN	NaN	NaN	84.98	NaN	-0.22
NaN	NaN	NaN	NaN	NaN	NaN	66.94	NaN	-0.23	NaN	NaN	NaN	NaN	NaN	NaN	NaN	NaN	NaN	85.08	NaN	-0.12
NaN	NaN	NaN	NaN	NaN	NaN	67.03	NaN	-0.3	NaN	NaN	NaN	NaN	NaN	NaN	NaN	NaN	NaN	85.18	NaN	-0.19
NaN	NaN	NaN	NaN	NaN	NaN	67.03	NaN	0	NaN	NaN	NaN	NaN	NaN	NaN	NaN	NaN	NaN	85.28	NaN	-0.19
NaN	NaN	NaN	NaN	NaN	NaN	67.14	NaN	-0.04	NaN	NaN	NaN	NaN	NaN	NaN	NaN	NaN	NaN	85.38	NaN	-0.65
NaN	NaN	NaN	NaN	NaN	NaN	67.23	NaN	-0.65	NaN	NaN	NaN	NaN	NaN	NaN	NaN	NaN	NaN	85.48	NaN	-0.23
NaN	NaN	NaN	NaN	NaN	NaN	67.24	NaN	-0.02	NaN	NaN	NaN	NaN	NaN	NaN	NaN	NaN	NaN	85.58	NaN	-0.53
NaN	NaN	NaN	NaN	NaN	NaN	67.32	NaN	-0.3	NaN	NaN	NaN	NaN	NaN	NaN	NaN	NaN	NaN	85.68	NaN	-0.2
NaN	NaN	NaN	NaN	NaN	NaN	67.32	NaN	-0.48	NaN	NaN	NaN	NaN	NaN	NaN	NaN	NaN	NaN	85.78	NaN	-0.44
NaN	NaN	NaN	NaN	NaN	NaN	67.34	NaN	-0.22	NaN	NaN	NaN	NaN	NaN	NaN	NaN	NaN	NaN	85.88	NaN	-0.42
NaN	NaN	NaN	NaN	NaN	NaN	67.41	NaN	-0.28	NaN	NaN	NaN	NaN	NaN	NaN	NaN	NaN	NaN	85.98	NaN	-0.29
NaN	NaN	NaN	NaN	NaN	NaN	67.41	NaN	-0.15	NaN	NaN	NaN	NaN	NaN	NaN	NaN	NaN	NaN	86.08	NaN	-0.27
NaN	NaN	NaN	NaN	NaN	NaN	67.52	NaN	-0.32	NaN	NaN	NaN	NaN	NaN	NaN	NaN	NaN	NaN	86.18	NaN	-0.14
NaN	NaN	NaN	NaN	NaN	NaN	67.56	NaN	-0.24	NaN	NaN	NaN	NaN	NaN	NaN	NaN	NaN	NaN	86.28	NaN	-0.23
NaN	NaN	NaN	NaN	NaN	NaN	67.72	NaN	-0.29	NaN	NaN	NaN	NaN	NaN	NaN	NaN	NaN	NaN	86.38	NaN	-0.54
NaN	NaN	NaN	NaN	NaN	NaN	67.85	NaN	-0.21	NaN	NaN	NaN	NaN	NaN	NaN	NaN	NaN	NaN	86.48	NaN	-0.14
NaN	NaN	NaN	NaN	NaN	NaN	67.85	NaN	-0.09	NaN	NaN	NaN	NaN	NaN	NaN	NaN	NaN	NaN	86.58	NaN	-0.36
NaN	NaN	NaN	NaN	NaN	NaN	67.95	NaN	0.03	NaN	NaN	NaN	NaN	NaN	NaN	NaN	NaN	NaN	86.68	NaN	-0.47
NaN	NaN	NaN	NaN	NaN	NaN	67.95	NaN	-0.22	NaN	NaN	NaN	NaN	NaN	NaN	NaN	NaN	NaN	86.78	NaN	-0.21
NaN	NaN	NaN	NaN	NaN	NaN	68.15	NaN	0	NaN	NaN	NaN	NaN	NaN	NaN	NaN	NaN	NaN	86.88	NaN	-0.24
NaN	NaN	NaN	NaN	NaN	NaN	68.25	NaN	-0.11	NaN	NaN	NaN	NaN	NaN	NaN	NaN	NaN	NaN	86.98	NaN	-0.19
NaN	NaN	NaN	NaN	NaN	NaN	68.35	NaN	-0.02	NaN	NaN	NaN	NaN	NaN	NaN	NaN	NaN	NaN	87.08	NaN	-0.13
NaN	NaN	NaN	NaN	NaN	NaN	68.45	NaN	0.01	NaN	NaN	NaN	NaN	NaN	NaN	NaN	NaN	NaN	87.18	NaN	-0.15
NaN	NaN	NaN	NaN	NaN	NaN	68.45	NaN	0.07	NaN	NaN	NaN	NaN	NaN	NaN	NaN	NaN	NaN	87.28	NaN	-0.17
NaN	NaN	NaN	NaN	NaN	NaN	68.55	NaN	-0.2	NaN	NaN	NaN	NaN	NaN	NaN	NaN	NaN	NaN	87.38	NaN	-0.3
NaN	NaN	NaN	NaN	NaN	NaN	68.55	NaN	-0.04	NaN	NaN	NaN	NaN	NaN	NaN	NaN	NaN	NaN	87.48	NaN	-0.26
NaN	NaN	NaN	NaN	NaN	NaN	68.65	NaN	-0.09	NaN	NaN	NaN	NaN	NaN	NaN	NaN	NaN	NaN	87.58	NaN	-0.5
NaN	NaN	NaN	NaN	NaN	NaN	68.65	NaN	0.03	NaN	NaN	NaN	NaN	NaN	NaN	NaN	NaN	NaN	87.68	NaN	-0.35
NaN	NaN	NaN	NaN	NaN	NaN	68.75	NaN	-0.17	NaN	NaN	NaN	NaN	NaN	NaN	NaN	NaN	NaN	87.78	NaN	-0.11
NaN	NaN	NaN	NaN	NaN	NaN	68.75	NaN	-0.05	NaN	NaN	NaN	NaN	NaN	NaN	NaN	NaN	NaN	87.88	NaN	-0.24
NaN	NaN	NaN	NaN	NaN	NaN	68.85	NaN	-0.1	NaN	NaN	NaN	NaN	NaN	NaN	NaN	NaN	NaN	87.98	NaN	-0.25
NaN	NaN	NaN	NaN	NaN	NaN	68.85	NaN	-0.18	NaN	NaN	NaN	NaN	NaN	NaN	NaN	NaN	NaN	88.08	NaN	-0.21
NaN	NaN	NaN	NaN	NaN	NaN	68.95	NaN	-0.15	NaN	NaN	NaN	NaN	NaN	NaN	NaN	NaN	NaN	88.18	NaN	-0.26
NaN	NaN	NaN	NaN	NaN	NaN	68.95	NaN	-0.31	NaN	NaN	NaN	NaN	NaN	NaN	NaN	NaN	NaN	88.28	NaN	-0.01
NaN	NaN	NaN	NaN	NaN	NaN	69.05	NaN	-0.46	NaN	NaN	NaN	NaN	NaN	NaN	NaN	NaN	NaN	88.38	NaN	-0.19
NaN	NaN	NaN	NaN	NaN	NaN	69.05	NaN	-0.35	NaN	NaN	NaN	NaN	NaN	NaN	NaN	NaN	NaN	88.48	NaN	-0.09
NaN	NaN	NaN	NaN	NaN	NaN	69.15	NaN	-0.37	NaN	NaN	NaN	NaN	NaN	NaN	NaN	NaN	NaN	88.58	NaN	-0.19
NaN	NaN	NaN	NaN	NaN	NaN	69.15	NaN	-0.36	NaN	NaN	NaN	NaN	NaN	NaN	NaN	NaN	NaN	88.68	NaN	-0.13
NaN	NaN	NaN	NaN	NaN	NaN	69.25	NaN	-0.4	NaN	NaN	NaN	NaN	NaN	NaN	NaN	NaN	NaN	88.78	NaN	-0.05
NaN	NaN	NaN	NaN	NaN	NaN	69.35	NaN	-0.27	NaN	NaN	NaN	NaN	NaN	NaN	NaN	NaN	NaN	88.88	NaN	0.19
NaN	NaN	NaN	NaN	NaN	NaN	69.35	NaN	-0.53	NaN	NaN	NaN	NaN	NaN	NaN	NaN	NaN	NaN	88.98	NaN	-0.22
NaN	NaN	NaN	NaN	NaN	NaN	69.45	NaN	-0.56	NaN	NaN	NaN	NaN	NaN	NaN	NaN	NaN	NaN	89.08	NaN	0
NaN	NaN	NaN	NaN	NaN	NaN	69.45	NaN	-0.42	NaN	NaN	NaN	NaN	NaN	NaN	NaN	NaN	NaN	89.18	NaN	0.13
NaN	NaN	NaN	NaN	NaN	NaN	69.55	NaN	-0.42	NaN	NaN	NaN	NaN	NaN	NaN	NaN	NaN	NaN	89.28	NaN	0.05
NaN	NaN	NaN	NaN	NaN	NaN	69.55	NaN	-0.46	NaN	NaN	NaN	NaN	NaN	NaN	NaN	NaN	NaN	89.38	NaN	0.09
NaN	NaN	NaN	NaN	NaN	NaN	69.65	NaN	-0.36	NaN	NaN	NaN	NaN	NaN	NaN	NaN	NaN	NaN	89.48	NaN	0.01
NaN	NaN	NaN	NaN	NaN	NaN	69.75	NaN	-0.38	NaN	NaN	NaN	NaN	NaN	NaN	NaN	NaN	NaN	89.58	NaN	0.11
NaN	NaN	NaN	NaN	NaN	NaN	69.85	NaN	-0.56	NaN	NaN	NaN	NaN	NaN	NaN	NaN	NaN	NaN	89.68	NaN	0.06
NaN	NaN	NaN	NaN	NaN	NaN	69.85	NaN	-0.46	NaN	NaN	NaN	NaN	NaN	NaN	NaN	NaN	NaN	89.78	NaN	-0.08
NaN	NaN	NaN	NaN	NaN	NaN	69.95	NaN	-0.44	NaN	NaN	NaN	NaN	NaN	NaN	NaN	NaN	NaN	89.88	NaN	-0.05
NaN	NaN	NaN	NaN	NaN	NaN	70.05	NaN	-0.41	NaN	NaN	NaN	NaN	NaN	NaN	NaN	NaN	NaN	89.92	NaN	0.1
NaN	NaN	NaN	NaN	NaN	NaN	70.05	NaN	-0.34	NaN	NaN	NaN	NaN	NaN	NaN	NaN	NaN	NaN	90.02	NaN	-0.02
NaN	NaN	NaN	NaN	NaN	NaN	70.15	NaN	-0.08	NaN	NaN	NaN	NaN	NaN	NaN	NaN	NaN	NaN	90.12	NaN	0.05
NaN	NaN	NaN	NaN	NaN	NaN	70.15	NaN	-0.19	NaN	NaN	NaN	NaN	NaN	NaN	NaN	NaN	NaN	90.22	NaN	-0.06
NaN	NaN	NaN	NaN	NaN	NaN	70.25	NaN	-0.3	NaN	NaN	NaN	NaN	NaN	NaN	NaN	NaN	NaN	90.32	NaN	-0.19
NaN	NaN	NaN	NaN	NaN	NaN	70.25	NaN	-0.33	NaN	NaN	NaN	NaN	NaN	NaN	NaN	NaN	NaN	90.42	NaN	-0.29
NaN	NaN	NaN	NaN	NaN	NaN	70.35	NaN	-0.05	NaN	NaN	NaN	NaN	NaN	NaN	NaN	NaN	NaN	90.52	NaN	-0.41
NaN	NaN	NaN	NaN	NaN	NaN	70.35	NaN	-0.19	NaN	NaN	NaN	NaN	NaN	NaN	NaN	NaN	NaN	90.62	NaN	-0.4
NaN	NaN	NaN	NaN	NaN	NaN	70.45	NaN	-0.16	NaN	NaN	NaN	NaN	NaN	NaN	NaN	NaN	NaN	90.72	NaN	-0.39
NaN	NaN	NaN	NaN	NaN	NaN	70.55	NaN	0.12	NaN	NaN	NaN	NaN	NaN	NaN	NaN	NaN	NaN	90.82	NaN	-0.44
NaN	NaN	NaN	NaN	NaN	NaN	70.65	NaN	-0.28	NaN	NaN	NaN	NaN	NaN	NaN	NaN	NaN	NaN	90.92	NaN	-0.37
NaN	NaN	NaN	NaN	NaN	NaN	70.75	NaN	-0.36	NaN	NaN	NaN	NaN	NaN	NaN	NaN	NaN	NaN	91.02	NaN	-0.29
NaN	NaN	NaN	NaN	NaN	NaN	70.75	NaN	-0.01	NaN	NaN	NaN	NaN	NaN	NaN	NaN	NaN	NaN	91.12	NaN	-0.31
NaN	NaN	NaN	NaN	NaN	NaN	70.85	NaN	-0.18	NaN	NaN	NaN	NaN	NaN	NaN	NaN	NaN	NaN	91.22	NaN	-0.43
NaN	NaN	NaN	NaN	NaN	NaN	70.85	NaN	-0.29	NaN	NaN	NaN	NaN	NaN	NaN	NaN	NaN	NaN	91.32	NaN	-0.23
NaN	NaN	NaN	NaN	NaN	NaN	70.95	NaN	-0.45	NaN	NaN	NaN	NaN	NaN	NaN	NaN	NaN	NaN	91.42	NaN	0.02
NaN	NaN	NaN	NaN	NaN	NaN	70.95	NaN	-0.09	NaN	NaN	NaN	NaN	NaN	NaN	NaN	NaN	NaN	91.52	NaN	-0.15
NaN	NaN	NaN	NaN	NaN	NaN	71.05	NaN	-0.12	NaN	NaN	NaN	NaN	NaN	NaN	NaN	NaN	NaN	91.62	NaN	-0.2
NaN	NaN	NaN	NaN	NaN	NaN	71.05	NaN	0.01	NaN	NaN	NaN	NaN	NaN	NaN	NaN	NaN	NaN	91.72	NaN	-0.15
NaN	NaN	NaN	NaN	NaN	NaN	71.15	NaN	-0.06	NaN	NaN	NaN	NaN	NaN	NaN	NaN	NaN	NaN	91.82	NaN	-0.12
NaN	NaN	NaN	NaN	NaN	NaN	71.15	NaN	-0.36	NaN	NaN	NaN	NaN	NaN	NaN	NaN	NaN	NaN	91.92	NaN	0.01
NaN	NaN	NaN	NaN	NaN	NaN	71.25	NaN	-0.26	NaN	NaN	NaN	NaN	NaN	NaN	NaN	NaN	NaN	92.02	NaN	-0.03
NaN	NaN	NaN	NaN	NaN	NaN	71.25	NaN	-0.23	NaN	NaN	NaN	NaN	NaN	NaN	NaN	NaN	NaN	92.12	NaN	-0.19
NaN	NaN	NaN	NaN	NaN	NaN	71.35	NaN	-0.36	NaN	NaN	NaN	NaN	NaN	NaN	NaN	NaN	NaN	92.22	NaN	-0.17
NaN	NaN	NaN	NaN	NaN	NaN	71.35	NaN	-0.6	NaN	NaN	NaN	NaN	NaN	NaN	NaN	NaN	NaN	92.32	NaN	-0.06
NaN	NaN	NaN	NaN	NaN	NaN	71.45	NaN	-0.33	NaN	NaN	NaN	NaN	NaN	NaN	NaN	NaN	NaN	92.42	NaN	-0.19
NaN	NaN	NaN	NaN	NaN	NaN	71.45	NaN	-0.39	NaN	NaN	NaN	NaN	NaN	NaN	NaN	NaN	NaN	92.52	NaN	-0.26
NaN	NaN	NaN	NaN	NaN	NaN	71.55	NaN	-0.51	NaN	NaN	NaN	NaN	NaN	NaN	NaN	NaN	NaN	92.62	NaN	-0.27
NaN	NaN	NaN	NaN	NaN	NaN	71.55	NaN	-0.63	NaN	NaN	NaN	NaN	NaN	NaN	NaN	NaN	NaN	92.72	NaN	-0.33
NaN	NaN	NaN	NaN	NaN	NaN	71.65	NaN	-0.46	NaN	NaN	NaN	NaN	NaN	NaN	NaN	NaN	NaN	92.82	NaN	-0.5
NaN	NaN	NaN	NaN	NaN	NaN	71.75	NaN	-0.45	NaN	NaN	NaN	NaN	NaN	NaN	NaN	NaN	NaN	92.92	NaN	-0.39
NaN	NaN	NaN	NaN	NaN	NaN	71.85	NaN	-0.48	NaN	NaN	NaN	NaN	NaN	NaN	NaN	NaN	NaN	93.02	NaN	-0.47
NaN	NaN	NaN	NaN	NaN	NaN	71.95	NaN	-0.63	NaN	NaN	NaN	NaN	NaN	NaN	NaN	NaN	NaN	93.12	NaN	-0.28
NaN	NaN	NaN	NaN	NaN	NaN	72.05	NaN	-0.51	NaN	NaN	NaN	NaN	NaN	NaN	NaN	NaN	NaN	93.22	NaN	-0.17
NaN	NaN	NaN	NaN	NaN	NaN	72.05	NaN	-0.53	NaN	NaN	NaN	NaN	NaN	NaN	NaN	NaN	NaN	93.32	NaN	0.07
NaN	NaN	NaN	NaN	NaN	NaN	72.14	NaN	-0.49	NaN	NaN	NaN	NaN	NaN	NaN	NaN	NaN	NaN	93.42	NaN	-0.11
NaN	NaN	NaN	NaN	NaN	NaN	72.25	NaN	-0.63	NaN	NaN	NaN	NaN	NaN	NaN	NaN	NaN	NaN	93.52	NaN	-0.41
NaN	NaN	NaN	NaN	NaN	NaN	72.25	NaN	-0.41	NaN	NaN	NaN	NaN	NaN	NaN	NaN	NaN	NaN	93.62	NaN	-0.08
NaN	NaN	NaN	NaN	NaN	NaN	72.35	NaN	-0.39	NaN	NaN	NaN	NaN	NaN	NaN	NaN	NaN	NaN	93.72	NaN	0.01
NaN	NaN	NaN	NaN	NaN	NaN	72.35	NaN	-0.41	NaN	NaN	NaN	NaN	NaN	NaN	NaN	NaN	NaN	93.82	NaN	0.03
NaN	NaN	NaN	NaN	NaN	NaN	72.45	NaN	-0.2	NaN	NaN	NaN	NaN	NaN	NaN	NaN	NaN	NaN	93.92	NaN	0.06
NaN	NaN	NaN	NaN	NaN	NaN	72.45	NaN	-0.33	NaN	NaN	NaN	NaN	NaN	NaN	NaN	NaN	NaN	94.02	NaN	0.15
NaN	NaN	NaN	NaN	NaN	NaN	72.55	NaN	0.12	NaN	NaN	NaN	NaN	NaN	NaN	NaN	NaN	NaN	94.12	NaN	-0.14
NaN	NaN	NaN	NaN	NaN	NaN	72.55	NaN	-0.19	NaN	NaN	NaN	NaN	NaN	NaN	NaN	NaN	NaN	94.22	NaN	-0.15
NaN	NaN	NaN	NaN	NaN	NaN	72.65	NaN	-0.39	NaN	NaN	NaN	NaN	NaN	NaN	NaN	NaN	NaN	94.32	NaN	-0.07
NaN	NaN	NaN	NaN	NaN	NaN	72.75	NaN	-0.25	NaN	NaN	NaN	NaN	NaN	NaN	NaN	NaN	NaN	94.42	NaN	-0.35
NaN	NaN	NaN	NaN	NaN	NaN	72.85	NaN	-0.03	NaN	NaN	NaN	NaN	NaN	NaN	NaN	NaN	NaN	94.52	NaN	-0.44
NaN	NaN	NaN	NaN	NaN	NaN	73.15	NaN	0.11	NaN	NaN	NaN	NaN	NaN	NaN	NaN	NaN	NaN	94.62	NaN	-0.39
NaN	NaN	NaN	NaN	NaN	NaN	73.25	NaN	-0.21	NaN	NaN	NaN	NaN	NaN	NaN	NaN	NaN	NaN	94.72	NaN	-0.05
NaN	NaN	NaN	NaN	NaN	NaN	73.25	NaN	-0.09	NaN	NaN	NaN	NaN	NaN	NaN	NaN	NaN	NaN	94.82	NaN	-0.23
NaN	NaN	NaN	NaN	NaN	NaN	73.35	NaN	-0.42	NaN	NaN	NaN	NaN	NaN	NaN	NaN	NaN	NaN	94.92	NaN	-0.26
NaN	NaN	NaN	NaN	NaN	NaN	73.45	NaN	-0.39	NaN	NaN	NaN	NaN	NaN	NaN	NaN	NaN	NaN	95.02	NaN	-0.16
NaN	NaN	NaN	NaN	NaN	NaN	73.55	NaN	-0.44	NaN	NaN	NaN	NaN	NaN	NaN	NaN	NaN	NaN	95.12	NaN	-0.12
NaN	NaN	NaN	NaN	NaN	NaN	73.55	NaN	-0.74	NaN	NaN	NaN	NaN	NaN	NaN	NaN	NaN	NaN	95.22	NaN	-0.1
NaN	NaN	NaN	NaN	NaN	NaN	73.65	NaN	-0.5	NaN	NaN	NaN	NaN	NaN	NaN	NaN	NaN	NaN	95.32	NaN	-0.52
NaN	NaN	NaN	NaN	NaN	NaN	73.75	NaN	-0.39	NaN	NaN	NaN	NaN	NaN	NaN	NaN	NaN	NaN	95.52	NaN	0
NaN	NaN	NaN	NaN	NaN	NaN	73.85	NaN	-0.24	NaN	NaN	NaN	NaN	NaN	NaN	NaN	NaN	NaN	95.62	NaN	0.09
NaN	NaN	NaN	NaN	NaN	NaN	73.85	NaN	-0.15	NaN	NaN	NaN	NaN	NaN	NaN	NaN	NaN	NaN	95.72	NaN	0.14
NaN	NaN	NaN	NaN	NaN	NaN	73.95	NaN	-0.43	NaN	NaN	NaN	NaN	NaN	NaN	NaN	NaN	NaN	95.82	NaN	0.63
NaN	NaN	NaN	NaN	NaN	NaN	73.95	NaN	-0.41	NaN	NaN	NaN	NaN	NaN	NaN	NaN	NaN	NaN	95.92	NaN	0.08
NaN	NaN	NaN	NaN	NaN	NaN	74.05	NaN	-0.55	NaN	NaN	NaN	NaN	NaN	NaN	NaN	NaN	NaN	96.02	NaN	0.12
NaN	NaN	NaN	NaN	NaN	NaN	74.05	NaN	-0.32	NaN	NaN	NaN	NaN	NaN	NaN	NaN	NaN	NaN	96.12	NaN	0.06
NaN	NaN	NaN	NaN	NaN	NaN	74.15	NaN	-0.37	NaN	NaN	NaN	NaN	NaN	NaN	NaN	NaN	NaN	96.22	NaN	-0.03
NaN	NaN	NaN	NaN	NaN	NaN	74.15	NaN	-0.22	NaN	NaN	NaN	NaN	NaN	NaN	NaN	NaN	NaN	96.32	NaN	-0.07
NaN	NaN	NaN	NaN	NaN	NaN	74.25	NaN	-0.24	NaN	NaN	NaN	NaN	NaN	NaN	NaN	NaN	NaN	96.42	NaN	0
NaN	NaN	NaN	NaN	NaN	NaN	74.25	NaN	-0.33	NaN	NaN	NaN	NaN	NaN	NaN	NaN	NaN	NaN	96.52	NaN	-0.1
NaN	NaN	NaN	NaN	NaN	NaN	74.3	NaN	-0.24	NaN	NaN	NaN	NaN	NaN	NaN	NaN	NaN	NaN	96.62	NaN	0
NaN	NaN	NaN	NaN	NaN	NaN	74.35	NaN	-0.26	NaN	NaN	NaN	NaN	NaN	NaN	NaN	NaN	NaN	96.72	NaN	-0.06
NaN	NaN	NaN	NaN	NaN	NaN	74.35	NaN	-0.18	NaN	NaN	NaN	NaN	NaN	NaN	NaN	NaN	NaN	96.82	NaN	-0.08
NaN	NaN	NaN	NaN	NaN	NaN	74.36	NaN	-0.25	NaN	NaN	NaN	NaN	NaN	NaN	NaN	NaN	NaN	96.92	NaN	0
NaN	NaN	NaN	NaN	NaN	NaN	74.45	NaN	-0.25	NaN	NaN	NaN	NaN	NaN	NaN	NaN	NaN	NaN	97.02	NaN	-0.01
NaN	NaN	NaN	NaN	NaN	NaN	74.45	NaN	-0.25	NaN	NaN	NaN	NaN	NaN	NaN	NaN	NaN	NaN	97.12	NaN	-0.15
NaN	NaN	NaN	NaN	NaN	NaN	74.45	NaN	-0.25	NaN	NaN	NaN	NaN	NaN	NaN	NaN	NaN	NaN	97.22	NaN	-0.2
NaN	NaN	NaN	NaN	NaN	NaN	74.55	NaN	-0.25	NaN	NaN	NaN	NaN	NaN	NaN	NaN	NaN	NaN	97.32	NaN	-0.3
NaN	NaN	NaN	NaN	NaN	NaN	74.55	NaN	-0.19	NaN	NaN	NaN	NaN	NaN	NaN	NaN	NaN	NaN	97.42	NaN	-0.44
NaN	NaN	NaN	NaN	NaN	NaN	74.62	NaN	-0.2	NaN	NaN	NaN	NaN	NaN	NaN	NaN	NaN	NaN	97.52	NaN	-0.44
NaN	NaN	NaN	NaN	NaN	NaN	74.65	NaN	-0.22	NaN	NaN	NaN	NaN	NaN	NaN	NaN	NaN	NaN	97.62	NaN	-0.41
NaN	NaN	NaN	NaN	NaN	NaN	74.65	NaN	-0.27	NaN	NaN	NaN	NaN	NaN	NaN	NaN	NaN	NaN	97.72	NaN	-0.48
NaN	NaN	NaN	NaN	NaN	NaN	74.75	NaN	0.05	NaN	NaN	NaN	NaN	NaN	NaN	NaN	NaN	NaN	97.82	NaN	-0.54
NaN	NaN	NaN	NaN	NaN	NaN	74.75	NaN	-0.06	NaN	NaN	NaN	NaN	NaN	NaN	NaN	NaN	NaN	97.92	NaN	-0.54
NaN	NaN	NaN	NaN	NaN	NaN	74.81	NaN	-0.39	NaN	NaN	NaN	NaN	NaN	NaN	NaN	NaN	NaN	98.02	NaN	-0.47
NaN	NaN	NaN	NaN	NaN	NaN	74.85	NaN	0.23	NaN	NaN	NaN	NaN	NaN	NaN	NaN	NaN	NaN	98.12	NaN	-0.51
NaN	NaN	NaN	NaN	NaN	NaN	74.85	NaN	0.02	NaN	NaN	NaN	NaN	NaN	NaN	NaN	NaN	NaN	98.3	NaN	-0.51
NaN	NaN	NaN	NaN	NaN	NaN	74.95	NaN	-0.35	NaN	NaN	NaN	NaN	NaN	NaN	NaN	NaN	NaN	98.4	NaN	-0.43
NaN	NaN	NaN	NaN	NaN	NaN	74.95	NaN	-0.12	NaN	NaN	NaN	NaN	NaN	NaN	NaN	NaN	NaN	98.5	NaN	-0.19
NaN	NaN	NaN	NaN	NaN	NaN	74.95	NaN	-0.19	NaN	NaN	NaN	NaN	NaN	NaN	NaN	NaN	NaN	98.6	NaN	-0.09
NaN	NaN	NaN	NaN	NaN	NaN	74.95	NaN	-0.03	NaN	NaN	NaN	NaN	NaN	NaN	NaN	NaN	NaN	98.7	NaN	-0.39
NaN	NaN	NaN	NaN	NaN	NaN	75.01	NaN	-0.12	NaN	NaN	NaN	NaN	NaN	NaN	NaN	NaN	NaN	98.8	NaN	-0.21
NaN	NaN	NaN	NaN	NaN	NaN	75.05	NaN	0.08	NaN	NaN	NaN	NaN	NaN	NaN	NaN	NaN	NaN	98.9	NaN	-0.61
NaN	NaN	NaN	NaN	NaN	NaN	75.15	NaN	0.08	NaN	NaN	NaN	NaN	NaN	NaN	NaN	NaN	NaN	99	NaN	-0.3
NaN	NaN	NaN	NaN	NaN	NaN	75.25	NaN	-0.01	NaN	NaN	NaN	NaN	NaN	NaN	NaN	NaN	NaN	99.1	NaN	-0.26
NaN	NaN	NaN	NaN	NaN	NaN	75.25	NaN	-0.41	NaN	NaN	NaN	NaN	NaN	NaN	NaN	NaN	NaN	99.2	NaN	-0.14
NaN	NaN	NaN	NaN	NaN	NaN	75.34	NaN	-0.14	NaN	NaN	NaN	NaN	NaN	NaN	NaN	NaN	NaN	99.3	NaN	-0.32
NaN	NaN	NaN	NaN	NaN	NaN	75.35	NaN	-0.29	NaN	NaN	NaN	NaN	NaN	NaN	NaN	NaN	NaN	99.4	NaN	-0.36
NaN	NaN	NaN	NaN	NaN	NaN	75.39	NaN	-0.23	NaN	NaN	NaN	NaN	NaN	NaN	NaN	NaN	NaN	99.5	NaN	-0.32
NaN	NaN	NaN	NaN	NaN	NaN	75.44	NaN	-1.24	NaN	NaN	NaN	NaN	NaN	NaN	NaN	NaN	NaN	99.6	NaN	-0.18
NaN	NaN	NaN	NaN	NaN	NaN	75.45	NaN	-0.15	NaN	NaN	NaN	NaN	NaN	NaN	NaN	NaN	NaN	99.7	NaN	-0.33
NaN	NaN	NaN	NaN	NaN	NaN	75.52	NaN	-0.09	NaN	NaN	NaN	NaN	NaN	NaN	NaN	NaN	NaN	99.8	NaN	-0.28
NaN	NaN	NaN	NaN	NaN	NaN	75.55	NaN	-0.11	NaN	NaN	NaN	NaN	NaN	NaN	NaN	NaN	NaN	99.9	NaN	-0.32
NaN	NaN	NaN	NaN	NaN	NaN	75.55	NaN	-0.03	NaN	NaN	NaN	NaN	NaN	NaN	NaN	NaN	NaN	100	NaN	-0.37
NaN	NaN	NaN	NaN	NaN	NaN	75.56	NaN	-0.14	NaN	NaN	NaN	NaN	NaN	NaN	NaN	NaN	NaN	100.1	NaN	-0.16
NaN	NaN	NaN	NaN	NaN	NaN	75.62	NaN	-0.17	NaN	NaN	NaN	NaN	NaN	NaN	NaN	NaN	NaN	100.2	NaN	-0.42
NaN	NaN	NaN	NaN	NaN	NaN	75.62	NaN	-0.07	NaN	NaN	NaN	NaN	NaN	NaN	NaN	NaN	NaN	100.3	NaN	-0.08
NaN	NaN	NaN	NaN	NaN	NaN	75.65	NaN	0.14	NaN	NaN	NaN	NaN	NaN	NaN	NaN	NaN	NaN	100.4	NaN	0.12
NaN	NaN	NaN	NaN	NaN	NaN	75.65	NaN	-0.02	NaN	NaN	NaN	NaN	NaN	NaN	NaN	NaN	NaN	100.5	NaN	-0.09
NaN	NaN	NaN	NaN	NaN	NaN	75.7	NaN	-0.31	NaN	NaN	NaN	NaN	NaN	NaN	NaN	NaN	NaN	100.6	NaN	0
NaN	NaN	NaN	NaN	NaN	NaN	75.75	NaN	-0.02	NaN	NaN	NaN	NaN	NaN	NaN	NaN	NaN	NaN	100.7	NaN	-0.17
NaN	NaN	NaN	NaN	NaN	NaN	75.82	NaN	-0.3	NaN	NaN	NaN	NaN	NaN	NaN	NaN	NaN	NaN	100.8	NaN	-0.25
NaN	NaN	NaN	NaN	NaN	NaN	75.85	NaN	0.12	NaN	NaN	NaN	NaN	NaN	NaN	NaN	NaN	NaN	100.9	NaN	-0.27
NaN	NaN	NaN	NaN	NaN	NaN	75.85	NaN	-0.42	NaN	NaN	NaN	NaN	NaN	NaN	NaN	NaN	NaN	101	NaN	-0.61
NaN	NaN	NaN	NaN	NaN	NaN	75.85	NaN	-0.7	NaN	NaN	NaN	NaN	NaN	NaN	NaN	NaN	NaN	101.1	NaN	-0.38
NaN	NaN	NaN	NaN	NaN	NaN	75.95	NaN	-0.17	NaN	NaN	NaN	NaN	NaN	NaN	NaN	NaN	NaN	101.2	NaN	-0.49
NaN	NaN	NaN	NaN	NaN	NaN	75.95	NaN	0	NaN	NaN	NaN	NaN	NaN	NaN	NaN	NaN	NaN	101.3	NaN	-0.52
NaN	NaN	NaN	NaN	NaN	NaN	75.98	NaN	-0.36	NaN	NaN	NaN	NaN	NaN	NaN	NaN	NaN	NaN	101.4	NaN	-0.64
NaN	NaN	NaN	NaN	NaN	NaN	76.05	NaN	-0.22	NaN	NaN	NaN	NaN	NaN	NaN	NaN	NaN	NaN	101.5	NaN	-0.6
NaN	NaN	NaN	NaN	NaN	NaN	76.05	NaN	-0.23	NaN	NaN	NaN	NaN	NaN	NaN	NaN	NaN	NaN	101.6	NaN	-0.24
NaN	NaN	NaN	NaN	NaN	NaN	76.15	NaN	0	NaN	NaN	NaN	NaN	NaN	NaN	NaN	NaN	NaN	101.7	NaN	-0.72
NaN	NaN	NaN	NaN	NaN	NaN	76.15	NaN	-0.05	NaN	NaN	NaN	NaN	NaN	NaN	NaN	NaN	NaN	101.8	NaN	-0.24
NaN	NaN	NaN	NaN	NaN	NaN	76.22	NaN	-0.31	NaN	NaN	NaN	NaN	NaN	NaN	NaN	NaN	NaN	101.9	NaN	-0.59
NaN	NaN	NaN	NaN	NaN	NaN	76.26	NaN	-0.27	NaN	NaN	NaN	NaN	NaN	NaN	NaN	NaN	NaN	102	NaN	-0.45
NaN	NaN	NaN	NaN	NaN	NaN	76.27	NaN	-0.06	NaN	NaN	NaN	NaN	NaN	NaN	NaN	NaN	NaN	102.1	NaN	-0.41
NaN	NaN	NaN	NaN	NaN	NaN	76.27	NaN	-0.09	NaN	NaN	NaN	NaN	NaN	NaN	NaN	NaN	NaN	102.2	NaN	-0.31
NaN	NaN	NaN	NaN	NaN	NaN	76.33	NaN	0	NaN	NaN	NaN	NaN	NaN	NaN	NaN	NaN	NaN	102.3	NaN	-0.4
NaN	NaN	NaN	NaN	NaN	NaN	76.33	NaN	-0.08	NaN	NaN	NaN	NaN	NaN	NaN	NaN	NaN	NaN	102.4	NaN	-0.22
NaN	NaN	NaN	NaN	NaN	NaN	76.36	NaN	-0.19	NaN	NaN	NaN	NaN	NaN	NaN	NaN	NaN	NaN	102.5	NaN	-0.19
NaN	NaN	NaN	NaN	NaN	NaN	76.39	NaN	-0.58	NaN	NaN	NaN	NaN	NaN	NaN	NaN	NaN	NaN	102.6	NaN	-0.07
NaN	NaN	NaN	NaN	NaN	NaN	76.39	NaN	-0.05	NaN	NaN	NaN	NaN	NaN	NaN	NaN	NaN	NaN	102.7	NaN	-0.03
NaN	NaN	NaN	NaN	NaN	NaN	76.44	NaN	0.2	NaN	NaN	NaN	NaN	NaN	NaN	NaN	NaN	NaN	102.8	NaN	-0.16
NaN	NaN	NaN	NaN	NaN	NaN	76.47	NaN	-0.21	NaN	NaN	NaN	NaN	NaN	NaN	NaN	NaN	NaN	102.9	NaN	-0.15
NaN	NaN	NaN	NaN	NaN	NaN	76.54	NaN	-0.29	NaN	NaN	NaN	NaN	NaN	NaN	NaN	NaN	NaN	103	NaN	-0.19
NaN	NaN	NaN	NaN	NaN	NaN	76.63	NaN	-0.39	NaN	NaN	NaN	NaN	NaN	NaN	NaN	NaN	NaN	103.1	NaN	-0.29
NaN	NaN	NaN	NaN	NaN	NaN	76.76	NaN	-0.2	NaN	NaN	NaN	NaN	NaN	NaN	NaN	NaN	NaN	103.2	NaN	-0.24
NaN	NaN	NaN	NaN	NaN	NaN	76.85	NaN	-0.56	NaN	NaN	NaN	NaN	NaN	NaN	NaN	NaN	NaN	103.3	NaN	-0.07
NaN	NaN	NaN	NaN	NaN	NaN	76.95	NaN	-0.37	NaN	NaN	NaN	NaN	NaN	NaN	NaN	NaN	NaN	103.4	NaN	-0.24
NaN	NaN	NaN	NaN	NaN	NaN	77.06	NaN	-0.58	NaN	NaN	NaN	NaN	NaN	NaN	NaN	NaN	NaN	103.5	NaN	-0.18
NaN	NaN	NaN	NaN	NaN	NaN	77.17	NaN	-0.63	NaN	NaN	NaN	NaN	NaN	NaN	NaN	NaN	NaN	103.6	NaN	-0.39
NaN	NaN	NaN	NaN	NaN	NaN	77.27	NaN	-0.31	NaN	NaN	NaN	NaN	NaN	NaN	NaN	NaN	NaN	103.7	NaN	-0.31
NaN	NaN	NaN	NaN	NaN	NaN	77.35	NaN	-0.86	NaN	NaN	NaN	NaN	NaN	NaN	NaN	NaN	NaN	103.9	NaN	-0.36
NaN	NaN	NaN	NaN	NaN	NaN	77.55	NaN	-0.65	NaN	NaN	NaN	NaN	NaN	NaN	NaN	NaN	NaN	104	NaN	-0.39
NaN	NaN	NaN	NaN	NaN	NaN	77.55	NaN	-0.81	NaN	NaN	NaN	NaN	NaN	NaN	NaN	NaN	NaN	104.1	NaN	-0.45
NaN	NaN	NaN	NaN	NaN	NaN	77.65	NaN	-0.44	NaN	NaN	NaN	NaN	NaN	NaN	NaN	NaN	NaN	104.2	NaN	-0.32
NaN	NaN	NaN	NaN	NaN	NaN	77.65	NaN	-0.5	NaN	NaN	NaN	NaN	NaN	NaN	NaN	NaN	NaN	104.3	NaN	-0.35
NaN	NaN	NaN	NaN	NaN	NaN	77.75	NaN	-0.85	NaN	NaN	NaN	NaN	NaN	NaN	NaN	NaN	NaN	104.4	NaN	-0.23
NaN	NaN	NaN	NaN	NaN	NaN	77.75	NaN	-0.52	NaN	NaN	NaN	NaN	NaN	NaN	NaN	NaN	NaN	104.5	NaN	-0.19
NaN	NaN	NaN	NaN	NaN	NaN	77.85	NaN	-0.56	NaN	NaN	NaN	NaN	NaN	NaN	NaN	NaN	NaN	104.6	NaN	-0.28
NaN	NaN	NaN	NaN	NaN	NaN	77.97	NaN	-0.76	NaN	NaN	NaN	NaN	NaN	NaN	NaN	NaN	NaN	104.7	NaN	-0.33
NaN	NaN	NaN	NaN	NaN	NaN	78.06	NaN	-0.73	NaN	NaN	NaN	NaN	NaN	NaN	NaN	NaN	NaN	104.8	NaN	-0.41
NaN	NaN	NaN	NaN	NaN	NaN	78.15	NaN	-0.79	NaN	NaN	NaN	NaN	NaN	NaN	NaN	NaN	NaN	104.9	NaN	-0.35
NaN	NaN	NaN	NaN	NaN	NaN	78.26	NaN	-0.65	NaN	NaN	NaN	NaN	NaN	NaN	NaN	NaN	NaN	105.08	NaN	-0.27
NaN	NaN	NaN	NaN	NaN	NaN	78.36	NaN	-0.55	NaN	NaN	NaN	NaN	NaN	NaN	NaN	NaN	NaN	105.18	NaN	-0.16
NaN	NaN	NaN	NaN	NaN	NaN	78.36	NaN	-0.75	NaN	NaN	NaN	NaN	NaN	NaN	NaN	NaN	NaN	105.28	NaN	-0.17
NaN	NaN	NaN	NaN	NaN	NaN	78.45	NaN	-0.73	NaN	NaN	NaN	NaN	NaN	NaN	NaN	NaN	NaN	105.38	NaN	-0.04
NaN	NaN	NaN	NaN	NaN	NaN	78.55	NaN	-0.81	NaN	NaN	NaN	NaN	NaN	NaN	NaN	NaN	NaN	105.48	NaN	-0.23
NaN	NaN	NaN	NaN	NaN	NaN	78.55	NaN	-0.84	NaN	NaN	NaN	NaN	NaN	NaN	NaN	NaN	NaN	105.68	NaN	0.02
NaN	NaN	NaN	NaN	NaN	NaN	78.55	NaN	-0.81	NaN	NaN	NaN	NaN	NaN	NaN	NaN	NaN	NaN	105.78	NaN	-0.1
NaN	NaN	NaN	NaN	NaN	NaN	78.63	NaN	-0.61	NaN	NaN	NaN	NaN	NaN	NaN	NaN	NaN	NaN	105.88	NaN	-0.09
NaN	NaN	NaN	NaN	NaN	NaN	78.71	NaN	-0.65	NaN	NaN	NaN	NaN	NaN	NaN	NaN	NaN	NaN	106.48	NaN	-0.3
NaN	NaN	NaN	NaN	NaN	NaN	78.72	NaN	-0.4	NaN	NaN	NaN	NaN	NaN	NaN	NaN	NaN	NaN	106.58	NaN	-0.43
NaN	NaN	NaN	NaN	NaN	NaN	78.78	NaN	-0.66	NaN	NaN	NaN	NaN	NaN	NaN	NaN	NaN	NaN	106.68	NaN	-0.32
NaN	NaN	NaN	NaN	NaN	NaN	78.8	NaN	-0.49	NaN	NaN	NaN	NaN	NaN	NaN	NaN	NaN	NaN	106.78	NaN	-0.25
NaN	NaN	NaN	NaN	NaN	NaN	78.8	NaN	-0.78	NaN	NaN	NaN	NaN	NaN	NaN	NaN	NaN	NaN	106.88	NaN	-0.09
NaN	NaN	NaN	NaN	NaN	NaN	78.88	NaN	-0.58	NaN	NaN	NaN	NaN	NaN	NaN	NaN	NaN	NaN	106.98	NaN	-0.12
NaN	NaN	NaN	NaN	NaN	NaN	78.89	NaN	-0.57	NaN	NaN	NaN	NaN	NaN	NaN	NaN	NaN	NaN	107.08	NaN	0.09
NaN	NaN	NaN	NaN	NaN	NaN	78.98	NaN	-0.47	NaN	NaN	NaN	NaN	NaN	NaN	NaN	NaN	NaN	107.18	NaN	-0.27
NaN	NaN	NaN	NaN	NaN	NaN	78.99	NaN	-0.49	NaN	NaN	NaN	NaN	NaN	NaN	NaN	NaN	NaN	107.28	NaN	-0.12
NaN	NaN	NaN	NaN	NaN	NaN	79.06	NaN	-0.54	NaN	NaN	NaN	NaN	NaN	NaN	NaN	NaN	NaN	107.38	NaN	0.02
NaN	NaN	NaN	NaN	NaN	NaN	79.11	NaN	-0.7	NaN	NaN	NaN	NaN	NaN	NaN	NaN	NaN	NaN	107.48	NaN	-0.16
NaN	NaN	NaN	NaN	NaN	NaN	79.11	NaN	-0.78	NaN	NaN	NaN	NaN	NaN	NaN	NaN	NaN	NaN	107.58	NaN	-0.22
NaN	NaN	NaN	NaN	NaN	NaN	79.11	NaN	-1.32	NaN	NaN	NaN	NaN	NaN	NaN	NaN	NaN	NaN	107.68	NaN	-0.32
NaN	NaN	NaN	NaN	NaN	NaN	79.19	NaN	-0.54	NaN	NaN	NaN	NaN	NaN	NaN	NaN	NaN	NaN	107.78	NaN	-0.39
NaN	NaN	NaN	NaN	NaN	NaN	79.25	NaN	-0.63	NaN	NaN	NaN	NaN	NaN	NaN	NaN	NaN	NaN	107.88	NaN	-0.23
NaN	NaN	NaN	NaN	NaN	NaN	79.35	NaN	-0.57	NaN	NaN	NaN	NaN	NaN	NaN	NaN	NaN	NaN	107.98	NaN	-0.52
NaN	NaN	NaN	NaN	NaN	NaN	79.45	NaN	-0.56	NaN	NaN	NaN	NaN	NaN	NaN	NaN	NaN	NaN	108.08	NaN	-0.2
NaN	NaN	NaN	NaN	NaN	NaN	79.52	NaN	-0.64	NaN	NaN	NaN	NaN	NaN	NaN	NaN	NaN	NaN	108.18	NaN	-0.34
NaN	NaN	NaN	NaN	NaN	NaN	79.63	NaN	-0.83	NaN	NaN	NaN	NaN	NaN	NaN	NaN	NaN	NaN	108.28	NaN	-0.25
NaN	NaN	NaN	NaN	NaN	NaN	79.63	NaN	-0.65	NaN	NaN	NaN	NaN	NaN	NaN	NaN	NaN	NaN	108.38	NaN	-0.42
NaN	NaN	NaN	NaN	NaN	NaN	79.69	NaN	-0.64	NaN	NaN	NaN	NaN	NaN	NaN	NaN	NaN	NaN	108.48	NaN	-0.15
NaN	NaN	NaN	NaN	NaN	NaN	79.74	NaN	-0.36	NaN	NaN	NaN	NaN	NaN	NaN	NaN	NaN	NaN	108.58	NaN	-0.4
NaN	NaN	NaN	NaN	NaN	NaN	79.8	NaN	-0.59	NaN	NaN	NaN	NaN	NaN	NaN	NaN	NaN	NaN	108.68	NaN	-0.09
NaN	NaN	NaN	NaN	NaN	NaN	79.8	NaN	-0.32	NaN	NaN	NaN	NaN	NaN	NaN	NaN	NaN	NaN	108.88	NaN	-0.03
NaN	NaN	NaN	NaN	NaN	NaN	79.86	NaN	-0.55	NaN	NaN	NaN	NaN	NaN	NaN	NaN	NaN	NaN	108.98	NaN	0.27
NaN	NaN	NaN	NaN	NaN	NaN	79.86	NaN	-0.27	NaN	NaN	NaN	NaN	NaN	NaN	NaN	NaN	NaN	109.04	NaN	0.05
NaN	NaN	NaN	NaN	NaN	NaN	79.94	NaN	-0.36	NaN	NaN	NaN	NaN	NaN	NaN	NaN	NaN	NaN	109.18	NaN	0.07
NaN	NaN	NaN	NaN	NaN	NaN	79.94	NaN	0.61	NaN	NaN	NaN	NaN	NaN	NaN	NaN	NaN	NaN	109.28	NaN	-0.48
NaN	NaN	NaN	NaN	NaN	NaN	80.03	NaN	-0.56	NaN	NaN	NaN	NaN	NaN	NaN	NaN	NaN	NaN	109.38	NaN	-0.29
NaN	NaN	NaN	NaN	NaN	NaN	80.13	NaN	-0.53	NaN	NaN	NaN	NaN	NaN	NaN	NaN	NaN	NaN	109.48	NaN	0.1
NaN	NaN	NaN	NaN	NaN	NaN	80.24	NaN	-0.44	NaN	NaN	NaN	NaN	NaN	NaN	NaN	NaN	NaN	109.58	NaN	-0.25
NaN	NaN	NaN	NaN	NaN	NaN	80.24	NaN	-0.66	NaN	NaN	NaN	NaN	NaN	NaN	NaN	NaN	NaN	109.7	NaN	-0.31
NaN	NaN	NaN	NaN	NaN	NaN	80.24	NaN	-0.71	NaN	NaN	NaN	NaN	NaN	NaN	NaN	NaN	NaN	109.78	NaN	-0.34
NaN	NaN	NaN	NaN	NaN	NaN	80.24	NaN	-0.64	NaN	NaN	NaN	NaN	NaN	NaN	NaN	NaN	NaN	109.88	NaN	-0.32
NaN	NaN	NaN	NaN	NaN	NaN	80.35	NaN	-0.8	NaN	NaN	NaN	NaN	NaN	NaN	NaN	NaN	NaN	109.98	NaN	-0.2
NaN	NaN	NaN	NaN	NaN	NaN	80.35	NaN	-0.53	NaN	NaN	NaN	NaN	NaN	NaN	NaN	NaN	NaN	110.08	NaN	-0.17
NaN	NaN	NaN	NaN	NaN	NaN	80.45	NaN	-0.55	NaN	NaN	NaN	NaN	NaN	NaN	NaN	NaN	NaN	110.18	NaN	-0.05
NaN	NaN	NaN	NaN	NaN	NaN	80.45	NaN	-0.52	NaN	NaN	NaN	NaN	NaN	NaN	NaN	NaN	NaN	110.38	NaN	-0.08
NaN	NaN	NaN	NaN	NaN	NaN	80.55	NaN	-0.5	NaN	NaN	NaN	NaN	NaN	NaN	NaN	NaN	NaN	110.44	NaN	0.16
NaN	NaN	NaN	NaN	NaN	NaN	80.55	NaN	-0.3	NaN	NaN	NaN	NaN	NaN	NaN	NaN	NaN	NaN	110.48	NaN	-0.1
NaN	NaN	NaN	NaN	NaN	NaN	80.65	NaN	-0.52	NaN	NaN	NaN	NaN	NaN	NaN	NaN	NaN	NaN	110.54	NaN	-0.1
NaN	NaN	NaN	NaN	NaN	NaN	80.65	NaN	-0.47	NaN	NaN	NaN	NaN	NaN	NaN	NaN	NaN	NaN	110.58	NaN	-0.04
NaN	NaN	NaN	NaN	NaN	NaN	80.75	NaN	-0.3	NaN	NaN	NaN	NaN	NaN	NaN	NaN	NaN	NaN	110.64	NaN	-0.07
NaN	NaN	NaN	NaN	NaN	NaN	80.75	NaN	-0.48	NaN	NaN	NaN	NaN	NaN	NaN	NaN	NaN	NaN	110.68	NaN	-0.07
NaN	NaN	NaN	NaN	NaN	NaN	80.85	NaN	-0.87	NaN	NaN	NaN	NaN	NaN	NaN	NaN	NaN	NaN	110.74	NaN	0.4
NaN	NaN	NaN	NaN	NaN	NaN	80.85	NaN	-0.86	NaN	NaN	NaN	NaN	NaN	NaN	NaN	NaN	NaN	110.78	NaN	-0.11
NaN	NaN	NaN	NaN	NaN	NaN	80.95	NaN	-0.6	NaN	NaN	NaN	NaN	NaN	NaN	NaN	NaN	NaN	110.88	NaN	-0.09
NaN	NaN	NaN	NaN	NaN	NaN	80.95	NaN	-0.75	NaN	NaN	NaN	NaN	NaN	NaN	NaN	NaN	NaN	110.98	NaN	-0.24
NaN	NaN	NaN	NaN	NaN	NaN	81.05	NaN	-0.94	NaN	NaN	NaN	NaN	NaN	NaN	NaN	NaN	NaN	111.04	NaN	-0.02
NaN	NaN	NaN	NaN	NaN	NaN	81.05	NaN	-0.92	NaN	NaN	NaN	NaN	NaN	NaN	NaN	NaN	NaN	111.08	NaN	-0.04
NaN	NaN	NaN	NaN	NaN	NaN	81.16	NaN	-0.79	NaN	NaN	NaN	NaN	NaN	NaN	NaN	NaN	NaN	111.14	NaN	-0.27
NaN	NaN	NaN	NaN	NaN	NaN	81.16	NaN	-1.04	NaN	NaN	NaN	NaN	NaN	NaN	NaN	NaN	NaN	111.24	NaN	-0.3
NaN	NaN	NaN	NaN	NaN	NaN	81.25	NaN	-0.94	NaN	NaN	NaN	NaN	NaN	NaN	NaN	NaN	NaN	111.28	NaN	0.03
NaN	NaN	NaN	NaN	NaN	NaN	81.25	NaN	-0.91	NaN	NaN	NaN	NaN	NaN	NaN	NaN	NaN	NaN	111.34	NaN	-0.09
NaN	NaN	NaN	NaN	NaN	NaN	81.35	NaN	-1.04	NaN	NaN	NaN	NaN	NaN	NaN	NaN	NaN	NaN	111.38	NaN	0.07
NaN	NaN	NaN	NaN	NaN	NaN	81.35	NaN	-0.97	NaN	NaN	NaN	NaN	NaN	NaN	NaN	NaN	NaN	111.44	NaN	-0.12
NaN	NaN	NaN	NaN	NaN	NaN	81.45	NaN	-0.8	NaN	NaN	NaN	NaN	NaN	NaN	NaN	NaN	NaN	111.54	NaN	-0.01
NaN	NaN	NaN	NaN	NaN	NaN	81.45	NaN	-0.89	NaN	NaN	NaN	NaN	NaN	NaN	NaN	NaN	NaN	111.64	NaN	0.04
NaN	NaN	NaN	NaN	NaN	NaN	81.55	NaN	-0.8	NaN	NaN	NaN	NaN	NaN	NaN	NaN	NaN	NaN	111.74	NaN	0.24
NaN	NaN	NaN	NaN	NaN	NaN	81.55	NaN	-0.96	NaN	NaN	NaN	NaN	NaN	NaN	NaN	NaN	NaN	111.88	NaN	-0.2
NaN	NaN	NaN	NaN	NaN	NaN	81.65	NaN	-0.89	NaN	NaN	NaN	NaN	NaN	NaN	NaN	NaN	NaN	111.94	NaN	0.1
NaN	NaN	NaN	NaN	NaN	NaN	81.65	NaN	-0.73	NaN	NaN	NaN	NaN	NaN	NaN	NaN	NaN	NaN	111.98	NaN	0.02
NaN	NaN	NaN	NaN	NaN	NaN	81.75	NaN	-0.91	NaN	NaN	NaN	NaN	NaN	NaN	NaN	NaN	NaN	112.04	NaN	0.13
NaN	NaN	NaN	NaN	NaN	NaN	81.75	NaN	-0.9	NaN	NaN	NaN	NaN	NaN	NaN	NaN	NaN	NaN	112.18	NaN	-0.73
NaN	NaN	NaN	NaN	NaN	NaN	81.85	NaN	-0.7	NaN	NaN	NaN	NaN	NaN	NaN	NaN	NaN	NaN	112.24	NaN	0
NaN	NaN	NaN	NaN	NaN	NaN	81.85	NaN	-0.73	NaN	NaN	NaN	NaN	NaN	NaN	NaN	NaN	NaN	112.28	NaN	-0.17
NaN	NaN	NaN	NaN	NaN	NaN	81.95	NaN	-0.69	NaN	NaN	NaN	NaN	NaN	NaN	NaN	NaN	NaN	112.34	NaN	-0.01
NaN	NaN	NaN	NaN	NaN	NaN	81.95	NaN	-0.87	NaN	NaN	NaN	NaN	NaN	NaN	NaN	NaN	NaN	112.38	NaN	-0.34
NaN	NaN	NaN	NaN	NaN	NaN	82.05	NaN	-0.45	NaN	NaN	NaN	NaN	NaN	NaN	NaN	NaN	NaN	112.48	NaN	-0.43
NaN	NaN	NaN	NaN	NaN	NaN	82.05	NaN	-0.77	NaN	NaN	NaN	NaN	NaN	NaN	NaN	NaN	NaN	112.54	NaN	0.5
NaN	NaN	NaN	NaN	NaN	NaN	82.05	NaN	-0.66	NaN	NaN	NaN	NaN	NaN	NaN	NaN	NaN	NaN	112.58	NaN	-0.23
NaN	NaN	NaN	NaN	NaN	NaN	82.05	NaN	-0.69	NaN	NaN	NaN	NaN	NaN	NaN	NaN	NaN	NaN	112.64	NaN	-0.38
NaN	NaN	NaN	NaN	NaN	NaN	82.15	NaN	-0.52	NaN	NaN	NaN	NaN	NaN	NaN	NaN	NaN	NaN	112.7	NaN	-0.35
NaN	NaN	NaN	NaN	NaN	NaN	82.15	NaN	-0.55	NaN	NaN	NaN	NaN	NaN	NaN	NaN	NaN	NaN	112.78	NaN	-0.34
NaN	NaN	NaN	NaN	NaN	NaN	82.25	NaN	-0.42	NaN	NaN	NaN	NaN	NaN	NaN	NaN	NaN	NaN	112.84	NaN	0.39
NaN	NaN	NaN	NaN	NaN	NaN	82.25	NaN	-0.48	NaN	NaN	NaN	NaN	NaN	NaN	NaN	NaN	NaN	112.88	NaN	-0.2
NaN	NaN	NaN	NaN	NaN	NaN	82.34	NaN	-0.33	NaN	NaN	NaN	NaN	NaN	NaN	NaN	NaN	NaN	112.94	NaN	-0.07
NaN	NaN	NaN	NaN	NaN	NaN	82.34	NaN	-0.28	NaN	NaN	NaN	NaN	NaN	NaN	NaN	NaN	NaN	112.98	NaN	-0.21
NaN	NaN	NaN	NaN	NaN	NaN	82.44	NaN	-0.54	NaN	NaN	NaN	NaN	NaN	NaN	NaN	NaN	NaN	113.04	NaN	-0.04
NaN	NaN	NaN	NaN	NaN	NaN	82.44	NaN	-0.22	NaN	NaN	NaN	NaN	NaN	NaN	NaN	NaN	NaN	113.08	NaN	-0.35
NaN	NaN	NaN	NaN	NaN	NaN	82.54	NaN	-0.31	NaN	NaN	NaN	NaN	NaN	NaN	NaN	NaN	NaN	113.14	NaN	0.08
NaN	NaN	NaN	NaN	NaN	NaN	82.64	NaN	-0.3	NaN	NaN	NaN	NaN	NaN	NaN	NaN	NaN	NaN	113.18	NaN	-0.3
NaN	NaN	NaN	NaN	NaN	NaN	82.64	NaN	-0.09	NaN	NaN	NaN	NaN	NaN	NaN	NaN	NaN	NaN	113.24	NaN	-0.04
NaN	NaN	NaN	NaN	NaN	NaN	82.75	NaN	-0.22	NaN	NaN	NaN	NaN	NaN	NaN	NaN	NaN	NaN	113.28	NaN	-0.24
NaN	NaN	NaN	NaN	NaN	NaN	82.85	NaN	-0.28	NaN	NaN	NaN	NaN	NaN	NaN	NaN	NaN	NaN	113.34	NaN	0.44
NaN	NaN	NaN	NaN	NaN	NaN	82.95	NaN	-0.66	NaN	NaN	NaN	NaN	NaN	NaN	NaN	NaN	NaN	113.44	NaN	-0.07
NaN	NaN	NaN	NaN	NaN	NaN	83.06	NaN	-0.38	NaN	NaN	NaN	NaN	NaN	NaN	NaN	NaN	NaN	113.48	NaN	-0.09
NaN	NaN	NaN	NaN	NaN	NaN	83.15	NaN	-0.41	NaN	NaN	NaN	NaN	NaN	NaN	NaN	NaN	NaN	113.54	NaN	-0.15
NaN	NaN	NaN	NaN	NaN	NaN	83.25	NaN	-0.65	NaN	NaN	NaN	NaN	NaN	NaN	NaN	NaN	NaN	113.58	NaN	-0.05
NaN	NaN	NaN	NaN	NaN	NaN	83.35	NaN	-0.4	NaN	NaN	NaN	NaN	NaN	NaN	NaN	NaN	NaN	113.64	NaN	-0.16
NaN	NaN	NaN	NaN	NaN	NaN	83.45	NaN	-0.84	NaN	NaN	NaN	NaN	NaN	NaN	NaN	NaN	NaN	113.68	NaN	0
NaN	NaN	NaN	NaN	NaN	NaN	83.45	NaN	-0.63	NaN	NaN	NaN	NaN	NaN	NaN	NaN	NaN	NaN	113.84	NaN	-0.1
NaN	NaN	NaN	NaN	NaN	NaN	83.55	NaN	-0.27	NaN	NaN	NaN	NaN	NaN	NaN	NaN	NaN	NaN	113.86	NaN	-0.18
NaN	NaN	NaN	NaN	NaN	NaN	83.65	NaN	-0.51	NaN	NaN	NaN	NaN	NaN	NaN	NaN	NaN	NaN	113.94	NaN	-0.31
NaN	NaN	NaN	NaN	NaN	NaN	83.75	NaN	-0.33	NaN	NaN	NaN	NaN	NaN	NaN	NaN	NaN	NaN	113.96	NaN	-0.07
NaN	NaN	NaN	NaN	NaN	NaN	83.85	NaN	-0.71	NaN	NaN	NaN	NaN	NaN	NaN	NaN	NaN	NaN	114.04	NaN	-0.34
NaN	NaN	NaN	NaN	NaN	NaN	83.85	NaN	-0.42	NaN	NaN	NaN	NaN	NaN	NaN	NaN	NaN	NaN	114.06	NaN	0.4
NaN	NaN	NaN	NaN	NaN	NaN	83.95	NaN	-0.43	NaN	NaN	NaN	NaN	NaN	NaN	NaN	NaN	NaN	114.14	NaN	-0.34
NaN	NaN	NaN	NaN	NaN	NaN	84.06	NaN	-0.35	NaN	NaN	NaN	NaN	NaN	NaN	NaN	NaN	NaN	114.24	NaN	-0.27
NaN	NaN	NaN	NaN	NaN	NaN	84.15	NaN	-0.38	NaN	NaN	NaN	NaN	NaN	NaN	NaN	NaN	NaN	114.34	NaN	-0.45
NaN	NaN	NaN	NaN	NaN	NaN	84.25	NaN	-0.31	NaN	NaN	NaN	NaN	NaN	NaN	NaN	NaN	NaN	114.44	NaN	-0.32
NaN	NaN	NaN	NaN	NaN	NaN	84.35	NaN	-0.45	NaN	NaN	NaN	NaN	NaN	NaN	NaN	NaN	NaN	114.54	NaN	-0.45
NaN	NaN	NaN	NaN	NaN	NaN	84.35	NaN	-0.48	NaN	NaN	NaN	NaN	NaN	NaN	NaN	NaN	NaN	114.64	NaN	-0.56
NaN	NaN	NaN	NaN	NaN	NaN	84.45	NaN	-0.37	NaN	NaN	NaN	NaN	NaN	NaN	NaN	NaN	NaN	114.74	NaN	-0.42
NaN	NaN	NaN	NaN	NaN	NaN	84.55	NaN	-0.37	NaN	NaN	NaN	NaN	NaN	NaN	NaN	NaN	NaN	114.84	NaN	-0.26
NaN	NaN	NaN	NaN	NaN	NaN	84.65	NaN	-0.35	NaN	NaN	NaN	NaN	NaN	NaN	NaN	NaN	NaN	114.94	NaN	-0.34
NaN	NaN	NaN	NaN	NaN	NaN	84.75	NaN	-0.47	NaN	NaN	NaN	NaN	NaN	NaN	NaN	NaN	NaN	115.04	NaN	0.01
NaN	NaN	NaN	NaN	NaN	NaN	84.75	NaN	-0.53	NaN	NaN	NaN	NaN	NaN	NaN	NaN	NaN	NaN	115.24	NaN	-0.05
NaN	NaN	NaN	NaN	NaN	NaN	84.85	NaN	-0.58	NaN	NaN	NaN	NaN	NaN	NaN	NaN	NaN	NaN	115.34	NaN	-0.2
NaN	NaN	NaN	NaN	NaN	NaN	84.85	NaN	-0.65	NaN	NaN	NaN	NaN	NaN	NaN	NaN	NaN	NaN	115.64	NaN	-0.35
NaN	NaN	NaN	NaN	NaN	NaN	84.85	NaN	-0.44	NaN	NaN	NaN	NaN	NaN	NaN	NaN	NaN	NaN	115.74	NaN	-0.57
NaN	NaN	NaN	NaN	NaN	NaN	84.85	NaN	-0.72	NaN	NaN	NaN	NaN	NaN	NaN	NaN	NaN	NaN	115.84	NaN	-0.48
NaN	NaN	NaN	NaN	NaN	NaN	84.95	NaN	-0.7	NaN	NaN	NaN	NaN	NaN	NaN	NaN	NaN	NaN	115.94	NaN	-0.7
NaN	NaN	NaN	NaN	NaN	NaN	85.05	NaN	-0.71	NaN	NaN	NaN	NaN	NaN	NaN	NaN	NaN	NaN	116.04	NaN	-0.59
NaN	NaN	NaN	NaN	NaN	NaN	85.05	NaN	-0.63	NaN	NaN	NaN	NaN	NaN	NaN	NaN	NaN	NaN	116.14	NaN	-0.82
NaN	NaN	NaN	NaN	NaN	NaN	85.05	NaN	-0.69	NaN	NaN	NaN	NaN	NaN	NaN	NaN	NaN	NaN	116.24	NaN	-0.33
NaN	NaN	NaN	NaN	NaN	NaN	85.15	NaN	-0.67	NaN	NaN	NaN	NaN	NaN	NaN	NaN	NaN	NaN	116.34	NaN	-0.61
NaN	NaN	NaN	NaN	NaN	NaN	85.25	NaN	-0.61	NaN	NaN	NaN	NaN	NaN	NaN	NaN	NaN	NaN	116.44	NaN	-0.51
NaN	NaN	NaN	NaN	NaN	NaN	85.25	NaN	-0.67	NaN	NaN	NaN	NaN	NaN	NaN	NaN	NaN	NaN	116.54	NaN	-0.69
NaN	NaN	NaN	NaN	NaN	NaN	85.25	NaN	-0.8	NaN	NaN	NaN	NaN	NaN	NaN	NaN	NaN	NaN	116.64	NaN	-0.66
NaN	NaN	NaN	NaN	NaN	NaN	85.25	NaN	-0.75	NaN	NaN	NaN	NaN	NaN	NaN	NaN	NaN	NaN	116.74	NaN	-0.53
NaN	NaN	NaN	NaN	NaN	NaN	85.35	NaN	-0.69	NaN	NaN	NaN	NaN	NaN	NaN	NaN	NaN	NaN	116.84	NaN	-0.62
NaN	NaN	NaN	NaN	NaN	NaN	85.35	NaN	-0.53	NaN	NaN	NaN	NaN	NaN	NaN	NaN	NaN	NaN	116.94	NaN	-0.55
NaN	NaN	NaN	NaN	NaN	NaN	85.45	NaN	-0.44	NaN	NaN	NaN	NaN	NaN	NaN	NaN	NaN	NaN	117.04	NaN	-0.44
NaN	NaN	NaN	NaN	NaN	NaN	85.55	NaN	-0.29	NaN	NaN	NaN	NaN	NaN	NaN	NaN	NaN	NaN	117.14	NaN	-0.54
NaN	NaN	NaN	NaN	NaN	NaN	85.65	NaN	-0.02	NaN	NaN	NaN	NaN	NaN	NaN	NaN	NaN	NaN	117.24	NaN	-0.44
NaN	NaN	NaN	NaN	NaN	NaN	85.65	NaN	-0.24	NaN	NaN	NaN	NaN	NaN	NaN	NaN	NaN	NaN	117.34	NaN	-0.54
NaN	NaN	NaN	NaN	NaN	NaN	85.76	NaN	-0.39	NaN	NaN	NaN	NaN	NaN	NaN	NaN	NaN	NaN	117.44	NaN	-0.56
NaN	NaN	NaN	NaN	NaN	NaN	85.76	NaN	-1.25	NaN	NaN	NaN	NaN	NaN	NaN	NaN	NaN	NaN	117.54	NaN	-0.39
NaN	NaN	NaN	NaN	NaN	NaN	85.85	NaN	-0.46	NaN	NaN	NaN	NaN	NaN	NaN	NaN	NaN	NaN	117.64	NaN	-0.24
NaN	NaN	NaN	NaN	NaN	NaN	85.85	NaN	-0.23	NaN	NaN	NaN	NaN	NaN	NaN	NaN	NaN	NaN	117.84	NaN	0.14
NaN	NaN	NaN	NaN	NaN	NaN	85.86	NaN	-1.62	NaN	NaN	NaN	NaN	NaN	NaN	NaN	NaN	NaN	118.04	NaN	0.33
NaN	NaN	NaN	NaN	NaN	NaN	85.93	NaN	-0.32	NaN	NaN	NaN	NaN	NaN	NaN	NaN	NaN	NaN	118.14	NaN	-0.1
NaN	NaN	NaN	NaN	NaN	NaN	85.95	NaN	-0.24	NaN	NaN	NaN	NaN	NaN	NaN	NaN	NaN	NaN	118.24	NaN	-1.24
NaN	NaN	NaN	NaN	NaN	NaN	86.01	NaN	-0.53	NaN	NaN	NaN	NaN	NaN	NaN	NaN	NaN	NaN	118.34	NaN	-0.1
NaN	NaN	NaN	NaN	NaN	NaN	86.05	NaN	-0.24	NaN	NaN	NaN	NaN	NaN	NaN	NaN	NaN	NaN	118.44	NaN	-0.12
NaN	NaN	NaN	NaN	NaN	NaN	86.15	NaN	-0.43	NaN	NaN	NaN	NaN	NaN	NaN	NaN	NaN	NaN	118.54	NaN	-0.18
NaN	NaN	NaN	NaN	NaN	NaN	86.15	NaN	-0.32	NaN	NaN	NaN	NaN	NaN	NaN	NaN	NaN	NaN	118.64	NaN	-0.27
NaN	NaN	NaN	NaN	NaN	NaN	86.24	NaN	-0.56	NaN	NaN	NaN	NaN	NaN	NaN	NaN	NaN	NaN	118.7	NaN	-0.36
NaN	NaN	NaN	NaN	NaN	NaN	86.24	NaN	-0.65	NaN	NaN	NaN	NaN	NaN	NaN	NaN	NaN	NaN	118.8	NaN	-0.03
NaN	NaN	NaN	NaN	NaN	NaN	86.24	NaN	-0.12	NaN	NaN	NaN	NaN	NaN	NaN	NaN	NaN	NaN	118.9	NaN	-0.06
NaN	NaN	NaN	NaN	NaN	NaN	86.35	NaN	-0.7	NaN	NaN	NaN	NaN	NaN	NaN	NaN	NaN	NaN	119	NaN	-0.38
NaN	NaN	NaN	NaN	NaN	NaN	86.35	NaN	-0.49	NaN	NaN	NaN	NaN	NaN	NaN	NaN	NaN	NaN	119.4	NaN	-0.45
NaN	NaN	NaN	NaN	NaN	NaN	86.35	NaN	-0.82	NaN	NaN	NaN	NaN	NaN	NaN	NaN	NaN	NaN	119.5	NaN	-0.09
NaN	NaN	NaN	NaN	NaN	NaN	86.45	NaN	-0.67	NaN	NaN	NaN	NaN	NaN	NaN	NaN	NaN	NaN	119.6	NaN	0.35
NaN	NaN	NaN	NaN	NaN	NaN	86.45	NaN	-0.55	NaN	NaN	NaN	NaN	NaN	NaN	NaN	NaN	NaN	119.8	NaN	-0.12
NaN	NaN	NaN	NaN	NaN	NaN	86.45	NaN	-0.51	NaN	NaN	NaN	NaN	NaN	NaN	NaN	NaN	NaN	120	NaN	-0.33
NaN	NaN	NaN	NaN	NaN	NaN	86.45	NaN	-0.88	NaN	NaN	NaN	NaN	NaN	NaN	NaN	NaN	NaN	120.1	NaN	-0.22
NaN	NaN	NaN	NaN	NaN	NaN	86.52	NaN	-0.75	NaN	NaN	NaN	NaN	NaN	NaN	NaN	NaN	NaN	120.2	NaN	-0.29
NaN	NaN	NaN	NaN	NaN	NaN	86.55	NaN	-0.74	NaN	NaN	NaN	NaN	NaN	NaN	NaN	NaN	NaN	120.3	NaN	-0.84
NaN	NaN	NaN	NaN	NaN	NaN	86.55	NaN	-0.55	NaN	NaN	NaN	NaN	NaN	NaN	NaN	NaN	NaN	120.4	NaN	-0.6
NaN	NaN	NaN	NaN	NaN	NaN	86.62	NaN	-0.71	NaN	NaN	NaN	NaN	NaN	NaN	NaN	NaN	NaN	120.5	NaN	-0.36
NaN	NaN	NaN	NaN	NaN	NaN	86.65	NaN	-0.8	NaN	NaN	NaN	NaN	NaN	NaN	NaN	NaN	NaN	120.6	NaN	-0.33
NaN	NaN	NaN	NaN	NaN	NaN	86.65	NaN	-0.64	NaN	NaN	NaN	NaN	NaN	NaN	NaN	NaN	NaN	120.7	NaN	-0.27
NaN	NaN	NaN	NaN	NaN	NaN	86.65	NaN	-0.63	NaN	NaN	NaN	NaN	NaN	NaN	NaN	NaN	NaN	120.8	NaN	-0.08
NaN	NaN	NaN	NaN	NaN	NaN	86.65	NaN	-0.71	NaN	NaN	NaN	NaN	NaN	NaN	NaN	NaN	NaN	120.9	NaN	-0.04
NaN	NaN	NaN	NaN	NaN	NaN	86.71	NaN	-0.59	NaN	NaN	NaN	NaN	NaN	NaN	NaN	NaN	NaN	121	NaN	-0.22
NaN	NaN	NaN	NaN	NaN	NaN	86.76	NaN	-0.66	NaN	NaN	NaN	NaN	NaN	NaN	NaN	NaN	NaN	121.1	NaN	0.1
NaN	NaN	NaN	NaN	NaN	NaN	86.76	NaN	-0.64	NaN	NaN	NaN	NaN	NaN	NaN	NaN	NaN	NaN	121.2	NaN	-0.07
NaN	NaN	NaN	NaN	NaN	NaN	86.79	NaN	-0.7	NaN	NaN	NaN	NaN	NaN	NaN	NaN	NaN	NaN	121.3	NaN	0.39
NaN	NaN	NaN	NaN	NaN	NaN	86.85	NaN	-0.4	NaN	NaN	NaN	NaN	NaN	NaN	NaN	NaN	NaN	121.4	NaN	-0.11
NaN	NaN	NaN	NaN	NaN	NaN	86.87	NaN	-0.76	NaN	NaN	NaN	NaN	NaN	NaN	NaN	NaN	NaN	121.5	NaN	-0.73
NaN	NaN	NaN	NaN	NaN	NaN	86.95	NaN	-0.52	NaN	NaN	NaN	NaN	NaN	NaN	NaN	NaN	NaN	121.6	NaN	-0.14
NaN	NaN	NaN	NaN	NaN	NaN	86.95	NaN	-0.35	NaN	NaN	NaN	NaN	NaN	NaN	NaN	NaN	NaN	121.7	NaN	-0.08
NaN	NaN	NaN	NaN	NaN	NaN	86.99	NaN	-0.72	NaN	NaN	NaN	NaN	NaN	NaN	NaN	NaN	NaN	121.8	NaN	0.05
NaN	NaN	NaN	NaN	NaN	NaN	87.05	NaN	-0.37	NaN	NaN	NaN	NaN	NaN	NaN	NaN	NaN	NaN	121.9	NaN	-0.01
NaN	NaN	NaN	NaN	NaN	NaN	87.15	NaN	-0.63	NaN	NaN	NaN	NaN	NaN	NaN	NaN	NaN	NaN	122	NaN	0.01
NaN	NaN	NaN	NaN	NaN	NaN	87.15	NaN	-0.31	NaN	NaN	NaN	NaN	NaN	NaN	NaN	NaN	NaN	122.1	NaN	-0.24
NaN	NaN	NaN	NaN	NaN	NaN	87.15	NaN	-0.39	NaN	NaN	NaN	NaN	NaN	NaN	NaN	NaN	NaN	122.2	NaN	-0.23
NaN	NaN	NaN	NaN	NaN	NaN	87.23	NaN	-0.56	NaN	NaN	NaN	NaN	NaN	NaN	NaN	NaN	NaN	122.3	NaN	-0.3
NaN	NaN	NaN	NaN	NaN	NaN	87.25	NaN	-0.42	NaN	NaN	NaN	NaN	NaN	NaN	NaN	NaN	NaN	122.4	NaN	-0.3
NaN	NaN	NaN	NaN	NaN	NaN	87.25	NaN	-0.49	NaN	NaN	NaN	NaN	NaN	NaN	NaN	NaN	NaN	122.5	NaN	-0.39
NaN	NaN	NaN	NaN	NaN	NaN	87.28	NaN	-0.6	NaN	NaN	NaN	NaN	NaN	NaN	NaN	NaN	NaN	122.6	NaN	-0.2
NaN	NaN	NaN	NaN	NaN	NaN	87.35	NaN	-0.28	NaN	NaN	NaN	NaN	NaN	NaN	NaN	NaN	NaN	122.7	NaN	-0.23
NaN	NaN	NaN	NaN	NaN	NaN	87.45	NaN	-0.22	NaN	NaN	NaN	NaN	NaN	NaN	NaN	NaN	NaN	122.8	NaN	-0.53
NaN	NaN	NaN	NaN	NaN	NaN	87.48	NaN	-0.46	NaN	NaN	NaN	NaN	NaN	NaN	NaN	NaN	NaN	122.9	NaN	-0.08
NaN	NaN	NaN	NaN	NaN	NaN	87.55	NaN	-0.3	NaN	NaN	NaN	NaN	NaN	NaN	NaN	NaN	NaN	123	NaN	0.16
NaN	NaN	NaN	NaN	NaN	NaN	87.55	NaN	-0.35	NaN	NaN	NaN	NaN	NaN	NaN	NaN	NaN	NaN	123.1	NaN	-0.17
NaN	NaN	NaN	NaN	NaN	NaN	87.64	NaN	-0.44	NaN	NaN	NaN	NaN	NaN	NaN	NaN	NaN	NaN	123.2	NaN	0.23
NaN	NaN	NaN	NaN	NaN	NaN	87.65	NaN	-0.43	NaN	NaN	NaN	NaN	NaN	NaN	NaN	NaN	NaN	123.4	NaN	-0.05
NaN	NaN	NaN	NaN	NaN	NaN	87.75	NaN	-0.41	NaN	NaN	NaN	NaN	NaN	NaN	NaN	NaN	NaN	123.5	NaN	0.16
NaN	NaN	NaN	NaN	NaN	NaN	87.85	NaN	-0.84	NaN	NaN	NaN	NaN	NaN	NaN	NaN	NaN	NaN	123.6	NaN	-0.13
NaN	NaN	NaN	NaN	NaN	NaN	87.85	NaN	-0.76	NaN	NaN	NaN	NaN	NaN	NaN	NaN	NaN	NaN	123.7	NaN	-0.27
NaN	NaN	NaN	NaN	NaN	NaN	87.85	NaN	-0.41	NaN	NaN	NaN	NaN	NaN	NaN	NaN	NaN	NaN	124	NaN	-0.07
NaN	NaN	NaN	NaN	NaN	NaN	87.86	NaN	-0.61	NaN	NaN	NaN	NaN	NaN	NaN	NaN	NaN	NaN	124.1	NaN	-1.25
NaN	NaN	NaN	NaN	NaN	NaN	87.86	NaN	-0.26	NaN	NaN	NaN	NaN	NaN	NaN	NaN	NaN	NaN	124.2	NaN	-0.31
NaN	NaN	NaN	NaN	NaN	NaN	87.96	NaN	-0.48	NaN	NaN	NaN	NaN	NaN	NaN	NaN	NaN	NaN	124.3	NaN	-0.38
NaN	NaN	NaN	NaN	NaN	NaN	88.02	NaN	-0.44	NaN	NaN	NaN	NaN	NaN	NaN	NaN	NaN	NaN	124.4	NaN	-0.36
NaN	NaN	NaN	NaN	NaN	NaN	88.02	NaN	-0.7	NaN	NaN	NaN	NaN	NaN	NaN	NaN	NaN	NaN	124.5	NaN	-0.28
NaN	NaN	NaN	NaN	NaN	NaN	88.02	NaN	-0.38	NaN	NaN	NaN	NaN	NaN	NaN	NaN	NaN	NaN	124.6	NaN	-0.3
NaN	NaN	NaN	NaN	NaN	NaN	88.1	NaN	-0.53	NaN	NaN	NaN	NaN	NaN	NaN	NaN	NaN	NaN	124.7	NaN	-0.29
NaN	NaN	NaN	NaN	NaN	NaN	88.1	NaN	-0.34	NaN	NaN	NaN	NaN	NaN	NaN	NaN	NaN	NaN	124.8	NaN	-0.33
NaN	NaN	NaN	NaN	NaN	NaN	88.2	NaN	-0.6	NaN	NaN	NaN	NaN	NaN	NaN	NaN	NaN	NaN	124.9	NaN	-0.17
NaN	NaN	NaN	NaN	NaN	NaN	88.3	NaN	-0.61	NaN	NaN	NaN	NaN	NaN	NaN	NaN	NaN	NaN	125	NaN	-0.28
NaN	NaN	NaN	NaN	NaN	NaN	88.39	NaN	-0.6	NaN	NaN	NaN	NaN	NaN	NaN	NaN	NaN	NaN	125.1	NaN	-0.63
NaN	NaN	NaN	NaN	NaN	NaN	88.5	NaN	-0.64	NaN	NaN	NaN	NaN	NaN	NaN	NaN	NaN	NaN	125.2	NaN	-0.38
NaN	NaN	NaN	NaN	NaN	NaN	88.6	NaN	-0.65	NaN	NaN	NaN	NaN	NaN	NaN	NaN	NaN	NaN	125.3	NaN	-0.49
NaN	NaN	NaN	NaN	NaN	NaN	88.61	NaN	-0.4	NaN	NaN	NaN	NaN	NaN	NaN	NaN	NaN	NaN	125.4	NaN	-0.52
NaN	NaN	NaN	NaN	NaN	NaN	88.61	NaN	-0.49	NaN	NaN	NaN	NaN	NaN	NaN	NaN	NaN	NaN	125.46	NaN	-0.36
NaN	NaN	NaN	NaN	NaN	NaN	88.61	NaN	-1.07	NaN	NaN	NaN	NaN	NaN	NaN	NaN	NaN	NaN	125.5	NaN	-0.53
NaN	NaN	NaN	NaN	NaN	NaN	88.69	NaN	-0.72	NaN	NaN	NaN	NaN	NaN	NaN	NaN	NaN	NaN	125.56	NaN	-0.25
NaN	NaN	NaN	NaN	NaN	NaN	88.75	NaN	-0.18	NaN	NaN	NaN	NaN	NaN	NaN	NaN	NaN	NaN	125.6	NaN	-0.6
NaN	NaN	NaN	NaN	NaN	NaN	88.75	NaN	-0.64	NaN	NaN	NaN	NaN	NaN	NaN	NaN	NaN	NaN	125.66	NaN	-0.34
NaN	NaN	NaN	NaN	NaN	NaN	88.8	NaN	-0.61	NaN	NaN	NaN	NaN	NaN	NaN	NaN	NaN	NaN	125.7	NaN	-0.57
NaN	NaN	NaN	NaN	NaN	NaN	88.89	NaN	-0.49	NaN	NaN	NaN	NaN	NaN	NaN	NaN	NaN	NaN	125.76	NaN	-0.15
NaN	NaN	NaN	NaN	NaN	NaN	89.02	NaN	-0.34	NaN	NaN	NaN	NaN	NaN	NaN	NaN	NaN	NaN	125.8	NaN	-0.27
NaN	NaN	NaN	NaN	NaN	NaN	89.14	NaN	-0.25	NaN	NaN	NaN	NaN	NaN	NaN	NaN	NaN	NaN	125.86	NaN	-0.2
NaN	NaN	NaN	NaN	NaN	NaN	89.26	NaN	-0.13	NaN	NaN	NaN	NaN	NaN	NaN	NaN	NaN	NaN	125.9	NaN	-0.27
NaN	NaN	NaN	NaN	NaN	NaN	89.37	NaN	-0.33	NaN	NaN	NaN	NaN	NaN	NaN	NaN	NaN	NaN	125.96	NaN	-0.02
NaN	NaN	NaN	NaN	NaN	NaN	89.47	NaN	-0.41	NaN	NaN	NaN	NaN	NaN	NaN	NaN	NaN	NaN	126	NaN	-0.29
NaN	NaN	NaN	NaN	NaN	NaN	89.58	NaN	-0.38	NaN	NaN	NaN	NaN	NaN	NaN	NaN	NaN	NaN	126.06	NaN	-0.17
NaN	NaN	NaN	NaN	NaN	NaN	89.67	NaN	-0.74	NaN	NaN	NaN	NaN	NaN	NaN	NaN	NaN	NaN	126.1	NaN	-0.4
NaN	NaN	NaN	NaN	NaN	NaN	89.67	NaN	-0.63	NaN	NaN	NaN	NaN	NaN	NaN	NaN	NaN	NaN	126.16	NaN	0.08
NaN	NaN	NaN	NaN	NaN	NaN	89.67	NaN	-0.43	NaN	NaN	NaN	NaN	NaN	NaN	NaN	NaN	NaN	126.2	NaN	-0.29
NaN	NaN	NaN	NaN	NaN	NaN	89.67	NaN	-0.47	NaN	NaN	NaN	NaN	NaN	NaN	NaN	NaN	NaN	126.26	NaN	0.12
NaN	NaN	NaN	NaN	NaN	NaN	89.77	NaN	-0.46	NaN	NaN	NaN	NaN	NaN	NaN	NaN	NaN	NaN	126.3	NaN	-0.17
NaN	NaN	NaN	NaN	NaN	NaN	89.77	NaN	-0.84	NaN	NaN	NaN	NaN	NaN	NaN	NaN	NaN	NaN	126.36	NaN	0.03
NaN	NaN	NaN	NaN	NaN	NaN	89.87	NaN	-0.4	NaN	NaN	NaN	NaN	NaN	NaN	NaN	NaN	NaN	126.46	NaN	-0.01
NaN	NaN	NaN	NaN	NaN	NaN	89.96	NaN	-0.4	NaN	NaN	NaN	NaN	NaN	NaN	NaN	NaN	NaN	126.56	NaN	0.01
NaN	NaN	NaN	NaN	NaN	NaN	90.06	NaN	-0.28	NaN	NaN	NaN	NaN	NaN	NaN	NaN	NaN	NaN	126.66	NaN	0.31
NaN	NaN	NaN	NaN	NaN	NaN	90.15	NaN	-0.56	NaN	NaN	NaN	NaN	NaN	NaN	NaN	NaN	NaN	126.76	NaN	0.01
NaN	NaN	NaN	NaN	NaN	NaN	90.25	NaN	-0.37	NaN	NaN	NaN	NaN	NaN	NaN	NaN	NaN	NaN	126.86	NaN	0.12
NaN	NaN	NaN	NaN	NaN	NaN	90.34	NaN	-0.41	NaN	NaN	NaN	NaN	NaN	NaN	NaN	NaN	NaN	126.96	NaN	0.21
NaN	NaN	NaN	NaN	NaN	NaN	90.44	NaN	-0.12	NaN	NaN	NaN	NaN	NaN	NaN	NaN	NaN	NaN	127.06	NaN	-0.16
NaN	NaN	NaN	NaN	NaN	NaN	90.53	NaN	-0.14	NaN	NaN	NaN	NaN	NaN	NaN	NaN	NaN	NaN	127.16	NaN	-0.14
NaN	NaN	NaN	NaN	NaN	NaN	90.64	NaN	-0.04	NaN	NaN	NaN	NaN	NaN	NaN	NaN	NaN	NaN	127.26	NaN	-0.09
NaN	NaN	NaN	NaN	NaN	NaN	90.74	NaN	-0.07	NaN	NaN	NaN	NaN	NaN	NaN	NaN	NaN	NaN	127.36	NaN	0.04
NaN	NaN	NaN	NaN	NaN	NaN	90.95	NaN	-0.07	NaN	NaN	NaN	NaN	NaN	NaN	NaN	NaN	NaN	127.46	NaN	-0.16
NaN	NaN	NaN	NaN	NaN	NaN	91.05	NaN	0.18	NaN	NaN	NaN	NaN	NaN	NaN	NaN	NaN	NaN	127.56	NaN	0.16
NaN	NaN	NaN	NaN	NaN	NaN	91.15	NaN	-0.09	NaN	NaN	NaN	NaN	NaN	NaN	NaN	NaN	NaN	127.66	NaN	0.12
NaN	NaN	NaN	NaN	NaN	NaN	91.15	NaN	-0.37	NaN	NaN	NaN	NaN	NaN	NaN	NaN	NaN	NaN	127.76	NaN	0.31
NaN	NaN	NaN	NaN	NaN	NaN	91.26	NaN	-0.15	NaN	NaN	NaN	NaN	NaN	NaN	NaN	NaN	NaN	127.86	NaN	0.17
NaN	NaN	NaN	NaN	NaN	NaN	91.45	NaN	-0.19	NaN	NaN	NaN	NaN	NaN	NaN	NaN	NaN	NaN	127.96	NaN	0.27
NaN	NaN	NaN	NaN	NaN	NaN	91.55	NaN	-0.47	NaN	NaN	NaN	NaN	NaN	NaN	NaN	NaN	NaN	128.06	NaN	-0.03
NaN	NaN	NaN	NaN	NaN	NaN	91.55	NaN	-0.03	NaN	NaN	NaN	NaN	NaN	NaN	NaN	NaN	NaN	128.16	NaN	0.27
NaN	NaN	NaN	NaN	NaN	NaN	91.65	NaN	-0.06	NaN	NaN	NaN	NaN	NaN	NaN	NaN	NaN	NaN	128.36	NaN	-0.11
NaN	NaN	NaN	NaN	NaN	NaN	91.75	NaN	-0.06	NaN	NaN	NaN	NaN	NaN	NaN	NaN	NaN	NaN	129.06	NaN	-0.11
NaN	NaN	NaN	NaN	NaN	NaN	91.85	NaN	-0.01	NaN	NaN	NaN	NaN	NaN	NaN	NaN	NaN	NaN	129.16	NaN	-0.28
NaN	NaN	NaN	NaN	NaN	NaN	91.95	NaN	0.09	NaN	NaN	NaN	NaN	NaN	NaN	NaN	NaN	NaN	129.26	NaN	-0.39
NaN	NaN	NaN	NaN	NaN	NaN	92.05	NaN	-0.05	NaN	NaN	NaN	NaN	NaN	NaN	NaN	NaN	NaN	129.36	NaN	-0.11
NaN	NaN	NaN	NaN	NaN	NaN	92.15	NaN	0.02	NaN	NaN	NaN	NaN	NaN	NaN	NaN	NaN	NaN	129.46	NaN	-0.3
NaN	NaN	NaN	NaN	NaN	NaN	92.25	NaN	0.1	NaN	NaN	NaN	NaN	NaN	NaN	NaN	NaN	NaN	129.56	NaN	-0.25
NaN	NaN	NaN	NaN	NaN	NaN	92.35	NaN	0.13	NaN	NaN	NaN	NaN	NaN	NaN	NaN	NaN	NaN	129.66	NaN	-0.1
NaN	NaN	NaN	NaN	NaN	NaN	92.35	NaN	-0.21	NaN	NaN	NaN	NaN	NaN	NaN	NaN	NaN	NaN	129.76	NaN	0.18
NaN	NaN	NaN	NaN	NaN	NaN	92.35	NaN	-0.17	NaN	NaN	NaN	NaN	NaN	NaN	NaN	NaN	NaN	129.86	NaN	0.12
NaN	NaN	NaN	NaN	NaN	NaN	92.45	NaN	0.05	NaN	NaN	NaN	NaN	NaN	NaN	NaN	NaN	NaN	129.96	NaN	0.11
NaN	NaN	NaN	NaN	NaN	NaN	92.45	NaN	-0.28	NaN	NaN	NaN	NaN	NaN	NaN	NaN	NaN	NaN	130.06	NaN	0.08
NaN	NaN	NaN	NaN	NaN	NaN	92.55	NaN	-0.11	NaN	NaN	NaN	NaN	NaN	NaN	NaN	NaN	NaN	130.26	NaN	0.16
NaN	NaN	NaN	NaN	NaN	NaN	92.55	NaN	-0.11	NaN	NaN	NaN	NaN	NaN	NaN	NaN	NaN	NaN	130.36	NaN	-0.25
NaN	NaN	NaN	NaN	NaN	NaN	92.65	NaN	-0.2	NaN	NaN	NaN	NaN	NaN	NaN	NaN	NaN	NaN	130.46	NaN	-0.15
NaN	NaN	NaN	NaN	NaN	NaN	92.75	NaN	-0.1	NaN	NaN	NaN	NaN	NaN	NaN	NaN	NaN	NaN	130.56	NaN	0.05
NaN	NaN	NaN	NaN	NaN	NaN	92.75	NaN	-0.05	NaN	NaN	NaN	NaN	NaN	NaN	NaN	NaN	NaN	130.66	NaN	-0.35
NaN	NaN	NaN	NaN	NaN	NaN	92.85	NaN	-0.47	NaN	NaN	NaN	NaN	NaN	NaN	NaN	NaN	NaN	130.76	NaN	-0.13
NaN	NaN	NaN	NaN	NaN	NaN	92.85	NaN	-0.72	NaN	NaN	NaN	NaN	NaN	NaN	NaN	NaN	NaN	130.86	NaN	-0.32
NaN	NaN	NaN	NaN	NaN	NaN	92.95	NaN	-0.4	NaN	NaN	NaN	NaN	NaN	NaN	NaN	NaN	NaN	130.96	NaN	0.01
NaN	NaN	NaN	NaN	NaN	NaN	93.05	NaN	-0.96	NaN	NaN	NaN	NaN	NaN	NaN	NaN	NaN	NaN	131.06	NaN	0.05
NaN	NaN	NaN	NaN	NaN	NaN	93.05	NaN	-0.64	NaN	NaN	NaN	NaN	NaN	NaN	NaN	NaN	NaN	131.16	NaN	0.53
NaN	NaN	NaN	NaN	NaN	NaN	93.16	NaN	-0.59	NaN	NaN	NaN	NaN	NaN	NaN	NaN	NaN	NaN	131.26	NaN	0.08
NaN	NaN	NaN	NaN	NaN	NaN	93.26	NaN	-0.24	NaN	NaN	NaN	NaN	NaN	NaN	NaN	NaN	NaN	131.36	NaN	-0.06
NaN	NaN	NaN	NaN	NaN	NaN	93.26	NaN	-0.03	NaN	NaN	NaN	NaN	NaN	NaN	NaN	NaN	NaN	131.46	NaN	-0.63
NaN	NaN	NaN	NaN	NaN	NaN	93.36	NaN	-0.49	NaN	NaN	NaN	NaN	NaN	NaN	NaN	NaN	NaN	131.56	NaN	0.2
NaN	NaN	NaN	NaN	NaN	NaN	93.46	NaN	-0.7	NaN	NaN	NaN	NaN	NaN	NaN	NaN	NaN	NaN	131.66	NaN	-0.16
NaN	NaN	NaN	NaN	NaN	NaN	93.56	NaN	-0.72	NaN	NaN	NaN	NaN	NaN	NaN	NaN	NaN	NaN	131.76	NaN	-0.39
NaN	NaN	NaN	NaN	NaN	NaN	93.66	NaN	-0.71	NaN	NaN	NaN	NaN	NaN	NaN	NaN	NaN	NaN	131.86	NaN	-0.3
NaN	NaN	NaN	NaN	NaN	NaN	93.66	NaN	-0.65	NaN	NaN	NaN	NaN	NaN	NaN	NaN	NaN	NaN	131.96	NaN	-0.45
NaN	NaN	NaN	NaN	NaN	NaN	93.85	NaN	-0.68	NaN	NaN	NaN	NaN	NaN	NaN	NaN	NaN	NaN	132.06	NaN	-0.17
NaN	NaN	NaN	NaN	NaN	NaN	93.95	NaN	-0.49	NaN	NaN	NaN	NaN	NaN	NaN	NaN	NaN	NaN	132.16	NaN	-0.39
NaN	NaN	NaN	NaN	NaN	NaN	94.05	NaN	-0.44	NaN	NaN	NaN	NaN	NaN	NaN	NaN	NaN	NaN	132.26	NaN	-0.05
NaN	NaN	NaN	NaN	NaN	NaN	94.14	NaN	-0.56	NaN	NaN	NaN	NaN	NaN	NaN	NaN	NaN	NaN	132.36	NaN	-0.18
NaN	NaN	NaN	NaN	NaN	NaN	94.24	NaN	-0.51	NaN	NaN	NaN	NaN	NaN	NaN	NaN	NaN	NaN	132.46	NaN	-0.13
NaN	NaN	NaN	NaN	NaN	NaN	94.34	NaN	-0.02	NaN	NaN	NaN	NaN	NaN	NaN	NaN	NaN	NaN	132.56	NaN	-0.07
NaN	NaN	NaN	NaN	NaN	NaN	94.44	NaN	-0.04	NaN	NaN	NaN	NaN	NaN	NaN	NaN	NaN	NaN	132.66	NaN	-0.47
NaN	NaN	NaN	NaN	NaN	NaN	94.55	NaN	-0.19	NaN	NaN	NaN	NaN	NaN	NaN	NaN	NaN	NaN	132.76	NaN	-0.31
NaN	NaN	NaN	NaN	NaN	NaN	94.65	NaN	0.01	NaN	NaN	NaN	NaN	NaN	NaN	NaN	NaN	NaN	132.86	NaN	-0.17
NaN	NaN	NaN	NaN	NaN	NaN	94.75	NaN	-0.21	NaN	NaN	NaN	NaN	NaN	NaN	NaN	NaN	NaN	132.96	NaN	-0.15
NaN	NaN	NaN	NaN	NaN	NaN	94.96	NaN	-0.15	NaN	NaN	NaN	NaN	NaN	NaN	NaN	NaN	NaN	133.06	NaN	-0.25
NaN	NaN	NaN	NaN	NaN	NaN	95.06	NaN	-0.35	NaN	NaN	NaN	NaN	NaN	NaN	NaN	NaN	NaN	133.16	NaN	-0.12
NaN	NaN	NaN	NaN	NaN	NaN	95.16	NaN	-0.61	NaN	NaN	NaN	NaN	NaN	NaN	NaN	NaN	NaN	133.26	NaN	-0.53
NaN	NaN	NaN	NaN	NaN	NaN	95.26	NaN	-0.78	NaN	NaN	NaN	NaN	NaN	NaN	NaN	NaN	NaN	133.36	NaN	-0.23
NaN	NaN	NaN	NaN	NaN	NaN	95.35	NaN	-0.67	NaN	NaN	NaN	NaN	NaN	NaN	NaN	NaN	NaN	133.46	NaN	-0.39
NaN	NaN	NaN	NaN	NaN	NaN	95.45	NaN	-0.77	NaN	NaN	NaN	NaN	NaN	NaN	NaN	NaN	NaN	133.56	NaN	-0.27
NaN	NaN	NaN	NaN	NaN	NaN	95.49	NaN	-0.57	NaN	NaN	NaN	NaN	NaN	NaN	NaN	NaN	NaN	133.66	NaN	-0.15
NaN	NaN	NaN	NaN	NaN	NaN	95.49	NaN	-0.5	NaN	NaN	NaN	NaN	NaN	NaN	NaN	NaN	NaN	133.76	NaN	-0.27
NaN	NaN	NaN	NaN	NaN	NaN	95.54	NaN	-0.84	NaN	NaN	NaN	NaN	NaN	NaN	NaN	NaN	NaN	133.86	NaN	-0.77
NaN	NaN	NaN	NaN	NaN	NaN	95.59	NaN	-0.42	NaN	NaN	NaN	NaN	NaN	NaN	NaN	NaN	NaN	133.96	NaN	-0.82
NaN	NaN	NaN	NaN	NaN	NaN	95.59	NaN	-0.39	NaN	NaN	NaN	NaN	NaN	NaN	NaN	NaN	NaN	134.06	NaN	-0.4
NaN	NaN	NaN	NaN	NaN	NaN	95.63	NaN	-0.62	NaN	NaN	NaN	NaN	NaN	NaN	NaN	NaN	NaN	134.16	NaN	-0.79
NaN	NaN	NaN	NaN	NaN	NaN	95.68	NaN	-0.35	NaN	NaN	NaN	NaN	NaN	NaN	NaN	NaN	NaN	134.26	NaN	-0.37
NaN	NaN	NaN	NaN	NaN	NaN	95.72	NaN	-0.55	NaN	NaN	NaN	NaN	NaN	NaN	NaN	NaN	NaN	134.36	NaN	-0.34
NaN	NaN	NaN	NaN	NaN	NaN	95.79	NaN	-0.51	NaN	NaN	NaN	NaN	NaN	NaN	NaN	NaN	NaN	134.46	NaN	-0.46
NaN	NaN	NaN	NaN	NaN	NaN	95.82	NaN	-0.6	NaN	NaN	NaN	NaN	NaN	NaN	NaN	NaN	NaN	134.56	NaN	-0.3
NaN	NaN	NaN	NaN	NaN	NaN	95.9	NaN	-0.67	NaN	NaN	NaN	NaN	NaN	NaN	NaN	NaN	NaN	134.66	NaN	-0.44
NaN	NaN	NaN	NaN	NaN	NaN	95.9	NaN	-0.73	NaN	NaN	NaN	NaN	NaN	NaN	NaN	NaN	NaN	134.76	NaN	-0.45
NaN	NaN	NaN	NaN	NaN	NaN	95.9	NaN	-0.1	NaN	NaN	NaN	NaN	NaN	NaN	NaN	NaN	NaN	134.86	NaN	-1.05
NaN	NaN	NaN	NaN	NaN	NaN	95.91	NaN	-0.03	NaN	NaN	NaN	NaN	NaN	NaN	NaN	NaN	NaN	134.96	NaN	-0.45
NaN	NaN	NaN	NaN	NaN	NaN	96.02	NaN	-0.55	NaN	NaN	NaN	NaN	NaN	NaN	NaN	NaN	NaN	135.06	NaN	-0.39
NaN	NaN	NaN	NaN	NaN	NaN	96.02	NaN	-0.93	NaN	NaN	NaN	NaN	NaN	NaN	NaN	NaN	NaN	135.16	NaN	-0.55
NaN	NaN	NaN	NaN	NaN	NaN	96.02	NaN	-0.79	NaN	NaN	NaN	NaN	NaN	NaN	NaN	NaN	NaN	135.26	NaN	-0.25
NaN	NaN	NaN	NaN	NaN	NaN	96.1	NaN	-0.29	NaN	NaN	NaN	NaN	NaN	NaN	NaN	NaN	NaN	135.36	NaN	-0.46
NaN	NaN	NaN	NaN	NaN	NaN	96.13	NaN	-0.45	NaN	NaN	NaN	NaN	NaN	NaN	NaN	NaN	NaN	135.56	NaN	-0.18
NaN	NaN	NaN	NaN	NaN	NaN	96.13	NaN	-0.16	NaN	NaN	NaN	NaN	NaN	NaN	NaN	NaN	NaN	135.66	NaN	-0.47
NaN	NaN	NaN	NaN	NaN	NaN	96.19	NaN	-0.46	NaN	NaN	NaN	NaN	NaN	NaN	NaN	NaN	NaN	135.76	NaN	-0.57
NaN	NaN	NaN	NaN	NaN	NaN	96.23	NaN	-0.43	NaN	NaN	NaN	NaN	NaN	NaN	NaN	NaN	NaN	135.86	NaN	-0.2
NaN	NaN	NaN	NaN	NaN	NaN	96.23	NaN	-0.26	NaN	NaN	NaN	NaN	NaN	NaN	NaN	NaN	NaN	135.96	NaN	-0.05
NaN	NaN	NaN	NaN	NaN	NaN	96.29	NaN	-0.55	NaN	NaN	NaN	NaN	NaN	NaN	NaN	NaN	NaN	136.06	NaN	-0.18
NaN	NaN	NaN	NaN	NaN	NaN	96.32	NaN	-0.44	NaN	NaN	NaN	NaN	NaN	NaN	NaN	NaN	NaN	136.16	NaN	-0.2
NaN	NaN	NaN	NaN	NaN	NaN	96.38	NaN	-0.69	NaN	NaN	NaN	NaN	NaN	NaN	NaN	NaN	NaN	136.26	NaN	-0.22
NaN	NaN	NaN	NaN	NaN	NaN	96.4	NaN	-0.46	NaN	NaN	NaN	NaN	NaN	NaN	NaN	NaN	NaN	136.36	NaN	0.02
NaN	NaN	NaN	NaN	NaN	NaN	96.48	NaN	-0.72	NaN	NaN	NaN	NaN	NaN	NaN	NaN	NaN	NaN	136.46	NaN	0.41
NaN	NaN	NaN	NaN	NaN	NaN	96.57	NaN	-0.78	NaN	NaN	NaN	NaN	NaN	NaN	NaN	NaN	NaN	136.56	NaN	-0.24
NaN	NaN	NaN	NaN	NaN	NaN	96.57	NaN	-0.8	NaN	NaN	NaN	NaN	NaN	NaN	NaN	NaN	NaN	136.66	NaN	-0.14
NaN	NaN	NaN	NaN	NaN	NaN	96.66	NaN	-0.72	NaN	NaN	NaN	NaN	NaN	NaN	NaN	NaN	NaN	136.76	NaN	0.34
NaN	NaN	NaN	NaN	NaN	NaN	96.67	NaN	-0.88	NaN	NaN	NaN	NaN	NaN	NaN	NaN	NaN	NaN	136.86	NaN	0.35
NaN	NaN	NaN	NaN	NaN	NaN	96.67	NaN	-0.84	NaN	NaN	NaN	NaN	NaN	NaN	NaN	NaN	NaN	136.96	NaN	-0.26
NaN	NaN	NaN	NaN	NaN	NaN	96.75	NaN	-0.86	NaN	NaN	NaN	NaN	NaN	NaN	NaN	NaN	NaN	137.06	NaN	-0.14
NaN	NaN	NaN	NaN	NaN	NaN	96.77	NaN	-0.79	NaN	NaN	NaN	NaN	NaN	NaN	NaN	NaN	NaN	137.16	NaN	-0.17
NaN	NaN	NaN	NaN	NaN	NaN	96.85	NaN	-0.91	NaN	NaN	NaN	NaN	NaN	NaN	NaN	NaN	NaN	137.26	NaN	-0.2
NaN	NaN	NaN	NaN	NaN	NaN	96.89	NaN	-0.74	NaN	NaN	NaN	NaN	NaN	NaN	NaN	NaN	NaN	137.36	NaN	-0.11
NaN	NaN	NaN	NaN	NaN	NaN	96.94	NaN	-0.9	NaN	NaN	NaN	NaN	NaN	NaN	NaN	NaN	NaN	137.46	NaN	0.23
NaN	NaN	NaN	NaN	NaN	NaN	97	NaN	-0.85	NaN	NaN	NaN	NaN	NaN	NaN	NaN	NaN	NaN	137.56	NaN	0.2
NaN	NaN	NaN	NaN	NaN	NaN	97.03	NaN	-0.89	NaN	NaN	NaN	NaN	NaN	NaN	NaN	NaN	NaN	137.66	NaN	0.17
NaN	NaN	NaN	NaN	NaN	NaN	97.03	NaN	-0.91	NaN	NaN	NaN	NaN	NaN	NaN	NaN	NaN	NaN	137.76	NaN	-0.09
NaN	NaN	NaN	NaN	NaN	NaN	97.1	NaN	-0.72	NaN	NaN	NaN	NaN	NaN	NaN	NaN	NaN	NaN	137.86	NaN	-0.35
NaN	NaN	NaN	NaN	NaN	NaN	97.1	NaN	-0.81	NaN	NaN	NaN	NaN	NaN	NaN	NaN	NaN	NaN	137.96	NaN	-0.3
NaN	NaN	NaN	NaN	NaN	NaN	97.13	NaN	-0.89	NaN	NaN	NaN	NaN	NaN	NaN	NaN	NaN	NaN	138.12	NaN	-0.85
NaN	NaN	NaN	NaN	NaN	NaN	97.13	NaN	-0.83	NaN	NaN	NaN	NaN	NaN	NaN	NaN	NaN	NaN	138.22	NaN	-0.6
NaN	NaN	NaN	NaN	NaN	NaN	97.19	NaN	-0.74	NaN	NaN	NaN	NaN	NaN	NaN	NaN	NaN	NaN	138.32	NaN	-0.36
NaN	NaN	NaN	NaN	NaN	NaN	97.23	NaN	-0.13	NaN	NaN	NaN	NaN	NaN	NaN	NaN	NaN	NaN	138.42	NaN	-0.43
NaN	NaN	NaN	NaN	NaN	NaN	97.23	NaN	-0.51	NaN	NaN	NaN	NaN	NaN	NaN	NaN	NaN	NaN	138.52	NaN	-0.53
NaN	NaN	NaN	NaN	NaN	NaN	97.23	NaN	-0.19	NaN	NaN	NaN	NaN	NaN	NaN	NaN	NaN	NaN	138.82	NaN	0.1
NaN	NaN	NaN	NaN	NaN	NaN	97.29	NaN	-0.89	NaN	NaN	NaN	NaN	NaN	NaN	NaN	NaN	NaN	138.92	NaN	0.27
NaN	NaN	NaN	NaN	NaN	NaN	97.33	NaN	-0.32	NaN	NaN	NaN	NaN	NaN	NaN	NaN	NaN	NaN	139.02	NaN	0.34
NaN	NaN	NaN	NaN	NaN	NaN	97.38	NaN	-0.55	NaN	NaN	NaN	NaN	NaN	NaN	NaN	NaN	NaN	139.12	NaN	0.2
NaN	NaN	NaN	NaN	NaN	NaN	97.43	NaN	-0.58	NaN	NaN	NaN	NaN	NaN	NaN	NaN	NaN	NaN	139.22	NaN	0.09
NaN	NaN	NaN	NaN	NaN	NaN	97.48	NaN	-0.84	NaN	NaN	NaN	NaN	NaN	NaN	NaN	NaN	NaN	139.32	NaN	0.34
NaN	NaN	NaN	NaN	NaN	NaN	97.53	NaN	-0.6	NaN	NaN	NaN	NaN	NaN	NaN	NaN	NaN	NaN	139.42	NaN	0.34
NaN	NaN	NaN	NaN	NaN	NaN	97.59	NaN	-0.66	NaN	NaN	NaN	NaN	NaN	NaN	NaN	NaN	NaN	139.52	NaN	0.3
NaN	NaN	NaN	NaN	NaN	NaN	97.63	NaN	-0.58	NaN	NaN	NaN	NaN	NaN	NaN	NaN	NaN	NaN	139.62	NaN	-0.4
NaN	NaN	NaN	NaN	NaN	NaN	97.71	NaN	-0.64	NaN	NaN	NaN	NaN	NaN	NaN	NaN	NaN	NaN	139.72	NaN	-0.05
NaN	NaN	NaN	NaN	NaN	NaN	97.73	NaN	-0.44	NaN	NaN	NaN	NaN	NaN	NaN	NaN	NaN	NaN	139.82	NaN	-0.09
NaN	NaN	NaN	NaN	NaN	NaN	97.81	NaN	-0.53	NaN	NaN	NaN	NaN	NaN	NaN	NaN	NaN	NaN	139.92	NaN	0.41
NaN	NaN	NaN	NaN	NaN	NaN	97.83	NaN	-0.36	NaN	NaN	NaN	NaN	NaN	NaN	NaN	NaN	NaN	140.02	NaN	0.3
NaN	NaN	NaN	NaN	NaN	NaN	97.91	NaN	-1.5	NaN	NaN	NaN	NaN	NaN	NaN	NaN	NaN	NaN	140.12	NaN	-0.14
NaN	NaN	NaN	NaN	NaN	NaN	97.91	NaN	-0.72	NaN	NaN	NaN	NaN	NaN	NaN	NaN	NaN	NaN	140.22	NaN	0.12
NaN	NaN	NaN	NaN	NaN	NaN	97.94	NaN	-0.78	NaN	NaN	NaN	NaN	NaN	NaN	NaN	NaN	NaN	140.32	NaN	0.62
NaN	NaN	NaN	NaN	NaN	NaN	98	NaN	-0.48	NaN	NaN	NaN	NaN	NaN	NaN	NaN	NaN	NaN	140.42	NaN	0.19
NaN	NaN	NaN	NaN	NaN	NaN	98.09	NaN	-0.32	NaN	NaN	NaN	NaN	NaN	NaN	NaN	NaN	NaN	140.52	NaN	0.76
NaN	NaN	NaN	NaN	NaN	NaN	98.1	NaN	-0.1	NaN	NaN	NaN	NaN	NaN	NaN	NaN	NaN	NaN	140.62	NaN	0.66
NaN	NaN	NaN	NaN	NaN	NaN	98.21	NaN	-0.05	NaN	NaN	NaN	NaN	NaN	NaN	NaN	NaN	NaN	140.72	NaN	-0.09
NaN	NaN	NaN	NaN	NaN	NaN	98.22	NaN	-0.38	NaN	NaN	NaN	NaN	NaN	NaN	NaN	NaN	NaN	140.82	NaN	0.75
NaN	NaN	NaN	NaN	NaN	NaN	98.22	NaN	-0.51	NaN	NaN	NaN	NaN	NaN	NaN	NaN	NaN	NaN	140.92	NaN	0.28
NaN	NaN	NaN	NaN	NaN	NaN	98.35	NaN	-0.45	NaN	NaN	NaN	NaN	NaN	NaN	NaN	NaN	NaN	141.12	NaN	0.14
NaN	NaN	NaN	NaN	NaN	NaN	98.51	NaN	-0.13	NaN	NaN	NaN	NaN	NaN	NaN	NaN	NaN	NaN	141.22	NaN	-0.08
NaN	NaN	NaN	NaN	NaN	NaN	98.7	NaN	-0.05	NaN	NaN	NaN	NaN	NaN	NaN	NaN	NaN	NaN	141.32	NaN	-0.07
NaN	NaN	NaN	NaN	NaN	NaN	98.75	NaN	-0.12	NaN	NaN	NaN	NaN	NaN	NaN	NaN	NaN	NaN	141.42	NaN	0.08
NaN	NaN	NaN	NaN	NaN	NaN	98.85	NaN	-0.06	NaN	NaN	NaN	NaN	NaN	NaN	NaN	NaN	NaN	141.62	NaN	-0.12
NaN	NaN	NaN	NaN	NaN	NaN	98.95	NaN	-0.06	NaN	NaN	NaN	NaN	NaN	NaN	NaN	NaN	NaN	141.72	NaN	0.1
NaN	NaN	NaN	NaN	NaN	NaN	99.05	NaN	-0.25	NaN	NaN	NaN	NaN	NaN	NaN	NaN	NaN	NaN	141.82	NaN	-0.08
NaN	NaN	NaN	NaN	NaN	NaN	99.15	NaN	-0.06	NaN	NaN	NaN	NaN	NaN	NaN	NaN	NaN	NaN	142.02	NaN	0.47
NaN	NaN	NaN	NaN	NaN	NaN	99.25	NaN	-0.25	NaN	NaN	NaN	NaN	NaN	NaN	NaN	NaN	NaN	142.32	NaN	0.44
NaN	NaN	NaN	NaN	NaN	NaN	99.35	NaN	-0.25	NaN	NaN	NaN	NaN	NaN	NaN	NaN	NaN	NaN	142.42	NaN	-0.44
NaN	NaN	NaN	NaN	NaN	NaN	99.45	NaN	-0.07	NaN	NaN	NaN	NaN	NaN	NaN	NaN	NaN	NaN	142.52	NaN	-0.2
NaN	NaN	NaN	NaN	NaN	NaN	99.55	NaN	-0.12	NaN	NaN	NaN	NaN	NaN	NaN	NaN	NaN	NaN	142.72	NaN	-0.19
NaN	NaN	NaN	NaN	NaN	NaN	99.65	NaN	-0.2	NaN	NaN	NaN	NaN	NaN	NaN	NaN	NaN	NaN	142.82	NaN	0.42
NaN	NaN	NaN	NaN	NaN	NaN	99.75	NaN	-0.28	NaN	NaN	NaN	NaN	NaN	NaN	NaN	NaN	NaN	143.02	NaN	-0.28
NaN	NaN	NaN	NaN	NaN	NaN	99.85	NaN	-0.03	NaN	NaN	NaN	NaN	NaN	NaN	NaN	NaN	NaN	143.12	NaN	0.12
NaN	NaN	NaN	NaN	NaN	NaN	99.95	NaN	-0.06	NaN	NaN	NaN	NaN	NaN	NaN	NaN	NaN	NaN	143.32	NaN	0.45
NaN	NaN	NaN	NaN	NaN	NaN	100.05	NaN	0.02	NaN	NaN	NaN	NaN	NaN	NaN	NaN	NaN	NaN	143.64	NaN	-0.2
NaN	NaN	NaN	NaN	NaN	NaN	100.15	NaN	0.12	NaN	NaN	NaN	NaN	NaN	NaN	NaN	NaN	NaN	143.74	NaN	-0.51
NaN	NaN	NaN	NaN	NaN	NaN	100.15	NaN	-0.16	NaN	NaN	NaN	NaN	NaN	NaN	NaN	NaN	NaN	143.94	NaN	-0.43
NaN	NaN	NaN	NaN	NaN	NaN	100.25	NaN	-0.17	NaN	NaN	NaN	NaN	NaN	NaN	NaN	NaN	NaN	144.04	NaN	-0.35
NaN	NaN	NaN	NaN	NaN	NaN	100.35	NaN	-0.2	NaN	NaN	NaN	NaN	NaN	NaN	NaN	NaN	NaN	144.14	NaN	-0.37
NaN	NaN	NaN	NaN	NaN	NaN	100.45	NaN	-0.15	NaN	NaN	NaN	NaN	NaN	NaN	NaN	NaN	NaN	144.24	NaN	-0.21
NaN	NaN	NaN	NaN	NaN	NaN	100.55	NaN	-0.28	NaN	NaN	NaN	NaN	NaN	NaN	NaN	NaN	NaN	144.34	NaN	-0.28
NaN	NaN	NaN	NaN	NaN	NaN	100.65	NaN	-0.35	NaN	NaN	NaN	NaN	NaN	NaN	NaN	NaN	NaN	144.44	NaN	-0.41
NaN	NaN	NaN	NaN	NaN	NaN	100.75	NaN	-0.58	NaN	NaN	NaN	NaN	NaN	NaN	NaN	NaN	NaN	144.54	NaN	-0.56
NaN	NaN	NaN	NaN	NaN	NaN	100.85	NaN	-0.73	NaN	NaN	NaN	NaN	NaN	NaN	NaN	NaN	NaN	144.64	NaN	-0.2
NaN	NaN	NaN	NaN	NaN	NaN	100.95	NaN	-0.74	NaN	NaN	NaN	NaN	NaN	NaN	NaN	NaN	NaN	144.74	NaN	-0.28
NaN	NaN	NaN	NaN	NaN	NaN	101.05	NaN	-0.54	NaN	NaN	NaN	NaN	NaN	NaN	NaN	NaN	NaN	144.94	NaN	-0.21
NaN	NaN	NaN	NaN	NaN	NaN	101.15	NaN	-0.61	NaN	NaN	NaN	NaN	NaN	NaN	NaN	NaN	NaN	145.04	NaN	-0.27
NaN	NaN	NaN	NaN	NaN	NaN	101.25	NaN	-0.59	NaN	NaN	NaN	NaN	NaN	NaN	NaN	NaN	NaN	145.24	NaN	-0.24
NaN	NaN	NaN	NaN	NaN	NaN	101.35	NaN	-0.46	NaN	NaN	NaN	NaN	NaN	NaN	NaN	NaN	NaN	145.44	NaN	0.27
NaN	NaN	NaN	NaN	NaN	NaN	101.45	NaN	-0.63	NaN	NaN	NaN	NaN	NaN	NaN	NaN	NaN	NaN	145.54	NaN	-1.37
NaN	NaN	NaN	NaN	NaN	NaN	101.55	NaN	-0.45	NaN	NaN	NaN	NaN	NaN	NaN	NaN	NaN	NaN	145.64	NaN	-0.36
NaN	NaN	NaN	NaN	NaN	NaN	101.65	NaN	-0.34	NaN	NaN	NaN	NaN	NaN	NaN	NaN	NaN	NaN	145.74	NaN	-0.25
NaN	NaN	NaN	NaN	NaN	NaN	101.75	NaN	-0.14	NaN	NaN	NaN	NaN	NaN	NaN	NaN	NaN	NaN	145.84	NaN	-0.24
NaN	NaN	NaN	NaN	NaN	NaN	101.85	NaN	-0.04	NaN	NaN	NaN	NaN	NaN	NaN	NaN	NaN	NaN	145.94	NaN	-0.24
NaN	NaN	NaN	NaN	NaN	NaN	101.95	NaN	-0.14	NaN	NaN	NaN	NaN	NaN	NaN	NaN	NaN	NaN	146.04	NaN	-0.28
NaN	NaN	NaN	NaN	NaN	NaN	102.25	NaN	-0.15	NaN	NaN	NaN	NaN	NaN	NaN	NaN	NaN	NaN	146.14	NaN	-0.23
NaN	NaN	NaN	NaN	NaN	NaN	102.35	NaN	0.06	NaN	NaN	NaN	NaN	NaN	NaN	NaN	NaN	NaN	146.24	NaN	-0.25
NaN	NaN	NaN	NaN	NaN	NaN	102.45	NaN	-0.11	NaN	NaN	NaN	NaN	NaN	NaN	NaN	NaN	NaN	146.46	NaN	-0.09
NaN	NaN	NaN	NaN	NaN	NaN	102.45	NaN	-0.14	NaN	NaN	NaN	NaN	NaN	NaN	NaN	NaN	NaN	146.56	NaN	-0.26
NaN	NaN	NaN	NaN	NaN	NaN	102.55	NaN	-0.06	NaN	NaN	NaN	NaN	NaN	NaN	NaN	NaN	NaN	146.66	NaN	-0.18
NaN	NaN	NaN	NaN	NaN	NaN	102.65	NaN	-0.19	NaN	NaN	NaN	NaN	NaN	NaN	NaN	NaN	NaN	146.76	NaN	-0.81
NaN	NaN	NaN	NaN	NaN	NaN	102.75	NaN	-0.26	NaN	NaN	NaN	NaN	NaN	NaN	NaN	NaN	NaN	146.86	NaN	-0.25
NaN	NaN	NaN	NaN	NaN	NaN	102.85	NaN	-0.61	NaN	NaN	NaN	NaN	NaN	NaN	NaN	NaN	NaN	146.96	NaN	-0.48
NaN	NaN	NaN	NaN	NaN	NaN	102.85	NaN	-0.52	NaN	NaN	NaN	NaN	NaN	NaN	NaN	NaN	NaN	147.06	NaN	-0.33
NaN	NaN	NaN	NaN	NaN	NaN	102.95	NaN	-0.83	NaN	NaN	NaN	NaN	NaN	NaN	NaN	NaN	NaN	147.16	NaN	-0.43
NaN	NaN	NaN	NaN	NaN	NaN	102.95	NaN	-0.13	NaN	NaN	NaN	NaN	NaN	NaN	NaN	NaN	NaN	147.26	NaN	-0.39
NaN	NaN	NaN	NaN	NaN	NaN	103.05	NaN	-0.4	NaN	NaN	NaN	NaN	NaN	NaN	NaN	NaN	NaN	147.36	NaN	-0.34
NaN	NaN	NaN	NaN	NaN	NaN	103.15	NaN	-0.43	NaN	NaN	NaN	NaN	NaN	NaN	NaN	NaN	NaN	147.46	NaN	-0.49
NaN	NaN	NaN	NaN	NaN	NaN	103.25	NaN	-0.36	NaN	NaN	NaN	NaN	NaN	NaN	NaN	NaN	NaN	147.56	NaN	-0.41
NaN	NaN	NaN	NaN	NaN	NaN	103.35	NaN	-0.37	NaN	NaN	NaN	NaN	NaN	NaN	NaN	NaN	NaN	147.66	NaN	-0.26
NaN	NaN	NaN	NaN	NaN	NaN	103.55	NaN	-0.33	NaN	NaN	NaN	NaN	NaN	NaN	NaN	NaN	NaN	147.76	NaN	-0.32
NaN	NaN	NaN	NaN	NaN	NaN	103.75	NaN	-0.04	NaN	NaN	NaN	NaN	NaN	NaN	NaN	NaN	NaN	147.86	NaN	-0.14
NaN	NaN	NaN	NaN	NaN	NaN	103.85	NaN	0.11	NaN	NaN	NaN	NaN	NaN	NaN	NaN	NaN	NaN	147.96	NaN	-0.27
NaN	NaN	NaN	NaN	NaN	NaN	103.95	NaN	0.08	NaN	NaN	NaN	NaN	NaN	NaN	NaN	NaN	NaN	148.06	NaN	-0.3
NaN	NaN	NaN	NaN	NaN	NaN	104.05	NaN	0.08	NaN	NaN	NaN	NaN	NaN	NaN	NaN	NaN	NaN	148.16	NaN	-0.23
NaN	NaN	NaN	NaN	NaN	NaN	104.15	NaN	0.12	NaN	NaN	NaN	NaN	NaN	NaN	NaN	NaN	NaN	148.26	NaN	-0.3
NaN	NaN	NaN	NaN	NaN	NaN	104.25	NaN	-0.13	NaN	NaN	NaN	NaN	NaN	NaN	NaN	NaN	NaN	148.36	NaN	-0.14
NaN	NaN	NaN	NaN	NaN	NaN	104.35	NaN	-0.12	NaN	NaN	NaN	NaN	NaN	NaN	NaN	NaN	NaN	148.46	NaN	-0.22
NaN	NaN	NaN	NaN	NaN	NaN	104.45	NaN	-0.52	NaN	NaN	NaN	NaN	NaN	NaN	NaN	NaN	NaN	148.56	NaN	-0.14
NaN	NaN	NaN	NaN	NaN	NaN	104.45	NaN	-0.26	NaN	NaN	NaN	NaN	NaN	NaN	NaN	NaN	NaN	148.66	NaN	-0.14
NaN	NaN	NaN	NaN	NaN	NaN	104.55	NaN	-0.41	NaN	NaN	NaN	NaN	NaN	NaN	NaN	NaN	NaN	148.76	NaN	-0.31
NaN	NaN	NaN	NaN	NaN	NaN	104.65	NaN	-0.65	NaN	NaN	NaN	NaN	NaN	NaN	NaN	NaN	NaN	148.86	NaN	-0.46
NaN	NaN	NaN	NaN	NaN	NaN	104.75	NaN	-0.97	NaN	NaN	NaN	NaN	NaN	NaN	NaN	NaN	NaN	148.96	NaN	-0.33
NaN	NaN	NaN	NaN	NaN	NaN	104.95	NaN	-0.41	NaN	NaN	NaN	NaN	NaN	NaN	NaN	NaN	NaN	149.06	NaN	-0.33
NaN	NaN	NaN	NaN	NaN	NaN	104.95	NaN	-0.63	NaN	NaN	NaN	NaN	NaN	NaN	NaN	NaN	NaN	149.16	NaN	-0.38
NaN	NaN	NaN	NaN	NaN	NaN	105.05	NaN	-0.43	NaN	NaN	NaN	NaN	NaN	NaN	NaN	NaN	NaN	149.28	NaN	-0.35
NaN	NaN	NaN	NaN	NaN	NaN	105.15	NaN	-0.38	NaN	NaN	NaN	NaN	NaN	NaN	NaN	NaN	NaN	149.48	NaN	-0.21
NaN	NaN	NaN	NaN	NaN	NaN	105.25	NaN	-0.24	NaN	NaN	NaN	NaN	NaN	NaN	NaN	NaN	NaN	149.58	NaN	-0.41
NaN	NaN	NaN	NaN	NaN	NaN	105.35	NaN	-0.32	NaN	NaN	NaN	NaN	NaN	NaN	NaN	NaN	NaN	149.68	NaN	-0.13
NaN	NaN	NaN	NaN	NaN	NaN	105.45	NaN	-0.37	NaN	NaN	NaN	NaN	NaN	NaN	NaN	NaN	NaN	149.78	NaN	-0.16
NaN	NaN	NaN	NaN	NaN	NaN	105.45	NaN	-0.35	NaN	NaN	NaN	NaN	NaN	NaN	NaN	NaN	NaN	149.88	NaN	-0.16
NaN	NaN	NaN	NaN	NaN	NaN	105.55	NaN	-0.49	NaN	NaN	NaN	NaN	NaN	NaN	NaN	NaN	NaN	149.98	NaN	-0.25
NaN	NaN	NaN	NaN	NaN	NaN	105.65	NaN	-0.55	NaN	NaN	NaN	NaN	NaN	NaN	NaN	NaN	NaN	150.08	NaN	-0.21
NaN	NaN	NaN	NaN	NaN	NaN	105.75	NaN	-0.59	NaN	NaN	NaN	NaN	NaN	NaN	NaN	NaN	NaN	150.18	NaN	-0.28
NaN	NaN	NaN	NaN	NaN	NaN	105.85	NaN	-1.21	NaN	NaN	NaN	NaN	NaN	NaN	NaN	NaN	NaN	150.28	NaN	-0.28
NaN	NaN	NaN	NaN	NaN	NaN	105.85	NaN	-1.18	NaN	NaN	NaN	NaN	NaN	NaN	NaN	NaN	NaN	150.38	NaN	-0.34
NaN	NaN	NaN	NaN	NaN	NaN	106.14	NaN	-0.82	NaN	NaN	NaN	NaN	NaN	NaN	NaN	NaN	NaN	150.48	NaN	-0.04
NaN	NaN	NaN	NaN	NaN	NaN	106.25	NaN	-0.49	NaN	NaN	NaN	NaN	NaN	NaN	NaN	NaN	NaN	150.58	NaN	0.06
NaN	NaN	NaN	NaN	NaN	NaN	106.25	NaN	-0.77	NaN	NaN	NaN	NaN	NaN	NaN	NaN	NaN	NaN	150.68	NaN	-0.01
NaN	NaN	NaN	NaN	NaN	NaN	106.35	NaN	-0.49	NaN	NaN	NaN	NaN	NaN	NaN	NaN	NaN	NaN	150.78	NaN	0.01
NaN	NaN	NaN	NaN	NaN	NaN	106.45	NaN	-0.09	NaN	NaN	NaN	NaN	NaN	NaN	NaN	NaN	NaN	150.88	NaN	-0.04
NaN	NaN	NaN	NaN	NaN	NaN	106.66	NaN	-0.43	NaN	NaN	NaN	NaN	NaN	NaN	NaN	NaN	NaN	150.98	NaN	0.07
NaN	NaN	NaN	NaN	NaN	NaN	106.76	NaN	-0.62	NaN	NaN	NaN	NaN	NaN	NaN	NaN	NaN	NaN	151.08	NaN	0.02
NaN	NaN	NaN	NaN	NaN	NaN	106.85	NaN	-0.56	NaN	NaN	NaN	NaN	NaN	NaN	NaN	NaN	NaN	151.18	NaN	-0.05
NaN	NaN	NaN	NaN	NaN	NaN	106.85	NaN	-0.27	NaN	NaN	NaN	NaN	NaN	NaN	NaN	NaN	NaN	151.28	NaN	0
NaN	NaN	NaN	NaN	NaN	NaN	106.95	NaN	-0.56	NaN	NaN	NaN	NaN	NaN	NaN	NaN	NaN	NaN	151.38	NaN	-0.11
NaN	NaN	NaN	NaN	NaN	NaN	107.04	NaN	-0.42	NaN	NaN	NaN	NaN	NaN	NaN	NaN	NaN	NaN	151.48	NaN	0.18
NaN	NaN	NaN	NaN	NaN	NaN	107.13	NaN	-0.16	NaN	NaN	NaN	NaN	NaN	NaN	NaN	NaN	NaN	151.58	NaN	0.02
NaN	NaN	NaN	NaN	NaN	NaN	107.21	NaN	-0.36	NaN	NaN	NaN	NaN	NaN	NaN	NaN	NaN	NaN	151.68	NaN	-0.03
NaN	NaN	NaN	NaN	NaN	NaN	107.3	NaN	-0.32	NaN	NaN	NaN	NaN	NaN	NaN	NaN	NaN	NaN	151.78	NaN	-0.16
NaN	NaN	NaN	NaN	NaN	NaN	107.38	NaN	-0.24	NaN	NaN	NaN	NaN	NaN	NaN	NaN	NaN	NaN	151.88	NaN	-0.01
NaN	NaN	NaN	NaN	NaN	NaN	107.47	NaN	-0.25	NaN	NaN	NaN	NaN	NaN	NaN	NaN	NaN	NaN	151.98	NaN	-0.06
NaN	NaN	NaN	NaN	NaN	NaN	107.56	NaN	-0.22	NaN	NaN	NaN	NaN	NaN	NaN	NaN	NaN	NaN	152.08	NaN	-0.15
NaN	NaN	NaN	NaN	NaN	NaN	107.75	NaN	-0.47	NaN	NaN	NaN	NaN	NaN	NaN	NaN	NaN	NaN	152.18	NaN	0.49
NaN	NaN	NaN	NaN	NaN	NaN	107.85	NaN	0.11	NaN	NaN	NaN	NaN	NaN	NaN	NaN	NaN	NaN	152.28	NaN	-0.08
NaN	NaN	NaN	NaN	NaN	NaN	107.95	NaN	-0.12	NaN	NaN	NaN	NaN	NaN	NaN	NaN	NaN	NaN	152.38	NaN	-0.19
NaN	NaN	NaN	NaN	NaN	NaN	108.01	NaN	-0.22	NaN	NaN	NaN	NaN	NaN	NaN	NaN	NaN	NaN	152.48	NaN	-0.16
NaN	NaN	NaN	NaN	NaN	NaN	108.07	NaN	0.16	NaN	NaN	NaN	NaN	NaN	NaN	NaN	NaN	NaN	152.58	NaN	-0.17
NaN	NaN	NaN	NaN	NaN	NaN	108.11	NaN	-0.49	NaN	NaN	NaN	NaN	NaN	NaN	NaN	NaN	NaN	152.68	NaN	-0.23
NaN	NaN	NaN	NaN	NaN	NaN	108.19	NaN	-0.09	NaN	NaN	NaN	NaN	NaN	NaN	NaN	NaN	NaN	152.78	NaN	-0.27
NaN	NaN	NaN	NaN	NaN	NaN	108.3	NaN	-0.23	NaN	NaN	NaN	NaN	NaN	NaN	NaN	NaN	NaN	152.88	NaN	-0.23
NaN	NaN	NaN	NaN	NaN	NaN	108.32	NaN	0.19	NaN	NaN	NaN	NaN	NaN	NaN	NaN	NaN	NaN	152.98	NaN	-0.05
NaN	NaN	NaN	NaN	NaN	NaN	108.4	NaN	-0.2	NaN	NaN	NaN	NaN	NaN	NaN	NaN	NaN	NaN	153.08	NaN	0.22
NaN	NaN	NaN	NaN	NaN	NaN	108.4	NaN	-0.69	NaN	NaN	NaN	NaN	NaN	NaN	NaN	NaN	NaN	153.18	NaN	0.05
NaN	NaN	NaN	NaN	NaN	NaN	108.4	NaN	-0.39	NaN	NaN	NaN	NaN	NaN	NaN	NaN	NaN	NaN	153.28	NaN	0.04
NaN	NaN	NaN	NaN	NaN	NaN	108.5	NaN	-0.03	NaN	NaN	NaN	NaN	NaN	NaN	NaN	NaN	NaN	153.38	NaN	-0.12
NaN	NaN	NaN	NaN	NaN	NaN	108.51	NaN	0.23	NaN	NaN	NaN	NaN	NaN	NaN	NaN	NaN	NaN	153.48	NaN	0.01
NaN	NaN	NaN	NaN	NaN	NaN	108.6	NaN	0.01	NaN	NaN	NaN	NaN	NaN	NaN	NaN	NaN	NaN	153.58	NaN	-0.16
NaN	NaN	NaN	NaN	NaN	NaN	108.61	NaN	0.09	NaN	NaN	NaN	NaN	NaN	NaN	NaN	NaN	NaN	153.68	NaN	-0.23
NaN	NaN	NaN	NaN	NaN	NaN	108.71	NaN	-0.17	NaN	NaN	NaN	NaN	NaN	NaN	NaN	NaN	NaN	153.78	NaN	-0.07
NaN	NaN	NaN	NaN	NaN	NaN	108.81	NaN	-0.07	NaN	NaN	NaN	NaN	NaN	NaN	NaN	NaN	NaN	153.98	NaN	-0.03
NaN	NaN	NaN	NaN	NaN	NaN	108.9	NaN	-0.01	NaN	NaN	NaN	NaN	NaN	NaN	NaN	NaN	NaN	154.08	NaN	-0.09
NaN	NaN	NaN	NaN	NaN	NaN	109	NaN	-0.08	NaN	NaN	NaN	NaN	NaN	NaN	NaN	NaN	NaN	154.18	NaN	0.03
NaN	NaN	NaN	NaN	NaN	NaN	109	NaN	-0.56	NaN	NaN	NaN	NaN	NaN	NaN	NaN	NaN	NaN	154.28	NaN	0.02
NaN	NaN	NaN	NaN	NaN	NaN	109.09	NaN	-0.2	NaN	NaN	NaN	NaN	NaN	NaN	NaN	NaN	NaN	154.38	NaN	0.12
NaN	NaN	NaN	NaN	NaN	NaN	109.2	NaN	-0.02	NaN	NaN	NaN	NaN	NaN	NaN	NaN	NaN	NaN	154.48	NaN	0.32
NaN	NaN	NaN	NaN	NaN	NaN	109.3	NaN	-0.32	NaN	NaN	NaN	NaN	NaN	NaN	NaN	NaN	NaN	154.58	NaN	0.07
NaN	NaN	NaN	NaN	NaN	NaN	109.4	NaN	-0.12	NaN	NaN	NaN	NaN	NaN	NaN	NaN	NaN	NaN	154.68	NaN	0.03
NaN	NaN	NaN	NaN	NaN	NaN	109.5	NaN	0.06	NaN	NaN	NaN	NaN	NaN	NaN	NaN	NaN	NaN	154.78	NaN	0.02
NaN	NaN	NaN	NaN	NaN	NaN	109.68	NaN	-0.05	NaN	NaN	NaN	NaN	NaN	NaN	NaN	NaN	NaN	154.88	NaN	-0.1
NaN	NaN	NaN	NaN	NaN	NaN	109.76	NaN	-0.02	NaN	NaN	NaN	NaN	NaN	NaN	NaN	NaN	NaN	154.98	NaN	0.02
NaN	NaN	NaN	NaN	NaN	NaN	109.84	NaN	-0.06	NaN	NaN	NaN	NaN	NaN	NaN	NaN	NaN	NaN	155.08	NaN	-0.14
NaN	NaN	NaN	NaN	NaN	NaN	109.92	NaN	-0.03	NaN	NaN	NaN	NaN	NaN	NaN	NaN	NaN	NaN	155.18	NaN	-0.27
NaN	NaN	NaN	NaN	NaN	NaN	110.02	NaN	-0.16	NaN	NaN	NaN	NaN	NaN	NaN	NaN	NaN	NaN	155.28	NaN	-0.09
NaN	NaN	NaN	NaN	NaN	NaN	110.02	NaN	-0.41	NaN	NaN	NaN	NaN	NaN	NaN	NaN	NaN	NaN	155.38	NaN	-0.28
NaN	NaN	NaN	NaN	NaN	NaN	110.14	NaN	-0.31	NaN	NaN	NaN	NaN	NaN	NaN	NaN	NaN	NaN	155.48	NaN	-0.18
NaN	NaN	NaN	NaN	NaN	NaN	110.3	NaN	-0.17	NaN	NaN	NaN	NaN	NaN	NaN	NaN	NaN	NaN	155.58	NaN	-0.19
NaN	NaN	NaN	NaN	NaN	NaN	110.48	NaN	-0.28	NaN	NaN	NaN	NaN	NaN	NaN	NaN	NaN	NaN	155.68	NaN	-0.07
NaN	NaN	NaN	NaN	NaN	NaN	110.62	NaN	-0.59	NaN	NaN	NaN	NaN	NaN	NaN	NaN	NaN	NaN	155.78	NaN	0.01
NaN	NaN	NaN	NaN	NaN	NaN	110.71	NaN	-0.42	NaN	NaN	NaN	NaN	NaN	NaN	NaN	NaN	NaN	155.88	NaN	-0.07
NaN	NaN	NaN	NaN	NaN	NaN	110.79	NaN	-0.62	NaN	NaN	NaN	NaN	NaN	NaN	NaN	NaN	NaN	155.98	NaN	-0.09
NaN	NaN	NaN	NaN	NaN	NaN	110.9	NaN	-0.09	NaN	NaN	NaN	NaN	NaN	NaN	NaN	NaN	NaN	156.08	NaN	-0.19
NaN	NaN	NaN	NaN	NaN	NaN	111.07	NaN	-0.36	NaN	NaN	NaN	NaN	NaN	NaN	NaN	NaN	NaN	156.18	NaN	-0.23
NaN	NaN	NaN	NaN	NaN	NaN	111.16	NaN	0.13	NaN	NaN	NaN	NaN	NaN	NaN	NaN	NaN	NaN	156.28	NaN	-0.19
NaN	NaN	NaN	NaN	NaN	NaN	111.16	NaN	0.01	NaN	NaN	NaN	NaN	NaN	NaN	NaN	NaN	NaN	156.38	NaN	-0.31
NaN	NaN	NaN	NaN	NaN	NaN	111.25	NaN	-0.22	NaN	NaN	NaN	NaN	NaN	NaN	NaN	NaN	NaN	156.48	NaN	-0.36
NaN	NaN	NaN	NaN	NaN	NaN	111.25	NaN	0.08	NaN	NaN	NaN	NaN	NaN	NaN	NaN	NaN	NaN	156.58	NaN	-0.19
NaN	NaN	NaN	NaN	NaN	NaN	111.36	NaN	-0.35	NaN	NaN	NaN	NaN	NaN	NaN	NaN	NaN	NaN	156.68	NaN	-0.28
NaN	NaN	NaN	NaN	NaN	NaN	111.36	NaN	0.14	NaN	NaN	NaN	NaN	NaN	NaN	NaN	NaN	NaN	156.78	NaN	-0.09
NaN	NaN	NaN	NaN	NaN	NaN	111.47	NaN	0.01	NaN	NaN	NaN	NaN	NaN	NaN	NaN	NaN	NaN	156.88	NaN	-0.07
NaN	NaN	NaN	NaN	NaN	NaN	111.67	NaN	0.18	NaN	NaN	NaN	NaN	NaN	NaN	NaN	NaN	NaN	156.98	NaN	0.04
NaN	NaN	NaN	NaN	NaN	NaN	111.67	NaN	-0.17	NaN	NaN	NaN	NaN	NaN	NaN	NaN	NaN	NaN	157.08	NaN	0.07
NaN	NaN	NaN	NaN	NaN	NaN	111.76	NaN	-0.01	NaN	NaN	NaN	NaN	NaN	NaN	NaN	NaN	NaN	157.18	NaN	-0.15
NaN	NaN	NaN	NaN	NaN	NaN	111.85	NaN	-0.02	NaN	NaN	NaN	NaN	NaN	NaN	NaN	NaN	NaN	157.28	NaN	-0.08
NaN	NaN	NaN	NaN	NaN	NaN	111.94	NaN	-0.24	NaN	NaN	NaN	NaN	NaN	NaN	NaN	NaN	NaN	157.42	NaN	-0.27
NaN	NaN	NaN	NaN	NaN	NaN	111.94	NaN	-0.05	NaN	NaN	NaN	NaN	NaN	NaN	NaN	NaN	NaN	157.52	NaN	-0.28
NaN	NaN	NaN	NaN	NaN	NaN	112.04	NaN	-0.07	NaN	NaN	NaN	NaN	NaN	NaN	NaN	NaN	NaN	157.62	NaN	-0.45
NaN	NaN	NaN	NaN	NaN	NaN	112.04	NaN	0.01	NaN	NaN	NaN	NaN	NaN	NaN	NaN	NaN	NaN	157.72	NaN	-0.35
NaN	NaN	NaN	NaN	NaN	NaN	112.14	NaN	-0.11	NaN	NaN	NaN	NaN	NaN	NaN	NaN	NaN	NaN	157.82	NaN	-0.07
NaN	NaN	NaN	NaN	NaN	NaN	112.25	NaN	0.2	NaN	NaN	NaN	NaN	NaN	NaN	NaN	NaN	NaN	157.92	NaN	-0.36
NaN	NaN	NaN	NaN	NaN	NaN	112.36	NaN	-0.12	NaN	NaN	NaN	NaN	NaN	NaN	NaN	NaN	NaN	158.02	NaN	-0.21
NaN	NaN	NaN	NaN	NaN	NaN	112.46	NaN	-0.26	NaN	NaN	NaN	NaN	NaN	NaN	NaN	NaN	NaN	158.12	NaN	-0.06
NaN	NaN	NaN	NaN	NaN	NaN	112.46	NaN	-0.09	NaN	NaN	NaN	NaN	NaN	NaN	NaN	NaN	NaN	158.22	NaN	0.39
NaN	NaN	NaN	NaN	NaN	NaN	112.55	NaN	-0.05	NaN	NaN	NaN	NaN	NaN	NaN	NaN	NaN	NaN	158.42	NaN	-0.46
NaN	NaN	NaN	NaN	NaN	NaN	112.55	NaN	-0.15	NaN	NaN	NaN	NaN	NaN	NaN	NaN	NaN	NaN	158.52	NaN	-1.01
NaN	NaN	NaN	NaN	NaN	NaN	112.65	NaN	-0.25	NaN	NaN	NaN	NaN	NaN	NaN	NaN	NaN	NaN	158.62	NaN	0
NaN	NaN	NaN	NaN	NaN	NaN	112.74	NaN	-0.28	NaN	NaN	NaN	NaN	NaN	NaN	NaN	NaN	NaN	158.72	NaN	-0.11
NaN	NaN	NaN	NaN	NaN	NaN	112.84	NaN	-0.23	NaN	NaN	NaN	NaN	NaN	NaN	NaN	NaN	NaN	158.82	NaN	-0.33
NaN	NaN	NaN	NaN	NaN	NaN	112.95	NaN	0.07	NaN	NaN	NaN	NaN	NaN	NaN	NaN	NaN	NaN	158.92	NaN	-0.14
NaN	NaN	NaN	NaN	NaN	NaN	113.06	NaN	-0.23	NaN	NaN	NaN	NaN	NaN	NaN	NaN	NaN	NaN	159.02	NaN	-0.25
NaN	NaN	NaN	NaN	NaN	NaN	113.17	NaN	0.12	NaN	NaN	NaN	NaN	NaN	NaN	NaN	NaN	NaN	159.12	NaN	-0.21
NaN	NaN	NaN	NaN	NaN	NaN	113.27	NaN	0.11	NaN	NaN	NaN	NaN	NaN	NaN	NaN	NaN	NaN	159.22	NaN	0.04
NaN	NaN	NaN	NaN	NaN	NaN	113.37	NaN	0.05	NaN	NaN	NaN	NaN	NaN	NaN	NaN	NaN	NaN	159.32	NaN	-0.09
NaN	NaN	NaN	NaN	NaN	NaN	113.47	NaN	0.03	NaN	NaN	NaN	NaN	NaN	NaN	NaN	NaN	NaN	159.42	NaN	0.04
NaN	NaN	NaN	NaN	NaN	NaN	113.56	NaN	-0.3	NaN	NaN	NaN	NaN	NaN	NaN	NaN	NaN	NaN	159.52	NaN	0
NaN	NaN	NaN	NaN	NaN	NaN	113.65	NaN	-0.33	NaN	NaN	NaN	NaN	NaN	NaN	NaN	NaN	NaN	159.62	NaN	-0.12
NaN	NaN	NaN	NaN	NaN	NaN	113.75	NaN	-0.41	NaN	NaN	NaN	NaN	NaN	NaN	NaN	NaN	NaN	159.82	NaN	0.03
NaN	NaN	NaN	NaN	NaN	NaN	113.84	NaN	-0.38	NaN	NaN	NaN	NaN	NaN	NaN	NaN	NaN	NaN	159.92	NaN	-0.12
NaN	NaN	NaN	NaN	NaN	NaN	113.94	NaN	-0.43	NaN	NaN	NaN	NaN	NaN	NaN	NaN	NaN	NaN	160.02	NaN	-0.2
NaN	NaN	NaN	NaN	NaN	NaN	114.04	NaN	-0.55	NaN	NaN	NaN	NaN	NaN	NaN	NaN	NaN	NaN	160.12	NaN	-0.17
NaN	NaN	NaN	NaN	NaN	NaN	114.15	NaN	-0.63	NaN	NaN	NaN	NaN	NaN	NaN	NaN	NaN	NaN	160.22	NaN	-0.04
NaN	NaN	NaN	NaN	NaN	NaN	114.25	NaN	-0.57	NaN	NaN	NaN	NaN	NaN	NaN	NaN	NaN	NaN	160.32	NaN	0.07
NaN	NaN	NaN	NaN	NaN	NaN	114.35	NaN	-0.31	NaN	NaN	NaN	NaN	NaN	NaN	NaN	NaN	NaN	160.42	NaN	-0.03
NaN	NaN	NaN	NaN	NaN	NaN	114.45	NaN	-0.4	NaN	NaN	NaN	NaN	NaN	NaN	NaN	NaN	NaN	160.52	NaN	-0.16
NaN	NaN	NaN	NaN	NaN	NaN	114.56	NaN	-0.43	NaN	NaN	NaN	NaN	NaN	NaN	NaN	NaN	NaN	160.62	NaN	0
NaN	NaN	NaN	NaN	NaN	NaN	114.66	NaN	-0.42	NaN	NaN	NaN	NaN	NaN	NaN	NaN	NaN	NaN	160.72	NaN	-0.22
NaN	NaN	NaN	NaN	NaN	NaN	114.76	NaN	-0.39	NaN	NaN	NaN	NaN	NaN	NaN	NaN	NaN	NaN	160.82	NaN	-0.26
NaN	NaN	NaN	NaN	NaN	NaN	114.86	NaN	0.14	NaN	NaN	NaN	NaN	NaN	NaN	NaN	NaN	NaN	160.92	NaN	-0.46
NaN	NaN	NaN	NaN	NaN	NaN	114.86	NaN	-0.35	NaN	NaN	NaN	NaN	NaN	NaN	NaN	NaN	NaN	161.12	NaN	-0.63
NaN	NaN	NaN	NaN	NaN	NaN	114.96	NaN	0.19	NaN	NaN	NaN	NaN	NaN	NaN	NaN	NaN	NaN	161.22	NaN	-0.58
NaN	NaN	NaN	NaN	NaN	NaN	115.05	NaN	-0.4	NaN	NaN	NaN	NaN	NaN	NaN	NaN	NaN	NaN	161.32	NaN	-0.49
NaN	NaN	NaN	NaN	NaN	NaN	115.15	NaN	-0.24	NaN	NaN	NaN	NaN	NaN	NaN	NaN	NaN	NaN	161.42	NaN	-0.47
NaN	NaN	NaN	NaN	NaN	NaN	115.25	NaN	-0.49	NaN	NaN	NaN	NaN	NaN	NaN	NaN	NaN	NaN	161.52	NaN	-0.26
NaN	NaN	NaN	NaN	NaN	NaN	115.35	NaN	-0.59	NaN	NaN	NaN	NaN	NaN	NaN	NaN	NaN	NaN	161.62	NaN	-0.11
NaN	NaN	NaN	NaN	NaN	NaN	115.45	NaN	-0.23	NaN	NaN	NaN	NaN	NaN	NaN	NaN	NaN	NaN	161.72	NaN	-0.22
NaN	NaN	NaN	NaN	NaN	NaN	115.45	NaN	-0.4	NaN	NaN	NaN	NaN	NaN	NaN	NaN	NaN	NaN	161.82	NaN	-0.12
NaN	NaN	NaN	NaN	NaN	NaN	115.55	NaN	-0.07	NaN	NaN	NaN	NaN	NaN	NaN	NaN	NaN	NaN	161.92	NaN	-0.15
NaN	NaN	NaN	NaN	NaN	NaN	115.55	NaN	-0.3	NaN	NaN	NaN	NaN	NaN	NaN	NaN	NaN	NaN	162.02	NaN	-0.15
NaN	NaN	NaN	NaN	NaN	NaN	115.66	NaN	-0.1	NaN	NaN	NaN	NaN	NaN	NaN	NaN	NaN	NaN	162.12	NaN	-0.1
NaN	NaN	NaN	NaN	NaN	NaN	115.66	NaN	-0.62	NaN	NaN	NaN	NaN	NaN	NaN	NaN	NaN	NaN	162.32	NaN	-0.37
NaN	NaN	NaN	NaN	NaN	NaN	115.76	NaN	-0.61	NaN	NaN	NaN	NaN	NaN	NaN	NaN	NaN	NaN	162.42	NaN	-0.6
NaN	NaN	NaN	NaN	NaN	NaN	115.76	NaN	-0.17	NaN	NaN	NaN	NaN	NaN	NaN	NaN	NaN	NaN	162.52	NaN	-0.5
NaN	NaN	NaN	NaN	NaN	NaN	115.85	NaN	-0.38	NaN	NaN	NaN	NaN	NaN	NaN	NaN	NaN	NaN	162.62	NaN	-0.56
NaN	NaN	NaN	NaN	NaN	NaN	115.95	NaN	-0.47	NaN	NaN	NaN	NaN	NaN	NaN	NaN	NaN	NaN	162.72	NaN	-0.12
NaN	NaN	NaN	NaN	NaN	NaN	116.04	NaN	-0.38	NaN	NaN	NaN	NaN	NaN	NaN	NaN	NaN	NaN	162.92	NaN	-0.22
NaN	NaN	NaN	NaN	NaN	NaN	116.14	NaN	-0.24	NaN	NaN	NaN	NaN	NaN	NaN	NaN	NaN	NaN	163.02	NaN	-0.09
NaN	NaN	NaN	NaN	NaN	NaN	116.24	NaN	-0.32	NaN	NaN	NaN	NaN	NaN	NaN	NaN	NaN	NaN	163.12	NaN	-0.45
NaN	NaN	NaN	NaN	NaN	NaN	116.35	NaN	-0.57	NaN	NaN	NaN	NaN	NaN	NaN	NaN	NaN	NaN	163.22	NaN	-0.07
NaN	NaN	NaN	NaN	NaN	NaN	116.45	NaN	-0.66	NaN	NaN	NaN	NaN	NaN	NaN	NaN	NaN	NaN	163.32	NaN	-0.13
NaN	NaN	NaN	NaN	NaN	NaN	116.45	NaN	-0.69	NaN	NaN	NaN	NaN	NaN	NaN	NaN	NaN	NaN	163.42	NaN	-0.21
NaN	NaN	NaN	NaN	NaN	NaN	116.55	NaN	-0.77	NaN	NaN	NaN	NaN	NaN	NaN	NaN	NaN	NaN	163.52	NaN	-0.16
NaN	NaN	NaN	NaN	NaN	NaN	116.55	NaN	-0.5	NaN	NaN	NaN	NaN	NaN	NaN	NaN	NaN	NaN	163.62	NaN	-0.33
NaN	NaN	NaN	NaN	NaN	NaN	116.64	NaN	-0.73	NaN	NaN	NaN	NaN	NaN	NaN	NaN	NaN	NaN	163.72	NaN	-0.22
NaN	NaN	NaN	NaN	NaN	NaN	116.64	NaN	-0.56	NaN	NaN	NaN	NaN	NaN	NaN	NaN	NaN	NaN	163.82	NaN	-0.29
NaN	NaN	NaN	NaN	NaN	NaN	116.73	NaN	-0.76	NaN	NaN	NaN	NaN	NaN	NaN	NaN	NaN	NaN	163.92	NaN	-0.31
NaN	NaN	NaN	NaN	NaN	NaN	116.81	NaN	-0.73	NaN	NaN	NaN	NaN	NaN	NaN	NaN	NaN	NaN	164.02	NaN	-0.57
NaN	NaN	NaN	NaN	NaN	NaN	116.89	NaN	-0.8	NaN	NaN	NaN	NaN	NaN	NaN	NaN	NaN	NaN	164.12	NaN	-0.67
NaN	NaN	NaN	NaN	NaN	NaN	116.98	NaN	-0.53	NaN	NaN	NaN	NaN	NaN	NaN	NaN	NaN	NaN	164.22	NaN	-0.62
NaN	NaN	NaN	NaN	NaN	NaN	117.08	NaN	-0.47	NaN	NaN	NaN	NaN	NaN	NaN	NaN	NaN	NaN	164.32	NaN	-0.27
NaN	NaN	NaN	NaN	NaN	NaN	117.22	NaN	-0.37	NaN	NaN	NaN	NaN	NaN	NaN	NaN	NaN	NaN	164.5	NaN	-0.37
NaN	NaN	NaN	NaN	NaN	NaN	117.38	NaN	-0.36	NaN	NaN	NaN	NaN	NaN	NaN	NaN	NaN	NaN	164.6	NaN	-0.44
NaN	NaN	NaN	NaN	NaN	NaN	117.57	NaN	-0.3	NaN	NaN	NaN	NaN	NaN	NaN	NaN	NaN	NaN	164.7	NaN	-0.38
NaN	NaN	NaN	NaN	NaN	NaN	117.71	NaN	-0.11	NaN	NaN	NaN	NaN	NaN	NaN	NaN	NaN	NaN	164.8	NaN	-0.26
NaN	NaN	NaN	NaN	NaN	NaN	117.81	NaN	-0.31	NaN	NaN	NaN	NaN	NaN	NaN	NaN	NaN	NaN	164.9	NaN	-0.23
NaN	NaN	NaN	NaN	NaN	NaN	117.89	NaN	-0.19	NaN	NaN	NaN	NaN	NaN	NaN	NaN	NaN	NaN	165	NaN	-0.07
NaN	NaN	NaN	NaN	NaN	NaN	117.96	NaN	-0.23	NaN	NaN	NaN	NaN	NaN	NaN	NaN	NaN	NaN	165.1	NaN	0.07
NaN	NaN	NaN	NaN	NaN	NaN	118.01	NaN	-0.33	NaN	NaN	NaN	NaN	NaN	NaN	NaN	NaN	NaN	165.2	NaN	-0.93
NaN	NaN	NaN	NaN	NaN	NaN	118.05	NaN	-0.14	NaN	NaN	NaN	NaN	NaN	NaN	NaN	NaN	NaN	165.3	NaN	-0.7
NaN	NaN	NaN	NaN	NaN	NaN	118.06	NaN	-0.11	NaN	NaN	NaN	NaN	NaN	NaN	NaN	NaN	NaN	165.4	NaN	-0.48
NaN	NaN	NaN	NaN	NaN	NaN	118.15	NaN	-0.01	NaN	NaN	NaN	NaN	NaN	NaN	NaN	NaN	NaN	165.5	NaN	0.01
NaN	NaN	NaN	NaN	NaN	NaN	118.22	NaN	-0.01	NaN	NaN	NaN	NaN	NaN	NaN	NaN	NaN	NaN	165.6	NaN	0.05
NaN	NaN	NaN	NaN	NaN	NaN	118.25	NaN	-0.31	NaN	NaN	NaN	NaN	NaN	NaN	NaN	NaN	NaN	165.7	NaN	-0.17
NaN	NaN	NaN	NaN	NaN	NaN	118.32	NaN	-0.16	NaN	NaN	NaN	NaN	NaN	NaN	NaN	NaN	NaN	165.8	NaN	-0.26
NaN	NaN	NaN	NaN	NaN	NaN	118.32	NaN	-0.37	NaN	NaN	NaN	NaN	NaN	NaN	NaN	NaN	NaN	165.9	NaN	-0.23
NaN	NaN	NaN	NaN	NaN	NaN	118.35	NaN	-0.39	NaN	NaN	NaN	NaN	NaN	NaN	NaN	NaN	NaN	166	NaN	-0.28
NaN	NaN	NaN	NaN	NaN	NaN	118.35	NaN	-0.18	NaN	NaN	NaN	NaN	NaN	NaN	NaN	NaN	NaN	166.1	NaN	-0.36
NaN	NaN	NaN	NaN	NaN	NaN	118.41	NaN	-0.07	NaN	NaN	NaN	NaN	NaN	NaN	NaN	NaN	NaN	166.2	NaN	-0.43
NaN	NaN	NaN	NaN	NaN	NaN	118.45	NaN	-0.2	NaN	NaN	NaN	NaN	NaN	NaN	NaN	NaN	NaN	166.3	NaN	-0.22
NaN	NaN	NaN	NaN	NaN	NaN	118.55	NaN	-0.2	NaN	NaN	NaN	NaN	NaN	NaN	NaN	NaN	NaN	166.4	NaN	-0.17
NaN	NaN	NaN	NaN	NaN	NaN	118.65	NaN	-0.32	NaN	NaN	NaN	NaN	NaN	NaN	NaN	NaN	NaN	166.5	NaN	-0.34
NaN	NaN	NaN	NaN	NaN	NaN	118.75	NaN	-0.37	NaN	NaN	NaN	NaN	NaN	NaN	NaN	NaN	NaN	166.6	NaN	0.16
NaN	NaN	NaN	NaN	NaN	NaN	118.85	NaN	-0.32	NaN	NaN	NaN	NaN	NaN	NaN	NaN	NaN	NaN	166.7	NaN	-0.13
NaN	NaN	NaN	NaN	NaN	NaN	118.95	NaN	0.02	NaN	NaN	NaN	NaN	NaN	NaN	NaN	NaN	NaN	166.8	NaN	-0.06
NaN	NaN	NaN	NaN	NaN	NaN	119.05	NaN	0	NaN	NaN	NaN	NaN	NaN	NaN	NaN	NaN	NaN	166.9	NaN	-0.1
NaN	NaN	NaN	NaN	NaN	NaN	119.15	NaN	-0.01	NaN	NaN	NaN	NaN	NaN	NaN	NaN	NaN	NaN	167	NaN	-0.28
NaN	NaN	NaN	NaN	NaN	NaN	119.35	NaN	-0.31	NaN	NaN	NaN	NaN	NaN	NaN	NaN	NaN	NaN	167.12	NaN	-0.26
NaN	NaN	NaN	NaN	NaN	NaN	119.45	NaN	-0.21	NaN	NaN	NaN	NaN	NaN	NaN	NaN	NaN	NaN	167.22	NaN	-0.36
NaN	NaN	NaN	NaN	NaN	NaN	119.55	NaN	-0.11	NaN	NaN	NaN	NaN	NaN	NaN	NaN	NaN	NaN	167.32	NaN	-0.4
NaN	NaN	NaN	NaN	NaN	NaN	119.65	NaN	-0.18	NaN	NaN	NaN	NaN	NaN	NaN	NaN	NaN	NaN	167.42	NaN	-0.35
NaN	NaN	NaN	NaN	NaN	NaN	119.75	NaN	-0.32	NaN	NaN	NaN	NaN	NaN	NaN	NaN	NaN	NaN	167.52	NaN	-0.3
NaN	NaN	NaN	NaN	NaN	NaN	119.85	NaN	-0.23	NaN	NaN	NaN	NaN	NaN	NaN	NaN	NaN	NaN	167.62	NaN	-0.19
NaN	NaN	NaN	NaN	NaN	NaN	119.85	NaN	-0.33	NaN	NaN	NaN	NaN	NaN	NaN	NaN	NaN	NaN	167.72	NaN	-0.17
NaN	NaN	NaN	NaN	NaN	NaN	119.95	NaN	-0.2	NaN	NaN	NaN	NaN	NaN	NaN	NaN	NaN	NaN	167.82	NaN	0.03
NaN	NaN	NaN	NaN	NaN	NaN	120.1	NaN	-0.23	NaN	NaN	NaN	NaN	NaN	NaN	NaN	NaN	NaN	167.92	NaN	0.09
NaN	NaN	NaN	NaN	NaN	NaN	120.18	NaN	-0.16	NaN	NaN	NaN	NaN	NaN	NaN	NaN	NaN	NaN	168.02	NaN	-0.02
NaN	NaN	NaN	NaN	NaN	NaN	120.26	NaN	-0.2	NaN	NaN	NaN	NaN	NaN	NaN	NaN	NaN	NaN	168.12	NaN	0.05
NaN	NaN	NaN	NaN	NaN	NaN	120.35	NaN	-0.2	NaN	NaN	NaN	NaN	NaN	NaN	NaN	NaN	NaN	168.22	NaN	-0.31
NaN	NaN	NaN	NaN	NaN	NaN	120.35	NaN	-0.2	NaN	NaN	NaN	NaN	NaN	NaN	NaN	NaN	NaN	168.33	NaN	-0.19
NaN	NaN	NaN	NaN	NaN	NaN	120.44	NaN	-0.39	NaN	NaN	NaN	NaN	NaN	NaN	NaN	NaN	NaN	168.43	NaN	-0.12
NaN	NaN	NaN	NaN	NaN	NaN	120.44	NaN	-0.48	NaN	NaN	NaN	NaN	NaN	NaN	NaN	NaN	NaN	168.53	NaN	-0.17
NaN	NaN	NaN	NaN	NaN	NaN	120.54	NaN	-0.42	NaN	NaN	NaN	NaN	NaN	NaN	NaN	NaN	NaN	168.63	NaN	-0.05
NaN	NaN	NaN	NaN	NaN	NaN	120.64	NaN	-0.38	NaN	NaN	NaN	NaN	NaN	NaN	NaN	NaN	NaN	168.73	NaN	-0.17
NaN	NaN	NaN	NaN	NaN	NaN	120.75	NaN	-0.52	NaN	NaN	NaN	NaN	NaN	NaN	NaN	NaN	NaN	168.83	NaN	-0.29
NaN	NaN	NaN	NaN	NaN	NaN	120.75	NaN	-0.37	NaN	NaN	NaN	NaN	NaN	NaN	NaN	NaN	NaN	168.93	NaN	-0.2
NaN	NaN	NaN	NaN	NaN	NaN	120.85	NaN	-0.56	NaN	NaN	NaN	NaN	NaN	NaN	NaN	NaN	NaN	169.03	NaN	-0.2
NaN	NaN	NaN	NaN	NaN	NaN	120.95	NaN	-0.48	NaN	NaN	NaN	NaN	NaN	NaN	NaN	NaN	NaN	169.13	NaN	-0.32
NaN	NaN	NaN	NaN	NaN	NaN	121.05	NaN	-0.45	NaN	NaN	NaN	NaN	NaN	NaN	NaN	NaN	NaN	169.23	NaN	-0.18
NaN	NaN	NaN	NaN	NaN	NaN	121.15	NaN	-0.49	NaN	NaN	NaN	NaN	NaN	NaN	NaN	NaN	NaN	169.33	NaN	-0.19
NaN	NaN	NaN	NaN	NaN	NaN	121.15	NaN	-0.64	NaN	NaN	NaN	NaN	NaN	NaN	NaN	NaN	NaN	169.43	NaN	-0.22
NaN	NaN	NaN	NaN	NaN	NaN	121.25	NaN	-0.41	NaN	NaN	NaN	NaN	NaN	NaN	NaN	NaN	NaN	169.53	NaN	-0.26
NaN	NaN	NaN	NaN	NaN	NaN	121.35	NaN	-0.27	NaN	NaN	NaN	NaN	NaN	NaN	NaN	NaN	NaN	169.63	NaN	-0.35
NaN	NaN	NaN	NaN	NaN	NaN	121.45	NaN	-0.18	NaN	NaN	NaN	NaN	NaN	NaN	NaN	NaN	NaN	169.73	NaN	-0.22
NaN	NaN	NaN	NaN	NaN	NaN	121.55	NaN	-0.42	NaN	NaN	NaN	NaN	NaN	NaN	NaN	NaN	NaN	169.85	NaN	0.02
NaN	NaN	NaN	NaN	NaN	NaN	121.65	NaN	-0.59	NaN	NaN	NaN	NaN	NaN	NaN	NaN	NaN	NaN	169.95	NaN	-0.27
NaN	NaN	NaN	NaN	NaN	NaN	121.75	NaN	-0.55	NaN	NaN	NaN	NaN	NaN	NaN	NaN	NaN	NaN	170.05	NaN	-0.27
NaN	NaN	NaN	NaN	NaN	NaN	121.85	NaN	-0.48	NaN	NaN	NaN	NaN	NaN	NaN	NaN	NaN	NaN	170.15	NaN	-0.21
NaN	NaN	NaN	NaN	NaN	NaN	121.95	NaN	-0.46	NaN	NaN	NaN	NaN	NaN	NaN	NaN	NaN	NaN	170.25	NaN	-0.13
NaN	NaN	NaN	NaN	NaN	NaN	122.05	NaN	-0.54	NaN	NaN	NaN	NaN	NaN	NaN	NaN	NaN	NaN	170.35	NaN	-0.06
NaN	NaN	NaN	NaN	NaN	NaN	122.14	NaN	-0.46	NaN	NaN	NaN	NaN	NaN	NaN	NaN	NaN	NaN	170.45	NaN	-0.14
NaN	NaN	NaN	NaN	NaN	NaN	122.24	NaN	-0.37	NaN	NaN	NaN	NaN	NaN	NaN	NaN	NaN	NaN	170.55	NaN	-0.17
NaN	NaN	NaN	NaN	NaN	NaN	122.34	NaN	-0.46	NaN	NaN	NaN	NaN	NaN	NaN	NaN	NaN	NaN	170.65	NaN	-0.23
NaN	NaN	NaN	NaN	NaN	NaN	122.44	NaN	-0.66	NaN	NaN	NaN	NaN	NaN	NaN	NaN	NaN	NaN	170.75	NaN	-0.26
NaN	NaN	NaN	NaN	NaN	NaN	122.55	NaN	-0.54	NaN	NaN	NaN	NaN	NaN	NaN	NaN	NaN	NaN	170.85	NaN	-0.18
NaN	NaN	NaN	NaN	NaN	NaN	122.65	NaN	-0.53	NaN	NaN	NaN	NaN	NaN	NaN	NaN	NaN	NaN	170.95	NaN	-0.14
NaN	NaN	NaN	NaN	NaN	NaN	122.75	NaN	-0.31	NaN	NaN	NaN	NaN	NaN	NaN	NaN	NaN	NaN	171.05	NaN	-0.11
NaN	NaN	NaN	NaN	NaN	NaN	122.85	NaN	-0.14	NaN	NaN	NaN	NaN	NaN	NaN	NaN	NaN	NaN	171.15	NaN	-0.18
NaN	NaN	NaN	NaN	NaN	NaN	122.95	NaN	-0.31	NaN	NaN	NaN	NaN	NaN	NaN	NaN	NaN	NaN	171.25	NaN	-0.15
NaN	NaN	NaN	NaN	NaN	NaN	123.05	NaN	-0.44	NaN	NaN	NaN	NaN	NaN	NaN	NaN	NaN	NaN	171.35	NaN	-0.26
NaN	NaN	NaN	NaN	NaN	NaN	123.15	NaN	-0.8	NaN	NaN	NaN	NaN	NaN	NaN	NaN	NaN	NaN	171.45	NaN	-0.08
NaN	NaN	NaN	NaN	NaN	NaN	123.25	NaN	-0.22	NaN	NaN	NaN	NaN	NaN	NaN	NaN	NaN	NaN	171.55	NaN	-0.16
NaN	NaN	NaN	NaN	NaN	NaN	123.45	NaN	0.02	NaN	NaN	NaN	NaN	NaN	NaN	NaN	NaN	NaN	171.59	NaN	-0.21
NaN	NaN	NaN	NaN	NaN	NaN	123.55	NaN	-0.1	NaN	NaN	NaN	NaN	NaN	NaN	NaN	NaN	NaN	171.69	NaN	-0.22
NaN	NaN	NaN	NaN	NaN	NaN	123.65	NaN	-0.2	NaN	NaN	NaN	NaN	NaN	NaN	NaN	NaN	NaN	171.79	NaN	-0.22
NaN	NaN	NaN	NaN	NaN	NaN	123.75	NaN	0.17	NaN	NaN	NaN	NaN	NaN	NaN	NaN	NaN	NaN	171.99	NaN	-0.32
NaN	NaN	NaN	NaN	NaN	NaN	123.85	NaN	0.11	NaN	NaN	NaN	NaN	NaN	NaN	NaN	NaN	NaN	172.09	NaN	-0.56
NaN	NaN	NaN	NaN	NaN	NaN	123.95	NaN	0.18	NaN	NaN	NaN	NaN	NaN	NaN	NaN	NaN	NaN	172.19	NaN	-0.31
NaN	NaN	NaN	NaN	NaN	NaN	124.05	NaN	0.16	NaN	NaN	NaN	NaN	NaN	NaN	NaN	NaN	NaN	172.29	NaN	-0.14
NaN	NaN	NaN	NaN	NaN	NaN	124.15	NaN	0.09	NaN	NaN	NaN	NaN	NaN	NaN	NaN	NaN	NaN	172.39	NaN	-0.33
NaN	NaN	NaN	NaN	NaN	NaN	124.25	NaN	0.18	NaN	NaN	NaN	NaN	NaN	NaN	NaN	NaN	NaN	172.49	NaN	-0.3
NaN	NaN	NaN	NaN	NaN	NaN	124.35	NaN	0.13	NaN	NaN	NaN	NaN	NaN	NaN	NaN	NaN	NaN	172.59	NaN	-0.28
NaN	NaN	NaN	NaN	NaN	NaN	124.45	NaN	-0.14	NaN	NaN	NaN	NaN	NaN	NaN	NaN	NaN	NaN	172.69	NaN	-0.24
NaN	NaN	NaN	NaN	NaN	NaN	124.55	NaN	-0.09	NaN	NaN	NaN	NaN	NaN	NaN	NaN	NaN	NaN	172.79	NaN	-0.25
NaN	NaN	NaN	NaN	NaN	NaN	124.65	NaN	0.01	NaN	NaN	NaN	NaN	NaN	NaN	NaN	NaN	NaN	172.89	NaN	-0.14
NaN	NaN	NaN	NaN	NaN	NaN	124.65	NaN	-0.4	NaN	NaN	NaN	NaN	NaN	NaN	NaN	NaN	NaN	172.99	NaN	-0.19
NaN	NaN	NaN	NaN	NaN	NaN	124.75	NaN	-0.04	NaN	NaN	NaN	NaN	NaN	NaN	NaN	NaN	NaN	173.09	NaN	-0.32
NaN	NaN	NaN	NaN	NaN	NaN	124.85	NaN	0.19	NaN	NaN	NaN	NaN	NaN	NaN	NaN	NaN	NaN	173.19	NaN	-0.36
NaN	NaN	NaN	NaN	NaN	NaN	124.85	NaN	-0.27	NaN	NaN	NaN	NaN	NaN	NaN	NaN	NaN	NaN	173.29	NaN	-0.39
NaN	NaN	NaN	NaN	NaN	NaN	124.95	NaN	-0.25	NaN	NaN	NaN	NaN	NaN	NaN	NaN	NaN	NaN	173.39	NaN	-0.45
NaN	NaN	NaN	NaN	NaN	NaN	124.95	NaN	-0.18	NaN	NaN	NaN	NaN	NaN	NaN	NaN	NaN	NaN	173.49	NaN	-0.31
NaN	NaN	NaN	NaN	NaN	NaN	125.05	NaN	-0.11	NaN	NaN	NaN	NaN	NaN	NaN	NaN	NaN	NaN	173.59	NaN	-0.08
NaN	NaN	NaN	NaN	NaN	NaN	125.15	NaN	-0.27	NaN	NaN	NaN	NaN	NaN	NaN	NaN	NaN	NaN	173.69	NaN	-0.15
NaN	NaN	NaN	NaN	NaN	NaN	125.25	NaN	-0.25	NaN	NaN	NaN	NaN	NaN	NaN	NaN	NaN	NaN	173.79	NaN	-0.08
NaN	NaN	NaN	NaN	NaN	NaN	125.35	NaN	-0.29	NaN	NaN	NaN	NaN	NaN	NaN	NaN	NaN	NaN	173.89	NaN	-0.32
NaN	NaN	NaN	NaN	NaN	NaN	125.45	NaN	-0.33	NaN	NaN	NaN	NaN	NaN	NaN	NaN	NaN	NaN	173.99	NaN	-0.26
NaN	NaN	NaN	NaN	NaN	NaN	125.45	NaN	-0.35	NaN	NaN	NaN	NaN	NaN	NaN	NaN	NaN	NaN	174.19	NaN	-0.14
NaN	NaN	NaN	NaN	NaN	NaN	125.55	NaN	-0.29	NaN	NaN	NaN	NaN	NaN	NaN	NaN	NaN	NaN	174.39	NaN	-0.24
NaN	NaN	NaN	NaN	NaN	NaN	125.55	NaN	-0.33	NaN	NaN	NaN	NaN	NaN	NaN	NaN	NaN	NaN	174.49	NaN	-0.27
NaN	NaN	NaN	NaN	NaN	NaN	125.65	NaN	-0.26	NaN	NaN	NaN	NaN	NaN	NaN	NaN	NaN	NaN	174.79	NaN	-0.35
NaN	NaN	NaN	NaN	NaN	NaN	125.65	NaN	-0.44	NaN	NaN	NaN	NaN	NaN	NaN	NaN	NaN	NaN	174.89	NaN	-0.49
NaN	NaN	NaN	NaN	NaN	NaN	125.75	NaN	-0.4	NaN	NaN	NaN	NaN	NaN	NaN	NaN	NaN	NaN	174.99	NaN	-0.17
NaN	NaN	NaN	NaN	NaN	NaN	125.85	NaN	-0.48	NaN	NaN	NaN	NaN	NaN	NaN	NaN	NaN	NaN	175.09	NaN	-0.3
NaN	NaN	NaN	NaN	NaN	NaN	125.85	NaN	-0.59	NaN	NaN	NaN	NaN	NaN	NaN	NaN	NaN	NaN	175.19	NaN	-0.9
NaN	NaN	NaN	NaN	NaN	NaN	125.95	NaN	-0.78	NaN	NaN	NaN	NaN	NaN	NaN	NaN	NaN	NaN	175.39	NaN	-0.22
NaN	NaN	NaN	NaN	NaN	NaN	125.95	NaN	-0.58	NaN	NaN	NaN	NaN	NaN	NaN	NaN	NaN	NaN	175.59	NaN	-0.25
NaN	NaN	NaN	NaN	NaN	NaN	126.05	NaN	-0.25	NaN	NaN	NaN	NaN	NaN	NaN	NaN	NaN	NaN	175.69	NaN	-0.39
NaN	NaN	NaN	NaN	NaN	NaN	126.15	NaN	-0.95	NaN	NaN	NaN	NaN	NaN	NaN	NaN	NaN	NaN	175.79	NaN	-0.39
NaN	NaN	NaN	NaN	NaN	NaN	126.15	NaN	-0.49	NaN	NaN	NaN	NaN	NaN	NaN	NaN	NaN	NaN	175.89	NaN	-0.09
NaN	NaN	NaN	NaN	NaN	NaN	126.25	NaN	-0.38	NaN	NaN	NaN	NaN	NaN	NaN	NaN	NaN	NaN	175.99	NaN	-0.21
NaN	NaN	NaN	NaN	NaN	NaN	126.25	NaN	-0.18	NaN	NaN	NaN	NaN	NaN	NaN	NaN	NaN	NaN	176.09	NaN	-0.11
NaN	NaN	NaN	NaN	NaN	NaN	126.25	NaN	-0.27	NaN	NaN	NaN	NaN	NaN	NaN	NaN	NaN	NaN	176.19	NaN	-0.16
NaN	NaN	NaN	NaN	NaN	NaN	126.35	NaN	-0.04	NaN	NaN	NaN	NaN	NaN	NaN	NaN	NaN	NaN	176.29	NaN	-0.19
NaN	NaN	NaN	NaN	NaN	NaN	126.35	NaN	-0.47	NaN	NaN	NaN	NaN	NaN	NaN	NaN	NaN	NaN	176.39	NaN	0.01
NaN	NaN	NaN	NaN	NaN	NaN	126.35	NaN	-0.25	NaN	NaN	NaN	NaN	NaN	NaN	NaN	NaN	NaN	176.49	NaN	-0.47
NaN	NaN	NaN	NaN	NaN	NaN	126.35	NaN	-0.51	NaN	NaN	NaN	NaN	NaN	NaN	NaN	NaN	NaN	176.59	NaN	-0.1
NaN	NaN	NaN	NaN	NaN	NaN	126.45	NaN	-0.23	NaN	NaN	NaN	NaN	NaN	NaN	NaN	NaN	NaN	176.67	NaN	-0.26
NaN	NaN	NaN	NaN	NaN	NaN	126.55	NaN	-0.23	NaN	NaN	NaN	NaN	NaN	NaN	NaN	NaN	NaN	176.77	NaN	-0.32
NaN	NaN	NaN	NaN	NaN	NaN	126.55	NaN	0	NaN	NaN	NaN	NaN	NaN	NaN	NaN	NaN	NaN	176.87	NaN	-0.28
NaN	NaN	NaN	NaN	NaN	NaN	126.65	NaN	-0.11	NaN	NaN	NaN	NaN	NaN	NaN	NaN	NaN	NaN	176.97	NaN	-0.24
NaN	NaN	NaN	NaN	NaN	NaN	126.75	NaN	-0.06	NaN	NaN	NaN	NaN	NaN	NaN	NaN	NaN	NaN	177.07	NaN	-0.11
NaN	NaN	NaN	NaN	NaN	NaN	126.85	NaN	-0.1	NaN	NaN	NaN	NaN	NaN	NaN	NaN	NaN	NaN	177.17	NaN	-0.2
NaN	NaN	NaN	NaN	NaN	NaN	127.05	NaN	-0.18	NaN	NaN	NaN	NaN	NaN	NaN	NaN	NaN	NaN	177.27	NaN	-0.13
NaN	NaN	NaN	NaN	NaN	NaN	127.16	NaN	-0.05	NaN	NaN	NaN	NaN	NaN	NaN	NaN	NaN	NaN	177.37	NaN	0.03
NaN	NaN	NaN	NaN	NaN	NaN	127.16	NaN	-0.37	NaN	NaN	NaN	NaN	NaN	NaN	NaN	NaN	NaN	177.57	NaN	-0.01
NaN	NaN	NaN	NaN	NaN	NaN	127.36	NaN	-0.14	NaN	NaN	NaN	NaN	NaN	NaN	NaN	NaN	NaN	177.67	NaN	0.01
NaN	NaN	NaN	NaN	NaN	NaN	127.46	NaN	-0.05	NaN	NaN	NaN	NaN	NaN	NaN	NaN	NaN	NaN	177.77	NaN	-0.03
NaN	NaN	NaN	NaN	NaN	NaN	127.46	NaN	-0.13	NaN	NaN	NaN	NaN	NaN	NaN	NaN	NaN	NaN	177.87	NaN	0.13
NaN	NaN	NaN	NaN	NaN	NaN	127.55	NaN	-0.02	NaN	NaN	NaN	NaN	NaN	NaN	NaN	NaN	NaN	177.97	NaN	-0.06
NaN	NaN	NaN	NaN	NaN	NaN	127.65	NaN	0.16	NaN	NaN	NaN	NaN	NaN	NaN	NaN	NaN	NaN	178.07	NaN	0.09
NaN	NaN	NaN	NaN	NaN	NaN	127.75	NaN	0.1	NaN	NaN	NaN	NaN	NaN	NaN	NaN	NaN	NaN	178.17	NaN	-0.23
NaN	NaN	NaN	NaN	NaN	NaN	127.87	NaN	0.14	NaN	NaN	NaN	NaN	NaN	NaN	NaN	NaN	NaN	178.27	NaN	-0.04
NaN	NaN	NaN	NaN	NaN	NaN	127.87	NaN	0.04	NaN	NaN	NaN	NaN	NaN	NaN	NaN	NaN	NaN	178.37	NaN	-0.02
NaN	NaN	NaN	NaN	NaN	NaN	128	NaN	0.09	NaN	NaN	NaN	NaN	NaN	NaN	NaN	NaN	NaN	178.47	NaN	-0.15
NaN	NaN	NaN	NaN	NaN	NaN	128.16	NaN	-0.05	NaN	NaN	NaN	NaN	NaN	NaN	NaN	NaN	NaN	178.57	NaN	-0.28
NaN	NaN	NaN	NaN	NaN	NaN	128.33	NaN	-0.16	NaN	NaN	NaN	NaN	NaN	NaN	NaN	NaN	NaN	178.67	NaN	0
NaN	NaN	NaN	NaN	NaN	NaN	128.38	NaN	0.17	NaN	NaN	NaN	NaN	NaN	NaN	NaN	NaN	NaN	178.77	NaN	-0.11
NaN	NaN	NaN	NaN	NaN	NaN	128.46	NaN	0.16	NaN	NaN	NaN	NaN	NaN	NaN	NaN	NaN	NaN	178.87	NaN	-0.2
NaN	NaN	NaN	NaN	NaN	NaN	128.57	NaN	0.02	NaN	NaN	NaN	NaN	NaN	NaN	NaN	NaN	NaN	178.97	NaN	-0.03
NaN	NaN	NaN	NaN	NaN	NaN	128.66	NaN	0.1	NaN	NaN	NaN	NaN	NaN	NaN	NaN	NaN	NaN	179.07	NaN	0.02
NaN	NaN	NaN	NaN	NaN	NaN	128.66	NaN	0.22	NaN	NaN	NaN	NaN	NaN	NaN	NaN	NaN	NaN	179.17	NaN	0
NaN	NaN	NaN	NaN	NaN	NaN	128.75	NaN	0.09	NaN	NaN	NaN	NaN	NaN	NaN	NaN	NaN	NaN	179.27	NaN	-0.04
NaN	NaN	NaN	NaN	NaN	NaN	128.82	NaN	0.03	NaN	NaN	NaN	NaN	NaN	NaN	NaN	NaN	NaN	179.37	NaN	-0.12
NaN	NaN	NaN	NaN	NaN	NaN	128.85	NaN	-0.08	NaN	NaN	NaN	NaN	NaN	NaN	NaN	NaN	NaN	179.47	NaN	-0.12
NaN	NaN	NaN	NaN	NaN	NaN	128.92	NaN	0.2	NaN	NaN	NaN	NaN	NaN	NaN	NaN	NaN	NaN	179.57	NaN	-0.19
NaN	NaN	NaN	NaN	NaN	NaN	128.94	NaN	0	NaN	NaN	NaN	NaN	NaN	NaN	NaN	NaN	NaN	179.67	NaN	-0.24
NaN	NaN	NaN	NaN	NaN	NaN	128.96	NaN	0.22	NaN	NaN	NaN	NaN	NaN	NaN	NaN	NaN	NaN	179.77	NaN	-0.26
NaN	NaN	NaN	NaN	NaN	NaN	129.01	NaN	0.03	NaN	NaN	NaN	NaN	NaN	NaN	NaN	NaN	NaN	179.87	NaN	-0.27
NaN	NaN	NaN	NaN	NaN	NaN	129.06	NaN	0.11	NaN	NaN	NaN	NaN	NaN	NaN	NaN	NaN	NaN	179.97	NaN	-0.06
NaN	NaN	NaN	NaN	NaN	NaN	129.07	NaN	0.14	NaN	NaN	NaN	NaN	NaN	NaN	NaN	NaN	NaN	180.07	NaN	-0.06
NaN	NaN	NaN	NaN	NaN	NaN	129.09	NaN	0.04	NaN	NaN	NaN	NaN	NaN	NaN	NaN	NaN	NaN	180.17	NaN	-0.05
NaN	NaN	NaN	NaN	NaN	NaN	129.15	NaN	0	NaN	NaN	NaN	NaN	NaN	NaN	NaN	NaN	NaN	180.27	NaN	-0.1
NaN	NaN	NaN	NaN	NaN	NaN	129.18	NaN	0.24	NaN	NaN	NaN	NaN	NaN	NaN	NaN	NaN	NaN	180.37	NaN	-0.16
NaN	NaN	NaN	NaN	NaN	NaN	129.29	NaN	0.2	NaN	NaN	NaN	NaN	NaN	NaN	NaN	NaN	NaN	180.47	NaN	-0.11
NaN	NaN	NaN	NaN	NaN	NaN	129.4	NaN	0	NaN	NaN	NaN	NaN	NaN	NaN	NaN	NaN	NaN	180.57	NaN	-0.08
NaN	NaN	NaN	NaN	NaN	NaN	129.51	NaN	0.14	NaN	NaN	NaN	NaN	NaN	NaN	NaN	NaN	NaN	180.67	NaN	-0.28
NaN	NaN	NaN	NaN	NaN	NaN	129.62	NaN	0.21	NaN	NaN	NaN	NaN	NaN	NaN	NaN	NaN	NaN	180.77	NaN	-0.21
NaN	NaN	NaN	NaN	NaN	NaN	129.71	NaN	0.15	NaN	NaN	NaN	NaN	NaN	NaN	NaN	NaN	NaN	180.87	NaN	-0.23
NaN	NaN	NaN	NaN	NaN	NaN	129.8	NaN	0.06	NaN	NaN	NaN	NaN	NaN	NaN	NaN	NaN	NaN	181.07	NaN	0.11
NaN	NaN	NaN	NaN	NaN	NaN	129.89	NaN	0.31	NaN	NaN	NaN	NaN	NaN	NaN	NaN	NaN	NaN	181.17	NaN	-0.2
NaN	NaN	NaN	NaN	NaN	NaN	129.99	NaN	0	NaN	NaN	NaN	NaN	NaN	NaN	NaN	NaN	NaN	181.27	NaN	-0.26
NaN	NaN	NaN	NaN	NaN	NaN	130.1	NaN	-0.03	NaN	NaN	NaN	NaN	NaN	NaN	NaN	NaN	NaN	181.37	NaN	-0.01
NaN	NaN	NaN	NaN	NaN	NaN	130.2	NaN	0.05	NaN	NaN	NaN	NaN	NaN	NaN	NaN	NaN	NaN	181.47	NaN	-0.13
NaN	NaN	NaN	NaN	NaN	NaN	130.2	NaN	0.19	NaN	NaN	NaN	NaN	NaN	NaN	NaN	NaN	NaN	181.57	NaN	0.02
NaN	NaN	NaN	NaN	NaN	NaN	130.31	NaN	-0.23	NaN	NaN	NaN	NaN	NaN	NaN	NaN	NaN	NaN	181.67	NaN	0.07
NaN	NaN	NaN	NaN	NaN	NaN	130.4	NaN	-0.01	NaN	NaN	NaN	NaN	NaN	NaN	NaN	NaN	NaN	181.77	NaN	-0.05
NaN	NaN	NaN	NaN	NaN	NaN	130.4	NaN	-0.16	NaN	NaN	NaN	NaN	NaN	NaN	NaN	NaN	NaN	181.87	NaN	-0.02
NaN	NaN	NaN	NaN	NaN	NaN	130.49	NaN	0	NaN	NaN	NaN	NaN	NaN	NaN	NaN	NaN	NaN	181.97	NaN	-0.25
NaN	NaN	NaN	NaN	NaN	NaN	130.55	NaN	-0.64	NaN	NaN	NaN	NaN	NaN	NaN	NaN	NaN	NaN	182.07	NaN	0.02
NaN	NaN	NaN	NaN	NaN	NaN	130.55	NaN	-0.37	NaN	NaN	NaN	NaN	NaN	NaN	NaN	NaN	NaN	182.17	NaN	-0.03
NaN	NaN	NaN	NaN	NaN	NaN	130.65	NaN	-0.5	NaN	NaN	NaN	NaN	NaN	NaN	NaN	NaN	NaN	182.27	NaN	-0.05
NaN	NaN	NaN	NaN	NaN	NaN	130.75	NaN	-0.27	NaN	NaN	NaN	NaN	NaN	NaN	NaN	NaN	NaN	182.37	NaN	-0.13
NaN	NaN	NaN	NaN	NaN	NaN	130.85	NaN	-0.31	NaN	NaN	NaN	NaN	NaN	NaN	NaN	NaN	NaN	182.47	NaN	-0.38
NaN	NaN	NaN	NaN	NaN	NaN	130.95	NaN	-0.28	NaN	NaN	NaN	NaN	NaN	NaN	NaN	NaN	NaN	182.57	NaN	-0.27
NaN	NaN	NaN	NaN	NaN	NaN	131.05	NaN	-0.14	NaN	NaN	NaN	NaN	NaN	NaN	NaN	NaN	NaN	182.67	NaN	-0.18
NaN	NaN	NaN	NaN	NaN	NaN	131.15	NaN	0.04	NaN	NaN	NaN	NaN	NaN	NaN	NaN	NaN	NaN	182.77	NaN	-0.28
NaN	NaN	NaN	NaN	NaN	NaN	131.35	NaN	0	NaN	NaN	NaN	NaN	NaN	NaN	NaN	NaN	NaN	182.87	NaN	0.06
NaN	NaN	NaN	NaN	NaN	NaN	131.45	NaN	0.09	NaN	NaN	NaN	NaN	NaN	NaN	NaN	NaN	NaN	182.89	NaN	-0.14
NaN	NaN	NaN	NaN	NaN	NaN	131.55	NaN	-0.06	NaN	NaN	NaN	NaN	NaN	NaN	NaN	NaN	NaN	182.99	NaN	-0.11
NaN	NaN	NaN	NaN	NaN	NaN	131.65	NaN	-0.1	NaN	NaN	NaN	NaN	NaN	NaN	NaN	NaN	NaN	183.09	NaN	-0.14
NaN	NaN	NaN	NaN	NaN	NaN	131.75	NaN	-0.05	NaN	NaN	NaN	NaN	NaN	NaN	NaN	NaN	NaN	183.19	NaN	-0.16
NaN	NaN	NaN	NaN	NaN	NaN	131.85	NaN	-0.33	NaN	NaN	NaN	NaN	NaN	NaN	NaN	NaN	NaN	183.29	NaN	-0.13
NaN	NaN	NaN	NaN	NaN	NaN	131.95	NaN	-0.56	NaN	NaN	NaN	NaN	NaN	NaN	NaN	NaN	NaN	183.39	NaN	-0.16
NaN	NaN	NaN	NaN	NaN	NaN	131.95	NaN	-0.58	NaN	NaN	NaN	NaN	NaN	NaN	NaN	NaN	NaN	183.59	NaN	-0.27
NaN	NaN	NaN	NaN	NaN	NaN	132.05	NaN	-0.43	NaN	NaN	NaN	NaN	NaN	NaN	NaN	NaN	NaN	183.69	NaN	-0.29
NaN	NaN	NaN	NaN	NaN	NaN	132.15	NaN	-0.63	NaN	NaN	NaN	NaN	NaN	NaN	NaN	NaN	NaN	183.79	NaN	-0.35
NaN	NaN	NaN	NaN	NaN	NaN	132.25	NaN	-0.68	NaN	NaN	NaN	NaN	NaN	NaN	NaN	NaN	NaN	183.99	NaN	-0.25
NaN	NaN	NaN	NaN	NaN	NaN	132.35	NaN	-0.57	NaN	NaN	NaN	NaN	NaN	NaN	NaN	NaN	NaN	184.09	NaN	-0.2
NaN	NaN	NaN	NaN	NaN	NaN	132.45	NaN	-0.59	NaN	NaN	NaN	NaN	NaN	NaN	NaN	NaN	NaN	184.19	NaN	-1.38
NaN	NaN	NaN	NaN	NaN	NaN	132.55	NaN	-0.56	NaN	NaN	NaN	NaN	NaN	NaN	NaN	NaN	NaN	184.29	NaN	-0.11
NaN	NaN	NaN	NaN	NaN	NaN	132.65	NaN	-0.54	NaN	NaN	NaN	NaN	NaN	NaN	NaN	NaN	NaN	184.39	NaN	-0.02
NaN	NaN	NaN	NaN	NaN	NaN	132.75	NaN	-0.5	NaN	NaN	NaN	NaN	NaN	NaN	NaN	NaN	NaN	184.49	NaN	-0.1
NaN	NaN	NaN	NaN	NaN	NaN	132.85	NaN	-0.56	NaN	NaN	NaN	NaN	NaN	NaN	NaN	NaN	NaN	184.59	NaN	-0.06
NaN	NaN	NaN	NaN	NaN	NaN	132.95	NaN	-0.37	NaN	NaN	NaN	NaN	NaN	NaN	NaN	NaN	NaN	184.69	NaN	-0.19
NaN	NaN	NaN	NaN	NaN	NaN	133.05	NaN	-0.39	NaN	NaN	NaN	NaN	NaN	NaN	NaN	NaN	NaN	184.79	NaN	-1.17
NaN	NaN	NaN	NaN	NaN	NaN	133.15	NaN	-0.1	NaN	NaN	NaN	NaN	NaN	NaN	NaN	NaN	NaN	184.89	NaN	-0.79
NaN	NaN	NaN	NaN	NaN	NaN	133.25	NaN	-0.03	NaN	NaN	NaN	NaN	NaN	NaN	NaN	NaN	NaN	184.99	NaN	-0.25
NaN	NaN	NaN	NaN	NaN	NaN	133.35	NaN	-0.15	NaN	NaN	NaN	NaN	NaN	NaN	NaN	NaN	NaN	185.09	NaN	-0.38
NaN	NaN	NaN	NaN	NaN	NaN	133.45	NaN	-0.29	NaN	NaN	NaN	NaN	NaN	NaN	NaN	NaN	NaN	185.29	NaN	-0.71
NaN	NaN	NaN	NaN	NaN	NaN	133.65	NaN	-0.23	NaN	NaN	NaN	NaN	NaN	NaN	NaN	NaN	NaN	185.39	NaN	-0.28
NaN	NaN	NaN	NaN	NaN	NaN	133.75	NaN	-0.3	NaN	NaN	NaN	NaN	NaN	NaN	NaN	NaN	NaN	185.47	NaN	-0.52
NaN	NaN	NaN	NaN	NaN	NaN	133.85	NaN	-0.28	NaN	NaN	NaN	NaN	NaN	NaN	NaN	NaN	NaN	185.57	NaN	-0.16
NaN	NaN	NaN	NaN	NaN	NaN	133.95	NaN	-0.48	NaN	NaN	NaN	NaN	NaN	NaN	NaN	NaN	NaN	185.67	NaN	-0.04
NaN	NaN	NaN	NaN	NaN	NaN	134.05	NaN	-0.11	NaN	NaN	NaN	NaN	NaN	NaN	NaN	NaN	NaN	185.77	NaN	-1.01
NaN	NaN	NaN	NaN	NaN	NaN	134.15	NaN	-0.12	NaN	NaN	NaN	NaN	NaN	NaN	NaN	NaN	NaN	185.97	NaN	-0.23
NaN	NaN	NaN	NaN	NaN	NaN	134.25	NaN	-0.73	NaN	NaN	NaN	NaN	NaN	NaN	NaN	NaN	NaN	186.07	NaN	-0.09
NaN	NaN	NaN	NaN	NaN	NaN	134.25	NaN	-0.12	NaN	NaN	NaN	NaN	NaN	NaN	NaN	NaN	NaN	186.17	NaN	-0.47
NaN	NaN	NaN	NaN	NaN	NaN	134.35	NaN	-0.11	NaN	NaN	NaN	NaN	NaN	NaN	NaN	NaN	NaN	186.27	NaN	-0.07
NaN	NaN	NaN	NaN	NaN	NaN	134.45	NaN	-0.05	NaN	NaN	NaN	NaN	NaN	NaN	NaN	NaN	NaN	186.37	NaN	-0.01
NaN	NaN	NaN	NaN	NaN	NaN	134.55	NaN	-0.06	NaN	NaN	NaN	NaN	NaN	NaN	NaN	NaN	NaN	186.47	NaN	-0.2
NaN	NaN	NaN	NaN	NaN	NaN	134.65	NaN	-0.23	NaN	NaN	NaN	NaN	NaN	NaN	NaN	NaN	NaN	186.57	NaN	-0.17
NaN	NaN	NaN	NaN	NaN	NaN	134.75	NaN	-0.22	NaN	NaN	NaN	NaN	NaN	NaN	NaN	NaN	NaN	186.67	NaN	-0.36
NaN	NaN	NaN	NaN	NaN	NaN	134.85	NaN	-0.12	NaN	NaN	NaN	NaN	NaN	NaN	NaN	NaN	NaN	186.77	NaN	-0.3
NaN	NaN	NaN	NaN	NaN	NaN	134.95	NaN	0.02	NaN	NaN	NaN	NaN	NaN	NaN	NaN	NaN	NaN	186.87	NaN	-0.32
NaN	NaN	NaN	NaN	NaN	NaN	135.05	NaN	-0.36	NaN	NaN	NaN	NaN	NaN	NaN	NaN	NaN	NaN	186.97	NaN	-0.57
NaN	NaN	NaN	NaN	NaN	NaN	135.15	NaN	-0.32	NaN	NaN	NaN	NaN	NaN	NaN	NaN	NaN	NaN	187.17	NaN	-0.68
NaN	NaN	NaN	NaN	NaN	NaN	135.25	NaN	-0.41	NaN	NaN	NaN	NaN	NaN	NaN	NaN	NaN	NaN	187.27	NaN	-0.29
NaN	NaN	NaN	NaN	NaN	NaN	135.35	NaN	-0.09	NaN	NaN	NaN	NaN	NaN	NaN	NaN	NaN	NaN	187.37	NaN	-0.31
NaN	NaN	NaN	NaN	NaN	NaN	135.45	NaN	-0.19	NaN	NaN	NaN	NaN	NaN	NaN	NaN	NaN	NaN	187.47	NaN	-0.33
NaN	NaN	NaN	NaN	NaN	NaN	135.45	NaN	-0.03	NaN	NaN	NaN	NaN	NaN	NaN	NaN	NaN	NaN	187.57	NaN	-0.27
NaN	NaN	NaN	NaN	NaN	NaN	135.55	NaN	-0.03	NaN	NaN	NaN	NaN	NaN	NaN	NaN	NaN	NaN	187.67	NaN	-0.43
NaN	NaN	NaN	NaN	NaN	NaN	135.65	NaN	-0.43	NaN	NaN	NaN	NaN	NaN	NaN	NaN	NaN	NaN	187.77	NaN	-0.32
NaN	NaN	NaN	NaN	NaN	NaN	135.75	NaN	-0.44	NaN	NaN	NaN	NaN	NaN	NaN	NaN	NaN	NaN	187.87	NaN	-0.15
NaN	NaN	NaN	NaN	NaN	NaN	135.85	NaN	-0.34	NaN	NaN	NaN	NaN	NaN	NaN	NaN	NaN	NaN	187.97	NaN	-0.14
NaN	NaN	NaN	NaN	NaN	NaN	135.95	NaN	-0.57	NaN	NaN	NaN	NaN	NaN	NaN	NaN	NaN	NaN	188.07	NaN	-0.01
NaN	NaN	NaN	NaN	NaN	NaN	135.95	NaN	-0.42	NaN	NaN	NaN	NaN	NaN	NaN	NaN	NaN	NaN	188.17	NaN	0.06
NaN	NaN	NaN	NaN	NaN	NaN	136.05	NaN	-0.53	NaN	NaN	NaN	NaN	NaN	NaN	NaN	NaN	NaN	188.27	NaN	-0.37
NaN	NaN	NaN	NaN	NaN	NaN	136.15	NaN	-0.45	NaN	NaN	NaN	NaN	NaN	NaN	NaN	NaN	NaN	188.37	NaN	-0.31
NaN	NaN	NaN	NaN	NaN	NaN	136.25	NaN	-0.55	NaN	NaN	NaN	NaN	NaN	NaN	NaN	NaN	NaN	188.47	NaN	-0.31
NaN	NaN	NaN	NaN	NaN	NaN	136.35	NaN	-0.44	NaN	NaN	NaN	NaN	NaN	NaN	NaN	NaN	NaN	188.57	NaN	-0.07
NaN	NaN	NaN	NaN	NaN	NaN	136.45	NaN	-0.53	NaN	NaN	NaN	NaN	NaN	NaN	NaN	NaN	NaN	188.67	NaN	-0.12
NaN	NaN	NaN	NaN	NaN	NaN	136.55	NaN	-0.37	NaN	NaN	NaN	NaN	NaN	NaN	NaN	NaN	NaN	188.77	NaN	-0.39
NaN	NaN	NaN	NaN	NaN	NaN	136.65	NaN	-0.57	NaN	NaN	NaN	NaN	NaN	NaN	NaN	NaN	NaN	188.87	NaN	-0.21
NaN	NaN	NaN	NaN	NaN	NaN	136.75	NaN	-0.41	NaN	NaN	NaN	NaN	NaN	NaN	NaN	NaN	NaN	188.97	NaN	-0.25
NaN	NaN	NaN	NaN	NaN	NaN	136.85	NaN	-0.22	NaN	NaN	NaN	NaN	NaN	NaN	NaN	NaN	NaN	189.07	NaN	-0.31
NaN	NaN	NaN	NaN	NaN	NaN	136.95	NaN	-0.07	NaN	NaN	NaN	NaN	NaN	NaN	NaN	NaN	NaN	189.17	NaN	-0.18
NaN	NaN	NaN	NaN	NaN	NaN	137.05	NaN	-0.27	NaN	NaN	NaN	NaN	NaN	NaN	NaN	NaN	NaN	189.27	NaN	0.01
NaN	NaN	NaN	NaN	NaN	NaN	137.05	NaN	-0.04	NaN	NaN	NaN	NaN	NaN	NaN	NaN	NaN	NaN	189.37	NaN	-0.23
NaN	NaN	NaN	NaN	NaN	NaN	137.25	NaN	-0.29	NaN	NaN	NaN	NaN	NaN	NaN	NaN	NaN	NaN	189.47	NaN	0.04
NaN	NaN	NaN	NaN	NaN	NaN	137.35	NaN	-0.23	NaN	NaN	NaN	NaN	NaN	NaN	NaN	NaN	NaN	189.57	NaN	-0.08
NaN	NaN	NaN	NaN	NaN	NaN	137.45	NaN	-0.36	NaN	NaN	NaN	NaN	NaN	NaN	NaN	NaN	NaN	189.77	NaN	-0.53
NaN	NaN	NaN	NaN	NaN	NaN	137.55	NaN	-0.54	NaN	NaN	NaN	NaN	NaN	NaN	NaN	NaN	NaN	189.87	NaN	-0.15
NaN	NaN	NaN	NaN	NaN	NaN	137.65	NaN	-0.36	NaN	NaN	NaN	NaN	NaN	NaN	NaN	NaN	NaN	189.97	NaN	-0.25
NaN	NaN	NaN	NaN	NaN	NaN	137.75	NaN	-0.28	NaN	NaN	NaN	NaN	NaN	NaN	NaN	NaN	NaN	190.07	NaN	-0.16
NaN	NaN	NaN	NaN	NaN	NaN	137.85	NaN	-0.24	NaN	NaN	NaN	NaN	NaN	NaN	NaN	NaN	NaN	190.17	NaN	-0.29
NaN	NaN	NaN	NaN	NaN	NaN	137.95	NaN	-0.26	NaN	NaN	NaN	NaN	NaN	NaN	NaN	NaN	NaN	190.27	NaN	-0.25
NaN	NaN	NaN	NaN	NaN	NaN	138.05	NaN	-0.29	NaN	NaN	NaN	NaN	NaN	NaN	NaN	NaN	NaN	190.37	NaN	-0.17
NaN	NaN	NaN	NaN	NaN	NaN	138.15	NaN	-0.33	NaN	NaN	NaN	NaN	NaN	NaN	NaN	NaN	NaN	190.47	NaN	-0.15
NaN	NaN	NaN	NaN	NaN	NaN	138.25	NaN	-0.43	NaN	NaN	NaN	NaN	NaN	NaN	NaN	NaN	NaN	190.57	NaN	-0.13
NaN	NaN	NaN	NaN	NaN	NaN	138.35	NaN	-0.41	NaN	NaN	NaN	NaN	NaN	NaN	NaN	NaN	NaN	190.77	NaN	-0.1
NaN	NaN	NaN	NaN	NaN	NaN	138.45	NaN	-0.65	NaN	NaN	NaN	NaN	NaN	NaN	NaN	NaN	NaN	NaN	NaN	NaN
NaN	NaN	NaN	NaN	NaN	NaN	138.55	NaN	-0.68	NaN	NaN	NaN	NaN	NaN	NaN	NaN	NaN	NaN	NaN	NaN	NaN
NaN	NaN	NaN	NaN	NaN	NaN	138.65	NaN	-0.66	NaN	NaN	NaN	NaN	NaN	NaN	NaN	NaN	NaN	NaN	NaN	NaN
NaN	NaN	NaN	NaN	NaN	NaN	138.75	NaN	-0.45	NaN	NaN	NaN	NaN	NaN	NaN	NaN	NaN	NaN	NaN	NaN	NaN
NaN	NaN	NaN	NaN	NaN	NaN	138.75	NaN	-0.36	NaN	NaN	NaN	NaN	NaN	NaN	NaN	NaN	NaN	NaN	NaN	NaN
NaN	NaN	NaN	NaN	NaN	NaN	138.85	NaN	-0.42	NaN	NaN	NaN	NaN	NaN	NaN	NaN	NaN	NaN	NaN	NaN	NaN
NaN	NaN	NaN	NaN	NaN	NaN	138.95	NaN	-0.43	NaN	NaN	NaN	NaN	NaN	NaN	NaN	NaN	NaN	NaN	NaN	NaN
NaN	NaN	NaN	NaN	NaN	NaN	139.05	NaN	-0.52	NaN	NaN	NaN	NaN	NaN	NaN	NaN	NaN	NaN	NaN	NaN	NaN
NaN	NaN	NaN	NaN	NaN	NaN	139.15	NaN	-0.26	NaN	NaN	NaN	NaN	NaN	NaN	NaN	NaN	NaN	NaN	NaN	NaN
NaN	NaN	NaN	NaN	NaN	NaN	139.25	NaN	-0.32	NaN	NaN	NaN	NaN	NaN	NaN	NaN	NaN	NaN	NaN	NaN	NaN
NaN	NaN	NaN	NaN	NaN	NaN	139.35	NaN	-0.36	NaN	NaN	NaN	NaN	NaN	NaN	NaN	NaN	NaN	NaN	NaN	NaN
NaN	NaN	NaN	NaN	NaN	NaN	139.45	NaN	-0.14	NaN	NaN	NaN	NaN	NaN	NaN	NaN	NaN	NaN	NaN	NaN	NaN
NaN	NaN	NaN	NaN	NaN	NaN	139.55	NaN	-0.17	NaN	NaN	NaN	NaN	NaN	NaN	NaN	NaN	NaN	NaN	NaN	NaN
NaN	NaN	NaN	NaN	NaN	NaN	139.65	NaN	-0.23	NaN	NaN	NaN	NaN	NaN	NaN	NaN	NaN	NaN	NaN	NaN	NaN
NaN	NaN	NaN	NaN	NaN	NaN	139.75	NaN	-0.34	NaN	NaN	NaN	NaN	NaN	NaN	NaN	NaN	NaN	NaN	NaN	NaN
NaN	NaN	NaN	NaN	NaN	NaN	139.85	NaN	-0.48	NaN	NaN	NaN	NaN	NaN	NaN	NaN	NaN	NaN	NaN	NaN	NaN
NaN	NaN	NaN	NaN	NaN	NaN	139.96	NaN	-0.43	NaN	NaN	NaN	NaN	NaN	NaN	NaN	NaN	NaN	NaN	NaN	NaN
NaN	NaN	NaN	NaN	NaN	NaN	140.04	NaN	-0.14	NaN	NaN	NaN	NaN	NaN	NaN	NaN	NaN	NaN	NaN	NaN	NaN
NaN	NaN	NaN	NaN	NaN	NaN	140.06	NaN	-0.21	NaN	NaN	NaN	NaN	NaN	NaN	NaN	NaN	NaN	NaN	NaN	NaN
NaN	NaN	NaN	NaN	NaN	NaN	140.15	NaN	-0.29	NaN	NaN	NaN	NaN	NaN	NaN	NaN	NaN	NaN	NaN	NaN	NaN
NaN	NaN	NaN	NaN	NaN	NaN	140.32	NaN	-0.24	NaN	NaN	NaN	NaN	NaN	NaN	NaN	NaN	NaN	NaN	NaN	NaN
NaN	NaN	NaN	NaN	NaN	NaN	140.45	NaN	-0.31	NaN	NaN	NaN	NaN	NaN	NaN	NaN	NaN	NaN	NaN	NaN	NaN
NaN	NaN	NaN	NaN	NaN	NaN	140.65	NaN	-0.22	NaN	NaN	NaN	NaN	NaN	NaN	NaN	NaN	NaN	NaN	NaN	NaN
NaN	NaN	NaN	NaN	NaN	NaN	140.75	NaN	-0.17	NaN	NaN	NaN	NaN	NaN	NaN	NaN	NaN	NaN	NaN	NaN	NaN
NaN	NaN	NaN	NaN	NaN	NaN	140.84	NaN	-0.26	NaN	NaN	NaN	NaN	NaN	NaN	NaN	NaN	NaN	NaN	NaN	NaN
NaN	NaN	NaN	NaN	NaN	NaN	140.95	NaN	-0.12	NaN	NaN	NaN	NaN	NaN	NaN	NaN	NaN	NaN	NaN	NaN	NaN
NaN	NaN	NaN	NaN	NaN	NaN	141.53	NaN	-0.23	NaN	NaN	NaN	NaN	NaN	NaN	NaN	NaN	NaN	NaN	NaN	NaN
NaN	NaN	NaN	NaN	NaN	NaN	141.75	NaN	-0.23	NaN	NaN	NaN	NaN	NaN	NaN	NaN	NaN	NaN	NaN	NaN	NaN
NaN	NaN	NaN	NaN	NaN	NaN	141.75	NaN	-0.08	NaN	NaN	NaN	NaN	NaN	NaN	NaN	NaN	NaN	NaN	NaN	NaN
NaN	NaN	NaN	NaN	NaN	NaN	141.85	NaN	-0.18	NaN	NaN	NaN	NaN	NaN	NaN	NaN	NaN	NaN	NaN	NaN	NaN
NaN	NaN	NaN	NaN	NaN	NaN	141.95	NaN	-0.39	NaN	NaN	NaN	NaN	NaN	NaN	NaN	NaN	NaN	NaN	NaN	NaN
NaN	NaN	NaN	NaN	NaN	NaN	142.05	NaN	-0.32	NaN	NaN	NaN	NaN	NaN	NaN	NaN	NaN	NaN	NaN	NaN	NaN
NaN	NaN	NaN	NaN	NaN	NaN	142.15	NaN	-0.2	NaN	NaN	NaN	NaN	NaN	NaN	NaN	NaN	NaN	NaN	NaN	NaN
NaN	NaN	NaN	NaN	NaN	NaN	142.25	NaN	-0.07	NaN	NaN	NaN	NaN	NaN	NaN	NaN	NaN	NaN	NaN	NaN	NaN
NaN	NaN	NaN	NaN	NaN	NaN	142.35	NaN	-0.04	NaN	NaN	NaN	NaN	NaN	NaN	NaN	NaN	NaN	NaN	NaN	NaN
NaN	NaN	NaN	NaN	NaN	NaN	142.35	NaN	-0.35	NaN	NaN	NaN	NaN	NaN	NaN	NaN	NaN	NaN	NaN	NaN	NaN
NaN	NaN	NaN	NaN	NaN	NaN	142.45	NaN	-0.19	NaN	NaN	NaN	NaN	NaN	NaN	NaN	NaN	NaN	NaN	NaN	NaN
NaN	NaN	NaN	NaN	NaN	NaN	142.55	NaN	-0.09	NaN	NaN	NaN	NaN	NaN	NaN	NaN	NaN	NaN	NaN	NaN	NaN
NaN	NaN	NaN	NaN	NaN	NaN	142.63	NaN	-0.01	NaN	NaN	NaN	NaN	NaN	NaN	NaN	NaN	NaN	NaN	NaN	NaN
NaN	NaN	NaN	NaN	NaN	NaN	142.65	NaN	-0.08	NaN	NaN	NaN	NaN	NaN	NaN	NaN	NaN	NaN	NaN	NaN	NaN
NaN	NaN	NaN	NaN	NaN	NaN	142.75	NaN	0.07	NaN	NaN	NaN	NaN	NaN	NaN	NaN	NaN	NaN	NaN	NaN	NaN
NaN	NaN	NaN	NaN	NaN	NaN	142.85	NaN	0	NaN	NaN	NaN	NaN	NaN	NaN	NaN	NaN	NaN	NaN	NaN	NaN
NaN	NaN	NaN	NaN	NaN	NaN	143.05	NaN	0.04	NaN	NaN	NaN	NaN	NaN	NaN	NaN	NaN	NaN	NaN	NaN	NaN
NaN	NaN	NaN	NaN	NaN	NaN	143.25	NaN	-0.03	NaN	NaN	NaN	NaN	NaN	NaN	NaN	NaN	NaN	NaN	NaN	NaN
NaN	NaN	NaN	NaN	NaN	NaN	143.25	NaN	-0.08	NaN	NaN	NaN	NaN	NaN	NaN	NaN	NaN	NaN	NaN	NaN	NaN
NaN	NaN	NaN	NaN	NaN	NaN	143.45	NaN	0.15	NaN	NaN	NaN	NaN	NaN	NaN	NaN	NaN	NaN	NaN	NaN	NaN
NaN	NaN	NaN	NaN	NaN	NaN	143.45	NaN	-0.45	NaN	NaN	NaN	NaN	NaN	NaN	NaN	NaN	NaN	NaN	NaN	NaN
NaN	NaN	NaN	NaN	NaN	NaN	143.55	NaN	0.01	NaN	NaN	NaN	NaN	NaN	NaN	NaN	NaN	NaN	NaN	NaN	NaN
NaN	NaN	NaN	NaN	NaN	NaN	143.65	NaN	-0.48	NaN	NaN	NaN	NaN	NaN	NaN	NaN	NaN	NaN	NaN	NaN	NaN
NaN	NaN	NaN	NaN	NaN	NaN	143.95	NaN	-0.08	NaN	NaN	NaN	NaN	NaN	NaN	NaN	NaN	NaN	NaN	NaN	NaN
NaN	NaN	NaN	NaN	NaN	NaN	144.15	NaN	-0.21	NaN	NaN	NaN	NaN	NaN	NaN	NaN	NaN	NaN	NaN	NaN	NaN
NaN	NaN	NaN	NaN	NaN	NaN	144.25	NaN	-0.32	NaN	NaN	NaN	NaN	NaN	NaN	NaN	NaN	NaN	NaN	NaN	NaN
NaN	NaN	NaN	NaN	NaN	NaN	144.35	NaN	-0.27	NaN	NaN	NaN	NaN	NaN	NaN	NaN	NaN	NaN	NaN	NaN	NaN
NaN	NaN	NaN	NaN	NaN	NaN	144.45	NaN	-0.28	NaN	NaN	NaN	NaN	NaN	NaN	NaN	NaN	NaN	NaN	NaN	NaN
NaN	NaN	NaN	NaN	NaN	NaN	144.55	NaN	-0.41	NaN	NaN	NaN	NaN	NaN	NaN	NaN	NaN	NaN	NaN	NaN	NaN
NaN	NaN	NaN	NaN	NaN	NaN	144.65	NaN	-0.23	NaN	NaN	NaN	NaN	NaN	NaN	NaN	NaN	NaN	NaN	NaN	NaN
NaN	NaN	NaN	NaN	NaN	NaN	144.65	NaN	-0.49	NaN	NaN	NaN	NaN	NaN	NaN	NaN	NaN	NaN	NaN	NaN	NaN
NaN	NaN	NaN	NaN	NaN	NaN	144.75	NaN	-0.24	NaN	NaN	NaN	NaN	NaN	NaN	NaN	NaN	NaN	NaN	NaN	NaN
NaN	NaN	NaN	NaN	NaN	NaN	144.85	NaN	-0.21	NaN	NaN	NaN	NaN	NaN	NaN	NaN	NaN	NaN	NaN	NaN	NaN
NaN	NaN	NaN	NaN	NaN	NaN	144.92	NaN	-0.18	NaN	NaN	NaN	NaN	NaN	NaN	NaN	NaN	NaN	NaN	NaN	NaN
NaN	NaN	NaN	NaN	NaN	NaN	145.05	NaN	-0.2	NaN	NaN	NaN	NaN	NaN	NaN	NaN	NaN	NaN	NaN	NaN	NaN
NaN	NaN	NaN	NaN	NaN	NaN	145.15	NaN	-0.23	NaN	NaN	NaN	NaN	NaN	NaN	NaN	NaN	NaN	NaN	NaN	NaN
NaN	NaN	NaN	NaN	NaN	NaN	145.25	NaN	-0.07	NaN	NaN	NaN	NaN	NaN	NaN	NaN	NaN	NaN	NaN	NaN	NaN
NaN	NaN	NaN	NaN	NaN	NaN	145.25	NaN	-0.35	NaN	NaN	NaN	NaN	NaN	NaN	NaN	NaN	NaN	NaN	NaN	NaN
NaN	NaN	NaN	NaN	NaN	NaN	145.34	NaN	-0.43	NaN	NaN	NaN	NaN	NaN	NaN	NaN	NaN	NaN	NaN	NaN	NaN
NaN	NaN	NaN	NaN	NaN	NaN	145.35	NaN	-0.24	NaN	NaN	NaN	NaN	NaN	NaN	NaN	NaN	NaN	NaN	NaN	NaN
NaN	NaN	NaN	NaN	NaN	NaN	145.45	NaN	-0.24	NaN	NaN	NaN	NaN	NaN	NaN	NaN	NaN	NaN	NaN	NaN	NaN
NaN	NaN	NaN	NaN	NaN	NaN	145.47	NaN	-0.3	NaN	NaN	NaN	NaN	NaN	NaN	NaN	NaN	NaN	NaN	NaN	NaN
NaN	NaN	NaN	NaN	NaN	NaN	145.55	NaN	-0.5	NaN	NaN	NaN	NaN	NaN	NaN	NaN	NaN	NaN	NaN	NaN	NaN
NaN	NaN	NaN	NaN	NaN	NaN	145.64	NaN	-0.27	NaN	NaN	NaN	NaN	NaN	NaN	NaN	NaN	NaN	NaN	NaN	NaN
NaN	NaN	NaN	NaN	NaN	NaN	145.66	NaN	-0.71	NaN	NaN	NaN	NaN	NaN	NaN	NaN	NaN	NaN	NaN	NaN	NaN
NaN	NaN	NaN	NaN	NaN	NaN	145.74	NaN	-0.57	NaN	NaN	NaN	NaN	NaN	NaN	NaN	NaN	NaN	NaN	NaN	NaN
NaN	NaN	NaN	NaN	NaN	NaN	145.76	NaN	-0.89	NaN	NaN	NaN	NaN	NaN	NaN	NaN	NaN	NaN	NaN	NaN	NaN
NaN	NaN	NaN	NaN	NaN	NaN	145.81	NaN	-0.56	NaN	NaN	NaN	NaN	NaN	NaN	NaN	NaN	NaN	NaN	NaN	NaN
NaN	NaN	NaN	NaN	NaN	NaN	145.86	NaN	-0.55	NaN	NaN	NaN	NaN	NaN	NaN	NaN	NaN	NaN	NaN	NaN	NaN
NaN	NaN	NaN	NaN	NaN	NaN	145.88	NaN	-0.61	NaN	NaN	NaN	NaN	NaN	NaN	NaN	NaN	NaN	NaN	NaN	NaN
NaN	NaN	NaN	NaN	NaN	NaN	145.89	NaN	-0.23	NaN	NaN	NaN	NaN	NaN	NaN	NaN	NaN	NaN	NaN	NaN	NaN
NaN	NaN	NaN	NaN	NaN	NaN	145.93	NaN	-0.04	NaN	NaN	NaN	NaN	NaN	NaN	NaN	NaN	NaN	NaN	NaN	NaN
NaN	NaN	NaN	NaN	NaN	NaN	145.97	NaN	-0.15	NaN	NaN	NaN	NaN	NaN	NaN	NaN	NaN	NaN	NaN	NaN	NaN
NaN	NaN	NaN	NaN	NaN	NaN	145.99	NaN	-0.54	NaN	NaN	NaN	NaN	NaN	NaN	NaN	NaN	NaN	NaN	NaN	NaN
NaN	NaN	NaN	NaN	NaN	NaN	146.05	NaN	-0.14	NaN	NaN	NaN	NaN	NaN	NaN	NaN	NaN	NaN	NaN	NaN	NaN
NaN	NaN	NaN	NaN	NaN	NaN	146.09	NaN	-0.42	NaN	NaN	NaN	NaN	NaN	NaN	NaN	NaN	NaN	NaN	NaN	NaN
NaN	NaN	NaN	NaN	NaN	NaN	146.2	NaN	-0.35	NaN	NaN	NaN	NaN	NaN	NaN	NaN	NaN	NaN	NaN	NaN	NaN
NaN	NaN	NaN	NaN	NaN	NaN	146.31	NaN	-0.03	NaN	NaN	NaN	NaN	NaN	NaN	NaN	NaN	NaN	NaN	NaN	NaN
NaN	NaN	NaN	NaN	NaN	NaN	146.42	NaN	-0.29	NaN	NaN	NaN	NaN	NaN	NaN	NaN	NaN	NaN	NaN	NaN	NaN
NaN	NaN	NaN	NaN	NaN	NaN	146.42	NaN	-0.09	NaN	NaN	NaN	NaN	NaN	NaN	NaN	NaN	NaN	NaN	NaN	NaN
NaN	NaN	NaN	NaN	NaN	NaN	146.53	NaN	-0.11	NaN	NaN	NaN	NaN	NaN	NaN	NaN	NaN	NaN	NaN	NaN	NaN
NaN	NaN	NaN	NaN	NaN	NaN	146.65	NaN	-0.16	NaN	NaN	NaN	NaN	NaN	NaN	NaN	NaN	NaN	NaN	NaN	NaN
NaN	NaN	NaN	NaN	NaN	NaN	146.75	NaN	-0.19	NaN	NaN	NaN	NaN	NaN	NaN	NaN	NaN	NaN	NaN	NaN	NaN
NaN	NaN	NaN	NaN	NaN	NaN	146.86	NaN	-0.26	NaN	NaN	NaN	NaN	NaN	NaN	NaN	NaN	NaN	NaN	NaN	NaN
NaN	NaN	NaN	NaN	NaN	NaN	146.86	NaN	-0.26	NaN	NaN	NaN	NaN	NaN	NaN	NaN	NaN	NaN	NaN	NaN	NaN
NaN	NaN	NaN	NaN	NaN	NaN	146.97	NaN	-0.37	NaN	NaN	NaN	NaN	NaN	NaN	NaN	NaN	NaN	NaN	NaN	NaN
NaN	NaN	NaN	NaN	NaN	NaN	147.08	NaN	-0.45	NaN	NaN	NaN	NaN	NaN	NaN	NaN	NaN	NaN	NaN	NaN	NaN
NaN	NaN	NaN	NaN	NaN	NaN	147.19	NaN	-0.52	NaN	NaN	NaN	NaN	NaN	NaN	NaN	NaN	NaN	NaN	NaN	NaN
NaN	NaN	NaN	NaN	NaN	NaN	147.3	NaN	-0.5	NaN	NaN	NaN	NaN	NaN	NaN	NaN	NaN	NaN	NaN	NaN	NaN
NaN	NaN	NaN	NaN	NaN	NaN	147.4	NaN	-0.23	NaN	NaN	NaN	NaN	NaN	NaN	NaN	NaN	NaN	NaN	NaN	NaN
NaN	NaN	NaN	NaN	NaN	NaN	147.49	NaN	-0.1	NaN	NaN	NaN	NaN	NaN	NaN	NaN	NaN	NaN	NaN	NaN	NaN
NaN	NaN	NaN	NaN	NaN	NaN	147.58	NaN	-0.48	NaN	NaN	NaN	NaN	NaN	NaN	NaN	NaN	NaN	NaN	NaN	NaN
NaN	NaN	NaN	NaN	NaN	NaN	147.58	NaN	-0.17	NaN	NaN	NaN	NaN	NaN	NaN	NaN	NaN	NaN	NaN	NaN	NaN
NaN	NaN	NaN	NaN	NaN	NaN	147.68	NaN	-0.03	NaN	NaN	NaN	NaN	NaN	NaN	NaN	NaN	NaN	NaN	NaN	NaN
NaN	NaN	NaN	NaN	NaN	NaN	147.77	NaN	-0.08	NaN	NaN	NaN	NaN	NaN	NaN	NaN	NaN	NaN	NaN	NaN	NaN
NaN	NaN	NaN	NaN	NaN	NaN	147.86	NaN	0.04	NaN	NaN	NaN	NaN	NaN	NaN	NaN	NaN	NaN	NaN	NaN	NaN
NaN	NaN	NaN	NaN	NaN	NaN	147.95	NaN	-0.04	NaN	NaN	NaN	NaN	NaN	NaN	NaN	NaN	NaN	NaN	NaN	NaN
NaN	NaN	NaN	NaN	NaN	NaN	148.05	NaN	-0.23	NaN	NaN	NaN	NaN	NaN	NaN	NaN	NaN	NaN	NaN	NaN	NaN
NaN	NaN	NaN	NaN	NaN	NaN	148.14	NaN	-0.23	NaN	NaN	NaN	NaN	NaN	NaN	NaN	NaN	NaN	NaN	NaN	NaN
NaN	NaN	NaN	NaN	NaN	NaN	148.23	NaN	-0.2	NaN	NaN	NaN	NaN	NaN	NaN	NaN	NaN	NaN	NaN	NaN	NaN
NaN	NaN	NaN	NaN	NaN	NaN	148.33	NaN	-0.23	NaN	NaN	NaN	NaN	NaN	NaN	NaN	NaN	NaN	NaN	NaN	NaN
NaN	NaN	NaN	NaN	NaN	NaN	148.42	NaN	-0.25	NaN	NaN	NaN	NaN	NaN	NaN	NaN	NaN	NaN	NaN	NaN	NaN
NaN	NaN	NaN	NaN	NaN	NaN	148.51	NaN	-0.17	NaN	NaN	NaN	NaN	NaN	NaN	NaN	NaN	NaN	NaN	NaN	NaN
NaN	NaN	NaN	NaN	NaN	NaN	148.6	NaN	-0.22	NaN	NaN	NaN	NaN	NaN	NaN	NaN	NaN	NaN	NaN	NaN	NaN
NaN	NaN	NaN	NaN	NaN	NaN	148.7	NaN	-0.14	NaN	NaN	NaN	NaN	NaN	NaN	NaN	NaN	NaN	NaN	NaN	NaN
NaN	NaN	NaN	NaN	NaN	NaN	148.88	NaN	-0.08	NaN	NaN	NaN	NaN	NaN	NaN	NaN	NaN	NaN	NaN	NaN	NaN
NaN	NaN	NaN	NaN	NaN	NaN	148.97	NaN	-0.09	NaN	NaN	NaN	NaN	NaN	NaN	NaN	NaN	NaN	NaN	NaN	NaN
NaN	NaN	NaN	NaN	NaN	NaN	149.07	NaN	-0.37	NaN	NaN	NaN	NaN	NaN	NaN	NaN	NaN	NaN	NaN	NaN	NaN
NaN	NaN	NaN	NaN	NaN	NaN	149.16	NaN	-0.29	NaN	NaN	NaN	NaN	NaN	NaN	NaN	NaN	NaN	NaN	NaN	NaN
NaN	NaN	NaN	NaN	NaN	NaN	149.28	NaN	-0.14	NaN	NaN	NaN	NaN	NaN	NaN	NaN	NaN	NaN	NaN	NaN	NaN
NaN	NaN	NaN	NaN	NaN	NaN	149.4	NaN	-0.25	NaN	NaN	NaN	NaN	NaN	NaN	NaN	NaN	NaN	NaN	NaN	NaN
NaN	NaN	NaN	NaN	NaN	NaN	149.52	NaN	-0.16	NaN	NaN	NaN	NaN	NaN	NaN	NaN	NaN	NaN	NaN	NaN	NaN
NaN	NaN	NaN	NaN	NaN	NaN	149.66	NaN	-0.29	NaN	NaN	NaN	NaN	NaN	NaN	NaN	NaN	NaN	NaN	NaN	NaN
NaN	NaN	NaN	NaN	NaN	NaN	149.76	NaN	-0.34	NaN	NaN	NaN	NaN	NaN	NaN	NaN	NaN	NaN	NaN	NaN	NaN
NaN	NaN	NaN	NaN	NaN	NaN	149.89	NaN	-0.31	NaN	NaN	NaN	NaN	NaN	NaN	NaN	NaN	NaN	NaN	NaN	NaN
NaN	NaN	NaN	NaN	NaN	NaN	150.01	NaN	-0.45	NaN	NaN	NaN	NaN	NaN	NaN	NaN	NaN	NaN	NaN	NaN	NaN
NaN	NaN	NaN	NaN	NaN	NaN	150.25	NaN	-0.46	NaN	NaN	NaN	NaN	NaN	NaN	NaN	NaN	NaN	NaN	NaN	NaN
NaN	NaN	NaN	NaN	NaN	NaN	150.38	NaN	-0.36	NaN	NaN	NaN	NaN	NaN	NaN	NaN	NaN	NaN	NaN	NaN	NaN
NaN	NaN	NaN	NaN	NaN	NaN	150.5	NaN	-0.35	NaN	NaN	NaN	NaN	NaN	NaN	NaN	NaN	NaN	NaN	NaN	NaN
NaN	NaN	NaN	NaN	NaN	NaN	150.62	NaN	-0.56	NaN	NaN	NaN	NaN	NaN	NaN	NaN	NaN	NaN	NaN	NaN	NaN
NaN	NaN	NaN	NaN	NaN	NaN	150.73	NaN	-0.4	NaN	NaN	NaN	NaN	NaN	NaN	NaN	NaN	NaN	NaN	NaN	NaN
NaN	NaN	NaN	NaN	NaN	NaN	150.75	NaN	-0.31	NaN	NaN	NaN	NaN	NaN	NaN	NaN	NaN	NaN	NaN	NaN	NaN
NaN	NaN	NaN	NaN	NaN	NaN	150.99	NaN	-0.25	NaN	NaN	NaN	NaN	NaN	NaN	NaN	NaN	NaN	NaN	NaN	NaN
NaN	NaN	NaN	NaN	NaN	NaN	151.06	NaN	-0.19	NaN	NaN	NaN	NaN	NaN	NaN	NaN	NaN	NaN	NaN	NaN	NaN
NaN	NaN	NaN	NaN	NaN	NaN	151.15	NaN	-0.05	NaN	NaN	NaN	NaN	NaN	NaN	NaN	NaN	NaN	NaN	NaN	NaN
NaN	NaN	NaN	NaN	NaN	NaN	151.24	NaN	-0.27	NaN	NaN	NaN	NaN	NaN	NaN	NaN	NaN	NaN	NaN	NaN	NaN
NaN	NaN	NaN	NaN	NaN	NaN	151.24	NaN	-0.1	NaN	NaN	NaN	NaN	NaN	NaN	NaN	NaN	NaN	NaN	NaN	NaN
NaN	NaN	NaN	NaN	NaN	NaN	151.35	NaN	-0.07	NaN	NaN	NaN	NaN	NaN	NaN	NaN	NaN	NaN	NaN	NaN	NaN
NaN	NaN	NaN	NaN	NaN	NaN	151.46	NaN	-0.28	NaN	NaN	NaN	NaN	NaN	NaN	NaN	NaN	NaN	NaN	NaN	NaN
NaN	NaN	NaN	NaN	NaN	NaN	151.55	NaN	-0.37	NaN	NaN	NaN	NaN	NaN	NaN	NaN	NaN	NaN	NaN	NaN	NaN
NaN	NaN	NaN	NaN	NaN	NaN	151.65	NaN	-0.45	NaN	NaN	NaN	NaN	NaN	NaN	NaN	NaN	NaN	NaN	NaN	NaN
NaN	NaN	NaN	NaN	NaN	NaN	151.74	NaN	-0.51	NaN	NaN	NaN	NaN	NaN	NaN	NaN	NaN	NaN	NaN	NaN	NaN
NaN	NaN	NaN	NaN	NaN	NaN	151.85	NaN	-0.31	NaN	NaN	NaN	NaN	NaN	NaN	NaN	NaN	NaN	NaN	NaN	NaN
NaN	NaN	NaN	NaN	NaN	NaN	151.96	NaN	-0.27	NaN	NaN	NaN	NaN	NaN	NaN	NaN	NaN	NaN	NaN	NaN	NaN
NaN	NaN	NaN	NaN	NaN	NaN	152.06	NaN	-0.27	NaN	NaN	NaN	NaN	NaN	NaN	NaN	NaN	NaN	NaN	NaN	NaN
NaN	NaN	NaN	NaN	NaN	NaN	152.14	NaN	-0.27	NaN	NaN	NaN	NaN	NaN	NaN	NaN	NaN	NaN	NaN	NaN	NaN
NaN	NaN	NaN	NaN	NaN	NaN	152.27	NaN	-0.03	NaN	NaN	NaN	NaN	NaN	NaN	NaN	NaN	NaN	NaN	NaN	NaN
NaN	NaN	NaN	NaN	NaN	NaN	152.34	NaN	0.01	NaN	NaN	NaN	NaN	NaN	NaN	NaN	NaN	NaN	NaN	NaN	NaN
NaN	NaN	NaN	NaN	NaN	NaN	152.42	NaN	0.01	NaN	NaN	NaN	NaN	NaN	NaN	NaN	NaN	NaN	NaN	NaN	NaN
NaN	NaN	NaN	NaN	NaN	NaN	152.54	NaN	-0.1	NaN	NaN	NaN	NaN	NaN	NaN	NaN	NaN	NaN	NaN	NaN	NaN
NaN	NaN	NaN	NaN	NaN	NaN	152.61	NaN	-0.07	NaN	NaN	NaN	NaN	NaN	NaN	NaN	NaN	NaN	NaN	NaN	NaN
NaN	NaN	NaN	NaN	NaN	NaN	152.69	NaN	-0.34	NaN	NaN	NaN	NaN	NaN	NaN	NaN	NaN	NaN	NaN	NaN	NaN
NaN	NaN	NaN	NaN	NaN	NaN	152.79	NaN	-0.5	NaN	NaN	NaN	NaN	NaN	NaN	NaN	NaN	NaN	NaN	NaN	NaN
NaN	NaN	NaN	NaN	NaN	NaN	152.81	NaN	-0.33	NaN	NaN	NaN	NaN	NaN	NaN	NaN	NaN	NaN	NaN	NaN	NaN
NaN	NaN	NaN	NaN	NaN	NaN	152.89	NaN	-0.4	NaN	NaN	NaN	NaN	NaN	NaN	NaN	NaN	NaN	NaN	NaN	NaN
NaN	NaN	NaN	NaN	NaN	NaN	152.89	NaN	-0.34	NaN	NaN	NaN	NaN	NaN	NaN	NaN	NaN	NaN	NaN	NaN	NaN
NaN	NaN	NaN	NaN	NaN	NaN	152.97	NaN	-0.43	NaN	NaN	NaN	NaN	NaN	NaN	NaN	NaN	NaN	NaN	NaN	NaN
NaN	NaN	NaN	NaN	NaN	NaN	153.04	NaN	-0.46	NaN	NaN	NaN	NaN	NaN	NaN	NaN	NaN	NaN	NaN	NaN	NaN
NaN	NaN	NaN	NaN	NaN	NaN	153.12	NaN	-0.22	NaN	NaN	NaN	NaN	NaN	NaN	NaN	NaN	NaN	NaN	NaN	NaN
NaN	NaN	NaN	NaN	NaN	NaN	153.21	NaN	-0.3	NaN	NaN	NaN	NaN	NaN	NaN	NaN	NaN	NaN	NaN	NaN	NaN
NaN	NaN	NaN	NaN	NaN	NaN	153.33	NaN	-0.44	NaN	NaN	NaN	NaN	NaN	NaN	NaN	NaN	NaN	NaN	NaN	NaN
NaN	NaN	NaN	NaN	NaN	NaN	153.46	NaN	-0.46	NaN	NaN	NaN	NaN	NaN	NaN	NaN	NaN	NaN	NaN	NaN	NaN
NaN	NaN	NaN	NaN	NaN	NaN	153.58	NaN	-0.28	NaN	NaN	NaN	NaN	NaN	NaN	NaN	NaN	NaN	NaN	NaN	NaN
NaN	NaN	NaN	NaN	NaN	NaN	153.58	NaN	-0.17	NaN	NaN	NaN	NaN	NaN	NaN	NaN	NaN	NaN	NaN	NaN	NaN
NaN	NaN	NaN	NaN	NaN	NaN	153.7	NaN	-0.41	NaN	NaN	NaN	NaN	NaN	NaN	NaN	NaN	NaN	NaN	NaN	NaN
NaN	NaN	NaN	NaN	NaN	NaN	153.8	NaN	-0.31	NaN	NaN	NaN	NaN	NaN	NaN	NaN	NaN	NaN	NaN	NaN	NaN
NaN	NaN	NaN	NaN	NaN	NaN	153.89	NaN	-0.04	NaN	NaN	NaN	NaN	NaN	NaN	NaN	NaN	NaN	NaN	NaN	NaN
NaN	NaN	NaN	NaN	NaN	NaN	153.98	NaN	-0.26	NaN	NaN	NaN	NaN	NaN	NaN	NaN	NaN	NaN	NaN	NaN	NaN
NaN	NaN	NaN	NaN	NaN	NaN	154.07	NaN	-0.31	NaN	NaN	NaN	NaN	NaN	NaN	NaN	NaN	NaN	NaN	NaN	NaN
NaN	NaN	NaN	NaN	NaN	NaN	154.25	NaN	-0.16	NaN	NaN	NaN	NaN	NaN	NaN	NaN	NaN	NaN	NaN	NaN	NaN
NaN	NaN	NaN	NaN	NaN	NaN	154.36	NaN	-0.21	NaN	NaN	NaN	NaN	NaN	NaN	NaN	NaN	NaN	NaN	NaN	NaN
NaN	NaN	NaN	NaN	NaN	NaN	154.47	NaN	-0.07	NaN	NaN	NaN	NaN	NaN	NaN	NaN	NaN	NaN	NaN	NaN	NaN
NaN	NaN	NaN	NaN	NaN	NaN	154.61	NaN	-0.19	NaN	NaN	NaN	NaN	NaN	NaN	NaN	NaN	NaN	NaN	NaN	NaN
NaN	NaN	NaN	NaN	NaN	NaN	155.24	NaN	-0.27	NaN	NaN	NaN	NaN	NaN	NaN	NaN	NaN	NaN	NaN	NaN	NaN
NaN	NaN	NaN	NaN	NaN	NaN	155.47	NaN	-0.12	NaN	NaN	NaN	NaN	NaN	NaN	NaN	NaN	NaN	NaN	NaN	NaN
NaN	NaN	NaN	NaN	NaN	NaN	155.75	NaN	-0.09	NaN	NaN	NaN	NaN	NaN	NaN	NaN	NaN	NaN	NaN	NaN	NaN
NaN	NaN	NaN	NaN	NaN	NaN	155.83	NaN	-0.42	NaN	NaN	NaN	NaN	NaN	NaN	NaN	NaN	NaN	NaN	NaN	NaN
NaN	NaN	NaN	NaN	NaN	NaN	156.36	NaN	-0.23	NaN	NaN	NaN	NaN	NaN	NaN	NaN	NaN	NaN	NaN	NaN	NaN
NaN	NaN	NaN	NaN	NaN	NaN	156.36	NaN	-0.48	NaN	NaN	NaN	NaN	NaN	NaN	NaN	NaN	NaN	NaN	NaN	NaN
NaN	NaN	NaN	NaN	NaN	NaN	156.64	NaN	0.13	NaN	NaN	NaN	NaN	NaN	NaN	NaN	NaN	NaN	NaN	NaN	NaN
NaN	NaN	NaN	NaN	NaN	NaN	156.74	NaN	0.13	NaN	NaN	NaN	NaN	NaN	NaN	NaN	NaN	NaN	NaN	NaN	NaN
NaN	NaN	NaN	NaN	NaN	NaN	156.84	NaN	-0.12	NaN	NaN	NaN	NaN	NaN	NaN	NaN	NaN	NaN	NaN	NaN	NaN
NaN	NaN	NaN	NaN	NaN	NaN	156.94	NaN	0.03	NaN	NaN	NaN	NaN	NaN	NaN	NaN	NaN	NaN	NaN	NaN	NaN
NaN	NaN	NaN	NaN	NaN	NaN	156.94	NaN	-0.21	NaN	NaN	NaN	NaN	NaN	NaN	NaN	NaN	NaN	NaN	NaN	NaN
NaN	NaN	NaN	NaN	NaN	NaN	157.15	NaN	0.08	NaN	NaN	NaN	NaN	NaN	NaN	NaN	NaN	NaN	NaN	NaN	NaN
NaN	NaN	NaN	NaN	NaN	NaN	157.15	NaN	-0.15	NaN	NaN	NaN	NaN	NaN	NaN	NaN	NaN	NaN	NaN	NaN	NaN
NaN	NaN	NaN	NaN	NaN	NaN	157.25	NaN	-0.31	NaN	NaN	NaN	NaN	NaN	NaN	NaN	NaN	NaN	NaN	NaN	NaN
NaN	NaN	NaN	NaN	NaN	NaN	157.85	NaN	-0.08	NaN	NaN	NaN	NaN	NaN	NaN	NaN	NaN	NaN	NaN	NaN	NaN
NaN	NaN	NaN	NaN	NaN	NaN	158.15	NaN	-0.15	NaN	NaN	NaN	NaN	NaN	NaN	NaN	NaN	NaN	NaN	NaN	NaN
NaN	NaN	NaN	NaN	NaN	NaN	158.25	NaN	-0.22	NaN	NaN	NaN	NaN	NaN	NaN	NaN	NaN	NaN	NaN	NaN	NaN
NaN	NaN	NaN	NaN	NaN	NaN	158.64	NaN	-0.22	NaN	NaN	NaN	NaN	NaN	NaN	NaN	NaN	NaN	NaN	NaN	NaN
NaN	NaN	NaN	NaN	NaN	NaN	159.45	NaN	-0.31	NaN	NaN	NaN	NaN	NaN	NaN	NaN	NaN	NaN	NaN	NaN	NaN
NaN	NaN	NaN	NaN	NaN	NaN	159.76	NaN	-0.15	NaN	NaN	NaN	NaN	NaN	NaN	NaN	NaN	NaN	NaN	NaN	NaN
NaN	NaN	NaN	NaN	NaN	NaN	159.76	NaN	-0.15	NaN	NaN	NaN	NaN	NaN	NaN	NaN	NaN	NaN	NaN	NaN	NaN
NaN	NaN	NaN	NaN	NaN	NaN	159.92	NaN	0.01	NaN	NaN	NaN	NaN	NaN	NaN	NaN	NaN	NaN	NaN	NaN	NaN
NaN	NaN	NaN	NaN	NaN	NaN	160.06	NaN	-0.08	NaN	NaN	NaN	NaN	NaN	NaN	NaN	NaN	NaN	NaN	NaN	NaN
NaN	NaN	NaN	NaN	NaN	NaN	160.2	NaN	0.07	NaN	NaN	NaN	NaN	NaN	NaN	NaN	NaN	NaN	NaN	NaN	NaN
NaN	NaN	NaN	NaN	NaN	NaN	160.52	NaN	-0.5	NaN	NaN	NaN	NaN	NaN	NaN	NaN	NaN	NaN	NaN	NaN	NaN
NaN	NaN	NaN	NaN	NaN	NaN	160.52	NaN	-0.61	NaN	NaN	NaN	NaN	NaN	NaN	NaN	NaN	NaN	NaN	NaN	NaN
NaN	NaN	NaN	NaN	NaN	NaN	160.85	NaN	-0.31	NaN	NaN	NaN	NaN	NaN	NaN	NaN	NaN	NaN	NaN	NaN	NaN
NaN	NaN	NaN	NaN	NaN	NaN	160.98	NaN	-0.94	NaN	NaN	NaN	NaN	NaN	NaN	NaN	NaN	NaN	NaN	NaN	NaN
NaN	NaN	NaN	NaN	NaN	NaN	161.62	NaN	-0.39	NaN	NaN	NaN	NaN	NaN	NaN	NaN	NaN	NaN	NaN	NaN	NaN
NaN	NaN	NaN	NaN	NaN	NaN	161.69	NaN	-0.39	NaN	NaN	NaN	NaN	NaN	NaN	NaN	NaN	NaN	NaN	NaN	NaN
NaN	NaN	NaN	NaN	NaN	NaN	161.72	NaN	-0.44	NaN	NaN	NaN	NaN	NaN	NaN	NaN	NaN	NaN	NaN	NaN	NaN
NaN	NaN	NaN	NaN	NaN	NaN	161.75	NaN	-0.34	NaN	NaN	NaN	NaN	NaN	NaN	NaN	NaN	NaN	NaN	NaN	NaN
NaN	NaN	NaN	NaN	NaN	NaN	161.83	NaN	-0.43	NaN	NaN	NaN	NaN	NaN	NaN	NaN	NaN	NaN	NaN	NaN	NaN
NaN	NaN	NaN	NaN	NaN	NaN	161.86	NaN	-0.17	NaN	NaN	NaN	NaN	NaN	NaN	NaN	NaN	NaN	NaN	NaN	NaN
NaN	NaN	NaN	NaN	NaN	NaN	161.91	NaN	-0.84	NaN	NaN	NaN	NaN	NaN	NaN	NaN	NaN	NaN	NaN	NaN	NaN
NaN	NaN	NaN	NaN	NaN	NaN	161.93	NaN	0.46	NaN	NaN	NaN	NaN	NaN	NaN	NaN	NaN	NaN	NaN	NaN	NaN
NaN	NaN	NaN	NaN	NaN	NaN	161.93	NaN	-0.51	NaN	NaN	NaN	NaN	NaN	NaN	NaN	NaN	NaN	NaN	NaN	NaN
NaN	NaN	NaN	NaN	NaN	NaN	161.98	NaN	-0.36	NaN	NaN	NaN	NaN	NaN	NaN	NaN	NaN	NaN	NaN	NaN	NaN
NaN	NaN	NaN	NaN	NaN	NaN	162.17	NaN	-0.71	NaN	NaN	NaN	NaN	NaN	NaN	NaN	NaN	NaN	NaN	NaN	NaN
NaN	NaN	NaN	NaN	NaN	NaN	162.18	NaN	-0.3	NaN	NaN	NaN	NaN	NaN	NaN	NaN	NaN	NaN	NaN	NaN	NaN
NaN	NaN	NaN	NaN	NaN	NaN	162.41	NaN	-0.5	NaN	NaN	NaN	NaN	NaN	NaN	NaN	NaN	NaN	NaN	NaN	NaN
NaN	NaN	NaN	NaN	NaN	NaN	162.41	NaN	-0.23	NaN	NaN	NaN	NaN	NaN	NaN	NaN	NaN	NaN	NaN	NaN	NaN
NaN	NaN	NaN	NaN	NaN	NaN	162.62	NaN	-0.67	NaN	NaN	NaN	NaN	NaN	NaN	NaN	NaN	NaN	NaN	NaN	NaN
NaN	NaN	NaN	NaN	NaN	NaN	162.71	NaN	-0.17	NaN	NaN	NaN	NaN	NaN	NaN	NaN	NaN	NaN	NaN	NaN	NaN
NaN	NaN	NaN	NaN	NaN	NaN	162.8	NaN	-0.35	NaN	NaN	NaN	NaN	NaN	NaN	NaN	NaN	NaN	NaN	NaN	NaN
NaN	NaN	NaN	NaN	NaN	NaN	162.8	NaN	-0.09	NaN	NaN	NaN	NaN	NaN	NaN	NaN	NaN	NaN	NaN	NaN	NaN
NaN	NaN	NaN	NaN	NaN	NaN	163.12	NaN	-0.11	NaN	NaN	NaN	NaN	NaN	NaN	NaN	NaN	NaN	NaN	NaN	NaN
NaN	NaN	NaN	NaN	NaN	NaN	163.23	NaN	-0.41	NaN	NaN	NaN	NaN	NaN	NaN	NaN	NaN	NaN	NaN	NaN	NaN
NaN	NaN	NaN	NaN	NaN	NaN	163.57	NaN	-1.02	NaN	NaN	NaN	NaN	NaN	NaN	NaN	NaN	NaN	NaN	NaN	NaN
NaN	NaN	NaN	NaN	NaN	NaN	163.66	NaN	-0.33	NaN	NaN	NaN	NaN	NaN	NaN	NaN	NaN	NaN	NaN	NaN	NaN
NaN	NaN	NaN	NaN	NaN	NaN	163.66	NaN	-0.29	NaN	NaN	NaN	NaN	NaN	NaN	NaN	NaN	NaN	NaN	NaN	NaN
NaN	NaN	NaN	NaN	NaN	NaN	163.75	NaN	-0.44	NaN	NaN	NaN	NaN	NaN	NaN	NaN	NaN	NaN	NaN	NaN	NaN
NaN	NaN	NaN	NaN	NaN	NaN	163.84	NaN	-0.49	NaN	NaN	NaN	NaN	NaN	NaN	NaN	NaN	NaN	NaN	NaN	NaN
NaN	NaN	NaN	NaN	NaN	NaN	164.15	NaN	-0.28	NaN	NaN	NaN	NaN	NaN	NaN	NaN	NaN	NaN	NaN	NaN	NaN
NaN	NaN	NaN	NaN	NaN	NaN	164.77	NaN	-0.19	NaN	NaN	NaN	NaN	NaN	NaN	NaN	NaN	NaN	NaN	NaN	NaN
NaN	NaN	NaN	NaN	NaN	NaN	165.15	NaN	-0.17	NaN	NaN	NaN	NaN	NaN	NaN	NaN	NaN	NaN	NaN	NaN	NaN
NaN	NaN	NaN	NaN	NaN	NaN	165.35	NaN	-0.24	NaN	NaN	NaN	NaN	NaN	NaN	NaN	NaN	NaN	NaN	NaN	NaN
NaN	NaN	NaN	NaN	NaN	NaN	166.05	NaN	-0.38	NaN	NaN	NaN	NaN	NaN	NaN	NaN	NaN	NaN	NaN	NaN	NaN
NaN	NaN	NaN	NaN	NaN	NaN	166.15	NaN	-0.22	NaN	NaN	NaN	NaN	NaN	NaN	NaN	NaN	NaN	NaN	NaN	NaN
NaN	NaN	NaN	NaN	NaN	NaN	166.25	NaN	-0.26	NaN	NaN	NaN	NaN	NaN	NaN	NaN	NaN	NaN	NaN	NaN	NaN
NaN	NaN	NaN	NaN	NaN	NaN	166.35	NaN	-0.76	NaN	NaN	NaN	NaN	NaN	NaN	NaN	NaN	NaN	NaN	NaN	NaN
NaN	NaN	NaN	NaN	NaN	NaN	166.55	NaN	-0.91	NaN	NaN	NaN	NaN	NaN	NaN	NaN	NaN	NaN	NaN	NaN	NaN
NaN	NaN	NaN	NaN	NaN	NaN	166.55	NaN	-0.43	NaN	NaN	NaN	NaN	NaN	NaN	NaN	NaN	NaN	NaN	NaN	NaN
NaN	NaN	NaN	NaN	NaN	NaN	166.64	NaN	-0.42	NaN	NaN	NaN	NaN	NaN	NaN	NaN	NaN	NaN	NaN	NaN	NaN
NaN	NaN	NaN	NaN	NaN	NaN	166.75	NaN	-0.08	NaN	NaN	NaN	NaN	NaN	NaN	NaN	NaN	NaN	NaN	NaN	NaN
NaN	NaN	NaN	NaN	NaN	NaN	166.85	NaN	-0.62	NaN	NaN	NaN	NaN	NaN	NaN	NaN	NaN	NaN	NaN	NaN	NaN
NaN	NaN	NaN	NaN	NaN	NaN	166.85	NaN	-0.11	NaN	NaN	NaN	NaN	NaN	NaN	NaN	NaN	NaN	NaN	NaN	NaN
NaN	NaN	NaN	NaN	NaN	NaN	166.95	NaN	-0.76	NaN	NaN	NaN	NaN	NaN	NaN	NaN	NaN	NaN	NaN	NaN	NaN
NaN	NaN	NaN	NaN	NaN	NaN	166.95	NaN	-0.22	NaN	NaN	NaN	NaN	NaN	NaN	NaN	NaN	NaN	NaN	NaN	NaN
NaN	NaN	NaN	NaN	NaN	NaN	166.95	NaN	-0.18	NaN	NaN	NaN	NaN	NaN	NaN	NaN	NaN	NaN	NaN	NaN	NaN
NaN	NaN	NaN	NaN	NaN	NaN	166.95	NaN	-0.24	NaN	NaN	NaN	NaN	NaN	NaN	NaN	NaN	NaN	NaN	NaN	NaN
NaN	NaN	NaN	NaN	NaN	NaN	167.35	NaN	-0.18	NaN	NaN	NaN	NaN	NaN	NaN	NaN	NaN	NaN	NaN	NaN	NaN
NaN	NaN	NaN	NaN	NaN	NaN	167.45	NaN	-0.09	NaN	NaN	NaN	NaN	NaN	NaN	NaN	NaN	NaN	NaN	NaN	NaN
NaN	NaN	NaN	NaN	NaN	NaN	167.55	NaN	-0.13	NaN	NaN	NaN	NaN	NaN	NaN	NaN	NaN	NaN	NaN	NaN	NaN
NaN	NaN	NaN	NaN	NaN	NaN	167.65	NaN	-0.44	NaN	NaN	NaN	NaN	NaN	NaN	NaN	NaN	NaN	NaN	NaN	NaN
NaN	NaN	NaN	NaN	NaN	NaN	167.65	NaN	0.03	NaN	NaN	NaN	NaN	NaN	NaN	NaN	NaN	NaN	NaN	NaN	NaN
NaN	NaN	NaN	NaN	NaN	NaN	167.75	NaN	0.01	NaN	NaN	NaN	NaN	NaN	NaN	NaN	NaN	NaN	NaN	NaN	NaN
NaN	NaN	NaN	NaN	NaN	NaN	167.85	NaN	-0.12	NaN	NaN	NaN	NaN	NaN	NaN	NaN	NaN	NaN	NaN	NaN	NaN
NaN	NaN	NaN	NaN	NaN	NaN	168.35	NaN	-0.29	NaN	NaN	NaN	NaN	NaN	NaN	NaN	NaN	NaN	NaN	NaN	NaN
NaN	NaN	NaN	NaN	NaN	NaN	168.35	NaN	0.08	NaN	NaN	NaN	NaN	NaN	NaN	NaN	NaN	NaN	NaN	NaN	NaN
NaN	NaN	NaN	NaN	NaN	NaN	168.45	NaN	-0.22	NaN	NaN	NaN	NaN	NaN	NaN	NaN	NaN	NaN	NaN	NaN	NaN
NaN	NaN	NaN	NaN	NaN	NaN	168.45	NaN	-0.14	NaN	NaN	NaN	NaN	NaN	NaN	NaN	NaN	NaN	NaN	NaN	NaN
NaN	NaN	NaN	NaN	NaN	NaN	168.56	NaN	-0.55	NaN	NaN	NaN	NaN	NaN	NaN	NaN	NaN	NaN	NaN	NaN	NaN
NaN	NaN	NaN	NaN	NaN	NaN	168.75	NaN	0.11	NaN	NaN	NaN	NaN	NaN	NaN	NaN	NaN	NaN	NaN	NaN	NaN
NaN	NaN	NaN	NaN	NaN	NaN	168.85	NaN	-0.59	NaN	NaN	NaN	NaN	NaN	NaN	NaN	NaN	NaN	NaN	NaN	NaN
NaN	NaN	NaN	NaN	NaN	NaN	168.94	NaN	0.71	NaN	NaN	NaN	NaN	NaN	NaN	NaN	NaN	NaN	NaN	NaN	NaN
NaN	NaN	NaN	NaN	NaN	NaN	168.94	NaN	-0.21	NaN	NaN	NaN	NaN	NaN	NaN	NaN	NaN	NaN	NaN	NaN	NaN
NaN	NaN	NaN	NaN	NaN	NaN	168.94	NaN	-0.68	NaN	NaN	NaN	NaN	NaN	NaN	NaN	NaN	NaN	NaN	NaN	NaN
NaN	NaN	NaN	NaN	NaN	NaN	168.94	NaN	-0.95	NaN	NaN	NaN	NaN	NaN	NaN	NaN	NaN	NaN	NaN	NaN	NaN
NaN	NaN	NaN	NaN	NaN	NaN	169.04	NaN	0	NaN	NaN	NaN	NaN	NaN	NaN	NaN	NaN	NaN	NaN	NaN	NaN
NaN	NaN	NaN	NaN	NaN	NaN	169.15	NaN	-0.88	NaN	NaN	NaN	NaN	NaN	NaN	NaN	NaN	NaN	NaN	NaN	NaN
NaN	NaN	NaN	NaN	NaN	NaN	169.15	NaN	-0.07	NaN	NaN	NaN	NaN	NaN	NaN	NaN	NaN	NaN	NaN	NaN	NaN
NaN	NaN	NaN	NaN	NaN	NaN	169.15	NaN	-1.11	NaN	NaN	NaN	NaN	NaN	NaN	NaN	NaN	NaN	NaN	NaN	NaN
NaN	NaN	NaN	NaN	NaN	NaN	169.45	NaN	0.1	NaN	NaN	NaN	NaN	NaN	NaN	NaN	NaN	NaN	NaN	NaN	NaN
NaN	NaN	NaN	NaN	NaN	NaN	169.45	NaN	-0.02	NaN	NaN	NaN	NaN	NaN	NaN	NaN	NaN	NaN	NaN	NaN	NaN
NaN	NaN	NaN	NaN	NaN	NaN	169.55	NaN	-0.22	NaN	NaN	NaN	NaN	NaN	NaN	NaN	NaN	NaN	NaN	NaN	NaN
NaN	NaN	NaN	NaN	NaN	NaN	169.55	NaN	-0.09	NaN	NaN	NaN	NaN	NaN	NaN	NaN	NaN	NaN	NaN	NaN	NaN
NaN	NaN	NaN	NaN	NaN	NaN	169.75	NaN	-0.86	NaN	NaN	NaN	NaN	NaN	NaN	NaN	NaN	NaN	NaN	NaN	NaN
NaN	NaN	NaN	NaN	NaN	NaN	169.85	NaN	-0.21	NaN	NaN	NaN	NaN	NaN	NaN	NaN	NaN	NaN	NaN	NaN	NaN
NaN	NaN	NaN	NaN	NaN	NaN	169.85	NaN	-0.21	NaN	NaN	NaN	NaN	NaN	NaN	NaN	NaN	NaN	NaN	NaN	NaN
NaN	NaN	NaN	NaN	NaN	NaN	169.95	NaN	-0.24	NaN	NaN	NaN	NaN	NaN	NaN	NaN	NaN	NaN	NaN	NaN	NaN
NaN	NaN	NaN	NaN	NaN	NaN	169.95	NaN	-0.36	NaN	NaN	NaN	NaN	NaN	NaN	NaN	NaN	NaN	NaN	NaN	NaN
NaN	NaN	NaN	NaN	NaN	NaN	170.05	NaN	-0.28	NaN	NaN	NaN	NaN	NaN	NaN	NaN	NaN	NaN	NaN	NaN	NaN
NaN	NaN	NaN	NaN	NaN	NaN	170.15	NaN	-0.13	NaN	NaN	NaN	NaN	NaN	NaN	NaN	NaN	NaN	NaN	NaN	NaN
NaN	NaN	NaN	NaN	NaN	NaN	170.25	NaN	-0.26	NaN	NaN	NaN	NaN	NaN	NaN	NaN	NaN	NaN	NaN	NaN	NaN
NaN	NaN	NaN	NaN	NaN	NaN	170.35	NaN	-0.22	NaN	NaN	NaN	NaN	NaN	NaN	NaN	NaN	NaN	NaN	NaN	NaN
NaN	NaN	NaN	NaN	NaN	NaN	170.46	NaN	-0.25	NaN	NaN	NaN	NaN	NaN	NaN	NaN	NaN	NaN	NaN	NaN	NaN
NaN	NaN	NaN	NaN	NaN	NaN	170.56	NaN	-0.35	NaN	NaN	NaN	NaN	NaN	NaN	NaN	NaN	NaN	NaN	NaN	NaN
NaN	NaN	NaN	NaN	NaN	NaN	170.66	NaN	-0.61	NaN	NaN	NaN	NaN	NaN	NaN	NaN	NaN	NaN	NaN	NaN	NaN
NaN	NaN	NaN	NaN	NaN	NaN	170.85	NaN	-0.15	NaN	NaN	NaN	NaN	NaN	NaN	NaN	NaN	NaN	NaN	NaN	NaN
NaN	NaN	NaN	NaN	NaN	NaN	170.95	NaN	-1.01	NaN	NaN	NaN	NaN	NaN	NaN	NaN	NaN	NaN	NaN	NaN	NaN
NaN	NaN	NaN	NaN	NaN	NaN	171.06	NaN	-0.2	NaN	NaN	NaN	NaN	NaN	NaN	NaN	NaN	NaN	NaN	NaN	NaN
NaN	NaN	NaN	NaN	NaN	NaN	171.06	NaN	-0.86	NaN	NaN	NaN	NaN	NaN	NaN	NaN	NaN	NaN	NaN	NaN	NaN
[truncated: 1,054 more rows]
