# Supplementary material for: Deglacial carbon cycle changes observed in a compilation of 117 benthic δ 13 C time series (20–6 ka)
Source: Copernicus journal article supplement (doi:10.5194/cp-2018-25), 2018-03-15
Supplement: Supplementary file 6 [file DSA_xyz.xls]

## Sheet: DSA_xyz
	Latitude	Longitude	Depth (m)
GeoB1041	-0.2	-23.15	3706
GeoB1112	-3.48	-7.6	4033
GeoB1117	-5.78	-10.75	3125
GeoB1118	-3.82	-14.9	3984
GeoB1211	-3.56	-16.43	4675
GeoB1214	-24.47	7.54	4089
GeoB1710	-24.69	7.24	3210
MD07-3076	-23.43	11.7	2987
ODP1089	-44.15	-14.23	3770
ODP1090_TTN057-6	-40.94	9.89	4621
PS2498	-42.91	8.9	3702
RC16-84	-44.15	-14.23	3783
RC13-228	-22.33	11.2	3204
V24-253	-19.7	8.88	2675
