# Supplementary material for: Deglacial carbon cycle changes observed in a compilation of 117 benthic δ 13 C time series (20–6 ka)
Source: Copernicus journal article supplement (doi:10.5194/cp-2018-25), 2018-03-15
Supplement: Supplementary file 7 [file II_sites.xls]

## Sheet: II_sites
GeoB3004			MD01-2378
0.03	3.0219	0.19	0.06	2.2629	0.59
0.08	4.7709	-0.16	0.26	2.7694	0.58
0.13	6.0032	-0.19	0.36	3.0583	0.56
0.18	6.8661	-0.06	0.46	3.354	0.52
0.23	8.1506	0.03	0.56	3.633	0.59
0.28	9.3247	0.07	0.66	3.9003	0.63
0.33	10.467	-0.08	0.76	4.1542	0.54
0.38	11.254	-0.02	0.86	4.3671	0.56
0.43	11.833	0.04	0.96	4.621	0.53
0.48	12.152	0.08	1.06	4.938	0.62
0.53	12.382	0.02	1.16	5.2721	0.56
0.58	12.731	-0.1	1.26	5.5483	0.65
0.63	13.123	0.03	1.36	5.8229	0.53
0.68	13.511	-0.1	1.46	6.127	0.51
0.73	13.894	-0.08	1.53	6.3363	0.21
0.78	14.362	0.15	1.63	6.6691	0.5
0.83	15.05	0.05	1.73	7.0931	0.39
0.88	15.758	-0.14	1.83	7.5769	0.44
0.93	16.546	-0.02	1.93	8.0526	0.3
0.98	17.309	-0.08	2.03	8.569	0.44
1.03	17.981	-0.13	2.13	9.1016	0.45
1.08	18.628	-0.08	2.23	9.6751	0.17
1.13	19.434	-0.09	2.33	10.401	0.26
1.18	20.02	-0.05	2.43	11.147	0.34
1.23	20.598	-0.11	2.53	11.718	0.39
1.28	21.252	-0.07	2.63	12.164	0.28
1.33	22.008	-0.03	2.73	12.445	0.3
1.38	22.73	-0.19	2.83	12.941	0.23
1.43	23.414	0.05	2.93	13.533	0.31
1.48	24.108	-0.08	3.02	14.057	0.29
1.53	24.859	0.03	3.12	14.678	0.26
1.63	26.418	-0.32	3.22	15.308	0.25
1.68	27.22	0.01	3.32	15.922	0.15
1.73	27.887	-0.17	3.42	16.508	0.11
1.78	28.551	NaN	3.52	17.052	0.16
1.83	29.229	0.03	3.62	17.495	0.1
1.88	29.951	0.05	3.72	17.908	0.08
1.93	30.734	-0.04	3.82	18.3	0.09
1.98	31.535	0.12	3.92	18.75	0.08
2.03	32.342	-0.03	4.02	19.285	0.08
2.08	32.992	0.03	4.12	19.695	0.11
2.13	33.71	NaN	4.22	20.142	0.06
2.18	34.46	-0.04	4.32	20.592	0.1
2.23	35.457	-0.02	4.42	21.082	0.18
2.28	36.222	-0.01	4.51	21.702	0.08
2.33	36.894	-0.08	4.61	22.421	0.13
2.38	37.523	0.03	4.71	23.112	0.13
2.43	38.322	0.14	4.81	23.785	0.15
2.48	38.974	0	4.91	24.549	0.18
2.53	39.609	0.12	5.01	25.332	0.13
2.58	40.319	0.11	5.11	26.15	0.19
2.63	40.963	0.11	5.21	27.082	0.15
2.68	41.489	0	5.31	28.056	0.08
2.73	41.978	0.05	5.41	28.977	0.26
2.78	42.465	0.13	5.51	29.934	0.26
2.83	42.915	-0.22	5.61	31.081	0.2
2.88	NaN	-0.12	5.71	32.26	0.21
2.93	NaN	-0.06	5.81	33.112	0.29
2.98	NaN	-0.06	5.91	34.047	0.27
3.03	NaN	0.21	6.01	35.104	0.24
3.08	NaN	-0.22	6.11	35.923	0.25
3.13	NaN	0.06	6.21	36.523	0.33
3.18	NaN	-0.03	6.31	37.114	0.29
3.23	NaN	0.01	6.41	37.79	0.28
3.28	NaN	0.02	6.51	38.53	0.26
3.33	NaN	-0.02	6.61	39.372	0.23
3.38	NaN	NaN	6.71	40.528	0.23
3.43	NaN	-0.28	6.81	41.468	0.27
3.48	NaN	-0.08	6.91	42.191	0.21
3.53	NaN	-0.24	7.01	42.778	0.23
3.58	NaN	-0.06	7.11	NaN	0.24
3.63	NaN	-0.17	7.21	NaN	0.27
3.68	NaN	0.16	7.31	NaN	0.23
3.73	NaN	0.06	7.41	NaN	0.3
3.78	NaN	-0.06	7.51	NaN	0.25
3.83	NaN	0	7.61	NaN	0.23
3.88	NaN	-0.13	7.71	NaN	0.35
3.93	NaN	-0.45	7.81	NaN	0.23
3.98	NaN	-0.24	7.91	NaN	0.28
4.03	NaN	-0.21	8.01	NaN	0.21
4.08	NaN	-0.15	8.11	NaN	0.07
4.13	NaN	-0.07	8.21	NaN	0.18
4.18	NaN	0.1	8.31	NaN	0.13
4.23	NaN	0.09	8.41	NaN	0.11
4.28	NaN	-0.18	8.51	NaN	0.07
4.33	NaN	-0.02	8.61	NaN	0.08
4.38	NaN	-0.14	8.71	NaN	0.07
4.43	NaN	-0.16	8.81	NaN	0.06
4.48	NaN	-0.19	8.91	NaN	0.04
4.53	NaN	-0.04	9.01	NaN	-0.1
4.58	NaN	-0.01	9.11	NaN	-0.03
4.63	NaN	-0.23	9.21	NaN	0.05
4.68	NaN	-0.12	9.31	NaN	0.04
4.73	NaN	-0.15	9.41	NaN	0
4.78	NaN	-0.19	9.51	NaN	0.13
4.83	NaN	-0.1	9.61	NaN	-0.01
4.88	NaN	-0.08	9.71	NaN	0.16
4.93	NaN	-0.14	9.81	NaN	0.19
4.98	NaN	-0.27	9.91	NaN	0.1
5.03	NaN	0.02	10.01	NaN	0.24
5.08	NaN	0.08	10.11	NaN	0.37
5.13	NaN	0.06	10.21	NaN	0.39
5.18	NaN	0.11	10.31	NaN	0.39
5.23	NaN	0.09	10.41	NaN	0.45
5.28	NaN	0.03	10.51	NaN	0.49
5.33	NaN	-0.11	10.71	NaN	0.44
5.38	NaN	0.02	10.81	NaN	0.37
5.43	NaN	0.01	10.91	NaN	0.31
5.48	NaN	0.03	11.01	NaN	0.35
5.53	NaN	0.02	11.11	NaN	0.35
5.58	NaN	-0.08	11.21	NaN	0.34
5.63	NaN	0.09	11.31	NaN	0.38
5.68	NaN	-0.11	11.41	NaN	0.36
5.73	NaN	0.09	11.51	NaN	0.38
5.78	NaN	0.07	11.61	NaN	0.38
5.83	NaN	0.04	11.71	NaN	0.32
5.88	NaN	0.06	11.81	NaN	0.29
5.93	NaN	0.07	11.91	NaN	0.37
5.98	NaN	-0.03	12	NaN	0.38
6.03	NaN	-0.03	12.1	NaN	0.12
6.08	NaN	0.08	12.2	NaN	0.32
6.13	NaN	0.01	12.3	NaN	0.25
6.18	NaN	-0.06	12.4	NaN	0.22
6.23	NaN	-0.11	12.5	NaN	0.21
6.28	NaN	-0.21	12.6	NaN	0.26
6.33	NaN	-0.26	12.7	NaN	0.21
6.38	NaN	0.07	12.8	NaN	0.24
6.43	NaN	-0.03	12.9	NaN	0.17
6.48	NaN	0.1	13	NaN	0.16
6.53	NaN	-0.02	13.1	NaN	0.28
6.58	NaN	-0.27	13.2	NaN	0.13
6.63	NaN	-0.01	13.3	NaN	0.23
6.68	NaN	-0.2	13.4	NaN	0.32
6.73	NaN	-0.12	13.5	NaN	0.28
6.78	NaN	-0.31	13.6	NaN	0.22
6.83	NaN	-0.21	13.7	NaN	-0.03
6.88	NaN	-0.07	13.8	NaN	-0.04
6.93	NaN	-0.31	13.9	NaN	0.14
6.98	NaN	-0.17	14	NaN	-0.08
7.03	NaN	-0.24	14.1	NaN	0.1
7.08	NaN	-0.26	14.2	NaN	0.06
7.13	NaN	-0.33	14.3	NaN	-0.02
7.18	NaN	-0.22	14.4	NaN	-0.13
7.23	NaN	-0.12	14.5	NaN	-0.13
7.28	NaN	-0.16	14.6	NaN	-0.07
7.33	NaN	-0.3	14.7	NaN	-0.22
7.38	NaN	NaN	14.8	NaN	-0.22
7.43	NaN	-0.17	14.9	NaN	-0.17
7.48	NaN	-0.02	15	NaN	-0.16
7.53	NaN	0.13	15.1	NaN	-0.11
7.58	NaN	-0.16	15.2	NaN	-0.16
7.63	NaN	-0.19	15.3	NaN	-0.18
7.68	NaN	-0.1	15.4	NaN	-0.2
7.73	NaN	-0.13	15.5	NaN	-0.16
7.78	NaN	-0.25	15.6	NaN	-0.09
7.83	NaN	-0.2	15.7	NaN	-0.1
7.88	NaN	-0.34	15.8	NaN	-0.07
7.93	NaN	-0.24	15.9	NaN	-0.24
7.98	NaN	-0.22	16	NaN	-0.18
8.03	NaN	-0.21	16.1	NaN	-0.16
8.08	NaN	-0.17	16.2	NaN	-0.15
8.13	NaN	-0.12	16.3	NaN	-0.28
8.18	NaN	-0.01	16.4	NaN	-0.15
8.23	NaN	-0.2	16.49	NaN	NaN
8.28	NaN	-0.43	16.69	NaN	-0.09
8.33	NaN	-0.29	16.89	NaN	-0.19
8.38	NaN	NaN	17.09	NaN	-0.2
8.43	NaN	-0.23	17.29	NaN	-0.16
8.48	NaN	-0.27	17.49	NaN	-0.18
8.53	NaN	-0.23	17.69	NaN	NaN
8.58	NaN	-0.48	17.89	NaN	-0.16
8.63	NaN	-0.12	17.99	NaN	-0.17
8.68	NaN	-0.13	18.19	NaN	-0.06
8.73	NaN	-0.25	18.39	NaN	0.06
8.78	NaN	-0.29	18.59	NaN	0.19
8.83	NaN	-0.24	18.79	NaN	0.28
8.88	NaN	NaN	18.99	NaN	0.28
8.93	NaN	-0.21	19.19	NaN	0.31
8.98	NaN	-0.26	19.39	NaN	NaN
9.03	NaN	-0.32	19.47	NaN	NaN
9.08	NaN	-0.23	19.67	NaN	0.26
9.13	NaN	-0.39	19.87	NaN	0.04
9.18	NaN	-0.25	20.07	NaN	0.04
9.23	NaN	-0.38	20.27	NaN	0.03
9.28	NaN	-0.4	20.47	NaN	-0.06
9.33	NaN	-0.44	20.67	NaN	-0.05
9.38	NaN	-0.34	20.87	NaN	-0.04
9.43	NaN	-0.27	20.97	NaN	0.01
9.48	NaN	-0.2	21.17	NaN	-0.05
9.53	NaN	-0.38	21.37	NaN	0.08
9.58	NaN	NaN	21.57	NaN	0.11
9.63	NaN	-0.24	21.77	NaN	0.08
9.68	NaN	-0.37	21.97	NaN	0.15
9.73	NaN	-0.29	22.17	NaN	0.19
9.78	NaN	-0.34	22.37	NaN	-0.16
9.83	NaN	-0.12	22.48	NaN	-0.09
9.88	NaN	-0.31	22.68	NaN	-0.15
9.93	NaN	NaN	22.88	NaN	-0.23
9.98	NaN	-0.37	23.08	NaN	-0.25
10.03	NaN	-0.35	23.28	NaN	-0.22
10.08	NaN	-0.32	23.48	NaN	-0.28
10.13	NaN	-0.31	23.68	NaN	-0.3
NaN	NaN	NaN	23.88	NaN	-0.3
NaN	NaN	NaN	23.98	NaN	-0.34
NaN	NaN	NaN	24.18	NaN	-0.28
NaN	NaN	NaN	24.38	NaN	-0.29
NaN	NaN	NaN	24.58	NaN	-0.28
NaN	NaN	NaN	24.78	NaN	-0.3
NaN	NaN	NaN	24.98	NaN	-0.35
NaN	NaN	NaN	25.18	NaN	NaN
NaN	NaN	NaN	25.46	NaN	-0.13
NaN	NaN	NaN	25.66	NaN	-0.06
NaN	NaN	NaN	25.87	NaN	0.04
NaN	NaN	NaN	26.06	NaN	0.04
NaN	NaN	NaN	26.26	NaN	0.04
NaN	NaN	NaN	26.46	NaN	0.05
NaN	NaN	NaN	26.66	NaN	0.13
NaN	NaN	NaN	26.87	NaN	-0.11
NaN	NaN	NaN	26.96	NaN	-0.13
NaN	NaN	NaN	27.16	NaN	-0.08
NaN	NaN	NaN	27.37	NaN	-0.18
NaN	NaN	NaN	27.56	NaN	-0.15
NaN	NaN	NaN	27.76	NaN	-0.05
NaN	NaN	NaN	27.96	NaN	-0.04
NaN	NaN	NaN	28.16	NaN	0
NaN	NaN	NaN	28.37	NaN	0.02
NaN	NaN	NaN	28.46	NaN	0.02
NaN	NaN	NaN	28.66	NaN	0.11
NaN	NaN	NaN	28.87	NaN	0.09
NaN	NaN	NaN	29.06	NaN	0.01
NaN	NaN	NaN	29.26	NaN	0
NaN	NaN	NaN	29.46	NaN	0.12
NaN	NaN	NaN	29.66	NaN	0.22
NaN	NaN	NaN	29.87	NaN	0.01
NaN	NaN	NaN	29.96	NaN	0.02
NaN	NaN	NaN	30.16	NaN	-0.03
NaN	NaN	NaN	30.37	NaN	-0.06
NaN	NaN	NaN	30.56	NaN	-0.04
NaN	NaN	NaN	30.76	NaN	-0.13
NaN	NaN	NaN	30.96	NaN	-0.36
NaN	NaN	NaN	31.16	NaN	-0.42
NaN	NaN	NaN	31.37	NaN	-0.34
NaN	NaN	NaN	31.46	NaN	-0.39
NaN	NaN	NaN	31.66	NaN	-0.35
NaN	NaN	NaN	31.87	NaN	-0.35
NaN	NaN	NaN	32.06	NaN	-0.31
NaN	NaN	NaN	32.26	NaN	-0.31
NaN	NaN	NaN	32.46	NaN	-0.39
NaN	NaN	NaN	32.66	NaN	-0.32
NaN	NaN	NaN	32.86	NaN	-0.44
NaN	NaN	NaN	32.96	NaN	-0.27
NaN	NaN	NaN	33.16	NaN	-0.24
NaN	NaN	NaN	33.36	NaN	-0.19
NaN	NaN	NaN	33.56	NaN	-0.24
NaN	NaN	NaN	33.76	NaN	-0.27
NaN	NaN	NaN	33.96	NaN	-0.31
NaN	NaN	NaN	34.16	NaN	-0.17
NaN	NaN	NaN	34.36	NaN	-0.11
NaN	NaN	NaN	34.46	NaN	-0.25
NaN	NaN	NaN	34.66	NaN	-0.01
NaN	NaN	NaN	34.86	NaN	0
NaN	NaN	NaN	35.06	NaN	0.03
NaN	NaN	NaN	35.26	NaN	-0.05
NaN	NaN	NaN	35.46	NaN	0
NaN	NaN	NaN	35.66	NaN	-0.03
NaN	NaN	NaN	35.86	NaN	0.36
NaN	NaN	NaN	35.96	NaN	0.33
NaN	NaN	NaN	36.06	NaN	0.49
NaN	NaN	NaN	36.16	NaN	0.48
NaN	NaN	NaN	36.26	NaN	0.39
NaN	NaN	NaN	36.36	NaN	0.44
NaN	NaN	NaN	36.46	NaN	0.39
NaN	NaN	NaN	36.56	NaN	0.29
NaN	NaN	NaN	36.66	NaN	0.35
NaN	NaN	NaN	36.76	NaN	0.26
NaN	NaN	NaN	36.86	NaN	0.27
NaN	NaN	NaN	36.96	NaN	0.35
NaN	NaN	NaN	37.06	NaN	0.27
NaN	NaN	NaN	37.16	NaN	0.21
NaN	NaN	NaN	37.26	NaN	0.18
NaN	NaN	NaN	37.36	NaN	0.07
NaN	NaN	NaN	37.46	NaN	0.04
NaN	NaN	NaN	37.56	NaN	-0.06
NaN	NaN	NaN	37.66	NaN	-0.15
NaN	NaN	NaN	37.76	NaN	-0.08
NaN	NaN	NaN	37.86	NaN	-0.03
NaN	NaN	NaN	37.96	NaN	-0.13
NaN	NaN	NaN	38.06	NaN	-0.25
NaN	NaN	NaN	38.26	NaN	-0.41
NaN	NaN	NaN	38.46	NaN	-0.4
NaN	NaN	NaN	38.66	NaN	-0.43
NaN	NaN	NaN	38.86	NaN	-0.36
NaN	NaN	NaN	38.96	NaN	-0.4
NaN	NaN	NaN	39.16	NaN	-0.34
NaN	NaN	NaN	39.36	NaN	-0.34
NaN	NaN	NaN	39.56	NaN	-0.38
NaN	NaN	NaN	39.76	NaN	-0.39
NaN	NaN	NaN	39.96	NaN	-0.34
NaN	NaN	NaN	40.16	NaN	-0.29
NaN	NaN	NaN	40.36	NaN	-0.24
NaN	NaN	NaN	40.46	NaN	-0.35
