# Supplementary material for: Deglacial carbon cycle changes observed in a compilation of 117 benthic δ 13 C time series (20–6 ka)
Source: Copernicus journal article supplement (doi:10.5194/cp-2018-25), 2018-03-15
Supplement: Supplementary file 8 [file II_xyz.xls]

## Sheet: II_xyz
	Latitude	Longitude	Depth (m)
GeoB3004	14.61	52.92	1803
MD01-2378	-13.08	121.79	1783
