# Supplementary material for: Deglacial carbon cycle changes observed in a compilation of 117 benthic δ 13 C time series (20–6 ka)
Source: Copernicus journal article supplement (doi:10.5194/cp-2018-25), 2018-03-15
Supplement: Supplementary file 10 [file INA_xyz.xls]

## Sheet: INA_xyz
	Latitude	Longitude	Depth (m)
DSDP502	26.07	-78.07	965
GeoB6718	28.89	-13.23	1358
GIK15666-6	35.65	-8.06	1765
GIK16006-1	29.98	-10.65	1512
GIK16017	21.24	-18.06	1500
OCE205-103GGC	54.96	-19.76	1491
GeoB4240	64.8	-29.6	1893
GIK11944-2	12.09	-61.24	1299
GIK16004	57.51	-15.85	1134
GIK16030	60.4	-23.64	1984
GIK23419	61	-24	1650
GIK23519	11.65	-80.13	1750
M35003-4	64.78	-29.57	1855
ODP982	-3.67	-37.72	767
ODP983	-4	10	1000
ODP984	-29.92	-35.66	2340
V28-127	-36.27	19.48	2488
V28-14	-41.14	13.56	2082
