# Supplementary material for: Deglacial carbon cycle changes observed in a compilation of 117 benthic δ 13 C time series (20–6 ka)
Source: Copernicus journal article supplement (doi:10.5194/cp-2018-25), 2018-03-15
Supplement: Supplementary file 11 [file IP_xyz.xls]

## Sheet: IP_xyz
	Latitude	Longitude	Depth (m)
MD97-2151	8.73	109.87	1598
FR97-GC12	-23.57	153.78	990
V19-27	-0.47	-82.07	1373
EW9504-05	32.48	-118.13	1818
GIK17961-2	8.51	112.33	1795
MD97-2120	-45.53	174.93	1210
