# Supplementary material for: Deglacial carbon cycle changes observed in a compilation of 117 benthic δ 13 C time series (20–6 ka)
Source: Copernicus journal article supplement (doi:10.5194/cp-2018-25), 2018-03-15
Supplement: Supplementary file 12 [file IPac_sites.xls]

## Sheet: IPac_sites
MD97-2151			FR97-GC12			V19-27			EW9504-05			GIK17961-2			MD97-2120
0.035	1.5398	0.084	0.05	NaN	1.0513	0.05	NaN	0.01	0.02	2.422	-0.45	0.1	NaN	0.22	0.225	2.3955	0.99526
0.115	1.765	0.208	0.1	NaN	1.0945	0.085	NaN	NaN	0.08	3.7653	-0.23	0.2	2.1013	0.15	0.245	2.5016	0.98557
0.155	1.8776	0.087	0.15	NaN	1.1445	0.095	NaN	NaN	0.1	4.2051	-0.1	0.3	3.7382	0.15	0.265	2.6077	0.95412
0.235	2.0622	0.058	0.2	NaN	1.2385	0.1	NaN	0.26	0.16	5.6085	-0.25	0.4	5.4833	0.05	0.285	2.7138	0.97046
0.275	2.1523	0.188	0.3	NaN	1.1824	0.12	NaN	0.05	0.2	6.1556	-0.17	0.8	11.733	0.05	0.305	2.8275	1.0219
0.315	2.2424	0.223	0.4	2.1122	0.96	0.155	NaN	NaN	0.28	7.3418	-0.59	0.9	12.703	-0.03	0.325	2.9637	0.92676
0.355	2.3139	0.019	0.5	3.2221	0.8388	0.16	NaN	0.37	0.3	7.6989	-0.4	1.1	15.275	-0.06	0.345	3.0999	0.98791
0.435	2.4461	0.064	0.6	4.3635	0.8566	0.205	NaN	NaN	0.32	8.1006	-0.41	1.2	16.507	-0.12	0.365	3.2362	0.98464
0.475	2.5122	0.085	0.7	5.5918	0.8215	0.21	NaN	0.37	0.4	9.7025	NaN	1.3	17.673	-0.11	0.385	3.3724	1.0579
0.515	2.5784	-0.264	0.8	6.4521	0.8917	0.245	NaN	NaN	0.48	11.064	-0.59	1.5	19.398	-0.16	0.405	3.5054	1.0067
0.595	2.7106	0.246	0.9	7.4419	0.8557	0.25	NaN	0.42	0.5	11.321	-0.61	1.6	19.994	-0.14	0.425	3.6286	1.0192
0.715	2.9416	0.22	1	8.4823	0.8192	0.315	0.42789	NaN	0.56	11.994	-0.55	1.7	20.581	-0.22	0.445	3.7517	0.82019
0.755	3.0265	0.258	1.1	9.6217	0.734	0.32	0.75205	0.38	0.64	12.601	-0.5	1.9	21.998	-0.24	0.465	3.8749	0.87769
0.835	3.2139	0.154	1.2	10.728	0.7938	0.355	2.2355	NaN	0.72	13.412	-0.56	2	22.685	-0.1	0.485	3.9981	0.91527
0.865	3.2935	0.177	1.3	11.594	0.7017	0.36	2.3545	0.49	0.8	14.211	-0.7	2.1	23.34	-0.27	0.505	4.1197	0.9728
0.915	3.4261	0.207	1.4	12.224	0.9366	0.405	3.5161	NaN	0.88	15.039	-0.59	2.2	23.945	-0.2	0.525	4.2367	1.0377
0.955	3.5267	0.159	1.5	12.992	0.9697	0.41	3.6457	0.39	0.94	15.613	-0.62	2.3	24.581	-0.04	0.545	4.3536	0.96462
0.995	3.6226	0.118	1.6	13.987	0.9967	0.455	4.8082	NaN	1.02	16.415	-0.63	2.4	25.216	-0.11	0.565	4.4706	1.0136
1.075	3.8144	0.117	1.7	15.036	0.5467	0.46	4.9702	0.42	1.16	17.867	-0.29	2.5	25.837	-0.19	0.585	4.5876	1.0294
1.115	3.9103	0.258	1.8	16.178	0.5381	0.505	6.0547	NaN	1.26	19.481	-0.55	2.6	26.441	-0.16	0.605	4.7138	0.89871
1.195	4.1061	0.105	1.9	17.696	0.2407	0.51	6.1514	0.38	1.34	20.687	-0.35	2.7	27.062	-0.13	0.625	4.8677	0.97287
1.235	4.2155	-0.076	2	19.284	0.4446	0.545	6.8806	NaN	1.42	22.152	-0.51	2.8	27.698	-0.04	0.645	5.0217	1.0438
1.355	4.5434	0.077	2.1	20.569	0.7905	0.55	7.0399	0.33	1.5	23.132	-0.29	2.9	28.329	-0.17	0.665	5.1756	1.0276
1.435	4.7894	0.057	2.2	22.114	0.789	0.59	8.2466	0.34	1.58	24.035	-0.29	3	28.967	0.05	0.685	5.3295	0.9188
1.515	5.077	0.183	2.3	23.646	0.3571	0.595	8.4031	NaN	1.66	25.033	-0.4	3.1	29.628	0.04	0.705	5.469	0.97509
1.555	5.2209	0.202	2.4	25.268	0.2874	0.645	10.17	NaN	1.68	25.287	NaN	3.2	30.355	-0.02	0.725	5.5655	1.0487
1.675	5.5749	0.19	2.5	27.017	0.7416	0.65	10.368	0.38	1.76	26.577	NaN	3.3	31.106	-0.09	0.745	5.6619	0.98309
1.715	5.665	0.042	2.6	28.849	0.9665	0.705	12.019	NaN	1.78	26.916	-0.32	3.4	31.876	-0.02	0.765	5.7583	0.6515
1.755	5.7551	0.197	2.7	30.883	0.5563	0.71	12.124	0.28	1.84	27.957	-0.38	3.5	32.631	-0.01	0.785	5.8548	1.1283
1.795	5.8452	-0.095	2.8	32.954	0.6103	0.745	12.92	NaN	1.92	29.357	-0.27	3.6	33.195	-0.15	0.805	5.9501	0.8726
1.835	5.9409	-0.13	2.9	35.15	0.7399	0.75	13.061	0.07	2	30.94	-0.38	3.7	33.916	-0.1	0.845	6.1338	0.84513
1.915	6.1555	-0.058	3.1	39.531	1.0211	0.79	13.971	0.14	2.08	32.611	-0.47	3.8	34.683	-0.04	0.865	6.2256	0.92705
2.035	6.478	-0.149	3.3	NaN	0.8363	0.795	14.084	NaN	2.1	32.909	-0.61	3.9	35.591	-0.02	0.885	6.3175	0.82501
2.075	6.586	0.161	3.5	NaN	0.5584	0.845	15.126	NaN	2.12	33.235	-0.44	4	36.316	-0.14	0.905	6.4095	0.94565
2.195	6.9291	0.226	3.6	NaN	0.6521	0.85	15.225	0.2	2.16	34.021	-0.39	4.1	37.036	-0.14	0.925	6.502	0.69394
2.235	7.0705	0.103	3.7	NaN	0.4397	0.905	16.388	NaN	2.18	34.34	-0.31	4.2	37.86	-0.1	0.945	6.5945	0.68945
2.275	7.2119	0.005	3.8	NaN	0.8737	0.91	16.504	0.09	2.24	35.523	-0.42	4.3	38.735	0.09	0.985	6.7794	1.0038
2.355	7.4947	-0.084	3.9	NaN	0.972	0.945	17.286	NaN	2.32	36.785	-0.36	4.4	39.538	-0.09	1.005	6.879	0.47597
2.395	7.6298	-0.045	4	NaN	0.8266	0.95	17.392	0.01	2.4	38.241	-0.41	4.5	40.456	-0.02	1.045	7.1212	0.89061
2.435	7.7649	0.038	4.1	NaN	0.7823	1.015	18.702	NaN	2.48	39.659	-0.44	4.6	41.304	-0.16	1.065	7.2422	0.65815
2.475	7.9	0.093	4.2	NaN	0.8017	1.02	18.842	-0.07	2.54	40.883	-0.38	4.7	42.08	0.12	1.085	7.3633	0.50775
2.515	8.0388	-0.05	4.3	NaN	1.1719	1.045	19.426	NaN	2.64	NaN	-0.38	4.8	42.846	-0.04	1.105	7.4812	0.69274
2.555	8.187	-0.052	4.4	NaN	0.8386	1.05	19.518	-0.04	2.72	NaN	-0.69	4.9	NaN	-0.05	1.125	7.5896	0.81912
2.595	8.3352	-0.029	4.5	NaN	0.8999	1.095	20.307	NaN	2.76	NaN	-0.44	5	NaN	-0.04	1.145	7.698	0.78356
2.635	8.4834	-0.218	4.6	NaN	0.6042	1.1	20.395	-0.03	2.8	NaN	-0.66	5.1	NaN	0.02	1.165	7.8065	0.61395
2.715	8.786	0.028	4.7	NaN	0.8111	1.145	21.256	NaN	2.88	NaN	-0.83	5.2	NaN	-0.03	1.185	7.9149	0.82916
2.795	9.0922	-0.213	4.8	NaN	0.8132	1.15	21.366	0.09	2.94	NaN	-0.83	5.3	NaN	-0.09	1.205	8.0259	0.91234
2.915	9.5635	-0.201	4.9	NaN	0.7274	1.205	22.599	NaN	2.96	NaN	-0.78	5.4	NaN	-0.07	1.225	8.1449	0.75471
2.955	9.722	0.019	5	NaN	0.7505	1.21	22.708	0.02	3	NaN	-1.06	5.6	NaN	-0.03	1.245	8.2638	0.77067
3.035	10.086	-0.132	5.1	NaN	0.7099	1.245	23.432	NaN	3.04	NaN	-0.73	5.7	NaN	0.01	1.265	8.3827	1.1196
3.075	10.274	-0.212	NaN	NaN	NaN	1.25	23.533	0.06	3.1	NaN	-0.87	5.8	NaN	-0.13	1.285	8.5017	0.80486
3.115	10.462	-0.129	NaN	NaN	NaN	1.295	24.676	NaN	3.12	NaN	-0.72	5.9	NaN	0.06	1.305	8.6216	0.78469
3.195	11.019	-0.383	NaN	NaN	NaN	1.3	24.842	0.2	3.18	NaN	-0.55	6	NaN	-0.12	1.325	8.7445	0.70783
3.235	11.364	-0.034	NaN	NaN	NaN	1.345	26.497	NaN	3.2	NaN	-0.57	6.1	NaN	-0.16	1.345	8.8673	0.7929
3.275	11.683	-0.09	NaN	NaN	NaN	1.35	26.684	0.2	3.26	NaN	-0.9	6.2	NaN	-0.24	1.365	8.9902	0.74266
3.315	11.995	-0.114	NaN	NaN	NaN	1.395	28.551	NaN	3.28	NaN	-0.76	6.3	NaN	-0.2	1.385	9.1131	0.74295
3.395	12.556	-0.077	NaN	NaN	NaN	1.4	28.763	0.18	3.36	NaN	-0.68	6.4	NaN	-0.17	1.405	9.237	0.77498
3.435	12.939	-0.268	NaN	NaN	NaN	1.455	31.685	NaN	3.42	NaN	-0.56	6.5	NaN	-0.19	1.425	9.3642	0.76696
3.475	13.284	-0.073	NaN	NaN	NaN	1.46	31.971	0.18	3.5	NaN	-0.68	6.6	NaN	-0.69	1.445	9.4913	0.76414
3.515	13.617	-0.111	NaN	NaN	NaN	1.495	33.723	NaN	3.58	NaN	-0.92	6.7	NaN	-0.28	1.465	9.6185	0.5793
3.555	13.941	-0.188	NaN	NaN	NaN	1.5	33.989	0.2	3.66	NaN	-0.37	6.8	NaN	-0.36	1.485	9.7457	0.57402
3.595	14.213	-0.086	NaN	NaN	NaN	1.555	37.178	NaN	3.78	NaN	NaN	6.9	NaN	-0.4	1.505	9.8712	0.4243
3.635	14.461	0	NaN	NaN	NaN	1.56	37.45	0.25	3.8	NaN	-0.78	7	NaN	-0.42	1.525	9.9919	0.60411
3.675	14.678	-0.081	NaN	NaN	NaN	1.605	40.213	NaN	3.88	NaN	-0.61	7.1	NaN	-0.27	1.545	10.113	0.6542
3.715	14.894	-0.089	NaN	NaN	NaN	1.61	40.54	0.22	4.16	NaN	-0.52	7.2	NaN	-0.42	1.585	10.354	0.96033
3.755	15.084	-0.201	NaN	NaN	NaN	1.655	42.894	NaN	4.2	NaN	-0.71	7.3	NaN	-0.26	1.605	10.473	0.71344
3.795	15.23	-0.143	NaN	NaN	NaN	1.66	NaN	0.17	4.22	NaN	-0.73	7.4	NaN	-0.33	1.625	10.589	0.67954
3.835	15.339	-0.15	NaN	NaN	NaN	1.705	NaN	NaN	4.24	NaN	-0.71	7.6	NaN	-0.15	1.645	10.704	0.7869
3.875	15.436	-0.14	NaN	NaN	NaN	1.71	NaN	0.2	4.26	NaN	-0.67	7.7	NaN	-0.1	1.665	10.819	0.16216
3.915	15.534	-0.242	NaN	NaN	NaN	1.745	NaN	NaN	4.28	NaN	-0.76	7.8	NaN	-0.03	1.685	10.934	0.96674
3.955	15.635	-0.083	NaN	NaN	NaN	1.75	NaN	0.2	4.3	NaN	-0.75	7.8	NaN	-0.2	1.705	11.043	0.8484
4.035	15.853	-0.081	NaN	NaN	NaN	1.805	NaN	NaN	4.38	NaN	-0.72	8	NaN	0.01	1.725	11.131	0.45154
4.09	16.011	0.015	NaN	NaN	NaN	1.81	NaN	0.16	4.46	NaN	-0.63	8.1	NaN	-0.01	1.745	11.22	0.86058
4.155	16.216	-0.157	NaN	NaN	NaN	1.855	NaN	NaN	4.54	NaN	-0.64	8.2	NaN	-0.02	1.765	11.308	0.82056
4.195	16.346	-0.17	NaN	NaN	NaN	1.86	NaN	0.1	4.62	NaN	-0.57	8.3	NaN	-0.08	1.785	11.397	0.86021
4.235	16.475	-0.226	NaN	NaN	NaN	1.905	NaN	NaN	4.7	NaN	-0.51	8.4	NaN	-0.14	1.805	11.483	0.7602
4.275	16.629	-0.065	NaN	NaN	NaN	1.91	NaN	0.07	4.78	NaN	-0.75	8.5	NaN	-0.03	1.845	11.642	0.91152
4.315	16.796	-0.132	NaN	NaN	NaN	1.955	NaN	NaN	4.86	NaN	-1.17	8.6	NaN	-0.02	1.865	11.721	0.83243
4.355	16.929	-0.24	NaN	NaN	NaN	1.96	NaN	0.12	4.96	NaN	NaN	8.7	NaN	-0.07	1.885	11.801	0.92806
4.395	17.062	-0.191	NaN	NaN	NaN	2.005	NaN	NaN	5.12	NaN	-0.8	8.8	NaN	-0.03	1.905	11.877	0.96885
4.435	17.192	-0.13	NaN	NaN	NaN	2.01	NaN	0.06	5.2	NaN	NaN	8.9	NaN	0.06	1.925	11.941	0.58638
4.475	17.317	-0.302	NaN	NaN	NaN	2.045	NaN	NaN	5.28	NaN	NaN	9	NaN	0.08	1.945	12.005	0.79479
4.515	17.443	-0.159	NaN	NaN	NaN	2.05	NaN	0.1	NaN	NaN	NaN	9.1	NaN	-0.04	1.965	12.069	0.93093
4.555	17.569	-0.217	NaN	NaN	NaN	2.095	NaN	NaN	NaN	NaN	NaN	9.2	NaN	-0.11	1.985	12.134	1.1287
4.595	17.69	-0.11	NaN	NaN	NaN	2.1	NaN	0.09	NaN	NaN	NaN	9.3	NaN	-0.09	2.005	12.194	0.87835
4.675	17.92	-0.248	NaN	NaN	NaN	2.155	NaN	NaN	NaN	NaN	NaN	9.4	NaN	-0.23	2.025	12.244	0.8505
4.715	18.035	-0.249	NaN	NaN	NaN	2.16	NaN	0.1	NaN	NaN	NaN	9.5	NaN	-0.21	2.065	12.344	0.92791
4.795	18.258	-0.285	NaN	NaN	NaN	2.21	NaN	0.26	NaN	NaN	NaN	9.6	NaN	-0.17	2.085	12.395	0.6328
4.875	18.478	-0.363	NaN	NaN	NaN	2.215	NaN	NaN	NaN	NaN	NaN	9.7	NaN	-0.26	2.105	12.454	0.57506
4.915	18.607	-0.106	NaN	NaN	NaN	2.255	NaN	NaN	NaN	NaN	NaN	10	NaN	0	2.125	12.54	0.59176
4.955	18.772	-0.276	NaN	NaN	NaN	2.26	NaN	0.36	NaN	NaN	NaN	NaN	NaN	NaN	2.145	12.627	0.83421
5.035	19.101	-0.412	NaN	NaN	NaN	2.305	NaN	NaN	NaN	NaN	NaN	NaN	NaN	NaN	2.165	12.714	0.54023
5.075	19.247	-0.372	NaN	NaN	NaN	2.31	NaN	0.25	NaN	NaN	NaN	NaN	NaN	NaN	2.185	12.8	0.69793
5.115	19.356	-0.409	NaN	NaN	NaN	2.35	NaN	0.26	NaN	NaN	NaN	NaN	NaN	NaN	2.205	12.887	0.66879
5.155	19.464	-0.434	NaN	NaN	NaN	2.355	NaN	NaN	NaN	NaN	NaN	NaN	NaN	NaN	2.225	12.976	0.7081
5.195	19.573	-0.209	NaN	NaN	NaN	2.415	NaN	NaN	NaN	NaN	NaN	NaN	NaN	NaN	2.265	13.153	0.80097
5.235	19.68	-0.246	NaN	NaN	NaN	2.42	NaN	0.24	NaN	NaN	NaN	NaN	NaN	NaN	2.285	13.241	0.73567
5.275	19.782	-0.396	NaN	NaN	NaN	2.465	NaN	NaN	NaN	NaN	NaN	NaN	NaN	NaN	2.305	13.329	0.43261
5.295	19.83	-0.332	NaN	NaN	NaN	2.47	NaN	0.08	NaN	NaN	NaN	NaN	NaN	NaN	2.325	13.415	0.68301
5.315	19.878	-0.162	NaN	NaN	NaN	2.505	NaN	NaN	NaN	NaN	NaN	NaN	NaN	NaN	2.345	13.5	0.64832
5.355	19.974	-0.364	NaN	NaN	NaN	2.51	NaN	0.28	NaN	NaN	NaN	NaN	NaN	NaN	2.365	13.586	0.41609
5.435	20.168	-0.307	NaN	NaN	NaN	2.555	NaN	NaN	NaN	NaN	NaN	NaN	NaN	NaN	2.385	13.671	0.70534
5.475	20.265	-0.211	NaN	NaN	NaN	2.56	NaN	0.24	NaN	NaN	NaN	NaN	NaN	NaN	2.405	13.757	0.70251
5.515	20.362	-0.344	NaN	NaN	NaN	2.615	NaN	NaN	NaN	NaN	NaN	NaN	NaN	NaN	2.425	13.843	0.6965
5.555	20.459	-0.365	NaN	NaN	NaN	2.62	NaN	0.11	NaN	NaN	NaN	NaN	NaN	NaN	2.445	13.929	0.72811
5.595	20.556	-0.405	NaN	NaN	NaN	2.645	NaN	NaN	NaN	NaN	NaN	NaN	NaN	NaN	2.465	14.015	0.77749
5.755	20.956	-0.262	NaN	NaN	NaN	2.65	NaN	0.08	NaN	NaN	NaN	NaN	NaN	NaN	2.485	14.101	0.42566
5.795	21.079	-0.348	NaN	NaN	NaN	2.695	NaN	NaN	NaN	NaN	NaN	NaN	NaN	NaN	2.505	14.189	0.76984
5.835	21.201	-0.236	NaN	NaN	NaN	2.7	NaN	0.27	NaN	NaN	NaN	NaN	NaN	NaN	2.525	14.281	0.82679
5.875	21.324	-0.361	NaN	NaN	NaN	2.745	NaN	NaN	NaN	NaN	NaN	NaN	NaN	NaN	2.565	14.467	0.90911
5.915	21.448	-0.366	NaN	NaN	NaN	2.75	NaN	0.18	NaN	NaN	NaN	NaN	NaN	NaN	2.585	14.56	0.87174
6.115	22.083	-0.401	NaN	NaN	NaN	2.795	NaN	NaN	NaN	NaN	NaN	NaN	NaN	NaN	2.605	14.652	0.93171
6.155	22.204	-0.273	NaN	NaN	NaN	2.8	NaN	0.14	NaN	NaN	NaN	NaN	NaN	NaN	2.625	14.745	0.90631
6.315	22.682	-0.252	NaN	NaN	NaN	2.855	NaN	NaN	NaN	NaN	NaN	NaN	NaN	NaN	2.645	14.837	0.88408
6.435	23.003	-0.347	NaN	NaN	NaN	2.86	NaN	0.14	NaN	NaN	NaN	NaN	NaN	NaN	2.665	14.93	0.89094
6.475	23.102	-0.207	NaN	NaN	NaN	2.905	NaN	NaN	NaN	NaN	NaN	NaN	NaN	NaN	2.685	15.022	0.80646
6.595	23.398	-0.209	NaN	NaN	NaN	2.945	NaN	NaN	NaN	NaN	NaN	NaN	NaN	NaN	2.705	15.115	0.84203
6.635	23.497	-0.312	NaN	NaN	NaN	3.005	NaN	NaN	NaN	NaN	NaN	NaN	NaN	NaN	2.725	15.209	0.85168
6.915	24.234	-0.085	NaN	NaN	NaN	3.01	NaN	0.16	NaN	NaN	NaN	NaN	NaN	NaN	2.745	15.303	0.46413
7.075	24.689	-0.225	NaN	NaN	NaN	3.045	NaN	NaN	NaN	NaN	NaN	NaN	NaN	NaN	2.765	15.397	0.90007
7.115	24.822	-0.162	NaN	NaN	NaN	3.05	NaN	0.29	NaN	NaN	NaN	NaN	NaN	NaN	2.785	15.491	0.82564
7.235	25.227	-0.349	NaN	NaN	NaN	3.095	NaN	NaN	NaN	NaN	NaN	NaN	NaN	NaN	2.805	15.586	0.73377
7.275	25.364	-0.379	NaN	NaN	NaN	3.1	NaN	0.09	NaN	NaN	NaN	NaN	NaN	NaN	2.825	15.685	0.70888
7.315	25.501	-0.283	NaN	NaN	NaN	3.145	NaN	NaN	NaN	NaN	NaN	NaN	NaN	NaN	2.845	15.783	0.67814
7.355	25.64	-0.233	NaN	NaN	NaN	3.15	NaN	0.04	NaN	NaN	NaN	NaN	NaN	NaN	2.865	15.882	0.77083
7.395	25.794	-0.321	NaN	NaN	NaN	3.205	NaN	NaN	NaN	NaN	NaN	NaN	NaN	NaN	2.885	15.981	0.80928
7.435	25.973	-0.084	NaN	NaN	NaN	3.21	NaN	-0.28	NaN	NaN	NaN	NaN	NaN	NaN	2.905	16.083	0.79411
7.475	26.183	-0.224	NaN	NaN	NaN	3.255	NaN	NaN	NaN	NaN	NaN	NaN	NaN	NaN	2.945	16.305	1.014
7.515	26.404	-0.209	NaN	NaN	NaN	3.26	NaN	-0.29	NaN	NaN	NaN	NaN	NaN	NaN	2.965	16.415	0.44819
7.555	26.624	-0.163	NaN	NaN	NaN	3.295	NaN	NaN	NaN	NaN	NaN	NaN	NaN	NaN	2.985	16.526	0.2399
7.595	26.852	-0.073	NaN	NaN	NaN	3.3	NaN	-0.1	NaN	NaN	NaN	NaN	NaN	NaN	3.005	16.636	0.37648
7.635	27.087	-0.188	NaN	NaN	NaN	3.345	NaN	NaN	NaN	NaN	NaN	NaN	NaN	NaN	3.025	16.743	0.36229
7.675	27.322	-0.355	NaN	NaN	NaN	3.35	NaN	-0.04	NaN	NaN	NaN	NaN	NaN	NaN	3.045	16.849	0.15534
7.715	27.554	-0.211	NaN	NaN	NaN	3.405	NaN	NaN	NaN	NaN	NaN	NaN	NaN	NaN	3.065	16.956	0.72616
7.755	27.787	-0.271	NaN	NaN	NaN	3.41	NaN	-0.03	NaN	NaN	NaN	NaN	NaN	NaN	3.105	17.168	0.10076
7.795	28.019	-0.273	NaN	NaN	NaN	3.445	NaN	NaN	NaN	NaN	NaN	NaN	NaN	NaN	3.145	17.37	0.39993
7.835	28.25	-0.261	NaN	NaN	NaN	3.45	NaN	-0.1	NaN	NaN	NaN	NaN	NaN	NaN	3.165	17.47	0.2708
7.875	28.481	-0.15	NaN	NaN	NaN	3.505	NaN	NaN	NaN	NaN	NaN	NaN	NaN	NaN	3.185	17.571	0.22893
7.915	28.716	-0.136	NaN	NaN	NaN	3.51	NaN	-0.06	NaN	NaN	NaN	NaN	NaN	NaN	3.205	17.67	0.27063
7.955	28.951	-0.247	NaN	NaN	NaN	3.545	NaN	NaN	NaN	NaN	NaN	NaN	NaN	NaN	3.225	17.762	0.25866
7.995	29.142	-0.412	NaN	NaN	NaN	3.55	NaN	-0.17	NaN	NaN	NaN	NaN	NaN	NaN	3.245	17.854	0.3511
8.035	29.338	-0.233	NaN	NaN	NaN	3.605	NaN	NaN	NaN	NaN	NaN	NaN	NaN	NaN	3.265	17.946	0.56155
8.075	29.535	-0.139	NaN	NaN	NaN	3.61	NaN	-0.13	NaN	NaN	NaN	NaN	NaN	NaN	3.285	18.039	0.4087
8.115	29.731	-0.208	NaN	NaN	NaN	3.655	NaN	NaN	NaN	NaN	NaN	NaN	NaN	NaN	3.305	18.13	0.011917
8.155	29.946	-0.264	NaN	NaN	NaN	3.66	NaN	-0.12	NaN	NaN	NaN	NaN	NaN	NaN	3.325	18.218	0.35812
8.195	30.163	-0.239	NaN	NaN	NaN	3.705	NaN	NaN	NaN	NaN	NaN	NaN	NaN	NaN	3.345	18.307	0.16701
8.235	30.381	-0.241	NaN	NaN	NaN	3.71	NaN	-0.11	NaN	NaN	NaN	NaN	NaN	NaN	3.365	18.395	0.24746
8.275	30.601	-0.105	NaN	NaN	NaN	3.755	NaN	NaN	NaN	NaN	NaN	NaN	NaN	NaN	3.385	18.483	0.45956
8.315	30.822	-0.172	NaN	NaN	NaN	3.76	NaN	-0.13	NaN	NaN	NaN	NaN	NaN	NaN	3.405	18.583	0.3828
8.355	31.043	-0.224	NaN	NaN	NaN	3.795	NaN	NaN	NaN	NaN	NaN	NaN	NaN	NaN	3.425	18.715	0.080323
8.395	31.267	-0.143	NaN	NaN	NaN	3.8	NaN	-0.12	NaN	NaN	NaN	NaN	NaN	NaN	3.445	18.847	0.30481
8.435	31.493	-0.25	NaN	NaN	NaN	3.855	NaN	NaN	NaN	NaN	NaN	NaN	NaN	NaN	3.465	18.979	0.38008
8.475	31.719	-0.248	NaN	NaN	NaN	3.86	NaN	-0.11	NaN	NaN	NaN	NaN	NaN	NaN	3.485	19.111	0.034351
8.515	31.945	-0.068	NaN	NaN	NaN	3.905	NaN	NaN	NaN	NaN	NaN	NaN	NaN	NaN	3.505	19.232	0.21593
8.555	32.17	-0.452	NaN	NaN	NaN	3.91	NaN	-0.2	NaN	NaN	NaN	NaN	NaN	NaN	3.525	19.319	0.45205
8.595	32.394	NaN	NaN	NaN	NaN	3.955	NaN	NaN	NaN	NaN	NaN	NaN	NaN	NaN	3.545	19.407	0.33994
8.635	32.616	-0.216	NaN	NaN	NaN	3.96	NaN	-0.17	NaN	NaN	NaN	NaN	NaN	NaN	3.565	19.494	0.32294
8.675	32.776	-0.053	NaN	NaN	NaN	4.015	NaN	NaN	NaN	NaN	NaN	NaN	NaN	NaN	3.585	19.581	0.41365
8.715	32.937	-0.149	NaN	NaN	NaN	4.02	NaN	-0.18	NaN	NaN	NaN	NaN	NaN	NaN	3.605	19.667	0.11575
8.755	33.13	-0.13	NaN	NaN	NaN	4.055	NaN	NaN	NaN	NaN	NaN	NaN	NaN	NaN	3.625	19.75	0.17191
8.835	33.661	-0.245	NaN	NaN	NaN	4.06	NaN	-0.19	NaN	NaN	NaN	NaN	NaN	NaN	3.645	19.832	0.36269
8.875	33.924	-0.085	NaN	NaN	NaN	4.105	NaN	NaN	NaN	NaN	NaN	NaN	NaN	NaN	3.665	19.914	0.36015
8.955	34.447	-0.045	NaN	NaN	NaN	4.11	NaN	-0.1	NaN	NaN	NaN	NaN	NaN	NaN	3.685	19.996	0.26879
8.995	34.822	-0.282	NaN	NaN	NaN	4.155	NaN	NaN	NaN	NaN	NaN	NaN	NaN	NaN	3.705	20.079	0.1227
9.035	35.25	-0.291	NaN	NaN	NaN	4.16	NaN	-0.19	NaN	NaN	NaN	NaN	NaN	NaN	3.725	20.162	0.39267
9.075	35.608	-0.1	NaN	NaN	NaN	4.205	NaN	NaN	NaN	NaN	NaN	NaN	NaN	NaN	3.745	20.245	0.41065
9.115	35.929	-0.25	NaN	NaN	NaN	4.21	NaN	-0.23	NaN	NaN	NaN	NaN	NaN	NaN	3.765	20.328	0.27253
9.155	36.248	-0.548	NaN	NaN	NaN	4.255	NaN	NaN	NaN	NaN	NaN	NaN	NaN	NaN	3.785	20.411	0.33275
9.195	36.563	-0.213	NaN	NaN	NaN	4.26	NaN	-0.13	NaN	NaN	NaN	NaN	NaN	NaN	3.805	20.494	0.47427
9.235	36.88	-0.12	NaN	NaN	NaN	4.305	NaN	NaN	NaN	NaN	NaN	NaN	NaN	NaN	3.825	20.577	0.22551
9.275	37.164	-0.21	NaN	NaN	NaN	4.31	NaN	-0.13	NaN	NaN	NaN	NaN	NaN	NaN	3.845	20.659	0.21974
9.355	37.822	-0.093	NaN	NaN	NaN	4.355	NaN	NaN	NaN	NaN	NaN	NaN	NaN	NaN	3.865	20.742	0.44446
9.395	38.193	-0.358	NaN	NaN	NaN	4.36	NaN	0.06	NaN	NaN	NaN	NaN	NaN	NaN	3.885	20.825	0.28907
9.435	38.512	-0.408	NaN	NaN	NaN	4.395	NaN	NaN	NaN	NaN	NaN	NaN	NaN	NaN	3.905	20.913	0.39751
9.515	38.935	-0.207	NaN	NaN	NaN	4.4	NaN	-0.02	NaN	NaN	NaN	NaN	NaN	NaN	3.925	21.018	0.35638
9.555	39.092	0.003	NaN	NaN	NaN	4.455	NaN	NaN	NaN	NaN	NaN	NaN	NaN	NaN	3.945	21.122	0.34077
9.595	39.249	-0.72	NaN	NaN	NaN	4.46	NaN	0.24	NaN	NaN	NaN	NaN	NaN	NaN	3.965	21.227	0.53094
9.635	39.407	-0.309	NaN	NaN	NaN	4.505	NaN	NaN	NaN	NaN	NaN	NaN	NaN	NaN	3.985	21.332	0.56611
9.715	39.722	-0.476	NaN	NaN	NaN	4.51	NaN	0.12	NaN	NaN	NaN	NaN	NaN	NaN	4.005	21.438	0.17051
9.755	39.887	-0.227	NaN	NaN	NaN	4.545	NaN	NaN	NaN	NaN	NaN	NaN	NaN	NaN	4.025	21.548	0.22031
9.795	40.08	-0.684	NaN	NaN	NaN	4.55	NaN	0.1	NaN	NaN	NaN	NaN	NaN	NaN	4.045	21.658	0.41247
9.875	40.467	-0.265	NaN	NaN	NaN	4.605	NaN	NaN	NaN	NaN	NaN	NaN	NaN	NaN	4.065	21.768	0.44048
9.955	40.839	-0.151	NaN	NaN	NaN	4.61	NaN	0.1	NaN	NaN	NaN	NaN	NaN	NaN	4.085	21.878	0.36785
9.995	40.991	-0.09	NaN	NaN	NaN	4.645	NaN	NaN	NaN	NaN	NaN	NaN	NaN	NaN	4.105	21.987	0.40734
10.035	41.144	-0.3	NaN	NaN	NaN	4.65	NaN	0.15	NaN	NaN	NaN	NaN	NaN	NaN	4.125	22.09	0.43903
10.115	41.43	-0.164	NaN	NaN	NaN	4.705	NaN	NaN	NaN	NaN	NaN	NaN	NaN	NaN	4.145	22.194	-0.050452
10.155	41.567	-0.08	NaN	NaN	NaN	4.71	NaN	0.03	NaN	NaN	NaN	NaN	NaN	NaN	4.165	22.298	0.41645
10.195	41.703	-0.091	NaN	NaN	NaN	4.745	NaN	NaN	NaN	NaN	NaN	NaN	NaN	NaN	4.185	22.402	0.21673
10.235	41.84	-0.089	NaN	NaN	NaN	4.75	NaN	0.07	NaN	NaN	NaN	NaN	NaN	NaN	4.205	22.505	0.40752
10.275	41.977	-0.276	NaN	NaN	NaN	4.8	NaN	-0.24	NaN	NaN	NaN	NaN	NaN	NaN	4.225	22.609	0.31478
10.315	42.114	-0.377	NaN	NaN	NaN	4.805	NaN	NaN	NaN	NaN	NaN	NaN	NaN	NaN	4.245	22.712	0.029146
10.355	42.25	-0.223	NaN	NaN	NaN	4.81	NaN	-0.04	NaN	NaN	NaN	NaN	NaN	NaN	4.265	22.816	0.32402
10.395	42.379	-0.122	NaN	NaN	NaN	4.845	NaN	NaN	NaN	NaN	NaN	NaN	NaN	NaN	4.285	22.919	0.29489
10.4	42.393	-0.259	NaN	NaN	NaN	4.85	NaN	-0.26	NaN	NaN	NaN	NaN	NaN	NaN	4.305	23.02	0.24584
10.435	42.491	-0.034	NaN	NaN	NaN	4.905	NaN	NaN	NaN	NaN	NaN	NaN	NaN	NaN	4.325	23.115	0.30563
10.475	42.603	-0.361	NaN	NaN	NaN	4.955	NaN	NaN	NaN	NaN	NaN	NaN	NaN	NaN	4.345	23.21	0.37275
10.515	42.715	-0.221	NaN	NaN	NaN	4.96	NaN	-0.37	NaN	NaN	NaN	NaN	NaN	NaN	4.365	23.305	0.28833
10.555	42.827	-0.204	NaN	NaN	NaN	5.005	NaN	NaN	NaN	NaN	NaN	NaN	NaN	NaN	4.385	23.4	0.3233
10.655	NaN	-0.132	NaN	NaN	NaN	5.01	NaN	-0.2	NaN	NaN	NaN	NaN	NaN	NaN	4.405	23.496	0.25524
10.755	NaN	-0.238	NaN	NaN	NaN	5.055	NaN	NaN	NaN	NaN	NaN	NaN	NaN	NaN	4.425	23.594	0.5239
10.815	NaN	-0.094	NaN	NaN	NaN	5.06	NaN	-0.08	NaN	NaN	NaN	NaN	NaN	NaN	4.445	23.691	0.41244
10.855	NaN	-0.904	NaN	NaN	NaN	5.105	NaN	NaN	NaN	NaN	NaN	NaN	NaN	NaN	4.465	23.789	0.38012
10.915	NaN	0.005	NaN	NaN	NaN	5.11	NaN	-0.16	NaN	NaN	NaN	NaN	NaN	NaN	4.485	23.887	0.58287
10.955	NaN	-0.72	NaN	NaN	NaN	5.155	NaN	NaN	NaN	NaN	NaN	NaN	NaN	NaN	4.51	24.014	0.55235
11.015	NaN	-0.293	NaN	NaN	NaN	5.16	NaN	-0.11	NaN	NaN	NaN	NaN	NaN	NaN	4.57	24.339	0.38408
11.055	NaN	-0.132	NaN	NaN	NaN	5.195	NaN	NaN	NaN	NaN	NaN	NaN	NaN	NaN	4.59	24.447	0.28357
11.13	NaN	-0.319	NaN	NaN	NaN	5.2	NaN	-0.03	NaN	NaN	NaN	NaN	NaN	NaN	4.63	24.662	0.31226
11.19	NaN	-0.19	NaN	NaN	NaN	5.255	NaN	NaN	NaN	NaN	NaN	NaN	NaN	NaN	4.65	24.769	0.29121
11.23	NaN	-0.141	NaN	NaN	NaN	5.26	NaN	-0.14	NaN	NaN	NaN	NaN	NaN	NaN	4.67	24.876	0.33622
11.29	NaN	-0.431	NaN	NaN	NaN	5.305	NaN	NaN	NaN	NaN	NaN	NaN	NaN	NaN	4.69	24.983	0.3999
11.33	NaN	-0.339	NaN	NaN	NaN	5.31	NaN	-0.18	NaN	NaN	NaN	NaN	NaN	NaN	4.73	25.202	0.63898
11.39	NaN	-0.239	NaN	NaN	NaN	5.355	NaN	NaN	NaN	NaN	NaN	NaN	NaN	NaN	4.75	25.311	0.43137
11.43	NaN	-0.161	NaN	NaN	NaN	5.36	NaN	-0.22	NaN	NaN	NaN	NaN	NaN	NaN	4.77	25.421	0.46655
11.49	NaN	-0.238	NaN	NaN	NaN	5.405	NaN	NaN	NaN	NaN	NaN	NaN	NaN	NaN	4.81	25.643	0.3703
11.53	NaN	-0.286	NaN	NaN	NaN	5.41	NaN	-0.26	NaN	NaN	NaN	NaN	NaN	NaN	4.83	25.758	0.22393
11.63	NaN	-0.431	NaN	NaN	NaN	5.445	NaN	NaN	NaN	NaN	NaN	NaN	NaN	NaN	4.85	25.873	0.51612
11.81	NaN	-0.28	NaN	NaN	NaN	5.45	NaN	-0.23	NaN	NaN	NaN	NaN	NaN	NaN	4.87	25.987	0.32428
11.85	NaN	-0.513	NaN	NaN	NaN	5.495	NaN	NaN	NaN	NaN	NaN	NaN	NaN	NaN	4.89	26.102	0.35058
11.93	NaN	-0.366	NaN	NaN	NaN	5.5	NaN	-0.27	NaN	NaN	NaN	NaN	NaN	NaN	4.91	26.216	0.4014
11.97	NaN	-0.564	NaN	NaN	NaN	5.555	NaN	NaN	NaN	NaN	NaN	NaN	NaN	NaN	4.93	26.329	0.52118
12.09	NaN	-0.441	NaN	NaN	NaN	5.56	NaN	-0.26	NaN	NaN	NaN	NaN	NaN	NaN	4.95	26.442	0.4244
12.13	NaN	-0.415	NaN	NaN	NaN	5.605	NaN	NaN	NaN	NaN	NaN	NaN	NaN	NaN	4.97	26.555	0.33745
12.17	NaN	-0.426	NaN	NaN	NaN	5.61	NaN	-0.12	NaN	NaN	NaN	NaN	NaN	NaN	4.99	26.669	0.31741
12.21	NaN	-0.45	NaN	NaN	NaN	5.655	NaN	NaN	NaN	NaN	NaN	NaN	NaN	NaN	5.01	26.786	0.46415
12.25	NaN	-0.386	NaN	NaN	NaN	5.66	NaN	-0.19	NaN	NaN	NaN	NaN	NaN	NaN	5.03	26.906	0.50213
12.29	NaN	-0.56	NaN	NaN	NaN	5.705	NaN	NaN	NaN	NaN	NaN	NaN	NaN	NaN	5.05	27.027	0.084489
12.49	NaN	-0.614	NaN	NaN	NaN	5.71	NaN	-0.3	NaN	NaN	NaN	NaN	NaN	NaN	5.07	27.147	0.51195
12.53	NaN	-0.627	NaN	NaN	NaN	5.755	NaN	NaN	NaN	NaN	NaN	NaN	NaN	NaN	5.09	27.268	0.74874
12.57	NaN	-0.646	NaN	NaN	NaN	5.76	NaN	-0.21	NaN	NaN	NaN	NaN	NaN	NaN	5.11	27.388	0.67215
12.61	NaN	-0.677	NaN	NaN	NaN	5.805	NaN	NaN	NaN	NaN	NaN	NaN	NaN	NaN	5.13	27.507	0.58588
12.65	NaN	-0.579	NaN	NaN	NaN	5.81	NaN	-0.26	NaN	NaN	NaN	NaN	NaN	NaN	5.15	27.627	0.62494
12.69	NaN	-0.489	NaN	NaN	NaN	5.845	NaN	NaN	NaN	NaN	NaN	NaN	NaN	NaN	5.17	27.746	0.5438
12.73	NaN	-0.605	NaN	NaN	NaN	5.85	NaN	-0.18	NaN	NaN	NaN	NaN	NaN	NaN	5.19	27.865	0.37475
12.77	NaN	NaN	NaN	NaN	NaN	5.905	NaN	NaN	NaN	NaN	NaN	NaN	NaN	NaN	5.21	27.984	0.79668
12.81	NaN	-0.8	NaN	NaN	NaN	5.91	NaN	-0.11	NaN	NaN	NaN	NaN	NaN	NaN	5.25	28.222	0.77932
12.85	NaN	-0.615	NaN	NaN	NaN	5.955	NaN	NaN	NaN	NaN	NaN	NaN	NaN	NaN	5.27	28.341	0.75816
12.89	NaN	-0.586	NaN	NaN	NaN	5.96	NaN	0.04	NaN	NaN	NaN	NaN	NaN	NaN	5.29	28.46	0.75072
12.93	NaN	-0.602	NaN	NaN	NaN	5.995	NaN	NaN	NaN	NaN	NaN	NaN	NaN	NaN	5.31	28.58	0.65902
12.97	NaN	-0.497	NaN	NaN	NaN	6	NaN	-0.05	NaN	NaN	NaN	NaN	NaN	NaN	5.35	28.821	0.48264
13.01	NaN	-0.659	NaN	NaN	NaN	6.005	NaN	NaN	NaN	NaN	NaN	NaN	NaN	NaN	5.37	28.942	0.8575
13.05	NaN	-0.536	NaN	NaN	NaN	6.055	NaN	NaN	NaN	NaN	NaN	NaN	NaN	NaN	5.41	29.186	0.33495
13.09	NaN	-0.553	NaN	NaN	NaN	6.06	NaN	0.01	NaN	NaN	NaN	NaN	NaN	NaN	5.43	29.312	0.52004
13.17	NaN	-0.457	NaN	NaN	NaN	6.105	NaN	NaN	NaN	NaN	NaN	NaN	NaN	NaN	5.45	29.438	0.49092
13.21	NaN	-0.496	NaN	NaN	NaN	6.11	NaN	0.06	NaN	NaN	NaN	NaN	NaN	NaN	5.47	29.564	0.57444
13.25	NaN	-0.417	NaN	NaN	NaN	6.145	NaN	NaN	NaN	NaN	NaN	NaN	NaN	NaN	5.49	29.69	0.50058
13.29	NaN	-0.579	NaN	NaN	NaN	6.15	NaN	-0.01	NaN	NaN	NaN	NaN	NaN	NaN	5.51	29.823	0.53612
13.33	NaN	-0.601	NaN	NaN	NaN	6.205	NaN	NaN	NaN	NaN	NaN	NaN	NaN	NaN	5.53	29.962	0.48074
13.37	NaN	-0.551	NaN	NaN	NaN	6.21	NaN	-0.21	NaN	NaN	NaN	NaN	NaN	NaN	5.55	30.102	0.61539
13.41	NaN	-0.498	NaN	NaN	NaN	6.255	NaN	NaN	NaN	NaN	NaN	NaN	NaN	NaN	5.57	30.242	0.5462
13.45	NaN	-0.516	NaN	NaN	NaN	6.26	NaN	-0.06	NaN	NaN	NaN	NaN	NaN	NaN	5.59	30.381	0.25803
13.49	NaN	-0.618	NaN	NaN	NaN	6.305	NaN	NaN	NaN	NaN	NaN	NaN	NaN	NaN	5.61	30.522	0.4346
13.53	NaN	-0.479	NaN	NaN	NaN	6.31	NaN	-0.2	NaN	NaN	NaN	NaN	NaN	NaN	5.63	30.664	0.39734
13.61	NaN	-0.755	NaN	NaN	NaN	6.355	NaN	NaN	NaN	NaN	NaN	NaN	NaN	NaN	5.65	30.806	0.39381
13.65	NaN	-0.519	NaN	NaN	NaN	6.36	NaN	-0.2	NaN	NaN	NaN	NaN	NaN	NaN	5.67	30.948	0.6002
13.69	NaN	-0.478	NaN	NaN	NaN	6.405	NaN	NaN	NaN	NaN	NaN	NaN	NaN	NaN	5.71	31.234	0.5672
13.77	NaN	-0.734	NaN	NaN	NaN	6.41	NaN	-0.22	NaN	NaN	NaN	NaN	NaN	NaN	5.73	31.379	0.77306
13.81	NaN	-0.436	NaN	NaN	NaN	6.455	NaN	NaN	NaN	NaN	NaN	NaN	NaN	NaN	5.75	31.524	0.81587
13.85	NaN	-0.55	NaN	NaN	NaN	6.46	NaN	-0.17	NaN	NaN	NaN	NaN	NaN	NaN	5.79	31.815	0.91713
13.89	NaN	-0.509	NaN	NaN	NaN	6.505	NaN	NaN	NaN	NaN	NaN	NaN	NaN	NaN	5.81	31.96	0.39877
13.93	NaN	-0.307	NaN	NaN	NaN	6.51	NaN	-0.17	NaN	NaN	NaN	NaN	NaN	NaN	5.83	32.104	0.52712
14.09	NaN	-0.461	NaN	NaN	NaN	6.555	NaN	NaN	NaN	NaN	NaN	NaN	NaN	NaN	5.85	32.248	0.47786
14.13	NaN	-0.594	NaN	NaN	NaN	6.56	NaN	-0.05	NaN	NaN	NaN	NaN	NaN	NaN	5.89	32.536	0.46986
14.17	NaN	-0.51	NaN	NaN	NaN	6.605	NaN	NaN	NaN	NaN	NaN	NaN	NaN	NaN	5.91	32.66	0.42068
14.29	NaN	-0.387	NaN	NaN	NaN	6.61	NaN	-0.11	NaN	NaN	NaN	NaN	NaN	NaN	5.95	32.866	0.66578
14.37	NaN	-0.434	NaN	NaN	NaN	6.655	NaN	NaN	NaN	NaN	NaN	NaN	NaN	NaN	5.97	32.969	0.60178
14.41	NaN	-0.495	NaN	NaN	NaN	6.66	NaN	-0.2	NaN	NaN	NaN	NaN	NaN	NaN	6.03	33.328	0.57387
14.45	NaN	-0.369	NaN	NaN	NaN	6.705	NaN	NaN	NaN	NaN	NaN	NaN	NaN	NaN	6.09	33.737	0.57103
14.49	NaN	-0.384	NaN	NaN	NaN	6.71	NaN	-0.16	NaN	NaN	NaN	NaN	NaN	NaN	6.11	33.872	0.59402
14.53	NaN	-0.419	NaN	NaN	NaN	6.755	NaN	NaN	NaN	NaN	NaN	NaN	NaN	NaN	6.13	34.006	0.43722
14.57	NaN	-0.49	NaN	NaN	NaN	6.76	NaN	-0.2	NaN	NaN	NaN	NaN	NaN	NaN	6.15	34.141	0.68577
14.65	NaN	-0.503	NaN	NaN	NaN	6.805	NaN	NaN	NaN	NaN	NaN	NaN	NaN	NaN	6.17	34.275	0.51592
14.69	NaN	-0.421	NaN	NaN	NaN	6.81	NaN	-0.16	NaN	NaN	NaN	NaN	NaN	NaN	6.19	34.409	0.40371
14.73	NaN	-0.497	NaN	NaN	NaN	6.855	NaN	NaN	NaN	NaN	NaN	NaN	NaN	NaN	6.21	34.568	0.76093
14.81	NaN	-0.394	NaN	NaN	NaN	6.86	NaN	-0.12	NaN	NaN	NaN	NaN	NaN	NaN	6.23	34.752	0.44816
14.85	NaN	-0.366	NaN	NaN	NaN	6.905	NaN	NaN	NaN	NaN	NaN	NaN	NaN	NaN	6.25	34.935	0.87735
14.89	NaN	-0.416	NaN	NaN	NaN	6.91	NaN	-0.08	NaN	NaN	NaN	NaN	NaN	NaN	6.27	35.119	0.8598
14.93	NaN	-0.243	NaN	NaN	NaN	6.955	NaN	NaN	NaN	NaN	NaN	NaN	NaN	NaN	6.29	35.302	0.86217
15.01	NaN	-0.437	NaN	NaN	NaN	6.96	NaN	-0.1	NaN	NaN	NaN	NaN	NaN	NaN	6.31	35.463	0.89295
15.05	NaN	-0.275	NaN	NaN	NaN	7.02	NaN	-0.25	NaN	NaN	NaN	NaN	NaN	NaN	6.33	35.6	0.85174
15.09	NaN	-0.336	NaN	NaN	NaN	7.025	NaN	NaN	NaN	NaN	NaN	NaN	NaN	NaN	6.37	35.876	0.83487
15.13	NaN	-0.323	NaN	NaN	NaN	7.055	NaN	NaN	NaN	NaN	NaN	NaN	NaN	NaN	6.39	36.013	0.81991
15.17	NaN	-0.475	NaN	NaN	NaN	7.06	NaN	-0.01	NaN	NaN	NaN	NaN	NaN	NaN	6.41	36.15	0.89024
15.21	NaN	-0.353	NaN	NaN	NaN	7.105	NaN	NaN	NaN	NaN	NaN	NaN	NaN	NaN	6.43	36.285	0.80499
15.29	NaN	-0.325	NaN	NaN	NaN	7.11	NaN	-0.11	NaN	NaN	NaN	NaN	NaN	NaN	6.45	36.42	0.82879
15.37	NaN	-0.409	NaN	NaN	NaN	7.155	NaN	NaN	NaN	NaN	NaN	NaN	NaN	NaN	6.49	36.69	0.93404
15.49	NaN	-0.372	NaN	NaN	NaN	7.16	NaN	-0.01	NaN	NaN	NaN	NaN	NaN	NaN	6.51	36.826	0.31154
15.61	NaN	-0.241	NaN	NaN	NaN	7.205	NaN	NaN	NaN	NaN	NaN	NaN	NaN	NaN	6.53	36.963	0.17425
15.65	NaN	-0.51	NaN	NaN	NaN	7.21	NaN	-0.07	NaN	NaN	NaN	NaN	NaN	NaN	6.55	37.099	0.39515
15.69	NaN	-0.237	NaN	NaN	NaN	7.255	NaN	NaN	NaN	NaN	NaN	NaN	NaN	NaN	6.57	37.236	0.38882
15.73	NaN	-0.391	NaN	NaN	NaN	7.26	NaN	0.03	NaN	NaN	NaN	NaN	NaN	NaN	6.59	37.373	0.82788
15.81	NaN	-0.382	NaN	NaN	NaN	7.305	NaN	NaN	NaN	NaN	NaN	NaN	NaN	NaN	6.61	37.53	0.81546
15.85	NaN	-0.322	NaN	NaN	NaN	7.31	NaN	0.15	NaN	NaN	NaN	NaN	NaN	NaN	6.63	37.709	0.86131
15.89	NaN	-0.202	NaN	NaN	NaN	7.355	NaN	NaN	NaN	NaN	NaN	NaN	NaN	NaN	6.6525	37.911	0.87186
15.97	NaN	-0.147	NaN	NaN	NaN	7.36	NaN	0.05	NaN	NaN	NaN	NaN	NaN	NaN	6.6725	38.09	0.80963
16.01	NaN	-0.195	NaN	NaN	NaN	7.405	NaN	NaN	NaN	NaN	NaN	NaN	NaN	NaN	6.6925	38.268	0.92978
16.05	NaN	-0.122	NaN	NaN	NaN	7.41	NaN	0.08	NaN	NaN	NaN	NaN	NaN	NaN	6.7125	38.43	1.0229
16.17	NaN	-0.149	NaN	NaN	NaN	7.455	NaN	NaN	NaN	NaN	NaN	NaN	NaN	NaN	6.7325	38.581	0.87632
16.21	NaN	-0.068	NaN	NaN	NaN	7.46	NaN	-0.03	NaN	NaN	NaN	NaN	NaN	NaN	6.7525	38.732	0.93933
16.25	NaN	-0.268	NaN	NaN	NaN	7.505	NaN	NaN	NaN	NaN	NaN	NaN	NaN	NaN	6.7725	38.883	0.83807
16.29	NaN	-0.121	NaN	NaN	NaN	7.51	NaN	0.07	NaN	NaN	NaN	NaN	NaN	NaN	6.8325	39.338	0.2635
16.33	NaN	-0.232	NaN	NaN	NaN	7.555	NaN	NaN	NaN	NaN	NaN	NaN	NaN	NaN	6.8525	39.49	1.155
16.37	NaN	-0.222	NaN	NaN	NaN	7.56	NaN	0.02	NaN	NaN	NaN	NaN	NaN	NaN	6.8725	39.641	0.36571
16.41	NaN	-0.188	NaN	NaN	NaN	7.605	NaN	NaN	NaN	NaN	NaN	NaN	NaN	NaN	6.8925	39.793	0.46675
16.45	NaN	-0.246	NaN	NaN	NaN	7.61	NaN	-0.1	NaN	NaN	NaN	NaN	NaN	NaN	6.9125	39.967	0.40782
16.49	NaN	-0.273	NaN	NaN	NaN	7.655	NaN	NaN	NaN	NaN	NaN	NaN	NaN	NaN	6.9725	40.526	0.87396
16.53	NaN	-0.418	NaN	NaN	NaN	7.66	NaN	-0.01	NaN	NaN	NaN	NaN	NaN	NaN	6.9925	40.712	0.42233
16.57	NaN	-0.385	NaN	NaN	NaN	7.705	NaN	NaN	NaN	NaN	NaN	NaN	NaN	NaN	7.0125	40.874	0.4497
16.61	NaN	-0.47	NaN	NaN	NaN	7.71	NaN	-0.16	NaN	NaN	NaN	NaN	NaN	NaN	7.0525	41.167	0.63507
16.65	NaN	-0.321	NaN	NaN	NaN	7.755	NaN	NaN	NaN	NaN	NaN	NaN	NaN	NaN	7.0725	41.314	0.12943
16.69	NaN	-0.198	NaN	NaN	NaN	7.76	NaN	-0.17	NaN	NaN	NaN	NaN	NaN	NaN	7.0925	41.461	0.37623
16.77	NaN	-0.232	NaN	NaN	NaN	7.805	NaN	NaN	NaN	NaN	NaN	NaN	NaN	NaN	7.1125	41.608	0.43191
16.81	NaN	-0.191	NaN	NaN	NaN	7.81	NaN	-0.26	NaN	NaN	NaN	NaN	NaN	NaN	7.1325	41.754	0.43798
16.85	NaN	-0.282	NaN	NaN	NaN	7.855	NaN	NaN	NaN	NaN	NaN	NaN	NaN	NaN	7.1725	42.047	0.11549
16.89	NaN	-0.181	NaN	NaN	NaN	7.86	NaN	-0.31	NaN	NaN	NaN	NaN	NaN	NaN	7.1925	42.193	0.46036
16.93	NaN	-0.371	NaN	NaN	NaN	7.905	NaN	NaN	NaN	NaN	NaN	NaN	NaN	NaN	7.2125	42.338	0.83185
16.97	NaN	-0.285	NaN	NaN	NaN	7.91	NaN	-0.43	NaN	NaN	NaN	NaN	NaN	NaN	7.2325	42.482	0.69527
17.01	NaN	-0.272	NaN	NaN	NaN	7.955	NaN	NaN	NaN	NaN	NaN	NaN	NaN	NaN	7.2525	42.626	0.74164
17.05	NaN	-0.166	NaN	NaN	NaN	7.96	NaN	-0.24	NaN	NaN	NaN	NaN	NaN	NaN	7.2725	42.769	0.80369
17.09	NaN	-0.151	NaN	NaN	NaN	7.995	NaN	NaN	NaN	NaN	NaN	NaN	NaN	NaN	7.2925	42.913	0.56186
17.13	NaN	-0.266	NaN	NaN	NaN	8.005	NaN	NaN	NaN	NaN	NaN	NaN	NaN	NaN	7.3125	NaN	0.63942
17.17	NaN	-0.275	NaN	NaN	NaN	8.01	NaN	-0.22	NaN	NaN	NaN	NaN	NaN	NaN	7.3325	NaN	0.43505
17.21	NaN	-0.241	NaN	NaN	NaN	8.055	NaN	NaN	NaN	NaN	NaN	NaN	NaN	NaN	7.3525	NaN	0.50784
17.25	NaN	-0.24	NaN	NaN	NaN	8.06	NaN	-0.37	NaN	NaN	NaN	NaN	NaN	NaN	7.3725	NaN	0.70749
17.29	NaN	-0.244	NaN	NaN	NaN	8.095	NaN	NaN	NaN	NaN	NaN	NaN	NaN	NaN	7.3925	NaN	0.68848
17.33	NaN	-0.372	NaN	NaN	NaN	8.1	NaN	-0.26	NaN	NaN	NaN	NaN	NaN	NaN	7.4125	NaN	0.71754
17.37	NaN	-0.218	NaN	NaN	NaN	8.155	NaN	NaN	NaN	NaN	NaN	NaN	NaN	NaN	7.4325	NaN	0.87683
17.41	NaN	-0.397	NaN	NaN	NaN	8.16	NaN	-0.24	NaN	NaN	NaN	NaN	NaN	NaN	7.4525	NaN	0.85305
17.45	NaN	-0.217	NaN	NaN	NaN	8.205	NaN	NaN	NaN	NaN	NaN	NaN	NaN	NaN	7.4725	NaN	0.99422
17.49	NaN	-0.308	NaN	NaN	NaN	8.21	NaN	-0.34	NaN	NaN	NaN	NaN	NaN	NaN	7.5125	NaN	0.92302
17.53	NaN	-0.183	NaN	NaN	NaN	8.255	NaN	NaN	NaN	NaN	NaN	NaN	NaN	NaN	7.5325	NaN	1.091
17.57	NaN	-0.265	NaN	NaN	NaN	8.26	NaN	-0.37	NaN	NaN	NaN	NaN	NaN	NaN	7.5525	NaN	0.85467
17.61	NaN	-0.236	NaN	NaN	NaN	8.305	NaN	NaN	NaN	NaN	NaN	NaN	NaN	NaN	7.5725	NaN	0.48309
17.65	NaN	-0.215	NaN	NaN	NaN	8.31	NaN	-0.39	NaN	NaN	NaN	NaN	NaN	NaN	7.5925	NaN	0.67436
17.69	NaN	-0.171	NaN	NaN	NaN	8.355	NaN	NaN	NaN	NaN	NaN	NaN	NaN	NaN	7.6125	NaN	0.68929
17.73	NaN	-0.24	NaN	NaN	NaN	8.36	NaN	-0.28	NaN	NaN	NaN	NaN	NaN	NaN	7.6325	NaN	0.60862
17.77	NaN	-0.245	NaN	NaN	NaN	8.395	NaN	NaN	NaN	NaN	NaN	NaN	NaN	NaN	7.6525	NaN	0.6506
17.81	NaN	-0.321	NaN	NaN	NaN	8.4	NaN	-0.39	NaN	NaN	NaN	NaN	NaN	NaN	7.6925	NaN	0.34258
17.85	NaN	-0.562	NaN	NaN	NaN	8.455	NaN	NaN	NaN	NaN	NaN	NaN	NaN	NaN	7.7125	NaN	0.18139
17.93	NaN	-0.194	NaN	NaN	NaN	8.46	NaN	-0.47	NaN	NaN	NaN	NaN	NaN	NaN	7.7325	NaN	0.45118
17.97	NaN	-0.289	NaN	NaN	NaN	8.505	NaN	NaN	NaN	NaN	NaN	NaN	NaN	NaN	7.7525	NaN	0.4908
18.01	NaN	-0.162	NaN	NaN	NaN	8.51	NaN	-0.42	NaN	NaN	NaN	NaN	NaN	NaN	7.7725	NaN	0.23784
18.05	NaN	-0.115	NaN	NaN	NaN	8.555	NaN	NaN	NaN	NaN	NaN	NaN	NaN	NaN	7.7925	NaN	0.16183
18.09	NaN	-0.086	NaN	NaN	NaN	8.56	NaN	-0.44	NaN	NaN	NaN	NaN	NaN	NaN	7.8125	NaN	0.50115
18.13	NaN	-0.218	NaN	NaN	NaN	8.595	NaN	NaN	NaN	NaN	NaN	NaN	NaN	NaN	7.8325	NaN	0.56131
18.17	NaN	-0.179	NaN	NaN	NaN	8.605	NaN	NaN	NaN	NaN	NaN	NaN	NaN	NaN	7.8525	NaN	0.81154
18.21	NaN	-0.132	NaN	NaN	NaN	8.61	NaN	-0.25	NaN	NaN	NaN	NaN	NaN	NaN	7.8725	NaN	0.72564
18.25	NaN	-0.185	NaN	NaN	NaN	8.655	NaN	NaN	NaN	NaN	NaN	NaN	NaN	NaN	7.8925	NaN	0.8352
18.29	NaN	-0.26	NaN	NaN	NaN	8.66	NaN	-0.33	NaN	NaN	NaN	NaN	NaN	NaN	7.9125	NaN	0.6449
18.37	NaN	-0.174	NaN	NaN	NaN	8.705	NaN	NaN	NaN	NaN	NaN	NaN	NaN	NaN	7.9325	NaN	0.80186
18.41	NaN	-0.201	NaN	NaN	NaN	8.71	NaN	-0.24	NaN	NaN	NaN	NaN	NaN	NaN	7.9525	NaN	0.85211
18.45	NaN	-0.428	NaN	NaN	NaN	8.755	NaN	NaN	NaN	NaN	NaN	NaN	NaN	NaN	7.9725	NaN	0.8214
18.49	NaN	-0.277	NaN	NaN	NaN	8.76	NaN	-0.19	NaN	NaN	NaN	NaN	NaN	NaN	7.9925	NaN	0.73437
18.53	NaN	-0.291	NaN	NaN	NaN	8.805	NaN	NaN	NaN	NaN	NaN	NaN	NaN	NaN	8.0125	NaN	0.76944
18.57	NaN	-0.201	NaN	NaN	NaN	8.81	NaN	-0.18	NaN	NaN	NaN	NaN	NaN	NaN	8.0325	NaN	0.83779
18.61	NaN	-0.197	NaN	NaN	NaN	8.855	NaN	NaN	NaN	NaN	NaN	NaN	NaN	NaN	8.0525	NaN	0.81381
18.65	NaN	-0.338	NaN	NaN	NaN	8.86	NaN	-0.28	NaN	NaN	NaN	NaN	NaN	NaN	8.0725	NaN	1.0138
18.69	NaN	-0.38	NaN	NaN	NaN	8.905	NaN	NaN	NaN	NaN	NaN	NaN	NaN	NaN	8.0925	NaN	0.86101
18.73	NaN	-0.263	NaN	NaN	NaN	8.91	NaN	-0.36	NaN	NaN	NaN	NaN	NaN	NaN	8.1125	NaN	1.0026
18.77	NaN	-0.321	NaN	NaN	NaN	8.955	NaN	NaN	NaN	NaN	NaN	NaN	NaN	NaN	8.1325	NaN	0.98975
18.81	NaN	-0.29	NaN	NaN	NaN	8.96	NaN	-0.34	NaN	NaN	NaN	NaN	NaN	NaN	8.1525	NaN	0.73915
18.85	NaN	-0.303	NaN	NaN	NaN	9.035	NaN	NaN	NaN	NaN	NaN	NaN	NaN	NaN	8.1725	NaN	0.74714
18.89	NaN	-0.288	NaN	NaN	NaN	9.045	NaN	NaN	NaN	NaN	NaN	NaN	NaN	NaN	8.1925	NaN	0.71435
18.93	NaN	-0.324	NaN	NaN	NaN	9.05	NaN	-0.13	NaN	NaN	NaN	NaN	NaN	NaN	8.2125	NaN	0.89115
18.97	NaN	-0.297	NaN	NaN	NaN	9.09	NaN	-0.65	NaN	NaN	NaN	NaN	NaN	NaN	8.2325	NaN	0.4699
19.01	NaN	-0.342	NaN	NaN	NaN	9.105	NaN	NaN	NaN	NaN	NaN	NaN	NaN	NaN	8.2525	NaN	0.64496
19.05	NaN	-0.4	NaN	NaN	NaN	9.11	NaN	0	NaN	NaN	NaN	NaN	NaN	NaN	8.2725	NaN	0.73055
19.09	NaN	-0.335	NaN	NaN	NaN	9.155	NaN	NaN	NaN	NaN	NaN	NaN	NaN	NaN	8.2925	NaN	0.50439
19.13	NaN	-0.395	NaN	NaN	NaN	9.16	NaN	-0.08	NaN	NaN	NaN	NaN	NaN	NaN	8.3125	NaN	0.56606
19.17	NaN	-0.287	NaN	NaN	NaN	9.205	NaN	NaN	NaN	NaN	NaN	NaN	NaN	NaN	8.3325	NaN	0.47096
19.21	NaN	-0.203	NaN	NaN	NaN	9.21	NaN	-0.09	NaN	NaN	NaN	NaN	NaN	NaN	8.3525	NaN	0.50361
19.25	NaN	-0.368	NaN	NaN	NaN	9.255	NaN	NaN	NaN	NaN	NaN	NaN	NaN	NaN	8.3725	NaN	0.6428
19.29	NaN	-0.378	NaN	NaN	NaN	9.26	NaN	-0.01	NaN	NaN	NaN	NaN	NaN	NaN	8.3925	NaN	0.54281
19.33	NaN	-0.216	NaN	NaN	NaN	9.305	NaN	NaN	NaN	NaN	NaN	NaN	NaN	NaN	8.4125	NaN	0.62666
19.37	NaN	-0.27	NaN	NaN	NaN	9.31	NaN	0.04	NaN	NaN	NaN	NaN	NaN	NaN	8.4325	NaN	0.58821
19.41	NaN	-0.303	NaN	NaN	NaN	9.365	NaN	NaN	NaN	NaN	NaN	NaN	NaN	NaN	8.4525	NaN	0.60167
19.43	NaN	-0.27	NaN	NaN	NaN	9.37	NaN	-0.08	NaN	NaN	NaN	NaN	NaN	NaN	8.4725	NaN	0.68567
19.45	NaN	-0.442	NaN	NaN	NaN	9.415	NaN	NaN	NaN	NaN	NaN	NaN	NaN	NaN	8.4925	NaN	0.54094
19.49	NaN	-0.335	NaN	NaN	NaN	9.42	NaN	-0.06	NaN	NaN	NaN	NaN	NaN	NaN	8.5125	NaN	0.65372
19.53	NaN	-0.298	NaN	NaN	NaN	9.46	NaN	-0.15	NaN	NaN	NaN	NaN	NaN	NaN	8.5325	NaN	0.68192
19.57	NaN	-0.359	NaN	NaN	NaN	9.51	NaN	0.01	NaN	NaN	NaN	NaN	NaN	NaN	8.5525	NaN	0.66937
19.61	NaN	-0.437	NaN	NaN	NaN	NaN	NaN	NaN	NaN	NaN	NaN	NaN	NaN	NaN	8.5725	NaN	0.76057
19.65	NaN	-0.469	NaN	NaN	NaN	NaN	NaN	NaN	NaN	NaN	NaN	NaN	NaN	NaN	8.5925	NaN	0.79545
19.69	NaN	-0.38	NaN	NaN	NaN	NaN	NaN	NaN	NaN	NaN	NaN	NaN	NaN	NaN	8.6125	NaN	0.73298
19.73	NaN	-0.479	NaN	NaN	NaN	NaN	NaN	NaN	NaN	NaN	NaN	NaN	NaN	NaN	8.6325	NaN	0.78613
19.77	NaN	-0.342	NaN	NaN	NaN	NaN	NaN	NaN	NaN	NaN	NaN	NaN	NaN	NaN	8.6525	NaN	0.72351
19.81	NaN	-0.39	NaN	NaN	NaN	NaN	NaN	NaN	NaN	NaN	NaN	NaN	NaN	NaN	8.6725	NaN	0.65857
19.85	NaN	-0.436	NaN	NaN	NaN	NaN	NaN	NaN	NaN	NaN	NaN	NaN	NaN	NaN	8.6925	NaN	0.59076
19.89	NaN	-0.503	NaN	NaN	NaN	NaN	NaN	NaN	NaN	NaN	NaN	NaN	NaN	NaN	8.7125	NaN	0.70023
19.93	NaN	-0.496	NaN	NaN	NaN	NaN	NaN	NaN	NaN	NaN	NaN	NaN	NaN	NaN	8.7325	NaN	0.79946
19.97	NaN	-0.439	NaN	NaN	NaN	NaN	NaN	NaN	NaN	NaN	NaN	NaN	NaN	NaN	8.7525	NaN	0.71068
20.01	NaN	-0.437	NaN	NaN	NaN	NaN	NaN	NaN	NaN	NaN	NaN	NaN	NaN	NaN	8.7725	NaN	0.8373
20.05	NaN	-0.349	NaN	NaN	NaN	NaN	NaN	NaN	NaN	NaN	NaN	NaN	NaN	NaN	8.7925	NaN	0.73974
20.09	NaN	-0.357	NaN	NaN	NaN	NaN	NaN	NaN	NaN	NaN	NaN	NaN	NaN	NaN	8.8125	NaN	0.74341
20.13	NaN	-0.234	NaN	NaN	NaN	NaN	NaN	NaN	NaN	NaN	NaN	NaN	NaN	NaN	8.8325	NaN	0.65202
20.17	NaN	-0.402	NaN	NaN	NaN	NaN	NaN	NaN	NaN	NaN	NaN	NaN	NaN	NaN	8.8525	NaN	0.75631
20.21	NaN	-0.079	NaN	NaN	NaN	NaN	NaN	NaN	NaN	NaN	NaN	NaN	NaN	NaN	8.8725	NaN	0.70162
20.25	NaN	-0.363	NaN	NaN	NaN	NaN	NaN	NaN	NaN	NaN	NaN	NaN	NaN	NaN	8.8925	NaN	0.68869
20.29	NaN	-0.417	NaN	NaN	NaN	NaN	NaN	NaN	NaN	NaN	NaN	NaN	NaN	NaN	NaN	NaN	NaN
20.33	NaN	-0.274	NaN	NaN	NaN	NaN	NaN	NaN	NaN	NaN	NaN	NaN	NaN	NaN	NaN	NaN	NaN
20.37	NaN	-0.242	NaN	NaN	NaN	NaN	NaN	NaN	NaN	NaN	NaN	NaN	NaN	NaN	NaN	NaN	NaN
20.41	NaN	-0.187	NaN	NaN	NaN	NaN	NaN	NaN	NaN	NaN	NaN	NaN	NaN	NaN	NaN	NaN	NaN
20.45	NaN	-0.174	NaN	NaN	NaN	NaN	NaN	NaN	NaN	NaN	NaN	NaN	NaN	NaN	NaN	NaN	NaN
20.49	NaN	-0.182	NaN	NaN	NaN	NaN	NaN	NaN	NaN	NaN	NaN	NaN	NaN	NaN	NaN	NaN	NaN
20.53	NaN	-0.155	NaN	NaN	NaN	NaN	NaN	NaN	NaN	NaN	NaN	NaN	NaN	NaN	NaN	NaN	NaN
20.57	NaN	-0.309	NaN	NaN	NaN	NaN	NaN	NaN	NaN	NaN	NaN	NaN	NaN	NaN	NaN	NaN	NaN
20.61	NaN	-0.322	NaN	NaN	NaN	NaN	NaN	NaN	NaN	NaN	NaN	NaN	NaN	NaN	NaN	NaN	NaN
20.65	NaN	-0.332	NaN	NaN	NaN	NaN	NaN	NaN	NaN	NaN	NaN	NaN	NaN	NaN	NaN	NaN	NaN
20.69	NaN	-0.399	NaN	NaN	NaN	NaN	NaN	NaN	NaN	NaN	NaN	NaN	NaN	NaN	NaN	NaN	NaN
20.77	NaN	-0.203	NaN	NaN	NaN	NaN	NaN	NaN	NaN	NaN	NaN	NaN	NaN	NaN	NaN	NaN	NaN
20.85	NaN	-0.27	NaN	NaN	NaN	NaN	NaN	NaN	NaN	NaN	NaN	NaN	NaN	NaN	NaN	NaN	NaN
20.89	NaN	-0.388	NaN	NaN	NaN	NaN	NaN	NaN	NaN	NaN	NaN	NaN	NaN	NaN	NaN	NaN	NaN
20.93	NaN	-0.47	NaN	NaN	NaN	NaN	NaN	NaN	NaN	NaN	NaN	NaN	NaN	NaN	NaN	NaN	NaN
20.97	NaN	-0.836	NaN	NaN	NaN	NaN	NaN	NaN	NaN	NaN	NaN	NaN	NaN	NaN	NaN	NaN	NaN
21.01	NaN	-0.312	NaN	NaN	NaN	NaN	NaN	NaN	NaN	NaN	NaN	NaN	NaN	NaN	NaN	NaN	NaN
21.05	NaN	-0.327	NaN	NaN	NaN	NaN	NaN	NaN	NaN	NaN	NaN	NaN	NaN	NaN	NaN	NaN	NaN
21.09	NaN	-0.58	NaN	NaN	NaN	NaN	NaN	NaN	NaN	NaN	NaN	NaN	NaN	NaN	NaN	NaN	NaN
21.13	NaN	-0.458	NaN	NaN	NaN	NaN	NaN	NaN	NaN	NaN	NaN	NaN	NaN	NaN	NaN	NaN	NaN
21.17	NaN	-0.758	NaN	NaN	NaN	NaN	NaN	NaN	NaN	NaN	NaN	NaN	NaN	NaN	NaN	NaN	NaN
21.21	NaN	-0.384	NaN	NaN	NaN	NaN	NaN	NaN	NaN	NaN	NaN	NaN	NaN	NaN	NaN	NaN	NaN
21.25	NaN	-0.647	NaN	NaN	NaN	NaN	NaN	NaN	NaN	NaN	NaN	NaN	NaN	NaN	NaN	NaN	NaN
21.29	NaN	-0.4	NaN	NaN	NaN	NaN	NaN	NaN	NaN	NaN	NaN	NaN	NaN	NaN	NaN	NaN	NaN
21.33	NaN	-0.756	NaN	NaN	NaN	NaN	NaN	NaN	NaN	NaN	NaN	NaN	NaN	NaN	NaN	NaN	NaN
21.45	NaN	-0.72	NaN	NaN	NaN	NaN	NaN	NaN	NaN	NaN	NaN	NaN	NaN	NaN	NaN	NaN	NaN
21.49	NaN	-0.319	NaN	NaN	NaN	NaN	NaN	NaN	NaN	NaN	NaN	NaN	NaN	NaN	NaN	NaN	NaN
21.53	NaN	-0.399	NaN	NaN	NaN	NaN	NaN	NaN	NaN	NaN	NaN	NaN	NaN	NaN	NaN	NaN	NaN
21.57	NaN	-0.469	NaN	NaN	NaN	NaN	NaN	NaN	NaN	NaN	NaN	NaN	NaN	NaN	NaN	NaN	NaN
21.61	NaN	-0.364	NaN	NaN	NaN	NaN	NaN	NaN	NaN	NaN	NaN	NaN	NaN	NaN	NaN	NaN	NaN
21.65	NaN	-0.484	NaN	NaN	NaN	NaN	NaN	NaN	NaN	NaN	NaN	NaN	NaN	NaN	NaN	NaN	NaN
21.69	NaN	-0.299	NaN	NaN	NaN	NaN	NaN	NaN	NaN	NaN	NaN	NaN	NaN	NaN	NaN	NaN	NaN
21.77	NaN	-0.519	NaN	NaN	NaN	NaN	NaN	NaN	NaN	NaN	NaN	NaN	NaN	NaN	NaN	NaN	NaN
21.81	NaN	-0.467	NaN	NaN	NaN	NaN	NaN	NaN	NaN	NaN	NaN	NaN	NaN	NaN	NaN	NaN	NaN
21.85	NaN	-0.532	NaN	NaN	NaN	NaN	NaN	NaN	NaN	NaN	NaN	NaN	NaN	NaN	NaN	NaN	NaN
21.89	NaN	-0.534	NaN	NaN	NaN	NaN	NaN	NaN	NaN	NaN	NaN	NaN	NaN	NaN	NaN	NaN	NaN
21.93	NaN	-0.401	NaN	NaN	NaN	NaN	NaN	NaN	NaN	NaN	NaN	NaN	NaN	NaN	NaN	NaN	NaN
21.97	NaN	-0.515	NaN	NaN	NaN	NaN	NaN	NaN	NaN	NaN	NaN	NaN	NaN	NaN	NaN	NaN	NaN
22.01	NaN	-0.522	NaN	NaN	NaN	NaN	NaN	NaN	NaN	NaN	NaN	NaN	NaN	NaN	NaN	NaN	NaN
22.05	NaN	-0.542	NaN	NaN	NaN	NaN	NaN	NaN	NaN	NaN	NaN	NaN	NaN	NaN	NaN	NaN	NaN
22.09	NaN	-0.426	NaN	NaN	NaN	NaN	NaN	NaN	NaN	NaN	NaN	NaN	NaN	NaN	NaN	NaN	NaN
22.13	NaN	-0.521	NaN	NaN	NaN	NaN	NaN	NaN	NaN	NaN	NaN	NaN	NaN	NaN	NaN	NaN	NaN
22.17	NaN	-0.639	NaN	NaN	NaN	NaN	NaN	NaN	NaN	NaN	NaN	NaN	NaN	NaN	NaN	NaN	NaN
22.21	NaN	-0.635	NaN	NaN	NaN	NaN	NaN	NaN	NaN	NaN	NaN	NaN	NaN	NaN	NaN	NaN	NaN
22.29	NaN	-0.639	NaN	NaN	NaN	NaN	NaN	NaN	NaN	NaN	NaN	NaN	NaN	NaN	NaN	NaN	NaN
22.41	NaN	-0.495	NaN	NaN	NaN	NaN	NaN	NaN	NaN	NaN	NaN	NaN	NaN	NaN	NaN	NaN	NaN
22.45	NaN	-0.727	NaN	NaN	NaN	NaN	NaN	NaN	NaN	NaN	NaN	NaN	NaN	NaN	NaN	NaN	NaN
22.49	NaN	-0.581	NaN	NaN	NaN	NaN	NaN	NaN	NaN	NaN	NaN	NaN	NaN	NaN	NaN	NaN	NaN
22.53	NaN	-0.685	NaN	NaN	NaN	NaN	NaN	NaN	NaN	NaN	NaN	NaN	NaN	NaN	NaN	NaN	NaN
22.57	NaN	-0.685	NaN	NaN	NaN	NaN	NaN	NaN	NaN	NaN	NaN	NaN	NaN	NaN	NaN	NaN	NaN
22.61	NaN	-0.747	NaN	NaN	NaN	NaN	NaN	NaN	NaN	NaN	NaN	NaN	NaN	NaN	NaN	NaN	NaN
22.65	NaN	-0.799	NaN	NaN	NaN	NaN	NaN	NaN	NaN	NaN	NaN	NaN	NaN	NaN	NaN	NaN	NaN
22.77	NaN	-0.703	NaN	NaN	NaN	NaN	NaN	NaN	NaN	NaN	NaN	NaN	NaN	NaN	NaN	NaN	NaN
22.85	NaN	-0.774	NaN	NaN	NaN	NaN	NaN	NaN	NaN	NaN	NaN	NaN	NaN	NaN	NaN	NaN	NaN
22.89	NaN	-0.623	NaN	NaN	NaN	NaN	NaN	NaN	NaN	NaN	NaN	NaN	NaN	NaN	NaN	NaN	NaN
22.93	NaN	-0.705	NaN	NaN	NaN	NaN	NaN	NaN	NaN	NaN	NaN	NaN	NaN	NaN	NaN	NaN	NaN
22.97	NaN	-0.736	NaN	NaN	NaN	NaN	NaN	NaN	NaN	NaN	NaN	NaN	NaN	NaN	NaN	NaN	NaN
23.01	NaN	-0.732	NaN	NaN	NaN	NaN	NaN	NaN	NaN	NaN	NaN	NaN	NaN	NaN	NaN	NaN	NaN
23.05	NaN	-0.879	NaN	NaN	NaN	NaN	NaN	NaN	NaN	NaN	NaN	NaN	NaN	NaN	NaN	NaN	NaN
23.09	NaN	-0.813	NaN	NaN	NaN	NaN	NaN	NaN	NaN	NaN	NaN	NaN	NaN	NaN	NaN	NaN	NaN
23.13	NaN	-0.694	NaN	NaN	NaN	NaN	NaN	NaN	NaN	NaN	NaN	NaN	NaN	NaN	NaN	NaN	NaN
23.17	NaN	-0.64	NaN	NaN	NaN	NaN	NaN	NaN	NaN	NaN	NaN	NaN	NaN	NaN	NaN	NaN	NaN
23.21	NaN	-0.545	NaN	NaN	NaN	NaN	NaN	NaN	NaN	NaN	NaN	NaN	NaN	NaN	NaN	NaN	NaN
23.25	NaN	-0.969	NaN	NaN	NaN	NaN	NaN	NaN	NaN	NaN	NaN	NaN	NaN	NaN	NaN	NaN	NaN
23.29	NaN	-0.648	NaN	NaN	NaN	NaN	NaN	NaN	NaN	NaN	NaN	NaN	NaN	NaN	NaN	NaN	NaN
23.33	NaN	-0.81	NaN	NaN	NaN	NaN	NaN	NaN	NaN	NaN	NaN	NaN	NaN	NaN	NaN	NaN	NaN
23.37	NaN	-0.749	NaN	NaN	NaN	NaN	NaN	NaN	NaN	NaN	NaN	NaN	NaN	NaN	NaN	NaN	NaN
23.49	NaN	-0.832	NaN	NaN	NaN	NaN	NaN	NaN	NaN	NaN	NaN	NaN	NaN	NaN	NaN	NaN	NaN
23.53	NaN	-0.864	NaN	NaN	NaN	NaN	NaN	NaN	NaN	NaN	NaN	NaN	NaN	NaN	NaN	NaN	NaN
23.57	NaN	-0.807	NaN	NaN	NaN	NaN	NaN	NaN	NaN	NaN	NaN	NaN	NaN	NaN	NaN	NaN	NaN
23.61	NaN	-0.839	NaN	NaN	NaN	NaN	NaN	NaN	NaN	NaN	NaN	NaN	NaN	NaN	NaN	NaN	NaN
23.65	NaN	-0.71	NaN	NaN	NaN	NaN	NaN	NaN	NaN	NaN	NaN	NaN	NaN	NaN	NaN	NaN	NaN
23.73	NaN	-0.655	NaN	NaN	NaN	NaN	NaN	NaN	NaN	NaN	NaN	NaN	NaN	NaN	NaN	NaN	NaN
23.77	NaN	-0.965	NaN	NaN	NaN	NaN	NaN	NaN	NaN	NaN	NaN	NaN	NaN	NaN	NaN	NaN	NaN
23.79	NaN	-0.622	NaN	NaN	NaN	NaN	NaN	NaN	NaN	NaN	NaN	NaN	NaN	NaN	NaN	NaN	NaN
23.83	NaN	-0.644	NaN	NaN	NaN	NaN	NaN	NaN	NaN	NaN	NaN	NaN	NaN	NaN	NaN	NaN	NaN
23.91	NaN	-0.636	NaN	NaN	NaN	NaN	NaN	NaN	NaN	NaN	NaN	NaN	NaN	NaN	NaN	NaN	NaN
23.95	NaN	-0.738	NaN	NaN	NaN	NaN	NaN	NaN	NaN	NaN	NaN	NaN	NaN	NaN	NaN	NaN	NaN
23.99	NaN	-0.548	NaN	NaN	NaN	NaN	NaN	NaN	NaN	NaN	NaN	NaN	NaN	NaN	NaN	NaN	NaN
24.07	NaN	-0.864	NaN	NaN	NaN	NaN	NaN	NaN	NaN	NaN	NaN	NaN	NaN	NaN	NaN	NaN	NaN
24.11	NaN	-0.708	NaN	NaN	NaN	NaN	NaN	NaN	NaN	NaN	NaN	NaN	NaN	NaN	NaN	NaN	NaN
24.23	NaN	-0.901	NaN	NaN	NaN	NaN	NaN	NaN	NaN	NaN	NaN	NaN	NaN	NaN	NaN	NaN	NaN
24.27	NaN	-0.619	NaN	NaN	NaN	NaN	NaN	NaN	NaN	NaN	NaN	NaN	NaN	NaN	NaN	NaN	NaN
24.31	NaN	-0.948	NaN	NaN	NaN	NaN	NaN	NaN	NaN	NaN	NaN	NaN	NaN	NaN	NaN	NaN	NaN
24.39	NaN	-0.736	NaN	NaN	NaN	NaN	NaN	NaN	NaN	NaN	NaN	NaN	NaN	NaN	NaN	NaN	NaN
24.43	NaN	-0.749	NaN	NaN	NaN	NaN	NaN	NaN	NaN	NaN	NaN	NaN	NaN	NaN	NaN	NaN	NaN
24.47	NaN	-0.723	NaN	NaN	NaN	NaN	NaN	NaN	NaN	NaN	NaN	NaN	NaN	NaN	NaN	NaN	NaN
24.51	NaN	-0.963	NaN	NaN	NaN	NaN	NaN	NaN	NaN	NaN	NaN	NaN	NaN	NaN	NaN	NaN	NaN
24.67	NaN	-0.795	NaN	NaN	NaN	NaN	NaN	NaN	NaN	NaN	NaN	NaN	NaN	NaN	NaN	NaN	NaN
24.71	NaN	-0.627	NaN	NaN	NaN	NaN	NaN	NaN	NaN	NaN	NaN	NaN	NaN	NaN	NaN	NaN	NaN
24.75	NaN	-0.622	NaN	NaN	NaN	NaN	NaN	NaN	NaN	NaN	NaN	NaN	NaN	NaN	NaN	NaN	NaN
24.79	NaN	-0.793	NaN	NaN	NaN	NaN	NaN	NaN	NaN	NaN	NaN	NaN	NaN	NaN	NaN	NaN	NaN
24.83	NaN	-0.772	NaN	NaN	NaN	NaN	NaN	NaN	NaN	NaN	NaN	NaN	NaN	NaN	NaN	NaN	NaN
24.91	NaN	-0.747	NaN	NaN	NaN	NaN	NaN	NaN	NaN	NaN	NaN	NaN	NaN	NaN	NaN	NaN	NaN
25.15	NaN	-0.709	NaN	NaN	NaN	NaN	NaN	NaN	NaN	NaN	NaN	NaN	NaN	NaN	NaN	NaN	NaN
25.19	NaN	-0.565	NaN	NaN	NaN	NaN	NaN	NaN	NaN	NaN	NaN	NaN	NaN	NaN	NaN	NaN	NaN
25.23	NaN	-0.685	NaN	NaN	NaN	NaN	NaN	NaN	NaN	NaN	NaN	NaN	NaN	NaN	NaN	NaN	NaN
25.27	NaN	-0.858	NaN	NaN	NaN	NaN	NaN	NaN	NaN	NaN	NaN	NaN	NaN	NaN	NaN	NaN	NaN
25.31	NaN	-0.688	NaN	NaN	NaN	NaN	NaN	NaN	NaN	NaN	NaN	NaN	NaN	NaN	NaN	NaN	NaN
25.39	NaN	-0.715	NaN	NaN	NaN	NaN	NaN	NaN	NaN	NaN	NaN	NaN	NaN	NaN	NaN	NaN	NaN
25.47	NaN	-0.67	NaN	NaN	NaN	NaN	NaN	NaN	NaN	NaN	NaN	NaN	NaN	NaN	NaN	NaN	NaN
25.51	NaN	-0.738	NaN	NaN	NaN	NaN	NaN	NaN	NaN	NaN	NaN	NaN	NaN	NaN	NaN	NaN	NaN
25.59	NaN	-0.815	NaN	NaN	NaN	NaN	NaN	NaN	NaN	NaN	NaN	NaN	NaN	NaN	NaN	NaN	NaN
