# Supplementary material for: Deglacial carbon cycle changes observed in a compilation of 117 benthic δ 13 C time series (20–6 ka)
Source: Copernicus journal article supplement (doi:10.5194/cp-2018-25), 2018-03-15
Supplement: Supplementary file 13 [file ISA_sites.xls]

## Sheet: ISA_sites
V29-135			CHN115-70			MD96-2080			ODP1088			V30-40			GeoB3104			BT4			KNR159-36			RC16-119
0.03	0.63762	1.43	0.05	4.2454	0.33	0	NaN	0.85	0.02	0.013611	0.93	0.02	2.6539	0.55	0.01	1.0653	1.33	0.05	0.010653	1.11	0	2.7222	1.301	0.05	3.1583	1.282
0.055	1.7234	1.4	0.19	6.7609	0.43	0.04	2.6143	1.06	0.1	3.0003	0.87	0.07	7.3386	0.44	0.04	1.6549	1.022	0.1	2.2816	1.14	0.05	4.531	1.355	0.15	5.4251	1.285
0.08	1.9852	1.37	0.29	9.1688	0.15	0.1	7.4307	0.95	0.2	7.4815	0.72	0.12	10.967	0.53	0.08	2.3207	1.139	0.15	3.8708	1.04	0.1	6.3931	1.302	0.15	5.4251	1.337
0.105	2.189	1.49	0.39	11.197	0.09	0.2	12.394	0.67	0.3	11.155	0.69	0.17	12.827	0.09	0.12	2.8145	1.077	0.2	6.1611	1.1	0.15	8.2601	1.318	0.25	8.6317	0.49
0.13	2.6267	1.31	0.5	12.44	0.2	0.3	17.748	0.77	0.4	15.291	0.66	0.22	15.082	0.52	0.16	3.3368	1.129	0.25	8.3938	0.95	0.2	9.658	0.356	0.25	8.6317	1.151
0.155	3.2438	1.21	0.59	13.224	0.03	0.4	21.161	0.71	0.5	20.951	0.18	0.27	18.348	0.28	0.2	3.8718	1.14	0.3	10.492	1.22	0.25	11.127	0.636	0.35	10.975	0.844
0.18	3.8304	1.31	0.69	14.093	0.1	0.5	24.984	0.88	0.6	25.997	0.28	0.32	21.176	0.28	0.24	4.4104	1.216	0.38	13.083	0.82	0.275	12.006	NaN	0.45	13.141	0.341
0.205	4.3514	NaN	0.79	17.586	-0.06	0.6	30.479	1.05	0.7	30.567	0.52	0.37	24.693	0.44	0.28	5.0361	1.088	0.4	13.665	0.69	0.3	12.768	NaN	0.45	13.141	0.43
0.23	5.2505	1.07	0.9	18.487	0.24	0.6	30.479	0.74	0.8	34.399	0.72	0.42	29.423	0.38	0.32	5.6554	1.142	0.45	15.707	0.63	0.35	14.109	0.458	0.65	15.377	0.075
0.255	6.3085	1.31	0.99	19.836	0.19	0.7	37.559	0.96	0.9	36.685	0.63	0.47	34.264	0.44	0.36	6.3236	1.172	0.48	17.016	1	0.4	14.986	0.285	0.65	15.377	0.327
0.28	6.5137	1.15	1.09	22.207	0.16	0.82	NaN	0.71	1	39.452	0.37	0.52	39.27	0.54	0.4	6.9946	0.932	0.55	18.892	1.04	0.45	15.711	0.12	0.75	16.546	0.406
0.305	6.7969	1.24	1.19	23.781	0	0.9	NaN	0.61	1.1	40.04	0.74	0.57	NaN	0.51	0.44	7.6474	1.036	0.6	19.995	1.05	0.55	16.671	1.088	0.75	16.546	0.525
0.33	7.9857	1.06	1.29	25.501	0.07	1	NaN	0.83	1.2	NaN	0.64	0.62	NaN	0.33	0.48	8.2234	0.729	0.65	20.987	0.98	0.7	17.925	0.603	0.85	18.101	0.652
0.355	8.3777	1.1	1.49	30.851	0.02	1.1	NaN	0.88	1.3	NaN	0.49	0.67	NaN	0.16	0.48	8.2234	1.137	0.7	21.908	1.03	0.75	18.297	NaN	0.95	19.331	0.735
0.38	8.5927	1.15	1.59	34.115	0.02	1.1	NaN	0.9	1.4	NaN	0.49	0.72	NaN	0.72	0.52	8.7676	1.062	0.75	22.848	0.96	0.75	18.297	0.498	0.95	19.331	0.764
0.405	9.5645	1.07	1.69	37.054	0.19	1.2	NaN	0.71	1.5	NaN	0.74	0.77	NaN	0.74	0.56	9.3365	1.001	0.82	24.237	0.94	0.8	18.643	0.229	1.05	20.504	0.152
0.43	9.7246	1.16	1.79	40.569	0.19	1.2	NaN	0.83	1.6	NaN	0.9	0.82	NaN	0.57	0.6	9.9628	1.056	0.85	24.754	1.01	0.85	18.946	0.436	1.05	20.504	0.681
0.455	10.693	NaN	1.89	NaN	0.01	1.3	NaN	0.41	1.7	NaN	0.78	0.87	NaN	0.65	0.64	10.563	0.973	0.9	25.574	0.94	0.9	19.236	0.264	1.15	21.659	0.751
0.48	11.137	0.94	NaN	NaN	NaN	1.4	NaN	0.68	1.8	NaN	0.67	0.92	NaN	0.42	0.68	11.023	1.068	0.95	26.457	1.03	1	19.852	0.603	1.25	22.808	0.388
0.505	11.244	0.92	NaN	NaN	NaN	1.4	NaN	0.29	1.9	NaN	0.44	0.97	NaN	0.66	0.72	11.388	0.821	1	27.46	1.04	1.05	20.214	0.503	1.25	22.808	0.799
0.53	11.349	NaN	NaN	NaN	NaN	NaN	NaN	NaN	2	NaN	0.43	1.07	NaN	0.6	0.8	12.077	0.94	1.05	28.612	1.06	1.1	20.573	0.58	1.35	23.78	0.514
0.555	11.455	0.89	NaN	NaN	NaN	NaN	NaN	NaN	2.1	NaN	0.73	1.12	NaN	0.55	0.84	12.413	1	1.12	30.818	0.82	1.15	20.928	0.644	1.45	24.511	0.271
0.58	11.984	1.02	NaN	NaN	NaN	NaN	NaN	NaN	2.2	NaN	0.67	1.17	NaN	0.49	0.88	12.862	0.886	1.16	31.868	1.05	1.2	21.397	0.271	1.45	24.511	0.321
0.605	12.299	1.18	NaN	NaN	NaN	NaN	NaN	NaN	2.3	NaN	0.86	1.22	NaN	0.37	0.92	13.302	NaN	1.2	32.815	0.87	1.25	22.509	0.476	1.55	25.428	0.379
0.63	12.392	0.99	NaN	NaN	NaN	NaN	NaN	NaN	2.4	NaN	0.53	1.27	NaN	0.67	0.92	13.302	0.9	1.25	33.91	1.01	1.275	23.568	NaN	1.65	26.8	0.54
0.655	12.458	1.12	NaN	NaN	NaN	NaN	NaN	NaN	2.5	NaN	0.65	1.32	NaN	0.44	0.96	13.767	0.779	1.3	34.853	1.12	1.3	24.349	0.829	1.75	28.279	0.518
0.68	12.523	1.04	NaN	NaN	NaN	NaN	NaN	NaN	2.6	NaN	0.57	1.37	NaN	0.11	1	14.18	NaN	1.35	35.859	0.84	1.35	25.516	0.591	1.85	29.616	-999
0.705	12.589	NaN	NaN	NaN	NaN	NaN	NaN	NaN	2.7	NaN	0.49	1.5	NaN	0	1.04	14.559	NaN	1.4	NaN	0.9	1.4	26.793	0.679	1.85	29.616	0.71
0.73	12.662	NaN	NaN	NaN	NaN	NaN	NaN	NaN	2.8	NaN	0.22	1.57	NaN	0.05	1.08	14.924	NaN	NaN	NaN	NaN	1.45	27.675	0.553	1.95	30.662	-999
0.755	12.847	1.05	NaN	NaN	NaN	NaN	NaN	NaN	2.9	NaN	0.23	1.67	NaN	-0.08	1.08	14.924	NaN	NaN	NaN	NaN	1.5	28.498	1.038	1.95	30.662	0.336
0.78	13.167	1.04	NaN	NaN	NaN	NaN	NaN	NaN	3	NaN	0.37	1.72	NaN	-0.1	1.12	15.29	NaN	NaN	NaN	NaN	1.55	29.211	0.898	2.05	31.566	0.25
0.805	13.243	1.27	NaN	NaN	NaN	NaN	NaN	NaN	3.1	NaN	0.03	1.77	NaN	-0.06	1.12	15.29	NaN	NaN	NaN	NaN	1.6	29.782	0.808	NaN	NaN	NaN
0.83	13.315	0.83	NaN	NaN	NaN	NaN	NaN	NaN	3.2	NaN	0.01	1.82	NaN	0.19	1.16	15.677	NaN	NaN	NaN	NaN	1.65	30.314	1.175	NaN	NaN	NaN
0.855	13.545	NaN	NaN	NaN	NaN	NaN	NaN	NaN	3.3	NaN	-0.07	1.87	NaN	0.18	1.2	16.06	NaN	NaN	NaN	NaN	1.7	30.804	0.628	NaN	NaN	NaN
0.88	13.827	0.62	NaN	NaN	NaN	NaN	NaN	NaN	3.4	NaN	0.14	1.92	NaN	0.2	1.2	16.06	NaN	NaN	NaN	NaN	1.75	31.281	0.967	NaN	NaN	NaN
0.905	13.902	NaN	NaN	NaN	NaN	NaN	NaN	NaN	3.5	NaN	-0.04	1.97	NaN	-0.1	1.24	16.441	NaN	NaN	NaN	NaN	1.8	31.796	1.068	NaN	NaN	NaN
0.93	13.982	NaN	NaN	NaN	NaN	NaN	NaN	NaN	3.6	NaN	-0.06	2.07	NaN	-0.05	1.28	16.812	NaN	NaN	NaN	NaN	1.9	33.621	0.766	NaN	NaN	NaN
0.955	14.062	NaN	NaN	NaN	NaN	NaN	NaN	NaN	3.7	NaN	0.16	2.12	NaN	0.38	1.32	17.217	NaN	NaN	NaN	NaN	1.95	34.23	0.907	NaN	NaN	NaN
0.98	14.28	NaN	NaN	NaN	NaN	NaN	NaN	NaN	3.8	NaN	0.19	2.17	NaN	0.48	1.32	17.217	NaN	NaN	NaN	NaN	2	34.857	1.01	NaN	NaN	NaN
1.005	14.919	NaN	NaN	NaN	NaN	NaN	NaN	NaN	3.9	NaN	0.2	2.22	NaN	0.21	1.36	17.647	NaN	NaN	NaN	NaN	NaN	NaN	NaN	NaN	NaN	NaN
1.03	15.356	0.7	NaN	NaN	NaN	NaN	NaN	NaN	4	NaN	0.3	2.27	NaN	0.11	1.36	17.647	NaN	NaN	NaN	NaN	NaN	NaN	NaN	NaN	NaN	NaN
1.055	15.692	NaN	NaN	NaN	NaN	NaN	NaN	NaN	4.1	NaN	0.11	2.32	NaN	0.26	1.41	18.166	NaN	NaN	NaN	NaN	NaN	NaN	NaN	NaN	NaN	NaN
1.08	16.321	0.81	NaN	NaN	NaN	NaN	NaN	NaN	4.2	NaN	0.12	2.37	NaN	0.42	1.44	18.466	NaN	NaN	NaN	NaN	NaN	NaN	NaN	NaN	NaN	NaN
1.105	17.313	NaN	NaN	NaN	NaN	NaN	NaN	NaN	4.3	NaN	0.1	2.42	NaN	0.16	1.48	18.919	NaN	NaN	NaN	NaN	NaN	NaN	NaN	NaN	NaN	NaN
1.13	17.681	0.79	NaN	NaN	NaN	NaN	NaN	NaN	4.4	NaN	0.35	2.47	NaN	0.18	1.52	19.376	NaN	NaN	NaN	NaN	NaN	NaN	NaN	NaN	NaN	NaN
1.155	17.823	NaN	NaN	NaN	NaN	NaN	NaN	NaN	4.5	NaN	0.48	2.57	NaN	0.09	1.56	19.835	NaN	NaN	NaN	NaN	NaN	NaN	NaN	NaN	NaN	NaN
1.18	17.999	0.87	NaN	NaN	NaN	NaN	NaN	NaN	4.6	NaN	0.58	2.62	NaN	-0.02	1.6	20.283	NaN	NaN	NaN	NaN	NaN	NaN	NaN	NaN	NaN	NaN
1.205	18.102	NaN	NaN	NaN	NaN	NaN	NaN	NaN	4.7	NaN	0.32	2.67	NaN	0	1.64	20.695	NaN	NaN	NaN	NaN	NaN	NaN	NaN	NaN	NaN	NaN
1.23	18.23	NaN	NaN	NaN	NaN	NaN	NaN	NaN	4.8	NaN	0.3	2.72	NaN	0.22	1.64	20.695	NaN	NaN	NaN	NaN	NaN	NaN	NaN	NaN	NaN	NaN
1.255	18.359	NaN	NaN	NaN	NaN	NaN	NaN	NaN	4.9	NaN	0.74	2.77	NaN	0.28	1.68	21.079	NaN	NaN	NaN	NaN	NaN	NaN	NaN	NaN	NaN	NaN
1.28	18.483	NaN	NaN	NaN	NaN	NaN	NaN	NaN	5	NaN	0.88	2.82	NaN	0.41	1.72	21.459	NaN	NaN	NaN	NaN	NaN	NaN	NaN	NaN	NaN	NaN
1.305	18.602	NaN	NaN	NaN	NaN	NaN	NaN	NaN	5.1	NaN	0.04	2.87	NaN	0.45	1.76	21.837	NaN	NaN	NaN	NaN	NaN	NaN	NaN	NaN	NaN	NaN
1.33	18.741	1.01	NaN	NaN	NaN	NaN	NaN	NaN	5.2	NaN	0.21	2.92	NaN	0.27	1.8	22.157	NaN	NaN	NaN	NaN	NaN	NaN	NaN	NaN	NaN	NaN
1.355	18.862	NaN	NaN	NaN	NaN	NaN	NaN	NaN	5.3	NaN	0.3	3.02	NaN	0.4	1.84	22.467	NaN	NaN	NaN	NaN	NaN	NaN	NaN	NaN	NaN	NaN
1.38	18.981	0.71	NaN	NaN	NaN	NaN	NaN	NaN	5.4	NaN	0.19	3.07	NaN	0.38	1.88	22.756	NaN	NaN	NaN	NaN	NaN	NaN	NaN	NaN	NaN	NaN
1.405	19.177	NaN	NaN	NaN	NaN	NaN	NaN	NaN	5.5	NaN	0.33	3.13	NaN	0.21	1.92	23.028	NaN	NaN	NaN	NaN	NaN	NaN	NaN	NaN	NaN	NaN
1.43	19.547	0.97	NaN	NaN	NaN	NaN	NaN	NaN	5.6	NaN	0.21	3.17	NaN	-0.25	1.96	23.292	NaN	NaN	NaN	NaN	NaN	NaN	NaN	NaN	NaN	NaN
1.455	19.698	NaN	NaN	NaN	NaN	NaN	NaN	NaN	5.7	NaN	0.13	3.22	NaN	0.21	2	23.591	NaN	NaN	NaN	NaN	NaN	NaN	NaN	NaN	NaN	NaN
1.48	19.861	0.83	NaN	NaN	NaN	NaN	NaN	NaN	5.8	NaN	-0.05	3.27	NaN	0.17	2.04	23.98	NaN	NaN	NaN	NaN	NaN	NaN	NaN	NaN	NaN	NaN
1.505	20.116	NaN	NaN	NaN	NaN	NaN	NaN	NaN	5.9	NaN	-0.09	3.32	NaN	0.15	2.08	24.372	NaN	NaN	NaN	NaN	NaN	NaN	NaN	NaN	NaN	NaN
1.53	20.836	0.98	NaN	NaN	NaN	NaN	NaN	NaN	6	NaN	-0.4	3.37	NaN	0.22	2.12	24.724	NaN	NaN	NaN	NaN	NaN	NaN	NaN	NaN	NaN	NaN
1.555	21.033	NaN	NaN	NaN	NaN	NaN	NaN	NaN	6.1	NaN	-0.34	3.42	NaN	-0.17	2.16	25.069	0.834	NaN	NaN	NaN	NaN	NaN	NaN	NaN	NaN	NaN
1.58	21.136	0.85	NaN	NaN	NaN	NaN	NaN	NaN	6.2	NaN	-0.02	3.47	NaN	-0.06	2.2	25.409	NaN	NaN	NaN	NaN	NaN	NaN	NaN	NaN	NaN	NaN
1.605	21.284	NaN	NaN	NaN	NaN	NaN	NaN	NaN	6.3	NaN	0.47	3.57	NaN	-0.21	2.24	25.751	NaN	NaN	NaN	NaN	NaN	NaN	NaN	NaN	NaN	NaN
1.63	21.428	0.89	NaN	NaN	NaN	NaN	NaN	NaN	6.4	NaN	0.47	3.62	NaN	0.13	2.24	25.751	NaN	NaN	NaN	NaN	NaN	NaN	NaN	NaN	NaN	NaN
1.655	21.769	0.99	NaN	NaN	NaN	NaN	NaN	NaN	6.5	NaN	0.27	3.67	NaN	0.13	2.28	26.116	0.791	NaN	NaN	NaN	NaN	NaN	NaN	NaN	NaN	NaN
1.68	22.106	0.86	NaN	NaN	NaN	NaN	NaN	NaN	6.6	NaN	0.12	3.72	NaN	0.58	2.32	26.496	NaN	NaN	NaN	NaN	NaN	NaN	NaN	NaN	NaN	NaN
1.705	22.244	0.96	NaN	NaN	NaN	NaN	NaN	NaN	6.7	NaN	0.2	3.77	NaN	0.34	2.36	26.898	NaN	NaN	NaN	NaN	NaN	NaN	NaN	NaN	NaN	NaN
1.73	22.503	0.85	NaN	NaN	NaN	NaN	NaN	NaN	6.8	NaN	0.26	3.82	NaN	0.7	2.4	27.326	NaN	NaN	NaN	NaN	NaN	NaN	NaN	NaN	NaN	NaN
1.755	22.804	0.89	NaN	NaN	NaN	NaN	NaN	NaN	6.9	NaN	0.07	3.87	NaN	0.56	2.44	27.761	NaN	NaN	NaN	NaN	NaN	NaN	NaN	NaN	NaN	NaN
1.78	22.955	NaN	NaN	NaN	NaN	NaN	NaN	NaN	7	NaN	0.31	3.92	NaN	0.61	2.48	28.233	NaN	NaN	NaN	NaN	NaN	NaN	NaN	NaN	NaN	NaN
1.805	23.101	0.83	NaN	NaN	NaN	NaN	NaN	NaN	7.1	NaN	0.47	3.97	NaN	0.56	2.52	28.77	NaN	NaN	NaN	NaN	NaN	NaN	NaN	NaN	NaN	NaN
1.83	23.228	0.83	NaN	NaN	NaN	NaN	NaN	NaN	7.2	NaN	0.69	4.07	NaN	0.72	2.56	29.258	NaN	NaN	NaN	NaN	NaN	NaN	NaN	NaN	NaN	NaN
1.855	23.323	NaN	NaN	NaN	NaN	NaN	NaN	NaN	7.3	NaN	0.4	4.12	NaN	0.62	2.6	29.788	NaN	NaN	NaN	NaN	NaN	NaN	NaN	NaN	NaN	NaN
1.88	23.418	0.93	NaN	NaN	NaN	NaN	NaN	NaN	7.4	NaN	0.07	4.17	NaN	0.55	2.64	30.346	NaN	NaN	NaN	NaN	NaN	NaN	NaN	NaN	NaN	NaN
1.905	23.642	0.86	NaN	NaN	NaN	NaN	NaN	NaN	7.7	NaN	0.05	4.22	NaN	0.53	2.68	30.875	NaN	NaN	NaN	NaN	NaN	NaN	NaN	NaN	NaN	NaN
1.93	23.879	NaN	NaN	NaN	NaN	NaN	NaN	NaN	7.8	NaN	0.05	4.27	NaN	0.48	2.68	30.875	NaN	NaN	NaN	NaN	NaN	NaN	NaN	NaN	NaN	NaN
1.955	24.269	0.99	NaN	NaN	NaN	NaN	NaN	NaN	7.9	NaN	-0.19	4.32	NaN	0.59	2.72	31.352	NaN	NaN	NaN	NaN	NaN	NaN	NaN	NaN	NaN	NaN
1.98	24.452	NaN	NaN	NaN	NaN	NaN	NaN	NaN	8	NaN	0.03	4.37	NaN	0.35	NaN	NaN	NaN	NaN	NaN	NaN	NaN	NaN	NaN	NaN	NaN	NaN
2.005	24.548	NaN	NaN	NaN	NaN	NaN	NaN	NaN	8.1	NaN	-0.05	4.42	NaN	0.07	NaN	NaN	NaN	NaN	NaN	NaN	NaN	NaN	NaN	NaN	NaN	NaN
2.03	24.714	NaN	NaN	NaN	NaN	NaN	NaN	NaN	8.2	NaN	-0.09	4.5	NaN	0.21	NaN	NaN	NaN	NaN	NaN	NaN	NaN	NaN	NaN	NaN	NaN	NaN
2.055	24.957	NaN	NaN	NaN	NaN	NaN	NaN	NaN	8.3	NaN	0.1	4.57	NaN	0.14	NaN	NaN	NaN	NaN	NaN	NaN	NaN	NaN	NaN	NaN	NaN	NaN
2.08	25.167	0.93	NaN	NaN	NaN	NaN	NaN	NaN	8.4	NaN	0.08	4.62	NaN	0.21	NaN	NaN	NaN	NaN	NaN	NaN	NaN	NaN	NaN	NaN	NaN	NaN
2.105	25.35	NaN	NaN	NaN	NaN	NaN	NaN	NaN	8.5	NaN	0.36	4.67	NaN	0.18	NaN	NaN	NaN	NaN	NaN	NaN	NaN	NaN	NaN	NaN	NaN	NaN
2.13	25.443	1.08	NaN	NaN	NaN	NaN	NaN	NaN	8.6	NaN	0.57	4.72	NaN	0.3	NaN	NaN	NaN	NaN	NaN	NaN	NaN	NaN	NaN	NaN	NaN	NaN
2.155	25.573	1.02	NaN	NaN	NaN	NaN	NaN	NaN	8.7	NaN	0.51	4.77	NaN	0.09	NaN	NaN	NaN	NaN	NaN	NaN	NaN	NaN	NaN	NaN	NaN	NaN
2.18	25.963	0.94	NaN	NaN	NaN	NaN	NaN	NaN	8.8	NaN	0.44	4.82	NaN	1.04	NaN	NaN	NaN	NaN	NaN	NaN	NaN	NaN	NaN	NaN	NaN	NaN
2.205	26.396	NaN	NaN	NaN	NaN	NaN	NaN	NaN	8.9	NaN	0.3	4.87	NaN	0.63	NaN	NaN	NaN	NaN	NaN	NaN	NaN	NaN	NaN	NaN	NaN	NaN
2.23	26.544	0.99	NaN	NaN	NaN	NaN	NaN	NaN	9	NaN	0.84	4.97	NaN	0.51	NaN	NaN	NaN	NaN	NaN	NaN	NaN	NaN	NaN	NaN	NaN	NaN
2.255	26.668	0.89	NaN	NaN	NaN	NaN	NaN	NaN	9.1	NaN	0.6	5.02	NaN	0.91	NaN	NaN	NaN	NaN	NaN	NaN	NaN	NaN	NaN	NaN	NaN	NaN
2.28	26.77	NaN	NaN	NaN	NaN	NaN	NaN	NaN	9.2	NaN	0.8	5.17	NaN	1	NaN	NaN	NaN	NaN	NaN	NaN	NaN	NaN	NaN	NaN	NaN	NaN
2.305	26.891	NaN	NaN	NaN	NaN	NaN	NaN	NaN	9.3	NaN	0.87	5.22	NaN	0.96	NaN	NaN	NaN	NaN	NaN	NaN	NaN	NaN	NaN	NaN	NaN	NaN
2.33	26.998	1	NaN	NaN	NaN	NaN	NaN	NaN	9.4	NaN	0.55	5.27	NaN	0.31	NaN	NaN	NaN	NaN	NaN	NaN	NaN	NaN	NaN	NaN	NaN	NaN
2.355	27.089	0.95	NaN	NaN	NaN	NaN	NaN	NaN	9.6	NaN	0.46	5.57	NaN	0.55	NaN	NaN	NaN	NaN	NaN	NaN	NaN	NaN	NaN	NaN	NaN	NaN
2.38	27.177	0.9	NaN	NaN	NaN	NaN	NaN	NaN	10.1	NaN	0.24	5.62	NaN	0.42	NaN	NaN	NaN	NaN	NaN	NaN	NaN	NaN	NaN	NaN	NaN	NaN
2.405	27.487	0.96	NaN	NaN	NaN	NaN	NaN	NaN	10.2	NaN	0.12	5.67	NaN	0.93	NaN	NaN	NaN	NaN	NaN	NaN	NaN	NaN	NaN	NaN	NaN	NaN
2.43	27.969	0.79	NaN	NaN	NaN	NaN	NaN	NaN	10.3	NaN	-0.07	5.72	NaN	1.1	NaN	NaN	NaN	NaN	NaN	NaN	NaN	NaN	NaN	NaN	NaN	NaN
2.455	28.148	NaN	NaN	NaN	NaN	NaN	NaN	NaN	10.4	NaN	0.27	5.77	NaN	0.63	NaN	NaN	NaN	NaN	NaN	NaN	NaN	NaN	NaN	NaN	NaN	NaN
2.48	28.248	NaN	NaN	NaN	NaN	NaN	NaN	NaN	10.5	NaN	0.84	5.82	NaN	0.93	NaN	NaN	NaN	NaN	NaN	NaN	NaN	NaN	NaN	NaN	NaN	NaN
2.505	28.369	0.88	NaN	NaN	NaN	NaN	NaN	NaN	10.6	NaN	1.07	5.87	NaN	0.71	NaN	NaN	NaN	NaN	NaN	NaN	NaN	NaN	NaN	NaN	NaN	NaN
2.53	29.1	0.98	NaN	NaN	NaN	NaN	NaN	NaN	10.7	NaN	1	5.92	NaN	0.59	NaN	NaN	NaN	NaN	NaN	NaN	NaN	NaN	NaN	NaN	NaN	NaN
2.555	29.827	NaN	NaN	NaN	NaN	NaN	NaN	NaN	10.8	NaN	1	5.97	NaN	0.82	NaN	NaN	NaN	NaN	NaN	NaN	NaN	NaN	NaN	NaN	NaN	NaN
2.58	30.067	0.91	NaN	NaN	NaN	NaN	NaN	NaN	10.9	NaN	0.73	6.02	NaN	0.7	NaN	NaN	NaN	NaN	NaN	NaN	NaN	NaN	NaN	NaN	NaN	NaN
2.605	30.246	NaN	NaN	NaN	NaN	NaN	NaN	NaN	11	NaN	0.31	6.07	NaN	0.93	NaN	NaN	NaN	NaN	NaN	NaN	NaN	NaN	NaN	NaN	NaN	NaN
2.63	30.418	1.05	NaN	NaN	NaN	NaN	NaN	NaN	11.1	NaN	0.06	6.12	NaN	0.71	NaN	NaN	NaN	NaN	NaN	NaN	NaN	NaN	NaN	NaN	NaN	NaN
2.655	30.677	NaN	NaN	NaN	NaN	NaN	NaN	NaN	11.2	NaN	0.66	6.17	NaN	0.85	NaN	NaN	NaN	NaN	NaN	NaN	NaN	NaN	NaN	NaN	NaN	NaN
2.68	30.808	1.02	NaN	NaN	NaN	NaN	NaN	NaN	11.4	NaN	0.59	6.22	NaN	-0.07	NaN	NaN	NaN	NaN	NaN	NaN	NaN	NaN	NaN	NaN	NaN	NaN
2.705	30.93	NaN	NaN	NaN	NaN	NaN	NaN	NaN	11.5	NaN	0.04	6.27	NaN	0.57	NaN	NaN	NaN	NaN	NaN	NaN	NaN	NaN	NaN	NaN	NaN	NaN
2.73	31.095	NaN	NaN	NaN	NaN	NaN	NaN	NaN	11.6	NaN	0.63	6.32	NaN	0.25	NaN	NaN	NaN	NaN	NaN	NaN	NaN	NaN	NaN	NaN	NaN	NaN
2.755	31.859	NaN	NaN	NaN	NaN	NaN	NaN	NaN	11.7	NaN	0.34	6.37	NaN	0.49	NaN	NaN	NaN	NaN	NaN	NaN	NaN	NaN	NaN	NaN	NaN	NaN
2.78	32.501	0.91	NaN	NaN	NaN	NaN	NaN	NaN	11.8	NaN	0.78	6.47	NaN	0.38	NaN	NaN	NaN	NaN	NaN	NaN	NaN	NaN	NaN	NaN	NaN	NaN
2.805	32.61	NaN	NaN	NaN	NaN	NaN	NaN	NaN	11.9	NaN	0.27	6.52	NaN	0.18	NaN	NaN	NaN	NaN	NaN	NaN	NaN	NaN	NaN	NaN	NaN	NaN
2.83	32.686	NaN	NaN	NaN	NaN	NaN	NaN	NaN	12	NaN	-0.17	6.57	NaN	0.09	NaN	NaN	NaN	NaN	NaN	NaN	NaN	NaN	NaN	NaN	NaN	NaN
2.855	32.763	1.01	NaN	NaN	NaN	NaN	NaN	NaN	12.1	NaN	-0.01	6.67	NaN	0.25	NaN	NaN	NaN	NaN	NaN	NaN	NaN	NaN	NaN	NaN	NaN	NaN
2.88	32.839	0.88	NaN	NaN	NaN	NaN	NaN	NaN	12.2	NaN	-0.32	6.72	NaN	0.61	NaN	NaN	NaN	NaN	NaN	NaN	NaN	NaN	NaN	NaN	NaN	NaN
2.905	32.915	0.88	NaN	NaN	NaN	NaN	NaN	NaN	12.3	NaN	-0.14	6.77	NaN	0.66	NaN	NaN	NaN	NaN	NaN	NaN	NaN	NaN	NaN	NaN	NaN	NaN
2.93	33.001	NaN	NaN	NaN	NaN	NaN	NaN	NaN	12.4	NaN	-0.24	6.82	NaN	0.34	NaN	NaN	NaN	NaN	NaN	NaN	NaN	NaN	NaN	NaN	NaN	NaN
2.955	33.581	NaN	NaN	NaN	NaN	NaN	NaN	NaN	12.5	NaN	-0.28	6.87	NaN	0.58	NaN	NaN	NaN	NaN	NaN	NaN	NaN	NaN	NaN	NaN	NaN	NaN
2.98	33.847	0.98	NaN	NaN	NaN	NaN	NaN	NaN	12.6	NaN	0.14	6.92	NaN	0.44	NaN	NaN	NaN	NaN	NaN	NaN	NaN	NaN	NaN	NaN	NaN	NaN
3.005	33.99	0.98	NaN	NaN	NaN	NaN	NaN	NaN	12.7	NaN	0.67	7.02	NaN	0.37	NaN	NaN	NaN	NaN	NaN	NaN	NaN	NaN	NaN	NaN	NaN	NaN
3.03	34.054	0.97	NaN	NaN	NaN	NaN	NaN	NaN	12.8	NaN	0.66	7.07	NaN	0.3	NaN	NaN	NaN	NaN	NaN	NaN	NaN	NaN	NaN	NaN	NaN	NaN
3.055	34.113	NaN	NaN	NaN	NaN	NaN	NaN	NaN	12.9	NaN	-0.12	7.17	NaN	0.61	NaN	NaN	NaN	NaN	NaN	NaN	NaN	NaN	NaN	NaN	NaN	NaN
3.08	34.173	NaN	NaN	NaN	NaN	NaN	NaN	NaN	13	NaN	0.06	7.22	NaN	0.26	NaN	NaN	NaN	NaN	NaN	NaN	NaN	NaN	NaN	NaN	NaN	NaN
3.105	34.319	1.06	NaN	NaN	NaN	NaN	NaN	NaN	13.1	NaN	0.4	7.27	NaN	-0.22	NaN	NaN	NaN	NaN	NaN	NaN	NaN	NaN	NaN	NaN	NaN	NaN
3.13	34.743	1	NaN	NaN	NaN	NaN	NaN	NaN	13.2	NaN	0.18	7.32	NaN	-0.02	NaN	NaN	NaN	NaN	NaN	NaN	NaN	NaN	NaN	NaN	NaN	NaN
3.155	35.221	0.87	NaN	NaN	NaN	NaN	NaN	NaN	13.3	NaN	-0.4	7.37	NaN	0.17	NaN	NaN	NaN	NaN	NaN	NaN	NaN	NaN	NaN	NaN	NaN	NaN
3.18	35.504	NaN	NaN	NaN	NaN	NaN	NaN	NaN	13.4	NaN	-0.28	7.42	NaN	-0.1	NaN	NaN	NaN	NaN	NaN	NaN	NaN	NaN	NaN	NaN	NaN	NaN
3.205	35.594	NaN	NaN	NaN	NaN	NaN	NaN	NaN	13.5	NaN	-0.36	7.47	NaN	0.26	NaN	NaN	NaN	NaN	NaN	NaN	NaN	NaN	NaN	NaN	NaN	NaN
3.23	35.661	NaN	NaN	NaN	NaN	NaN	NaN	NaN	13.6	NaN	-0.13	7.52	NaN	0.36	NaN	NaN	NaN	NaN	NaN	NaN	NaN	NaN	NaN	NaN	NaN	NaN
3.255	35.729	NaN	NaN	NaN	NaN	NaN	NaN	NaN	13.7	NaN	-0.06	7.57	NaN	0.3	NaN	NaN	NaN	NaN	NaN	NaN	NaN	NaN	NaN	NaN	NaN	NaN
3.28	35.796	0.97	NaN	NaN	NaN	NaN	NaN	NaN	13.8	NaN	0.25	7.67	NaN	-0.21	NaN	NaN	NaN	NaN	NaN	NaN	NaN	NaN	NaN	NaN	NaN	NaN
3.305	35.756	0.87	NaN	NaN	NaN	NaN	NaN	NaN	13.9	NaN	0.45	7.72	NaN	-0.09	NaN	NaN	NaN	NaN	NaN	NaN	NaN	NaN	NaN	NaN	NaN	NaN
3.33	35.535	0.87	NaN	NaN	NaN	NaN	NaN	NaN	14	NaN	0.02	7.77	NaN	-0.02	NaN	NaN	NaN	NaN	NaN	NaN	NaN	NaN	NaN	NaN	NaN	NaN
3.355	35.66	NaN	NaN	NaN	NaN	NaN	NaN	NaN	NaN	NaN	NaN	7.82	NaN	0.03	NaN	NaN	NaN	NaN	NaN	NaN	NaN	NaN	NaN	NaN	NaN	NaN
3.38	35.796	1	NaN	NaN	NaN	NaN	NaN	NaN	NaN	NaN	NaN	7.87	NaN	-1.13	NaN	NaN	NaN	NaN	NaN	NaN	NaN	NaN	NaN	NaN	NaN	NaN
3.405	36.214	0.98	NaN	NaN	NaN	NaN	NaN	NaN	NaN	NaN	NaN	7.92	NaN	-0.03	NaN	NaN	NaN	NaN	NaN	NaN	NaN	NaN	NaN	NaN	NaN	NaN
3.43	36.762	0.91	NaN	NaN	NaN	NaN	NaN	NaN	NaN	NaN	NaN	7.97	NaN	-0.27	NaN	NaN	NaN	NaN	NaN	NaN	NaN	NaN	NaN	NaN	NaN	NaN
3.455	37.02	NaN	NaN	NaN	NaN	NaN	NaN	NaN	NaN	NaN	NaN	8.07	NaN	0.06	NaN	NaN	NaN	NaN	NaN	NaN	NaN	NaN	NaN	NaN	NaN	NaN
3.48	37.183	NaN	NaN	NaN	NaN	NaN	NaN	NaN	NaN	NaN	NaN	8.12	NaN	0.19	NaN	NaN	NaN	NaN	NaN	NaN	NaN	NaN	NaN	NaN	NaN	NaN
3.505	37.382	NaN	NaN	NaN	NaN	NaN	NaN	NaN	NaN	NaN	NaN	8.17	NaN	0.15	NaN	NaN	NaN	NaN	NaN	NaN	NaN	NaN	NaN	NaN	NaN	NaN
3.53	37.451	NaN	NaN	NaN	NaN	NaN	NaN	NaN	NaN	NaN	NaN	8.22	NaN	0.2	NaN	NaN	NaN	NaN	NaN	NaN	NaN	NaN	NaN	NaN	NaN	NaN
3.555	37.511	NaN	NaN	NaN	NaN	NaN	NaN	NaN	NaN	NaN	NaN	8.27	NaN	0.42	NaN	NaN	NaN	NaN	NaN	NaN	NaN	NaN	NaN	NaN	NaN	NaN
3.58	37.572	0.98	NaN	NaN	NaN	NaN	NaN	NaN	NaN	NaN	NaN	8.32	NaN	0.69	NaN	NaN	NaN	NaN	NaN	NaN	NaN	NaN	NaN	NaN	NaN	NaN
3.605	37.633	NaN	NaN	NaN	NaN	NaN	NaN	NaN	NaN	NaN	NaN	8.36	NaN	0.32	NaN	NaN	NaN	NaN	NaN	NaN	NaN	NaN	NaN	NaN	NaN	NaN
3.63	37.694	NaN	NaN	NaN	NaN	NaN	NaN	NaN	NaN	NaN	NaN	8.52	NaN	0.56	NaN	NaN	NaN	NaN	NaN	NaN	NaN	NaN	NaN	NaN	NaN	NaN
3.655	37.912	NaN	NaN	NaN	NaN	NaN	NaN	NaN	NaN	NaN	NaN	8.57	NaN	0.73	NaN	NaN	NaN	NaN	NaN	NaN	NaN	NaN	NaN	NaN	NaN	NaN
3.68	38.268	1.01	NaN	NaN	NaN	NaN	NaN	NaN	NaN	NaN	NaN	8.62	NaN	0.38	NaN	NaN	NaN	NaN	NaN	NaN	NaN	NaN	NaN	NaN	NaN	NaN
3.705	38.35	NaN	NaN	NaN	NaN	NaN	NaN	NaN	NaN	NaN	NaN	8.67	NaN	0.29	NaN	NaN	NaN	NaN	NaN	NaN	NaN	NaN	NaN	NaN	NaN	NaN
3.73	38.42	0.88	NaN	NaN	NaN	NaN	NaN	NaN	NaN	NaN	NaN	8.72	NaN	-0.13	NaN	NaN	NaN	NaN	NaN	NaN	NaN	NaN	NaN	NaN	NaN	NaN
3.755	38.489	0.96	NaN	NaN	NaN	NaN	NaN	NaN	NaN	NaN	NaN	8.77	NaN	0.36	NaN	NaN	NaN	NaN	NaN	NaN	NaN	NaN	NaN	NaN	NaN	NaN
3.78	38.639	0.73	NaN	NaN	NaN	NaN	NaN	NaN	NaN	NaN	NaN	8.82	NaN	0.39	NaN	NaN	NaN	NaN	NaN	NaN	NaN	NaN	NaN	NaN	NaN	NaN
3.805	39.179	NaN	NaN	NaN	NaN	NaN	NaN	NaN	NaN	NaN	NaN	8.87	NaN	0.29	NaN	NaN	NaN	NaN	NaN	NaN	NaN	NaN	NaN	NaN	NaN	NaN
3.83	39.61	0.7	NaN	NaN	NaN	NaN	NaN	NaN	NaN	NaN	NaN	8.97	NaN	0.08	NaN	NaN	NaN	NaN	NaN	NaN	NaN	NaN	NaN	NaN	NaN	NaN
3.855	40.189	NaN	NaN	NaN	NaN	NaN	NaN	NaN	NaN	NaN	NaN	9.02	NaN	-0.21	NaN	NaN	NaN	NaN	NaN	NaN	NaN	NaN	NaN	NaN	NaN	NaN
3.88	40.341	0.88	NaN	NaN	NaN	NaN	NaN	NaN	NaN	NaN	NaN	9.07	NaN	-0.08	NaN	NaN	NaN	NaN	NaN	NaN	NaN	NaN	NaN	NaN	NaN	NaN
3.905	40.538	NaN	NaN	NaN	NaN	NaN	NaN	NaN	NaN	NaN	NaN	9.17	NaN	-0.03	NaN	NaN	NaN	NaN	NaN	NaN	NaN	NaN	NaN	NaN	NaN	NaN
3.93	41.214	NaN	NaN	NaN	NaN	NaN	NaN	NaN	NaN	NaN	NaN	9.22	NaN	0.62	NaN	NaN	NaN	NaN	NaN	NaN	NaN	NaN	NaN	NaN	NaN	NaN
3.955	41.396	NaN	NaN	NaN	NaN	NaN	NaN	NaN	NaN	NaN	NaN	9.27	NaN	0.35	NaN	NaN	NaN	NaN	NaN	NaN	NaN	NaN	NaN	NaN	NaN	NaN
3.98	41.485	NaN	NaN	NaN	NaN	NaN	NaN	NaN	NaN	NaN	NaN	9.32	NaN	0.32	NaN	NaN	NaN	NaN	NaN	NaN	NaN	NaN	NaN	NaN	NaN	NaN
4.005	41.565	NaN	NaN	NaN	NaN	NaN	NaN	NaN	NaN	NaN	NaN	9.37	NaN	0.31	NaN	NaN	NaN	NaN	NaN	NaN	NaN	NaN	NaN	NaN	NaN	NaN
4.03	41.64	NaN	NaN	NaN	NaN	NaN	NaN	NaN	NaN	NaN	NaN	9.42	NaN	-0.05	NaN	NaN	NaN	NaN	NaN	NaN	NaN	NaN	NaN	NaN	NaN	NaN
4.055	41.731	NaN	NaN	NaN	NaN	NaN	NaN	NaN	NaN	NaN	NaN	9.57	NaN	0.1	NaN	NaN	NaN	NaN	NaN	NaN	NaN	NaN	NaN	NaN	NaN	NaN
4.08	42.006	NaN	NaN	NaN	NaN	NaN	NaN	NaN	NaN	NaN	NaN	9.62	NaN	0.24	NaN	NaN	NaN	NaN	NaN	NaN	NaN	NaN	NaN	NaN	NaN	NaN
4.105	42.596	NaN	NaN	NaN	NaN	NaN	NaN	NaN	NaN	NaN	NaN	9.67	NaN	0.01	NaN	NaN	NaN	NaN	NaN	NaN	NaN	NaN	NaN	NaN	NaN	NaN
4.13	42.872	NaN	NaN	NaN	NaN	NaN	NaN	NaN	NaN	NaN	NaN	9.72	NaN	-0.23	NaN	NaN	NaN	NaN	NaN	NaN	NaN	NaN	NaN	NaN	NaN	NaN
4.155	43.089	NaN	NaN	NaN	NaN	NaN	NaN	NaN	NaN	NaN	NaN	9.77	NaN	-0.13	NaN	NaN	NaN	NaN	NaN	NaN	NaN	NaN	NaN	NaN	NaN	NaN
4.18	43.368	NaN	NaN	NaN	NaN	NaN	NaN	NaN	NaN	NaN	NaN	9.82	NaN	-0.15	NaN	NaN	NaN	NaN	NaN	NaN	NaN	NaN	NaN	NaN	NaN	NaN
4.205	43.581	NaN	NaN	NaN	NaN	NaN	NaN	NaN	NaN	NaN	NaN	9.87	NaN	-0.1	NaN	NaN	NaN	NaN	NaN	NaN	NaN	NaN	NaN	NaN	NaN	NaN
4.23	43.638	NaN	NaN	NaN	NaN	NaN	NaN	NaN	NaN	NaN	NaN	10.02	NaN	0.11	NaN	NaN	NaN	NaN	NaN	NaN	NaN	NaN	NaN	NaN	NaN	NaN
4.255	43.697	NaN	NaN	NaN	NaN	NaN	NaN	NaN	NaN	NaN	NaN	10.12	NaN	0.43	NaN	NaN	NaN	NaN	NaN	NaN	NaN	NaN	NaN	NaN	NaN	NaN
4.28	43.797	NaN	NaN	NaN	NaN	NaN	NaN	NaN	NaN	NaN	NaN	10.17	NaN	0.25	NaN	NaN	NaN	NaN	NaN	NaN	NaN	NaN	NaN	NaN	NaN	NaN
4.305	43.914	1.04	NaN	NaN	NaN	NaN	NaN	NaN	NaN	NaN	NaN	10.22	NaN	0.28	NaN	NaN	NaN	NaN	NaN	NaN	NaN	NaN	NaN	NaN	NaN	NaN
4.33	44.259	NaN	NaN	NaN	NaN	NaN	NaN	NaN	NaN	NaN	NaN	10.27	NaN	0.15	NaN	NaN	NaN	NaN	NaN	NaN	NaN	NaN	NaN	NaN	NaN	NaN
4.355	44.343	NaN	NaN	NaN	NaN	NaN	NaN	NaN	NaN	NaN	NaN	10.32	NaN	0.26	NaN	NaN	NaN	NaN	NaN	NaN	NaN	NaN	NaN	NaN	NaN	NaN
4.38	44.408	NaN	NaN	NaN	NaN	NaN	NaN	NaN	NaN	NaN	NaN	10.37	NaN	0.22	NaN	NaN	NaN	NaN	NaN	NaN	NaN	NaN	NaN	NaN	NaN	NaN
4.405	44.761	NaN	NaN	NaN	NaN	NaN	NaN	NaN	NaN	NaN	NaN	10.42	NaN	0.06	NaN	NaN	NaN	NaN	NaN	NaN	NaN	NaN	NaN	NaN	NaN	NaN
4.43	45.216	NaN	NaN	NaN	NaN	NaN	NaN	NaN	NaN	NaN	NaN	10.47	NaN	0.46	NaN	NaN	NaN	NaN	NaN	NaN	NaN	NaN	NaN	NaN	NaN	NaN
4.455	45.674	NaN	NaN	NaN	NaN	NaN	NaN	NaN	NaN	NaN	NaN	10.52	NaN	0.46	NaN	NaN	NaN	NaN	NaN	NaN	NaN	NaN	NaN	NaN	NaN	NaN
4.48	45.94	NaN	NaN	NaN	NaN	NaN	NaN	NaN	NaN	NaN	NaN	10.57	NaN	0.43	NaN	NaN	NaN	NaN	NaN	NaN	NaN	NaN	NaN	NaN	NaN	NaN
4.505	46.017	NaN	NaN	NaN	NaN	NaN	NaN	NaN	NaN	NaN	NaN	10.62	NaN	0.16	NaN	NaN	NaN	NaN	NaN	NaN	NaN	NaN	NaN	NaN	NaN	NaN
4.53	46.431	NaN	NaN	NaN	NaN	NaN	NaN	NaN	NaN	NaN	NaN	10.67	NaN	0.47	NaN	NaN	NaN	NaN	NaN	NaN	NaN	NaN	NaN	NaN	NaN	NaN
4.555	46.606	NaN	NaN	NaN	NaN	NaN	NaN	NaN	NaN	NaN	NaN	10.72	NaN	0.01	NaN	NaN	NaN	NaN	NaN	NaN	NaN	NaN	NaN	NaN	NaN	NaN
4.58	46.739	NaN	NaN	NaN	NaN	NaN	NaN	NaN	NaN	NaN	NaN	10.77	NaN	-0.37	NaN	NaN	NaN	NaN	NaN	NaN	NaN	NaN	NaN	NaN	NaN	NaN
4.605	47.182	NaN	NaN	NaN	NaN	NaN	NaN	NaN	NaN	NaN	NaN	10.82	NaN	-0.25	NaN	NaN	NaN	NaN	NaN	NaN	NaN	NaN	NaN	NaN	NaN	NaN
4.63	47.484	NaN	NaN	NaN	NaN	NaN	NaN	NaN	NaN	NaN	NaN	10.87	NaN	-0.02	NaN	NaN	NaN	NaN	NaN	NaN	NaN	NaN	NaN	NaN	NaN	NaN
4.655	47.979	NaN	NaN	NaN	NaN	NaN	NaN	NaN	NaN	NaN	NaN	10.92	NaN	-0.15	NaN	NaN	NaN	NaN	NaN	NaN	NaN	NaN	NaN	NaN	NaN	NaN
4.68	48.373	NaN	NaN	NaN	NaN	NaN	NaN	NaN	NaN	NaN	NaN	10.97	NaN	-0.38	NaN	NaN	NaN	NaN	NaN	NaN	NaN	NaN	NaN	NaN	NaN	NaN
4.705	48.587	NaN	NaN	NaN	NaN	NaN	NaN	NaN	NaN	NaN	NaN	11.02	NaN	-0.33	NaN	NaN	NaN	NaN	NaN	NaN	NaN	NaN	NaN	NaN	NaN	NaN
4.73	NaN	NaN	NaN	NaN	NaN	NaN	NaN	NaN	NaN	NaN	NaN	11.07	NaN	-0.42	NaN	NaN	NaN	NaN	NaN	NaN	NaN	NaN	NaN	NaN	NaN	NaN
4.755	NaN	NaN	NaN	NaN	NaN	NaN	NaN	NaN	NaN	NaN	NaN	11.12	NaN	-0.17	NaN	NaN	NaN	NaN	NaN	NaN	NaN	NaN	NaN	NaN	NaN	NaN
4.78	NaN	0.84	NaN	NaN	NaN	NaN	NaN	NaN	NaN	NaN	NaN	11.17	NaN	0.02	NaN	NaN	NaN	NaN	NaN	NaN	NaN	NaN	NaN	NaN	NaN	NaN
4.805	NaN	NaN	NaN	NaN	NaN	NaN	NaN	NaN	NaN	NaN	NaN	11.22	NaN	0.16	NaN	NaN	NaN	NaN	NaN	NaN	NaN	NaN	NaN	NaN	NaN	NaN
4.83	NaN	0.93	NaN	NaN	NaN	NaN	NaN	NaN	NaN	NaN	NaN	11.27	NaN	-0.35	NaN	NaN	NaN	NaN	NaN	NaN	NaN	NaN	NaN	NaN	NaN	NaN
4.855	NaN	NaN	NaN	NaN	NaN	NaN	NaN	NaN	NaN	NaN	NaN	11.32	NaN	0.16	NaN	NaN	NaN	NaN	NaN	NaN	NaN	NaN	NaN	NaN	NaN	NaN
4.88	NaN	0.92	NaN	NaN	NaN	NaN	NaN	NaN	NaN	NaN	NaN	11.42	NaN	0.13	NaN	NaN	NaN	NaN	NaN	NaN	NaN	NaN	NaN	NaN	NaN	NaN
4.905	NaN	NaN	NaN	NaN	NaN	NaN	NaN	NaN	NaN	NaN	NaN	11.52	NaN	-0.1	NaN	NaN	NaN	NaN	NaN	NaN	NaN	NaN	NaN	NaN	NaN	NaN
4.93	NaN	0.79	NaN	NaN	NaN	NaN	NaN	NaN	NaN	NaN	NaN	11.57	NaN	-0.25	NaN	NaN	NaN	NaN	NaN	NaN	NaN	NaN	NaN	NaN	NaN	NaN
4.955	NaN	NaN	NaN	NaN	NaN	NaN	NaN	NaN	NaN	NaN	NaN	11.67	NaN	-0.36	NaN	NaN	NaN	NaN	NaN	NaN	NaN	NaN	NaN	NaN	NaN	NaN
4.98	NaN	NaN	NaN	NaN	NaN	NaN	NaN	NaN	NaN	NaN	NaN	11.72	NaN	0.07	NaN	NaN	NaN	NaN	NaN	NaN	NaN	NaN	NaN	NaN	NaN	NaN
5.005	NaN	NaN	NaN	NaN	NaN	NaN	NaN	NaN	NaN	NaN	NaN	11.77	NaN	0.56	NaN	NaN	NaN	NaN	NaN	NaN	NaN	NaN	NaN	NaN	NaN	NaN
5.03	NaN	NaN	NaN	NaN	NaN	NaN	NaN	NaN	NaN	NaN	NaN	11.82	NaN	0.48	NaN	NaN	NaN	NaN	NaN	NaN	NaN	NaN	NaN	NaN	NaN	NaN
NaN	NaN	NaN	NaN	NaN	NaN	NaN	NaN	NaN	NaN	NaN	NaN	11.87	NaN	0.1	NaN	NaN	NaN	NaN	NaN	NaN	NaN	NaN	NaN	NaN	NaN	NaN
NaN	NaN	NaN	NaN	NaN	NaN	NaN	NaN	NaN	NaN	NaN	NaN	11.92	NaN	0.58	NaN	NaN	NaN	NaN	NaN	NaN	NaN	NaN	NaN	NaN	NaN	NaN
NaN	NaN	NaN	NaN	NaN	NaN	NaN	NaN	NaN	NaN	NaN	NaN	11.97	NaN	0.04	NaN	NaN	NaN	NaN	NaN	NaN	NaN	NaN	NaN	NaN	NaN	NaN
NaN	NaN	NaN	NaN	NaN	NaN	NaN	NaN	NaN	NaN	NaN	NaN	12.02	NaN	0.4	NaN	NaN	NaN	NaN	NaN	NaN	NaN	NaN	NaN	NaN	NaN	NaN
NaN	NaN	NaN	NaN	NaN	NaN	NaN	NaN	NaN	NaN	NaN	NaN	12.07	NaN	0.41	NaN	NaN	NaN	NaN	NaN	NaN	NaN	NaN	NaN	NaN	NaN	NaN
NaN	NaN	NaN	NaN	NaN	NaN	NaN	NaN	NaN	NaN	NaN	NaN	12.17	NaN	0.35	NaN	NaN	NaN	NaN	NaN	NaN	NaN	NaN	NaN	NaN	NaN	NaN
NaN	NaN	NaN	NaN	NaN	NaN	NaN	NaN	NaN	NaN	NaN	NaN	12.22	NaN	0.33	NaN	NaN	NaN	NaN	NaN	NaN	NaN	NaN	NaN	NaN	NaN	NaN
NaN	NaN	NaN	NaN	NaN	NaN	NaN	NaN	NaN	NaN	NaN	NaN	12.32	NaN	0.21	NaN	NaN	NaN	NaN	NaN	NaN	NaN	NaN	NaN	NaN	NaN	NaN
NaN	NaN	NaN	NaN	NaN	NaN	NaN	NaN	NaN	NaN	NaN	NaN	12.37	NaN	0.56	NaN	NaN	NaN	NaN	NaN	NaN	NaN	NaN	NaN	NaN	NaN	NaN
NaN	NaN	NaN	NaN	NaN	NaN	NaN	NaN	NaN	NaN	NaN	NaN	12.42	NaN	0.7	NaN	NaN	NaN	NaN	NaN	NaN	NaN	NaN	NaN	NaN	NaN	NaN
NaN	NaN	NaN	NaN	NaN	NaN	NaN	NaN	NaN	NaN	NaN	NaN	12.52	NaN	0.5	NaN	NaN	NaN	NaN	NaN	NaN	NaN	NaN	NaN	NaN	NaN	NaN
NaN	NaN	NaN	NaN	NaN	NaN	NaN	NaN	NaN	NaN	NaN	NaN	12.57	NaN	0.48	NaN	NaN	NaN	NaN	NaN	NaN	NaN	NaN	NaN	NaN	NaN	NaN
NaN	NaN	NaN	NaN	NaN	NaN	NaN	NaN	NaN	NaN	NaN	NaN	12.67	NaN	0.3	NaN	NaN	NaN	NaN	NaN	NaN	NaN	NaN	NaN	NaN	NaN	NaN
NaN	NaN	NaN	NaN	NaN	NaN	NaN	NaN	NaN	NaN	NaN	NaN	12.77	NaN	0.24	NaN	NaN	NaN	NaN	NaN	NaN	NaN	NaN	NaN	NaN	NaN	NaN
NaN	NaN	NaN	NaN	NaN	NaN	NaN	NaN	NaN	NaN	NaN	NaN	12.82	NaN	0.11	NaN	NaN	NaN	NaN	NaN	NaN	NaN	NaN	NaN	NaN	NaN	NaN
NaN	NaN	NaN	NaN	NaN	NaN	NaN	NaN	NaN	NaN	NaN	NaN	12.87	NaN	0.71	NaN	NaN	NaN	NaN	NaN	NaN	NaN	NaN	NaN	NaN	NaN	NaN
NaN	NaN	NaN	NaN	NaN	NaN	NaN	NaN	NaN	NaN	NaN	NaN	12.92	NaN	0.68	NaN	NaN	NaN	NaN	NaN	NaN	NaN	NaN	NaN	NaN	NaN	NaN
NaN	NaN	NaN	NaN	NaN	NaN	NaN	NaN	NaN	NaN	NaN	NaN	13.02	NaN	0.72	NaN	NaN	NaN	NaN	NaN	NaN	NaN	NaN	NaN	NaN	NaN	NaN
NaN	NaN	NaN	NaN	NaN	NaN	NaN	NaN	NaN	NaN	NaN	NaN	13.07	NaN	0.4	NaN	NaN	NaN	NaN	NaN	NaN	NaN	NaN	NaN	NaN	NaN	NaN
NaN	NaN	NaN	NaN	NaN	NaN	NaN	NaN	NaN	NaN	NaN	NaN	13.12	NaN	0.46	NaN	NaN	NaN	NaN	NaN	NaN	NaN	NaN	NaN	NaN	NaN	NaN
NaN	NaN	NaN	NaN	NaN	NaN	NaN	NaN	NaN	NaN	NaN	NaN	13.17	NaN	0.67	NaN	NaN	NaN	NaN	NaN	NaN	NaN	NaN	NaN	NaN	NaN	NaN
NaN	NaN	NaN	NaN	NaN	NaN	NaN	NaN	NaN	NaN	NaN	NaN	13.23	NaN	-0.14	NaN	NaN	NaN	NaN	NaN	NaN	NaN	NaN	NaN	NaN	NaN	NaN
NaN	NaN	NaN	NaN	NaN	NaN	NaN	NaN	NaN	NaN	NaN	NaN	13.27	NaN	0.22	NaN	NaN	NaN	NaN	NaN	NaN	NaN	NaN	NaN	NaN	NaN	NaN
NaN	NaN	NaN	NaN	NaN	NaN	NaN	NaN	NaN	NaN	NaN	NaN	13.32	NaN	0.4	NaN	NaN	NaN	NaN	NaN	NaN	NaN	NaN	NaN	NaN	NaN	NaN
NaN	NaN	NaN	NaN	NaN	NaN	NaN	NaN	NaN	NaN	NaN	NaN	13.37	NaN	0.08	NaN	NaN	NaN	NaN	NaN	NaN	NaN	NaN	NaN	NaN	NaN	NaN
NaN	NaN	NaN	NaN	NaN	NaN	NaN	NaN	NaN	NaN	NaN	NaN	13.42	NaN	0.32	NaN	NaN	NaN	NaN	NaN	NaN	NaN	NaN	NaN	NaN	NaN	NaN
NaN	NaN	NaN	NaN	NaN	NaN	NaN	NaN	NaN	NaN	NaN	NaN	13.47	NaN	0.04	NaN	NaN	NaN	NaN	NaN	NaN	NaN	NaN	NaN	NaN	NaN	NaN
NaN	NaN	NaN	NaN	NaN	NaN	NaN	NaN	NaN	NaN	NaN	NaN	13.57	NaN	-0.12	NaN	NaN	NaN	NaN	NaN	NaN	NaN	NaN	NaN	NaN	NaN	NaN
NaN	NaN	NaN	NaN	NaN	NaN	NaN	NaN	NaN	NaN	NaN	NaN	13.62	NaN	-0.18	NaN	NaN	NaN	NaN	NaN	NaN	NaN	NaN	NaN	NaN	NaN	NaN
NaN	NaN	NaN	NaN	NaN	NaN	NaN	NaN	NaN	NaN	NaN	NaN	13.67	NaN	0.24	NaN	NaN	NaN	NaN	NaN	NaN	NaN	NaN	NaN	NaN	NaN	NaN
NaN	NaN	NaN	NaN	NaN	NaN	NaN	NaN	NaN	NaN	NaN	NaN	13.72	NaN	0.55	NaN	NaN	NaN	NaN	NaN	NaN	NaN	NaN	NaN	NaN	NaN	NaN
NaN	NaN	NaN	NaN	NaN	NaN	NaN	NaN	NaN	NaN	NaN	NaN	13.77	NaN	0.41	NaN	NaN	NaN	NaN	NaN	NaN	NaN	NaN	NaN	NaN	NaN	NaN
NaN	NaN	NaN	NaN	NaN	NaN	NaN	NaN	NaN	NaN	NaN	NaN	13.82	NaN	0.69	NaN	NaN	NaN	NaN	NaN	NaN	NaN	NaN	NaN	NaN	NaN	NaN
NaN	NaN	NaN	NaN	NaN	NaN	NaN	NaN	NaN	NaN	NaN	NaN	13.92	NaN	0.59	NaN	NaN	NaN	NaN	NaN	NaN	NaN	NaN	NaN	NaN	NaN	NaN
NaN	NaN	NaN	NaN	NaN	NaN	NaN	NaN	NaN	NaN	NaN	NaN	14.02	NaN	0.8	NaN	NaN	NaN	NaN	NaN	NaN	NaN	NaN	NaN	NaN	NaN	NaN
NaN	NaN	NaN	NaN	NaN	NaN	NaN	NaN	NaN	NaN	NaN	NaN	14.07	NaN	0.62	NaN	NaN	NaN	NaN	NaN	NaN	NaN	NaN	NaN	NaN	NaN	NaN
NaN	NaN	NaN	NaN	NaN	NaN	NaN	NaN	NaN	NaN	NaN	NaN	14.12	NaN	0.01	NaN	NaN	NaN	NaN	NaN	NaN	NaN	NaN	NaN	NaN	NaN	NaN
NaN	NaN	NaN	NaN	NaN	NaN	NaN	NaN	NaN	NaN	NaN	NaN	14.17	NaN	0.56	NaN	NaN	NaN	NaN	NaN	NaN	NaN	NaN	NaN	NaN	NaN	NaN
NaN	NaN	NaN	NaN	NaN	NaN	NaN	NaN	NaN	NaN	NaN	NaN	14.22	NaN	0.71	NaN	NaN	NaN	NaN	NaN	NaN	NaN	NaN	NaN	NaN	NaN	NaN
NaN	NaN	NaN	NaN	NaN	NaN	NaN	NaN	NaN	NaN	NaN	NaN	14.27	NaN	0.26	NaN	NaN	NaN	NaN	NaN	NaN	NaN	NaN	NaN	NaN	NaN	NaN
NaN	NaN	NaN	NaN	NaN	NaN	NaN	NaN	NaN	NaN	NaN	NaN	14.32	NaN	0.45	NaN	NaN	NaN	NaN	NaN	NaN	NaN	NaN	NaN	NaN	NaN	NaN
NaN	NaN	NaN	NaN	NaN	NaN	NaN	NaN	NaN	NaN	NaN	NaN	14.35	NaN	0.27	NaN	NaN	NaN	NaN	NaN	NaN	NaN	NaN	NaN	NaN	NaN	NaN
NaN	NaN	NaN	NaN	NaN	NaN	NaN	NaN	NaN	NaN	NaN	NaN	14.41	NaN	0.61	NaN	NaN	NaN	NaN	NaN	NaN	NaN	NaN	NaN	NaN	NaN	NaN
