# Supplementary material for: Deglacial carbon cycle changes observed in a compilation of 117 benthic δ 13 C time series (20–6 ka)
Source: Copernicus journal article supplement (doi:10.5194/cp-2018-25), 2018-03-15
Supplement: Supplementary file 14 [file ISA_xyz.xls]

## Sheet: ISA_xyz
	Latitude	Longitude	Depth (m)
V29-135	-27.51	-46.47	1268
CHN115-70	-27.7	-46.52	1567
MD96-2080	-26.7	-43.33	2438
ODP1088	-26.95	-44.67	2069
V30-40	11.48	-79.38	1800
GeoB3104	52.16	-12.75	900
BT4	34.96	-7.12	803
KNR159-36	29.27	-11.5	796
RC16-119	21.25	-17.8	812
