# Supplementary material for: Deglacial carbon cycle changes observed in a compilation of 117 benthic δ 13 C time series (20–6 ka)
Source: Copernicus journal article supplement (doi:10.5194/cp-2018-25), 2018-03-15
Supplement: Supplementary file 15 [file LDNA_sites.xls]

## Sheet: LDNA_sites
EW9209-1JPC			EN066-26			EN066-32			EN066-36			GeoB1101			GIK16402			KNR110-55			KNR110-58			ODP928			GIK13521
0.01	2.3961	0.53	0.03	0.92552	0.6	0.06	1.1911	0.87	0.03	NaN	0.78	0.1	0.01851	0.49	0.2	3.9789	1.04	0.02	1.2097	1.15	0.05	4.1171	1.17	0.025	0.091094	0.96	0.14	NaN	0.9442
0.03	3.8794	0.77	0.08	1.226	0.69	0.11	1.4846	0.96	0.05	NaN	0.71	0.125	0.58552	1.17	0.3	4.3556	1	0.05	1.5979	0.97	0.1	4.9363	1.11	0.145	1.39	1.18	0.16	NaN	1.0276
0.07	5.444	0.38	0.13	1.5362	0.53	0.13	1.6083	0.55	0.1	NaN	0.07	0.175	1.3319	0.67	0.725	5.8209	1.16	0.1	2.3911	1.07	0.15	5.742	0.79	0.265	2.3292	1.02	0.24	1.6603	0.9997
0.1	6.491	0.81	0.18	1.9075	0.77	0.21	2.1552	0.93	0.2	0.94234	0.54	0.2	1.6453	0.93	0.775	5.997	0.91	0.125	2.805	1.21	0.22	7.078	1.07	0.385	3.429	1.13	0.32	3.2471	0.9634
0.13	7.5527	0.94	0.23	2.2938	0.84	0.23	2.303	0.8	0.25	1.3641	0.68	0.3	2.9647	0.66	0.875	6.4104	0.94	0.15	3.2232	0.94	0.26	8.0834	1.12	0.505	4.7707	0.86	0.36	4.0249	0.9336
0.17	9.0336	0.13	0.28	2.6431	0.77	0.26	2.5407	0.71	0.3	1.8323	0.67	0.4	4.8456	0.45	0.925	6.6335	0.7	0.175	3.6367	1.22	0.3	9.0022	1.04	0.625	5.7868	0.99	0.42	4.6218	1.0077
0.2	10.779	0.94	0.33	2.9724	1.01	0.28	2.7083	0.95	0.35	2.2984	0.85	0.5	6.4285	1.06	0.975	6.8708	0.64	0.2	4.0323	0.94	0.35	9.7529	1.05	0.745	6.7222	0.82	0.48	4.9315	1.0765
0.23	12.895	0.39	0.38	3.3051	0.85	0.31	2.9603	0.24	0.4	2.7841	0.8	0.525	6.6592	1.04	1.075	7.3742	0.65	0.25	4.7633	1.23	0.4	10.339	0.94	0.865	7.8045	0.88	0.56	5.2991	0.9455
0.27	14.368	0.14	0.43	3.6319	0.89	0.33	3.1301	0.89	0.45	3.2806	0.98	0.55	6.8204	1.01	1.125	7.5711	1.03	0.275	5.1215	1.13	0.5	11.352	1.07	0.985	9.0478	1.01	0.64	5.7383	1.0193
0.3	14.935	-0.02	0.48	3.9538	0.9	0.36	3.3857	1.1	0.5	3.8101	0.74	0.575	6.9849	0.9	1.175	7.768	0.76	0.3	5.4808	1.13	0.65	12.383	0.65	1.105	10.207	0.8	0.64	5.7383	1.0603
0.33	15.518	0.21	0.53	4.2229	0.99	0.38	3.5726	0.94	0.55	4.3053	0.65	0.6	7.1494	1.2	1.275	8.1563	1.04	0.35	6.2402	1.16	0.73	12.814	1.1	1.225	11.003	0.74	0.72	6.3201	0.8883
0.37	17.739	0.09	0.58	4.4931	0.58	0.46	4.27	1.11	0.6	4.7997	0.59	0.625	7.314	1.07	1.35	8.4511	1.11	0.375	6.693	1.17	0.82	13.263	1.09	1.345	11.793	0.72	0.79	7.0598	0.7065
0.4	18.544	-0.19	0.63	4.7702	0.88	0.48	4.4347	0.76	0.65	5.2746	0.42	0.675	7.579	0.87	1.4	8.8783	0.74	0.4	7.2001	0.9	1	14.41	0.91	1.465	12.594	0.57	0.8	7.1858	0.7754
0.43	19.093	0.17	0.68	5.0376	1	0.51	4.6892	0.99	0.7	5.7622	0.58	0.8	8.2102	0.99	1.425	9.4515	0.7	0.425	7.6656	1.03	1.3	16.674	0.53	1.585	13.396	0.82	0.84	7.6681	0.924
0.47	19.713	0.05	0.73	5.3181	1.06	0.53	4.8589	0.92	0.75	6.2623	0.58	0.925	8.8096	1.13	1.475	10.719	0.55	0.45	8.1105	1.05	1.5	17.784	1.16	1.705	13.92	0.79	0.84	7.6681	0.8915
0.5	20.129	0.14	0.78	5.6082	0.95	0.56	5.1001	0.86	0.8	6.8398	0.36	0.99	9.0993	0.99	1.5	11.332	0.78	0.475	8.5424	1.08	1.7	18.9	0.92	1.825	14.286	0.56	0.94	9.0882	0.7181
0.53	20.436	0.62	0.83	5.9582	0.93	0.58	5.2608	0.98	0.85	7.4569	0.25	1.2	10.839	0.81	1.525	11.94	0.61	0.5	8.9468	1.03	2.6	25.523	0.46	1.885	14.463	0.46	1	10.241	0.6167
0.57	20.897	0.22	0.88	6.4807	0.78	0.61	5.509	1.02	0.9	8.0065	0.64	1.225	11.601	1.09	1.55	12.402	0.55	0.525	9.3015	1.13	2.9	27.308	1.14	1.915	14.538	0.56	1.02	10.612	0.6015
0.6	21.409	0.22	0.93	7.0817	0.9	0.63	5.6754	0.98	0.95	8.7457	0.11	1.25	12.663	0.69	1.575	12.821	0.64	0.55	9.5377	1	3.2	29.552	0.16	1.95	14.614	0.67	1.04	10.993	0.7136
0.63	22.02	-0.1	0.98	7.639	0.91	0.66	5.9274	0.86	1	9.6346	0.14	1.275	13.579	0.46	1.6	13.171	0.57	0.6	9.9456	0.91	3.7	31.859	1.73	1.975	14.663	0.15	1.06	11.24	0.4663
0.67	23.111	0.11	1.03	8.1292	0.79	0.68	6.1121	0.82	1.05	10.489	0.47	1.3	14.18	0.42	1.625	13.403	0.72	0.625	10.135	0.91	3.9	32.639	1.57	2.005	14.723	0.73	1.1	11.432	0.5263
0.7	24.031	0.23	1.08	8.5805	0.67	0.71	6.4179	0.93	1.1	11.318	0.39	1.325	14.744	0.9	1.65	13.617	0.55	0.65	10.324	0.93	4.01	33.315	1.34	2.035	14.782	0.2	1.12	11.507	0.4988
0.73	25.055	0	1.13	8.9975	0.59	0.73	6.6326	0.78	1.15	12.174	0.5	1.35	15.27	0.5	1.675	13.816	0.85	0.675	10.514	0.89	4.2	34.338	1.34	2.065	14.841	0.63	1.13	11.544	0.4449
0.77	26.105	0.17	1.18	9.3403	0.8	0.76	6.9824	0.7	1.2	12.903	0.25	1.375	15.796	0.54	1.7	13.991	0.69	0.725	10.855	0.94	4.3	35.011	1.3	2.095	14.898	0.65	1.14	11.582	0.3353
0.8	26.86	-0.12	1.23	9.6453	0.59	0.78	7.2342	0.84	1.25	13.532	0.19	1.4	16.081	0.49	1.725	14.167	0.53	0.75	11.013	0.74	4.4	36.17	1.33	2.155	15.014	0.45	1.16	11.67	0.4093
0.83	27.417	0.32	1.28	9.9046	0.77	0.81	7.643	0.75	1.3	14.029	0.31	1.425	16.341	0.36	1.75	14.343	0.58	0.775	11.13	0.87	4.5	37.583	1.28	2.185	15.072	0.63	1.22	11.987	0.6406
0.86	27.828	-0.18	1.33	10.157	0.69	0.83	7.9255	0.78	1.35	14.485	0.2	1.45	16.587	0.42	1.775	14.541	0.9	0.8	11.245	0.81	4.7	39.971	1.42	2.215	15.129	0.03	1.26	12.378	0.3275
0.9	28.327	0.11	1.38	10.406	0.42	0.86	8.3427	0.74	1.4	14.873	-0.07	1.475	16.858	1.1	1.8	14.752	1.01	0.825	11.348	0.69	5.1	43.798	1.05	2.245	15.187	-0.07	1.32	13.262	0.7491
0.93	28.839	0.14	1.43	10.659	0.66	0.88	8.6114	0.64	1.45	15.164	0.07	1.5	17.2	0.27	1.825	14.969	1.01	0.85	11.45	0.82	5.2	44.949	0.75	2.275	15.245	0.01	1.34	13.538	0.447
0.97	29.541	-0.18	1.48	10.906	0.63	0.91	8.9929	0.78	1.5	15.449	0.05	1.525	17.819	0.57	1.85	15.226	0.57	0.875	11.608	0.88	5.4	NaN	0.63	2.335	15.361	-0.04	1.36	13.788	0.6125
1	30.081	0.02	1.53	11.151	0.36	0.93	9.1934	0.75	1.55	15.725	0.05	1.55	18.538	0.45	1.875	15.525	0.58	0.9	11.831	1.01	NaN	NaN	NaN	2.365	15.425	0.06	1.38	13.931	0.7214
1.03	30.649	0.22	1.58	11.411	0.65	0.96	9.5019	0.74	1.6	15.949	-0.2	1.6	19.98	0.47	1.9	15.909	0.47	0.95	12.625	0.76	NaN	NaN	NaN	2.395	15.501	0.02	1.46	14.418	0.6905
1.07	31.468	0.31	1.63	11.66	0.48	0.98	9.681	0.78	1.65	16.121	-0.04	1.65	21.675	0.43	1.925	16.25	0.71	0.975	12.992	0.56	NaN	NaN	NaN	2.455	15.654	0.15	1.48	14.54	0.8385
1.1	32.117	0.39	1.68	11.897	0.6	1.01	9.9289	0.76	1.7	16.293	-0.22	1.7	23.415	0.09	1.95	16.582	0.59	0.99	13.215	0.85	NaN	NaN	NaN	2.485	15.73	0.16	1.5	14.663	0.851
1.13	32.827	0.39	1.73	12.135	0.39	1.06	10.328	0.72	1.75	16.454	-0.01	1.725	24.123	0.41	1.975	17.065	0.66	1.025	13.635	0.43	NaN	NaN	NaN	2.565	15.933	-0.18	1.56	15.026	0.483
1.17	33.939	0.25	1.78	12.417	0.89	1.08	10.489	0.31	1.8	16.614	-0.37	1.775	25.506	0.41	2	17.799	0.82	1.05	13.899	0.85	NaN	NaN	NaN	2.575	15.956	-0.1	1.62	15.388	0.1633
1.2	34.349	0.44	1.83	12.707	0.47	1.11	10.707	0.65	1.85	16.792	-0.18	1.8	26.088	0.69	2.025	18.434	0.77	1.075	14.139	0.68	NaN	NaN	NaN	2.585	15.979	-0.01	1.66	15.62	0.3591
1.23	34.8	0.51	1.88	13.014	0.51	1.13	10.845	0.34	1.9	16.976	-0.07	1.825	26.695	0.62	2.05	18.881	0.75	1.1	14.363	0.54	NaN	NaN	NaN	2.625	16.07	-0.05	1.68	15.721	-0.0619
1.27	35.564	0.49	1.93	13.317	0.87	1.16	11.045	0.49	1.95	17.13	-0.03	1.85	27.386	0.61	2.075	19.288	0.91	1.125	14.573	0.73	NaN	NaN	NaN	2.655	16.148	-0.02	1.84	16.206	0.0811
1.3	36.228	0.67	1.98	13.596	0.5	1.18	11.172	0.31	2	17.289	-0.35	1.925	28.953	1.11	2.1	19.765	0.7	1.15	14.774	0.63	NaN	NaN	NaN	2.675	16.205	-0.16	1.94	16.523	0.0167
1.33	37.115	0.83	2.03	13.872	0.6	1.21	11.324	0.21	2.05	17.448	0	1.975	29.58	0.53	2.125	20.258	0.81	1.2	15.17	0.33	NaN	NaN	NaN	2.775	16.556	0.07	2.08	17.068	-0.2006
1.37	38.246	0.34	2.08	14.136	0.26	1.23	11.412	0.6	2.1	17.616	0.02	1.99	29.727	0.92	2.15	21.085	0.84	1.225	15.39	0.76	NaN	NaN	NaN	2.885	17.327	-0.05	2.26	18.027	0.1204
1.4	38.929	0.13	2.13	14.405	0.29	1.26	11.543	0.22	2.15	17.913	-0.07	2.1	30.321	1.29	2.175	21.921	0.77	1.25	15.649	0.31	NaN	NaN	NaN	2.965	18.245	0.44	2.3	18.251	0.2781
1.43	39.477	0.38	2.18	14.682	0.46	1.28	11.626	0.04	2.2	18.43	-0.01	2.2	30.789	0.6	2.225	23.259	0.66	1.275	15.91	0.67	NaN	NaN	NaN	3.055	18.942	0.59	2.34	18.451	0.3091
1.47	40.199	0.36	2.23	14.955	0.37	1.31	11.746	0.42	2.25	19.031	-0.11	2.725	33.486	0.78	2.275	23.999	1.18	1.3	16.116	-0.49	NaN	NaN	NaN	3.085	19.134	0.59	2.4	18.752	0.1993
1.5	40.737	0.24	2.28	15.226	0.02	1.33	11.827	0.37	2.3	19.872	-0.03	2.75	33.644	1.19	2.325	24.606	0.72	1.325	16.367	0.58	NaN	NaN	NaN	3.115	19.32	0.66	2.44	18.945	0.2463
1.53	41.225	0.11	2.33	15.543	0.37	1.36	11.948	0.29	2.35	20.634	0.02	2.775	33.765	0.84	2.375	24.939	0.87	1.35	16.7	0.61	NaN	NaN	NaN	3.175	19.583	0.53	2.5	19.232	0.3016
1.57	41.761	0.52	2.38	16.076	0.39	1.38	12.029	0.2	2.4	21.32	-0.03	2.8	33.887	0.78	2.4	25.078	0.94	1.375	17.421	0.61	NaN	NaN	NaN	3.205	19.706	0.63	2.5	19.232	0.313
1.6	42.233	0.31	2.43	16.579	0.43	1.41	12.14	0.16	2.45	21.897	0.02	2.825	34.005	0.97	2.425	25.217	0.87	1.39	17.826	0.67	NaN	NaN	NaN	3.235	19.829	0.6	2.54	19.431	0.2003
1.63	42.746	0.54	2.48	17.149	0.28	1.43	12.218	0.36	2.5	22.42	-0.08	2.875	34.232	1.06	2.475	25.428	0.64	1.425	18.537	0.67	NaN	NaN	NaN	3.295	20.057	0.47	2.62	19.839	0.1977
1.67	43.434	0.65	2.53	17.903	0.65	1.46	12.338	0.73	2.55	22.944	0.02	2.9	34.345	0.83	2.5	25.521	0.9	1.45	18.961	0.63	NaN	NaN	NaN	3.355	20.271	0.52	2.7	20.241	0.3495
1.7	43.823	0.66	2.58	18.58	0.44	1.48	12.418	0.51	2.6	23.399	-0.32	2.925	34.457	0.81	2.525	25.614	1.02	1.5	19.659	0.47	NaN	NaN	NaN	3.865	21.839	0.42	2.78	20.704	0.2384
1.73	44.134	0.67	2.63	19.131	0.52	1.51	12.518	0.31	2.65	23.863	-0.15	2.95	34.588	0.98	2.55	25.702	1.36	1.525	19.936	0.17	NaN	NaN	NaN	3.985	22.11	0.64	2.78	20.704	0.3827
1.77	44.582	0.96	2.68	19.676	0.43	1.53	12.584	0.12	2.7	24.371	-0.45	2.975	34.8	0.94	2.575	25.791	1.2	1.575	20.509	0.51	NaN	NaN	NaN	5.185	24.829	0.3	2.82	20.951	0.2487
1.8	44.918	0.5	2.73	20.21	0.5	1.56	12.681	0.62	2.75	24.87	0.13	2.99	34.948	0.76	2.6	25.88	1.03	1.6	20.847	0.51	NaN	NaN	NaN	5.305	25.253	0.2	2.9	21.44	-0.1902
1.83	45.279	0.12	2.78	20.745	0.45	1.58	12.736	0.23	2.8	25.263	-0.03	3.025	35.384	0.99	2.625	25.968	1.37	1.625	21.182	0.37	NaN	NaN	NaN	5.545	26.469	0.31	2.96	21.796	0.1885
1.87	45.745	0.45	2.83	21.264	0.52	1.61	12.821	0.55	2.85	25.654	-0.24	3.05	35.902	1.12	2.675	26.151	1.18	1.65	21.515	0.55	NaN	NaN	NaN	5.905	27.819	0.37	2.98	21.909	0.1802
1.9	46.157	0.56	2.88	21.773	0.6	1.63	12.877	0.53	2.9	26.03	-0.17	3.075	36.503	1.07	2.7	26.244	1.14	1.7	22.143	0.71	NaN	NaN	NaN	6.385	28.912	0.46	3.12	22.789	-0.0578
1.93	NaN	0.9	2.93	22.249	0.31	1.66	12.962	0.4	2.95	26.348	-0.09	3.1	37.508	0.68	2.725	26.336	1.15	1.75	22.865	0.63	NaN	NaN	NaN	6.505	29.112	0.47	3.18	23.158	-0.0798
1.97	NaN	0.86	2.98	22.935	0.5	1.68	13.018	0.51	3	26.606	-0.16	3.125	38.72	1.04	2.75	26.429	1.32	1.975	25.451	0.36	NaN	NaN	NaN	6.745	29.503	0.28	3.2	23.263	-0.1017
2	NaN	0.89	3.03	23.507	0.55	1.71	13.103	0.66	3.05	26.86	-0.16	3.15	39.65	0.99	2.775	26.54	1.22	2.075	26.335	0.83	NaN	NaN	NaN	7.345	30.38	0.54	3.22	23.367	0.2267
2.03	NaN	0.96	3.08	24.012	0.43	1.73	13.159	0.41	3.1	27.144	-0.14	3.175	40.438	0.97	2.8	26.684	0.9	2.1	26.667	0.7	NaN	NaN	NaN	7.585	31.04	0.55	3.28	23.669	0.1857
2.07	NaN	0.91	3.13	24.623	0.47	1.76	13.254	0.17	3.15	27.41	-0.37	3.2	41.159	1.09	2.825	26.836	0.9	2.125	27.058	0.68	NaN	NaN	NaN	7.705	32.234	0.4	3.32	23.871	0.1677
2.1	NaN	0.75	3.18	25.168	0.42	1.78	13.32	0.41	3.2	27.702	0.04	3.225	41.806	0.86	2.875	27.252	1.14	2.225	28.528	0.38	NaN	NaN	NaN	7.825	33.705	0.83	NaN	NaN	NaN
2.13	NaN	0.91	3.23	25.743	0.58	1.81	13.458	0.42	3.25	28.004	-0.34	3.25	42.715	1.18	2.9	27.488	1.2	2.375	29.896	0.78	NaN	NaN	NaN	7.945	34.326	0.44	NaN	NaN	NaN
2.2	NaN	0.04	3.28	26.371	0.65	1.83	13.554	0.48	3.3	28.301	-0.22	3.275	43.665	1.2	2.925	27.814	1.13	2.425	30.278	0.96	NaN	NaN	NaN	8.065	34.778	0.63	NaN	NaN	NaN
2.23	NaN	0.49	3.33	27.131	0.55	1.86	13.698	0.43	3.35	28.594	-0.15	3.3	44.259	0.89	2.95	28.228	0.98	2.475	30.661	0.84	NaN	NaN	NaN	8.185	35.277	0.04	NaN	NaN	NaN
2.27	NaN	0.54	3.38	27.995	0.61	1.88	13.826	0.47	3.4	28.866	-0.16	3.325	44.881	1.16	2.975	28.634	1.23	2.525	30.987	1.09	NaN	NaN	NaN	8.305	35.761	0.61	NaN	NaN	NaN
2.3	NaN	0.16	3.43	28.794	0.6	1.91	14.054	0.08	3.45	29.127	-0.47	3.35	45.284	1	2.99	28.862	0.95	2.55	31.159	0.88	NaN	NaN	NaN	8.345	35.907	0.63	NaN	NaN	NaN
2.33	NaN	0.48	3.48	29.408	0.37	1.93	14.206	-0.06	3.5	29.406	-0.21	3.375	45.626	0.78	3	29.011	0.58	2.575	31.349	0.91	NaN	NaN	NaN	8.385	36.041	0.67	NaN	NaN	NaN
2.37	NaN	-0.05	3.53	29.928	0.07	1.96	14.439	0.13	NaN	NaN	NaN	3.425	NaN	0.99	3.025	29.379	0.61	2.6	31.546	1.03	NaN	NaN	NaN	8.425	36.174	0.52	NaN	NaN	NaN
2.4	NaN	0.03	3.58	30.38	0.09	1.98	14.598	-0.08	NaN	NaN	NaN	3.45	NaN	0.85	3.05	29.738	0.56	2.625	31.828	1.02	NaN	NaN	NaN	8.445	36.241	0.49	NaN	NaN	NaN
2.43	NaN	-0.07	3.63	30.802	0.45	2.01	14.837	0.16	NaN	NaN	NaN	3.5	NaN	0.8	3.075	30.056	0.57	2.65	32.107	0.99	NaN	NaN	NaN	8.475	36.34	0.52	NaN	NaN	NaN
2.47	NaN	-0.5	3.68	31.125	0.66	2.06	15.179	-0.07	NaN	NaN	NaN	3.52	NaN	1.05	3.1	30.37	0.56	2.675	32.413	0.62	NaN	NaN	NaN	8.485	36.382	0.68	NaN	NaN	NaN
2.5	NaN	-0.03	3.73	31.457	0.48	2.08	15.29	-0.43	NaN	NaN	NaN	3.55	NaN	1.05	3.125	30.683	0.7	2.7	32.736	0.94	NaN	NaN	NaN	8.505	36.483	0.74	NaN	NaN	NaN
2.52	NaN	0.15	3.78	31.704	0.57	2.11	15.444	-0.09	NaN	NaN	NaN	3.575	NaN	0.61	3.15	30.933	0.6	2.725	33.048	0.75	NaN	NaN	NaN	8.515	36.54	0.35	NaN	NaN	NaN
2.54	NaN	-0.12	3.83	31.934	0.57	2.16	15.706	0.1	NaN	NaN	NaN	3.6	NaN	0.76	3.175	31.13	0.59	2.775	33.703	0.89	NaN	NaN	NaN	8.575	36.985	0.33	NaN	NaN	NaN
2.56	NaN	-0.38	3.88	32.18	0.55	2.18	15.811	-0.32	NaN	NaN	NaN	3.7	NaN	0.2	3.2	31.292	1.14	2.8	33.894	1.06	NaN	NaN	NaN	8.595	37.139	0.18	NaN	NaN	NaN
2.58	NaN	-0.1	3.93	32.652	0.44	2.21	15.947	-0.31	NaN	NaN	NaN	3.725	NaN	0.92	3.225	31.435	1.23	2.875	34.465	0.6	NaN	NaN	NaN	8.605	37.23	0.38	NaN	NaN	NaN
2.6	NaN	0.05	3.98	33.278	0.5	2.23	16.025	-0.22	NaN	NaN	NaN	3.79	NaN	1.09	3.275	31.675	0.87	2.925	35.363	1.09	NaN	NaN	NaN	8.625	37.455	0.49	NaN	NaN	NaN
2.62	NaN	-0.24	4.03	33.881	0.67	2.26	16.142	-0.27	NaN	NaN	NaN	3.825	NaN	0.53	3.3	31.79	1.08	2.95	36.238	0.62	NaN	NaN	NaN	8.635	37.586	0.88	NaN	NaN	NaN
2.64	NaN	0.02	4.08	34.345	0.73	2.28	16.22	-0.22	NaN	NaN	NaN	3.85	NaN	0.35	3.325	31.885	0.94	2.975	37.091	0.62	NaN	NaN	NaN	8.665	37.93	0.33	NaN	NaN	NaN
2.7	NaN	-0.05	4.13	34.824	0.5	2.31	16.334	-0.11	NaN	NaN	NaN	3.875	NaN	0.1	3.35	31.976	1.16	3	37.607	0.7	NaN	NaN	NaN	8.675	38.041	0.55	NaN	NaN	NaN
2.76	NaN	-0.06	4.18	35.299	0.57	2.33	16.408	-0.31	NaN	NaN	NaN	3.925	NaN	0.87	3.375	32.079	1.01	3.025	38.085	0.64	NaN	NaN	NaN	8.695	38.276	0.16	NaN	NaN	NaN
2.78	NaN	0.2	4.23	35.769	0.73	2.36	16.516	-0.05	NaN	NaN	NaN	3.95	NaN	1.33	3.4	32.188	1.21	3.05	38.45	0.7	NaN	NaN	NaN	8.765	38.994	0.06	NaN	NaN	NaN
2.8	NaN	0.64	4.28	36.22	0.74	2.41	16.691	-0.12	NaN	NaN	NaN	3.975	NaN	1.03	3.45	32.439	0.88	3.075	38.746	0.77	NaN	NaN	NaN	8.805	39.241	0.19	NaN	NaN	NaN
2.82	NaN	0.13	4.33	36.677	0.69	2.43	16.769	-0.14	NaN	NaN	NaN	3.99	NaN	0.98	3.475	32.564	0.94	3.1	39.008	0.8	NaN	NaN	NaN	8.815	39.281	0.02	NaN	NaN	NaN
2.84	NaN	0.59	4.38	37.147	0.64	2.46	16.887	0	NaN	NaN	NaN	4.025	NaN	0.86	3.5	32.693	1.21	3.125	39.241	0.77	NaN	NaN	NaN	8.845	39.4	0.59	NaN	NaN	NaN
2.86	NaN	0.25	4.43	37.646	0.67	2.48	16.966	0.27	NaN	NaN	NaN	4.05	NaN	1.1	3.525	32.823	0.79	3.15	39.443	0.85	NaN	NaN	NaN	8.865	39.479	0.51	NaN	NaN	NaN
2.88	NaN	0.48	4.48	38.223	0.27	2.51	17.082	-0.07	NaN	NaN	NaN	4.075	NaN	1.14	3.55	32.952	1.32	3.175	39.646	0.61	NaN	NaN	NaN	8.905	39.639	0.69	NaN	NaN	NaN
2.9	NaN	0.39	4.53	38.836	0.26	2.53	17.169	0.11	NaN	NaN	NaN	4.125	NaN	0.76	3.6	33.306	0.88	3.2	39.862	0.62	NaN	NaN	NaN	8.935	39.793	0.61	NaN	NaN	NaN
2.92	NaN	0.64	4.63	39.688	0.44	2.56	17.304	0.08	NaN	NaN	NaN	4.15	NaN	0.82	3.625	33.519	0.83	3.25	40.317	0.48	NaN	NaN	NaN	8.965	39.936	0.39	NaN	NaN	NaN
2.94	NaN	0.46	4.68	40.058	0.59	2.58	17.387	-0.31	NaN	NaN	NaN	4.175	NaN	1	3.65	33.691	0.87	3.275	40.531	0.96	NaN	NaN	NaN	8.975	39.978	0.57	NaN	NaN	NaN
2.96	NaN	0.49	4.73	40.414	0.6	2.61	17.509	0.1	NaN	NaN	NaN	4.19	NaN	1.32	3.675	33.847	1.01	3.3	40.744	0.84	NaN	NaN	NaN	9.025	40.187	0.54	NaN	NaN	NaN
2.98	NaN	-0.38	4.78	40.743	0.55	2.63	17.59	-0.05	NaN	NaN	NaN	4.225	NaN	1.1	3.7	34.03	1.16	3.325	40.949	0.85	NaN	NaN	NaN	9.055	40.303	0.52	NaN	NaN	NaN
3	NaN	1.11	4.83	41.053	0.56	2.66	17.716	0.13	NaN	NaN	NaN	4.25	NaN	0.83	3.75	34.501	1.23	3.425	41.683	0.75	NaN	NaN	NaN	9.065	40.34	0.57	NaN	NaN	NaN
3.02	NaN	0.6	4.88	41.346	0.37	2.68	17.803	-0.02	NaN	NaN	NaN	4.275	NaN	0.74	3.8	35.199	0.75	3.45	41.895	0.94	NaN	NaN	NaN	9.105	40.476	0.41	NaN	NaN	NaN
3.04	NaN	-0.24	4.93	41.568	0.81	2.71	17.934	0.06	NaN	NaN	NaN	4.29	NaN	0.71	3.825	35.769	0.87	3.5	42.387	0.87	NaN	NaN	NaN	9.125	40.539	0.49	NaN	NaN	NaN
3.06	NaN	0.56	4.98	41.761	0.62	2.73	18.021	-0.06	NaN	NaN	NaN	4.325	NaN	1.06	3.85	36.514	1.04	3.525	42.744	1.06	NaN	NaN	NaN	9.165	40.664	0.66	NaN	NaN	NaN
3.08	NaN	0.48	5.03	41.936	0.81	2.76	18.155	0	NaN	NaN	NaN	4.35	NaN	0.54	3.875	37.35	1.1	3.55	43.201	0.84	NaN	NaN	NaN	9.195	40.757	0.48	NaN	NaN	NaN
3.1	NaN	0.24	5.08	42.091	0.68	2.78	18.252	0.19	NaN	NaN	NaN	4.375	NaN	0.51	3.9	37.993	1.25	3.6	44.05	0.77	NaN	NaN	NaN	9.275	40.995	0.58	NaN	NaN	NaN
3.12	NaN	0.64	5.13	42.246	0.75	2.81	18.381	0.29	NaN	NaN	NaN	4.42	NaN	1.08	3.925	38.531	0.76	3.625	44.535	0.56	NaN	NaN	NaN	9.315	41.108	0.54	NaN	NaN	NaN
3.14	NaN	0.66	5.18	42.397	0.67	2.83	18.468	0.22	NaN	NaN	NaN	4.45	NaN	0.99	3.95	38.983	1.32	3.65	45.029	0.42	NaN	NaN	NaN	9.625	42.15	0.55	NaN	NaN	NaN
3.16	NaN	0.93	5.23	42.548	0.7	2.86	18.598	0.24	NaN	NaN	NaN	4.475	NaN	1.13	4.05	40.307	0.76	3.675	45.424	0.63	NaN	NaN	NaN	9.745	43.07	0.63	NaN	NaN	NaN
3.18	NaN	0.85	5.28	42.72	0.83	2.88	18.684	0.35	NaN	NaN	NaN	4.5	NaN	1.09	4.2	NaN	1.01	3.7	45.819	0.82	NaN	NaN	NaN	9.865	44.122	0.54	NaN	NaN	NaN
3.2	NaN	1.07	5.33	42.957	0.53	2.91	18.813	0.17	NaN	NaN	NaN	4.525	NaN	0.98	4.25	NaN	1.24	3.725	46.136	0.96	NaN	NaN	NaN	9.985	45.035	0.36	NaN	NaN	NaN
3.22	NaN	0.47	5.38	43.231	0.52	2.93	18.896	0.24	NaN	NaN	NaN	4.55	NaN	1.21	4.35	NaN	1.39	3.75	NaN	0.87	NaN	NaN	NaN	10.705	NaN	0.7	NaN	NaN	NaN
3.24	NaN	0.32	5.43	43.504	0.87	2.96	19.019	0.58	NaN	NaN	NaN	4.625	NaN	1.07	4.375	NaN	1.32	3.775	NaN	0.62	NaN	NaN	NaN	10.825	NaN	0.24	NaN	NaN	NaN
3.26	NaN	0.64	5.48	43.742	0.45	3.01	19.241	0.51	NaN	NaN	NaN	4.65	NaN	1.03	4.425	NaN	1.1	3.8	NaN	0.9	NaN	NaN	NaN	10.945	NaN	0.28	NaN	NaN	NaN
3.28	NaN	0.68	5.53	43.962	0.2	3.06	19.485	0.37	NaN	NaN	NaN	4.675	NaN	1.32	4.475	NaN	1.31	3.825	NaN	0.88	NaN	NaN	NaN	11.065	NaN	0.6	NaN	NaN	NaN
3.3	NaN	0.79	5.58	44.248	0.15	3.11	19.733	0.32	NaN	NaN	NaN	4.8	NaN	1.13	4.6	NaN	1.09	3.975	NaN	1.02	NaN	NaN	NaN	11.185	NaN	0.44	NaN	NaN	NaN
3.32	NaN	0.39	5.63	44.594	0.35	3.13	19.832	0.29	NaN	NaN	NaN	4.9	NaN	1.08	4.625	NaN	1.17	4	NaN	0.95	NaN	NaN	NaN	11.905	NaN	0.31	NaN	NaN	NaN
3.34	NaN	0.87	5.68	44.956	0.29	3.16	19.987	0.42	NaN	NaN	NaN	5	NaN	0.49	4.65	NaN	1.03	4.05	NaN	1.06	NaN	NaN	NaN	NaN	NaN	NaN	NaN	NaN	NaN
3.36	NaN	0.44	5.73	45.268	0.29	3.18	20.091	0.31	NaN	NaN	NaN	5.1	NaN	0.83	4.675	NaN	0.98	4.1	NaN	0.85	NaN	NaN	NaN	NaN	NaN	NaN	NaN	NaN	NaN
3.38	NaN	0.59	5.78	45.624	0.4	3.21	20.247	0.34	NaN	NaN	NaN	5.2	NaN	0.82	4.725	NaN	1.06	4.15	NaN	0.9	NaN	NaN	NaN	NaN	NaN	NaN	NaN	NaN	NaN
3.4	NaN	0.56	5.83	46.177	0.39	3.23	20.354	0.2	NaN	NaN	NaN	5.3	NaN	0.77	4.75	NaN	0.89	4.2	NaN	0.99	NaN	NaN	NaN	NaN	NaN	NaN	NaN	NaN	NaN
3.42	NaN	0.45	5.88	NaN	0.53	3.26	20.614	0.23	NaN	NaN	NaN	5.4	NaN	0.76	4.775	NaN	0.91	4.3	NaN	0.91	NaN	NaN	NaN	NaN	NaN	NaN	NaN	NaN	NaN
3.44	NaN	-0.13	5.93	NaN	0.52	3.28	20.814	0.06	NaN	NaN	NaN	5.5	NaN	0.45	4.8	NaN	1.14	4.35	NaN	0.79	NaN	NaN	NaN	NaN	NaN	NaN	NaN	NaN	NaN
3.46	NaN	0.1	5.98	NaN	0.56	3.31	21.113	0.39	NaN	NaN	NaN	5.6	NaN	0.28	4.825	NaN	0.94	4.39	NaN	0.83	NaN	NaN	NaN	NaN	NaN	NaN	NaN	NaN	NaN
3.48	NaN	0.19	6.03	NaN	0.68	3.33	21.315	0.3	NaN	NaN	NaN	5.7	NaN	0.56	4.875	NaN	0.88	4.45	NaN	0.82	NaN	NaN	NaN	NaN	NaN	NaN	NaN	NaN	NaN
3.5	NaN	0.34	6.08	NaN	0.55	3.36	21.632	0.33	NaN	NaN	NaN	6	NaN	0.63	4.9	NaN	0.95	4.5	NaN	0.78	NaN	NaN	NaN	NaN	NaN	NaN	NaN	NaN	NaN
3.52	NaN	-0.04	6.13	NaN	0.82	3.38	21.83	0.52	NaN	NaN	NaN	6.1	NaN	0.23	4.925	NaN	0.28	4.55	NaN	0.25	NaN	NaN	NaN	NaN	NaN	NaN	NaN	NaN	NaN
3.54	NaN	0.67	6.18	NaN	0.35	3.41	22.122	0.29	NaN	NaN	NaN	6.2	NaN	-0.12	4.975	NaN	0.8	4.6	NaN	0.66	NaN	NaN	NaN	NaN	NaN	NaN	NaN	NaN	NaN
3.56	NaN	0.24	6.23	NaN	0.66	3.43	22.322	0.25	NaN	NaN	NaN	8.1	NaN	1.06	5	NaN	0.73	4.8	NaN	0.49	NaN	NaN	NaN	NaN	NaN	NaN	NaN	NaN	NaN
3.58	NaN	0.76	6.28	NaN	0.81	3.46	22.68	0.16	NaN	NaN	NaN	8.5	NaN	0.42	5.025	NaN	0.85	4.85	NaN	0.45	NaN	NaN	NaN	NaN	NaN	NaN	NaN	NaN	NaN
3.6	NaN	0.83	6.33	NaN	0.72	3.48	22.918	0.19	NaN	NaN	NaN	8.6	NaN	0.63	5.05	NaN	0.97	5	NaN	0.42	NaN	NaN	NaN	NaN	NaN	NaN	NaN	NaN	NaN
3.62	NaN	0.54	6.38	NaN	0.87	3.51	23.213	0.34	NaN	NaN	NaN	8.7	NaN	0.88	5.075	NaN	0.66	5.05	NaN	0.36	NaN	NaN	NaN	NaN	NaN	NaN	NaN	NaN	NaN
3.64	NaN	0.81	6.43	NaN	0.57	3.53	23.393	0.01	NaN	NaN	NaN	8.9	NaN	0.86	5.1	NaN	0.89	5.15	NaN	0.73	NaN	NaN	NaN	NaN	NaN	NaN	NaN	NaN	NaN
3.66	NaN	0.88	6.48	NaN	0.5	3.58	23.817	0.12	NaN	NaN	NaN	9	NaN	-0.04	5.125	NaN	0.63	5.2	NaN	0.55	NaN	NaN	NaN	NaN	NaN	NaN	NaN	NaN	NaN
3.68	NaN	0.58	6.53	NaN	0.47	3.61	24.061	0.36	NaN	NaN	NaN	9.4	NaN	0.57	5.15	NaN	0.73	5.3	NaN	1.06	NaN	NaN	NaN	NaN	NaN	NaN	NaN	NaN	NaN
3.7	NaN	0.44	6.58	NaN	0.3	3.63	24.261	0.01	NaN	NaN	NaN	9.6	NaN	0.87	5.175	NaN	0.69	5.35	NaN	0.96	NaN	NaN	NaN	NaN	NaN	NaN	NaN	NaN	NaN
3.72	NaN	1.06	6.63	NaN	0.63	3.73	25.114	0.21	NaN	NaN	NaN	9.7	NaN	0.98	5.2	NaN	0.84	5.39	NaN	1.07	NaN	NaN	NaN	NaN	NaN	NaN	NaN	NaN	NaN
3.74	NaN	0.71	6.68	NaN	0.63	3.76	25.329	0.34	NaN	NaN	NaN	9.8	NaN	1.06	5.225	NaN	0.61	5.45	NaN	0.9	NaN	NaN	NaN	NaN	NaN	NaN	NaN	NaN	NaN
3.76	NaN	0.61	6.73	NaN	0.39	3.78	25.472	-0.16	NaN	NaN	NaN	11	NaN	0.85	5.275	NaN	0.7	5.5	NaN	1.04	NaN	NaN	NaN	NaN	NaN	NaN	NaN	NaN	NaN
3.78	NaN	0.99	6.78	NaN	0.4	3.81	25.683	0.27	NaN	NaN	NaN	11.2	NaN	0.54	5.325	NaN	0.54	5.55	NaN	1.09	NaN	NaN	NaN	NaN	NaN	NaN	NaN	NaN	NaN
3.8	NaN	0.94	6.83	NaN	0.33	3.83	25.819	0.13	NaN	NaN	NaN	11.5	NaN	0.02	5.35	NaN	1.11	5.6	NaN	1.05	NaN	NaN	NaN	NaN	NaN	NaN	NaN	NaN	NaN
3.82	NaN	0.87	6.88	NaN	0.41	3.86	26.024	0.18	NaN	NaN	NaN	11.6	NaN	1.14	5.375	NaN	0.72	5.65	NaN	0.9	NaN	NaN	NaN	NaN	NaN	NaN	NaN	NaN	NaN
3.84	NaN	0.67	6.93	NaN	0.45	3.88	26.167	0.06	NaN	NaN	NaN	11.7	NaN	0.8	5.4	NaN	0.93	5.7	NaN	1.15	NaN	NaN	NaN	NaN	NaN	NaN	NaN	NaN	NaN
3.86	NaN	0.98	6.98	NaN	0.35	3.91	26.373	0.22	NaN	NaN	NaN	11.8	NaN	0.57	5.425	NaN	1.16	5.75	NaN	1.13	NaN	NaN	NaN	NaN	NaN	NaN	NaN	NaN	NaN
3.88	NaN	0.84	7.03	NaN	0.43	3.93	26.508	-0.13	NaN	NaN	NaN	11.9	NaN	1.06	5.475	NaN	1.12	5.8	NaN	1.02	NaN	NaN	NaN	NaN	NaN	NaN	NaN	NaN	NaN
3.9	NaN	0.34	7.08	NaN	0.31	3.96	26.716	-0.09	NaN	NaN	NaN	12	NaN	0.41	5.5	NaN	1.02	5.85	NaN	0.99	NaN	NaN	NaN	NaN	NaN	NaN	NaN	NaN	NaN
3.92	NaN	0.97	7.13	NaN	0.6	3.98	26.839	-0.09	NaN	NaN	NaN	12.1	NaN	1.01	5.525	NaN	0.93	5.9	NaN	1	NaN	NaN	NaN	NaN	NaN	NaN	NaN	NaN	NaN
3.94	NaN	0.99	7.18	NaN	0.47	4.01	26.988	0.05	NaN	NaN	NaN	12.4	NaN	0.59	5.65	NaN	0.95	5.95	NaN	1.02	NaN	NaN	NaN	NaN	NaN	NaN	NaN	NaN	NaN
3.96	NaN	0.97	7.23	NaN	0.47	4.13	27.569	-0.04	NaN	NaN	NaN	12.5	NaN	1.1	5.95	NaN	1.06	6	NaN	0.83	NaN	NaN	NaN	NaN	NaN	NaN	NaN	NaN	NaN
3.98	NaN	0.77	7.28	NaN	0.04	4.18	27.8	0.03	NaN	NaN	NaN	12.6	NaN	0.19	6.05	NaN	0.92	6.05	NaN	0.79	NaN	NaN	NaN	NaN	NaN	NaN	NaN	NaN	NaN
4	NaN	0.02	7.33	NaN	0.52	4.23	28.032	0.07	NaN	NaN	NaN	12.7	NaN	0.67	6.1	NaN	0.92	6.1	NaN	1.03	NaN	NaN	NaN	NaN	NaN	NaN	NaN	NaN	NaN
4.02	NaN	0.87	7.38	NaN	0.19	4.28	28.259	0.06	NaN	NaN	NaN	12.8	NaN	0.47	6.15	NaN	1.17	6.2	NaN	0.92	NaN	NaN	NaN	NaN	NaN	NaN	NaN	NaN	NaN
4.04	NaN	0.37	7.43	NaN	0.16	4.33	28.484	-0.26	NaN	NaN	NaN	13	NaN	0.53	6.2	NaN	0.65	6.25	NaN	0.92	NaN	NaN	NaN	NaN	NaN	NaN	NaN	NaN	NaN
4.06	NaN	0.86	7.48	NaN	0.04	4.36	28.619	0.2	NaN	NaN	NaN	NaN	NaN	NaN	6.25	NaN	1.27	6.3	NaN	1.05	NaN	NaN	NaN	NaN	NaN	NaN	NaN	NaN	NaN
4.08	NaN	0.38	7.53	NaN	-0.08	4.38	28.709	-0.08	NaN	NaN	NaN	NaN	NaN	NaN	6.35	NaN	1.41	6.35	NaN	1.08	NaN	NaN	NaN	NaN	NaN	NaN	NaN	NaN	NaN
4.1	NaN	0.5	7.58	NaN	0.11	4.41	28.83	0.05	NaN	NaN	NaN	NaN	NaN	NaN	6.45	NaN	1.43	6.39	NaN	0.99	NaN	NaN	NaN	NaN	NaN	NaN	NaN	NaN	NaN
4.12	NaN	0.7	7.63	NaN	0.11	4.43	28.916	-0.03	NaN	NaN	NaN	NaN	NaN	NaN	6.95	NaN	1.07	6.5	NaN	1.05	NaN	NaN	NaN	NaN	NaN	NaN	NaN	NaN	NaN
4.14	NaN	0.28	7.68	NaN	0.02	4.46	29.045	0.06	NaN	NaN	NaN	NaN	NaN	NaN	7.05	NaN	1.08	6.65	NaN	1	NaN	NaN	NaN	NaN	NaN	NaN	NaN	NaN	NaN
4.16	NaN	0	7.73	NaN	0.05	4.48	29.145	0.14	NaN	NaN	NaN	NaN	NaN	NaN	7.15	NaN	1.17	6.7	NaN	1.01	NaN	NaN	NaN	NaN	NaN	NaN	NaN	NaN	NaN
4.18	NaN	0.08	7.78	NaN	0.09	4.51	29.299	0.17	NaN	NaN	NaN	NaN	NaN	NaN	7.7	NaN	0.68	6.75	NaN	0.82	NaN	NaN	NaN	NaN	NaN	NaN	NaN	NaN	NaN
4.2	NaN	-0.05	7.83	NaN	0.08	4.53	29.398	0.09	NaN	NaN	NaN	NaN	NaN	NaN	7.8	NaN	1.07	6.85	NaN	0.84	NaN	NaN	NaN	NaN	NaN	NaN	NaN	NaN	NaN
4.22	NaN	0.72	7.88	NaN	0.02	4.56	29.55	0.02	NaN	NaN	NaN	NaN	NaN	NaN	7.9	NaN	0.96	6.9	NaN	0.74	NaN	NaN	NaN	NaN	NaN	NaN	NaN	NaN	NaN
4.24	NaN	0.44	7.93	NaN	0.05	4.58	29.675	-0.05	NaN	NaN	NaN	NaN	NaN	NaN	8.1	NaN	0.9	7	NaN	0.69	NaN	NaN	NaN	NaN	NaN	NaN	NaN	NaN	NaN
4.26	NaN	0.46	7.98	NaN	0.08	4.61	29.869	-0.14	NaN	NaN	NaN	NaN	NaN	NaN	8.2	NaN	1.12	7.05	NaN	0.68	NaN	NaN	NaN	NaN	NaN	NaN	NaN	NaN	NaN
4.28	NaN	0.58	8.03	NaN	0.06	4.63	30.005	0.01	NaN	NaN	NaN	NaN	NaN	NaN	8.3	NaN	0.76	7.1	NaN	0.54	NaN	NaN	NaN	NaN	NaN	NaN	NaN	NaN	NaN
4.3	NaN	0.36	8.08	NaN	0.49	4.66	30.208	-0.03	NaN	NaN	NaN	NaN	NaN	NaN	8.35	NaN	0.89	7.15	NaN	0.87	NaN	NaN	NaN	NaN	NaN	NaN	NaN	NaN	NaN
4.32	NaN	0.2	8.13	NaN	0.49	4.68	30.344	-0.08	NaN	NaN	NaN	NaN	NaN	NaN	NaN	NaN	NaN	7.2	NaN	0.68	NaN	NaN	NaN	NaN	NaN	NaN	NaN	NaN	NaN
4.38	NaN	0.15	8.18	NaN	0.38	4.71	30.549	0.18	NaN	NaN	NaN	NaN	NaN	NaN	NaN	NaN	NaN	7.25	NaN	0.82	NaN	NaN	NaN	NaN	NaN	NaN	NaN	NaN	NaN
4.4	NaN	0.4	8.23	NaN	0.4	4.73	30.683	-0.07	NaN	NaN	NaN	NaN	NaN	NaN	NaN	NaN	NaN	7.3	NaN	0.61	NaN	NaN	NaN	NaN	NaN	NaN	NaN	NaN	NaN
4.42	NaN	0.47	8.28	NaN	0.28	4.76	30.856	0.13	NaN	NaN	NaN	NaN	NaN	NaN	NaN	NaN	NaN	7.39	NaN	0.8	NaN	NaN	NaN	NaN	NaN	NaN	NaN	NaN	NaN
4.44	NaN	0.27	8.33	NaN	0.04	4.78	30.971	-0.17	NaN	NaN	NaN	NaN	NaN	NaN	NaN	NaN	NaN	7.45	NaN	0.8	NaN	NaN	NaN	NaN	NaN	NaN	NaN	NaN	NaN
4.46	NaN	0.81	8.38	NaN	0.28	4.81	31.154	-0.03	NaN	NaN	NaN	NaN	NaN	NaN	NaN	NaN	NaN	7.5	NaN	1.05	NaN	NaN	NaN	NaN	NaN	NaN	NaN	NaN	NaN
4.48	NaN	0.65	8.43	NaN	0.11	4.83	31.281	-0.23	NaN	NaN	NaN	NaN	NaN	NaN	NaN	NaN	NaN	7.55	NaN	1.06	NaN	NaN	NaN	NaN	NaN	NaN	NaN	NaN	NaN
4.5	NaN	0.73	8.48	NaN	0.21	4.86	31.472	-0.07	NaN	NaN	NaN	NaN	NaN	NaN	NaN	NaN	NaN	7.6	NaN	1.02	NaN	NaN	NaN	NaN	NaN	NaN	NaN	NaN	NaN
4.52	NaN	0.75	8.58	NaN	0.2	4.88	31.585	-0.01	NaN	NaN	NaN	NaN	NaN	NaN	NaN	NaN	NaN	7.65	NaN	0.98	NaN	NaN	NaN	NaN	NaN	NaN	NaN	NaN	NaN
4.54	NaN	0.2	8.63	NaN	0.18	4.91	31.744	-0.3	NaN	NaN	NaN	NaN	NaN	NaN	NaN	NaN	NaN	7.7	NaN	1.05	NaN	NaN	NaN	NaN	NaN	NaN	NaN	NaN	NaN
4.56	NaN	0.69	8.68	NaN	0.37	4.93	31.835	0.03	NaN	NaN	NaN	NaN	NaN	NaN	NaN	NaN	NaN	7.75	NaN	0.83	NaN	NaN	NaN	NaN	NaN	NaN	NaN	NaN	NaN
4.58	NaN	0.56	8.73	NaN	0.52	4.96	31.962	0.01	NaN	NaN	NaN	NaN	NaN	NaN	NaN	NaN	NaN	7.8	NaN	0.8	NaN	NaN	NaN	NaN	NaN	NaN	NaN	NaN	NaN
4.6	NaN	0.91	8.78	NaN	0.42	5.01	32.173	-0.06	NaN	NaN	NaN	NaN	NaN	NaN	NaN	NaN	NaN	7.85	NaN	0.88	NaN	NaN	NaN	NaN	NaN	NaN	NaN	NaN	NaN
4.62	NaN	1.15	8.83	NaN	0.42	5.03	32.266	-0.04	NaN	NaN	NaN	NaN	NaN	NaN	NaN	NaN	NaN	7.9	NaN	0.62	NaN	NaN	NaN	NaN	NaN	NaN	NaN	NaN	NaN
4.64	NaN	0.48	8.88	NaN	-0.04	5.08	32.462	0.21	NaN	NaN	NaN	NaN	NaN	NaN	NaN	NaN	NaN	7.95	NaN	0.22	NaN	NaN	NaN	NaN	NaN	NaN	NaN	NaN	NaN
4.66	NaN	1.06	8.93	NaN	0.56	5.11	32.578	0.19	NaN	NaN	NaN	NaN	NaN	NaN	NaN	NaN	NaN	8	NaN	0.37	NaN	NaN	NaN	NaN	NaN	NaN	NaN	NaN	NaN
4.68	NaN	0.06	8.98	NaN	0.52	5.16	32.778	0.18	NaN	NaN	NaN	NaN	NaN	NaN	NaN	NaN	NaN	8.05	NaN	0.38	NaN	NaN	NaN	NaN	NaN	NaN	NaN	NaN	NaN
4.7	NaN	0.84	9.03	NaN	0.72	5.18	32.857	-0.06	NaN	NaN	NaN	NaN	NaN	NaN	NaN	NaN	NaN	8.1	NaN	0.38	NaN	NaN	NaN	NaN	NaN	NaN	NaN	NaN	NaN
4.72	NaN	0.75	9.08	NaN	0.51	5.21	32.977	0.05	NaN	NaN	NaN	NaN	NaN	NaN	NaN	NaN	NaN	8.2	NaN	0.31	NaN	NaN	NaN	NaN	NaN	NaN	NaN	NaN	NaN
4.74	NaN	1	9.13	NaN	0.54	5.23	33.081	0.57	NaN	NaN	NaN	NaN	NaN	NaN	NaN	NaN	NaN	8.25	NaN	0.44	NaN	NaN	NaN	NaN	NaN	NaN	NaN	NaN	NaN
4.76	NaN	0.97	9.18	NaN	0.46	5.26	33.251	-0.17	NaN	NaN	NaN	NaN	NaN	NaN	NaN	NaN	NaN	8.3	NaN	0.5	NaN	NaN	NaN	NaN	NaN	NaN	NaN	NaN	NaN
4.78	NaN	1.1	9.23	NaN	0.14	5.31	33.534	-0.27	NaN	NaN	NaN	NaN	NaN	NaN	NaN	NaN	NaN	8.35	NaN	0.42	NaN	NaN	NaN	NaN	NaN	NaN	NaN	NaN	NaN
4.8	NaN	0.94	9.28	NaN	0.36	5.33	33.625	-0.03	NaN	NaN	NaN	NaN	NaN	NaN	NaN	NaN	NaN	8.39	NaN	0.44	NaN	NaN	NaN	NaN	NaN	NaN	NaN	NaN	NaN
4.82	NaN	0.92	9.33	NaN	0.18	5.36	33.733	0.23	NaN	NaN	NaN	NaN	NaN	NaN	NaN	NaN	NaN	8.45	NaN	0.34	NaN	NaN	NaN	NaN	NaN	NaN	NaN	NaN	NaN
4.84	NaN	0.63	9.38	NaN	0.59	5.41	33.914	-0.31	NaN	NaN	NaN	NaN	NaN	NaN	NaN	NaN	NaN	8.5	NaN	0.31	NaN	NaN	NaN	NaN	NaN	NaN	NaN	NaN	NaN
4.86	NaN	0.2	9.43	NaN	0.46	5.43	33.999	0.57	NaN	NaN	NaN	NaN	NaN	NaN	NaN	NaN	NaN	8.55	NaN	0.32	NaN	NaN	NaN	NaN	NaN	NaN	NaN	NaN	NaN
4.88	NaN	0.38	9.48	NaN	0.67	5.46	34.135	-0.11	NaN	NaN	NaN	NaN	NaN	NaN	NaN	NaN	NaN	8.65	NaN	0.06	NaN	NaN	NaN	NaN	NaN	NaN	NaN	NaN	NaN
4.9	NaN	0.26	9.53	NaN	0.46	5.48	34.24	-0.1	NaN	NaN	NaN	NaN	NaN	NaN	NaN	NaN	NaN	8.7	NaN	0.14	NaN	NaN	NaN	NaN	NaN	NaN	NaN	NaN	NaN
4.92	NaN	0.3	9.58	NaN	0.5	5.51	34.397	-0.16	NaN	NaN	NaN	NaN	NaN	NaN	NaN	NaN	NaN	8.75	NaN	0.47	NaN	NaN	NaN	NaN	NaN	NaN	NaN	NaN	NaN
4.94	NaN	0.24	9.63	NaN	0.82	5.53	34.501	0.22	NaN	NaN	NaN	NaN	NaN	NaN	NaN	NaN	NaN	8.8	NaN	0.41	NaN	NaN	NaN	NaN	NaN	NaN	NaN	NaN	NaN
4.96	NaN	-0.12	9.68	NaN	0.64	5.56	34.659	-0.08	NaN	NaN	NaN	NaN	NaN	NaN	NaN	NaN	NaN	8.85	NaN	0.35	NaN	NaN	NaN	NaN	NaN	NaN	NaN	NaN	NaN
4.98	NaN	0.2	9.73	NaN	0.37	5.58	34.781	-0.12	NaN	NaN	NaN	NaN	NaN	NaN	NaN	NaN	NaN	8.9	NaN	0.63	NaN	NaN	NaN	NaN	NaN	NaN	NaN	NaN	NaN
5	NaN	0.25	9.78	NaN	0.78	5.61	34.964	0.01	NaN	NaN	NaN	NaN	NaN	NaN	NaN	NaN	NaN	8.95	NaN	0.73	NaN	NaN	NaN	NaN	NaN	NaN	NaN	NaN	NaN
5.02	NaN	-0.01	9.83	NaN	0.67	5.63	35.083	-0.23	NaN	NaN	NaN	NaN	NaN	NaN	NaN	NaN	NaN	9	NaN	0.66	NaN	NaN	NaN	NaN	NaN	NaN	NaN	NaN	NaN
5.04	NaN	0.56	9.88	NaN	0.88	5.66	35.253	0.13	NaN	NaN	NaN	NaN	NaN	NaN	NaN	NaN	NaN	9.05	NaN	0.64	NaN	NaN	NaN	NaN	NaN	NaN	NaN	NaN	NaN
5.06	NaN	0.09	9.93	NaN	0.34	5.68	35.365	-0.05	NaN	NaN	NaN	NaN	NaN	NaN	NaN	NaN	NaN	9.1	NaN	0.29	NaN	NaN	NaN	NaN	NaN	NaN	NaN	NaN	NaN
5.08	NaN	0.31	9.98	NaN	0.52	5.71	35.511	0.22	NaN	NaN	NaN	NaN	NaN	NaN	NaN	NaN	NaN	9.15	NaN	0.55	NaN	NaN	NaN	NaN	NaN	NaN	NaN	NaN	NaN
5.1	NaN	0.22	10.03	NaN	0.42	5.73	35.605	-0.31	NaN	NaN	NaN	NaN	NaN	NaN	NaN	NaN	NaN	9.2	NaN	0.3	NaN	NaN	NaN	NaN	NaN	NaN	NaN	NaN	NaN
5.12	NaN	0.12	10.08	NaN	0.28	5.76	35.746	0.27	NaN	NaN	NaN	NaN	NaN	NaN	NaN	NaN	NaN	9.25	NaN	0.35	NaN	NaN	NaN	NaN	NaN	NaN	NaN	NaN	NaN
5.14	NaN	0.16	10.13	NaN	0.34	5.78	35.841	0.39	NaN	NaN	NaN	NaN	NaN	NaN	NaN	NaN	NaN	9.3	NaN	0.47	NaN	NaN	NaN	NaN	NaN	NaN	NaN	NaN	NaN
5.16	NaN	0.69	10.18	NaN	0.43	5.81	35.976	-0.09	NaN	NaN	NaN	NaN	NaN	NaN	NaN	NaN	NaN	9.35	NaN	0.71	NaN	NaN	NaN	NaN	NaN	NaN	NaN	NaN	NaN
5.18	NaN	1	10.23	NaN	0.56	5.83	36.061	0.03	NaN	NaN	NaN	NaN	NaN	NaN	NaN	NaN	NaN	9.39	NaN	0.8	NaN	NaN	NaN	NaN	NaN	NaN	NaN	NaN	NaN
5.2	NaN	0	10.28	NaN	0.64	5.86	36.19	-0.12	NaN	NaN	NaN	NaN	NaN	NaN	NaN	NaN	NaN	9.45	NaN	0.88	NaN	NaN	NaN	NaN	NaN	NaN	NaN	NaN	NaN
5.22	NaN	0.22	10.33	NaN	0.47	5.88	36.276	0.27	NaN	NaN	NaN	NaN	NaN	NaN	NaN	NaN	NaN	9.5	NaN	0.84	NaN	NaN	NaN	NaN	NaN	NaN	NaN	NaN	NaN
5.24	NaN	-0.09	10.38	NaN	0.63	5.91	36.463	0.33	NaN	NaN	NaN	NaN	NaN	NaN	NaN	NaN	NaN	9.6	NaN	0.96	NaN	NaN	NaN	NaN	NaN	NaN	NaN	NaN	NaN
5.26	NaN	0.14	10.43	NaN	0.67	5.93	36.648	0.43	NaN	NaN	NaN	NaN	NaN	NaN	NaN	NaN	NaN	9.65	NaN	0.29	NaN	NaN	NaN	NaN	NaN	NaN	NaN	NaN	NaN
5.28	NaN	0.13	10.48	NaN	0.35	5.96	36.924	-0.06	NaN	NaN	NaN	NaN	NaN	NaN	NaN	NaN	NaN	9.7	NaN	0.7	NaN	NaN	NaN	NaN	NaN	NaN	NaN	NaN	NaN
5.3	NaN	-0.14	10.53	NaN	0.76	5.98	37.075	0.15	NaN	NaN	NaN	NaN	NaN	NaN	NaN	NaN	NaN	9.75	NaN	0.58	NaN	NaN	NaN	NaN	NaN	NaN	NaN	NaN	NaN
5.34	NaN	0.13	10.58	NaN	0.49	6.01	37.289	-0.35	NaN	NaN	NaN	NaN	NaN	NaN	NaN	NaN	NaN	9.8	NaN	0.11	NaN	NaN	NaN	NaN	NaN	NaN	NaN	NaN	NaN
5.36	NaN	0.03	10.63	NaN	0.77	6.03	37.432	0.09	NaN	NaN	NaN	NaN	NaN	NaN	NaN	NaN	NaN	9.85	NaN	0.61	NaN	NaN	NaN	NaN	NaN	NaN	NaN	NaN	NaN
5.38	NaN	0.13	10.68	NaN	0.7	6.06	37.684	-0.09	NaN	NaN	NaN	NaN	NaN	NaN	NaN	NaN	NaN	9.9	NaN	0.69	NaN	NaN	NaN	NaN	NaN	NaN	NaN	NaN	NaN
5.4	NaN	-0.1	10.73	NaN	0.71	6.08	37.853	-0.18	NaN	NaN	NaN	NaN	NaN	NaN	NaN	NaN	NaN	9.95	NaN	0.66	NaN	NaN	NaN	NaN	NaN	NaN	NaN	NaN	NaN
5.42	NaN	-0.33	10.78	NaN	0.68	6.11	38.121	-0.32	NaN	NaN	NaN	NaN	NaN	NaN	NaN	NaN	NaN	10.05	NaN	0.91	NaN	NaN	NaN	NaN	NaN	NaN	NaN	NaN	NaN
5.44	NaN	0.03	10.83	NaN	0.86	6.13	38.31	-0.31	NaN	NaN	NaN	NaN	NaN	NaN	NaN	NaN	NaN	10.1	NaN	0.94	NaN	NaN	NaN	NaN	NaN	NaN	NaN	NaN	NaN
5.46	NaN	-0.22	10.88	NaN	0.71	6.16	38.538	-0.68	NaN	NaN	NaN	NaN	NaN	NaN	NaN	NaN	NaN	10.2	NaN	0.23	NaN	NaN	NaN	NaN	NaN	NaN	NaN	NaN	NaN
5.48	NaN	-0.08	10.93	NaN	0.52	6.21	38.835	-0.28	NaN	NaN	NaN	NaN	NaN	NaN	NaN	NaN	NaN	10.25	NaN	0.09	NaN	NaN	NaN	NaN	NaN	NaN	NaN	NaN	NaN
5.5	NaN	-0.15	10.98	NaN	0.65	6.23	38.953	-0.02	NaN	NaN	NaN	NaN	NaN	NaN	NaN	NaN	NaN	10.35	NaN	0.53	NaN	NaN	NaN	NaN	NaN	NaN	NaN	NaN	NaN
5.52	NaN	-0.03	11.03	NaN	0.85	6.26	39.13	0.11	NaN	NaN	NaN	NaN	NaN	NaN	NaN	NaN	NaN	10.4	NaN	0.37	NaN	NaN	NaN	NaN	NaN	NaN	NaN	NaN	NaN
5.54	NaN	-0.03	11.08	NaN	0.71	6.28	39.244	-0.09	NaN	NaN	NaN	NaN	NaN	NaN	NaN	NaN	NaN	10.45	NaN	0.46	NaN	NaN	NaN	NaN	NaN	NaN	NaN	NaN	NaN
5.56	NaN	-0.16	11.13	NaN	0.66	6.31	39.398	-0.1	NaN	NaN	NaN	NaN	NaN	NaN	NaN	NaN	NaN	10.95	NaN	0.18	NaN	NaN	NaN	NaN	NaN	NaN	NaN	NaN	NaN
5.58	NaN	-0.06	11.18	NaN	0.49	6.33	39.5	-0.26	NaN	NaN	NaN	NaN	NaN	NaN	NaN	NaN	NaN	11	NaN	0.31	NaN	NaN	NaN	NaN	NaN	NaN	NaN	NaN	NaN
5.6	NaN	-0.54	11.23	NaN	0.6	6.36	39.649	0.13	NaN	NaN	NaN	NaN	NaN	NaN	NaN	NaN	NaN	NaN	NaN	NaN	NaN	NaN	NaN	NaN	NaN	NaN	NaN	NaN	NaN
5.62	NaN	-0.06	11.28	NaN	0.47	6.41	39.907	-0.12	NaN	NaN	NaN	NaN	NaN	NaN	NaN	NaN	NaN	NaN	NaN	NaN	NaN	NaN	NaN	NaN	NaN	NaN	NaN	NaN	NaN
5.64	NaN	-0.13	11.33	NaN	0.78	6.46	40.177	0.19	NaN	NaN	NaN	NaN	NaN	NaN	NaN	NaN	NaN	NaN	NaN	NaN	NaN	NaN	NaN	NaN	NaN	NaN	NaN	NaN	NaN
5.66	NaN	-0.89	11.38	NaN	0.35	6.48	40.285	-0.25	NaN	NaN	NaN	NaN	NaN	NaN	NaN	NaN	NaN	NaN	NaN	NaN	NaN	NaN	NaN	NaN	NaN	NaN	NaN	NaN	NaN
5.68	NaN	-0.19	11.43	NaN	0.47	6.51	40.44	-0.15	NaN	NaN	NaN	NaN	NaN	NaN	NaN	NaN	NaN	NaN	NaN	NaN	NaN	NaN	NaN	NaN	NaN	NaN	NaN	NaN	NaN
5.7	NaN	-0.61	11.48	NaN	0.53	6.53	40.541	0.12	NaN	NaN	NaN	NaN	NaN	NaN	NaN	NaN	NaN	NaN	NaN	NaN	NaN	NaN	NaN	NaN	NaN	NaN	NaN	NaN	NaN
5.72	NaN	-0.21	11.53	NaN	0.51	6.56	40.692	-0.15	NaN	NaN	NaN	NaN	NaN	NaN	NaN	NaN	NaN	NaN	NaN	NaN	NaN	NaN	NaN	NaN	NaN	NaN	NaN	NaN	NaN
5.74	NaN	-0.11	11.58	NaN	0.32	6.58	40.793	-0.4	NaN	NaN	NaN	NaN	NaN	NaN	NaN	NaN	NaN	NaN	NaN	NaN	NaN	NaN	NaN	NaN	NaN	NaN	NaN	NaN	NaN
NaN	NaN	NaN	11.63	NaN	0.32	6.61	40.938	-0.17	NaN	NaN	NaN	NaN	NaN	NaN	NaN	NaN	NaN	NaN	NaN	NaN	NaN	NaN	NaN	NaN	NaN	NaN	NaN	NaN	NaN
NaN	NaN	NaN	11.68	NaN	0.28	6.63	41.028	-0.21	NaN	NaN	NaN	NaN	NaN	NaN	NaN	NaN	NaN	NaN	NaN	NaN	NaN	NaN	NaN	NaN	NaN	NaN	NaN	NaN	NaN
NaN	NaN	NaN	11.73	NaN	0.41	6.66	41.162	0.17	NaN	NaN	NaN	NaN	NaN	NaN	NaN	NaN	NaN	NaN	NaN	NaN	NaN	NaN	NaN	NaN	NaN	NaN	NaN	NaN	NaN
NaN	NaN	NaN	11.78	NaN	0.31	6.68	41.252	0.48	NaN	NaN	NaN	NaN	NaN	NaN	NaN	NaN	NaN	NaN	NaN	NaN	NaN	NaN	NaN	NaN	NaN	NaN	NaN	NaN	NaN
NaN	NaN	NaN	11.83	NaN	0.17	6.71	41.386	-0.21	NaN	NaN	NaN	NaN	NaN	NaN	NaN	NaN	NaN	NaN	NaN	NaN	NaN	NaN	NaN	NaN	NaN	NaN	NaN	NaN	NaN
NaN	NaN	NaN	11.88	NaN	0.31	6.73	41.458	-0.4	NaN	NaN	NaN	NaN	NaN	NaN	NaN	NaN	NaN	NaN	NaN	NaN	NaN	NaN	NaN	NaN	NaN	NaN	NaN	NaN	NaN
NaN	NaN	NaN	11.93	NaN	0.38	6.76	41.566	0.37	NaN	NaN	NaN	NaN	NaN	NaN	NaN	NaN	NaN	NaN	NaN	NaN	NaN	NaN	NaN	NaN	NaN	NaN	NaN	NaN	NaN
NaN	NaN	NaN	11.98	NaN	0.74	6.78	41.638	0.07	NaN	NaN	NaN	NaN	NaN	NaN	NaN	NaN	NaN	NaN	NaN	NaN	NaN	NaN	NaN	NaN	NaN	NaN	NaN	NaN	NaN
NaN	NaN	NaN	12.03	NaN	0.61	6.81	41.747	-0.58	NaN	NaN	NaN	NaN	NaN	NaN	NaN	NaN	NaN	NaN	NaN	NaN	NaN	NaN	NaN	NaN	NaN	NaN	NaN	NaN	NaN
NaN	NaN	NaN	12.08	NaN	0.84	6.83	41.828	0.1	NaN	NaN	NaN	NaN	NaN	NaN	NaN	NaN	NaN	NaN	NaN	NaN	NaN	NaN	NaN	NaN	NaN	NaN	NaN	NaN	NaN
NaN	NaN	NaN	12.13	NaN	0.56	6.86	41.961	-0.14	NaN	NaN	NaN	NaN	NaN	NaN	NaN	NaN	NaN	NaN	NaN	NaN	NaN	NaN	NaN	NaN	NaN	NaN	NaN	NaN	NaN
NaN	NaN	NaN	12.18	NaN	0.82	6.88	42.05	-0.08	NaN	NaN	NaN	NaN	NaN	NaN	NaN	NaN	NaN	NaN	NaN	NaN	NaN	NaN	NaN	NaN	NaN	NaN	NaN	NaN	NaN
NaN	NaN	NaN	12.23	NaN	0.78	6.91	42.183	-0.25	NaN	NaN	NaN	NaN	NaN	NaN	NaN	NaN	NaN	NaN	NaN	NaN	NaN	NaN	NaN	NaN	NaN	NaN	NaN	NaN	NaN
NaN	NaN	NaN	12.28	NaN	0.71	6.93	42.272	-0.2	NaN	NaN	NaN	NaN	NaN	NaN	NaN	NaN	NaN	NaN	NaN	NaN	NaN	NaN	NaN	NaN	NaN	NaN	NaN	NaN	NaN
NaN	NaN	NaN	12.33	NaN	0.62	6.96	42.405	0.39	NaN	NaN	NaN	NaN	NaN	NaN	NaN	NaN	NaN	NaN	NaN	NaN	NaN	NaN	NaN	NaN	NaN	NaN	NaN	NaN	NaN
NaN	NaN	NaN	12.38	NaN	0.76	6.98	42.497	0.36	NaN	NaN	NaN	NaN	NaN	NaN	NaN	NaN	NaN	NaN	NaN	NaN	NaN	NaN	NaN	NaN	NaN	NaN	NaN	NaN	NaN
NaN	NaN	NaN	12.43	NaN	0.58	7.01	42.636	0.17	NaN	NaN	NaN	NaN	NaN	NaN	NaN	NaN	NaN	NaN	NaN	NaN	NaN	NaN	NaN	NaN	NaN	NaN	NaN	NaN	NaN
NaN	NaN	NaN	12.48	NaN	0.44	7.03	42.728	-0.24	NaN	NaN	NaN	NaN	NaN	NaN	NaN	NaN	NaN	NaN	NaN	NaN	NaN	NaN	NaN	NaN	NaN	NaN	NaN	NaN	NaN
NaN	NaN	NaN	12.53	NaN	0.74	7.06	42.89	-0.06	NaN	NaN	NaN	NaN	NaN	NaN	NaN	NaN	NaN	NaN	NaN	NaN	NaN	NaN	NaN	NaN	NaN	NaN	NaN	NaN	NaN
NaN	NaN	NaN	12.58	NaN	0.57	7.08	43.012	0.06	NaN	NaN	NaN	NaN	NaN	NaN	NaN	NaN	NaN	NaN	NaN	NaN	NaN	NaN	NaN	NaN	NaN	NaN	NaN	NaN	NaN
NaN	NaN	NaN	12.63	NaN	0.67	7.11	43.195	-0.21	NaN	NaN	NaN	NaN	NaN	NaN	NaN	NaN	NaN	NaN	NaN	NaN	NaN	NaN	NaN	NaN	NaN	NaN	NaN	NaN	NaN
NaN	NaN	NaN	12.68	NaN	0.73	7.13	43.307	-0.3	NaN	NaN	NaN	NaN	NaN	NaN	NaN	NaN	NaN	NaN	NaN	NaN	NaN	NaN	NaN	NaN	NaN	NaN	NaN	NaN	NaN
NaN	NaN	NaN	12.73	NaN	0.59	7.16	43.462	0.07	NaN	NaN	NaN	NaN	NaN	NaN	NaN	NaN	NaN	NaN	NaN	NaN	NaN	NaN	NaN	NaN	NaN	NaN	NaN	NaN	NaN
NaN	NaN	NaN	12.78	NaN	0.36	7.18	43.565	-0.09	NaN	NaN	NaN	NaN	NaN	NaN	NaN	NaN	NaN	NaN	NaN	NaN	NaN	NaN	NaN	NaN	NaN	NaN	NaN	NaN	NaN
NaN	NaN	NaN	12.83	NaN	0.59	7.21	43.715	0.33	NaN	NaN	NaN	NaN	NaN	NaN	NaN	NaN	NaN	NaN	NaN	NaN	NaN	NaN	NaN	NaN	NaN	NaN	NaN	NaN	NaN
NaN	NaN	NaN	12.88	NaN	0.69	7.23	43.804	-0.14	NaN	NaN	NaN	NaN	NaN	NaN	NaN	NaN	NaN	NaN	NaN	NaN	NaN	NaN	NaN	NaN	NaN	NaN	NaN	NaN	NaN
NaN	NaN	NaN	12.93	NaN	0.54	7.26	43.937	0.25	NaN	NaN	NaN	NaN	NaN	NaN	NaN	NaN	NaN	NaN	NaN	NaN	NaN	NaN	NaN	NaN	NaN	NaN	NaN	NaN	NaN
NaN	NaN	NaN	12.98	NaN	0.6	7.28	44.026	0	NaN	NaN	NaN	NaN	NaN	NaN	NaN	NaN	NaN	NaN	NaN	NaN	NaN	NaN	NaN	NaN	NaN	NaN	NaN	NaN	NaN
NaN	NaN	NaN	13.03	NaN	0.33	7.31	44.165	0.05	NaN	NaN	NaN	NaN	NaN	NaN	NaN	NaN	NaN	NaN	NaN	NaN	NaN	NaN	NaN	NaN	NaN	NaN	NaN	NaN	NaN
NaN	NaN	NaN	13.08	NaN	0.58	7.33	44.258	0.27	NaN	NaN	NaN	NaN	NaN	NaN	NaN	NaN	NaN	NaN	NaN	NaN	NaN	NaN	NaN	NaN	NaN	NaN	NaN	NaN	NaN
NaN	NaN	NaN	13.13	NaN	0.28	7.36	44.43	-0.15	NaN	NaN	NaN	NaN	NaN	NaN	NaN	NaN	NaN	NaN	NaN	NaN	NaN	NaN	NaN	NaN	NaN	NaN	NaN	NaN	NaN
NaN	NaN	NaN	13.18	NaN	0.36	7.38	44.551	0.05	NaN	NaN	NaN	NaN	NaN	NaN	NaN	NaN	NaN	NaN	NaN	NaN	NaN	NaN	NaN	NaN	NaN	NaN	NaN	NaN	NaN
NaN	NaN	NaN	13.23	NaN	0.42	7.41	44.731	-0.46	NaN	NaN	NaN	NaN	NaN	NaN	NaN	NaN	NaN	NaN	NaN	NaN	NaN	NaN	NaN	NaN	NaN	NaN	NaN	NaN	NaN
NaN	NaN	NaN	13.28	NaN	0.33	7.43	44.853	0.04	NaN	NaN	NaN	NaN	NaN	NaN	NaN	NaN	NaN	NaN	NaN	NaN	NaN	NaN	NaN	NaN	NaN	NaN	NaN	NaN	NaN
NaN	NaN	NaN	13.33	NaN	0.48	7.46	45.089	0.17	NaN	NaN	NaN	NaN	NaN	NaN	NaN	NaN	NaN	NaN	NaN	NaN	NaN	NaN	NaN	NaN	NaN	NaN	NaN	NaN	NaN
NaN	NaN	NaN	13.38	NaN	0.48	7.48	45.222	-0.18	NaN	NaN	NaN	NaN	NaN	NaN	NaN	NaN	NaN	NaN	NaN	NaN	NaN	NaN	NaN	NaN	NaN	NaN	NaN	NaN	NaN
NaN	NaN	NaN	13.43	NaN	0.47	7.51	45.353	0.19	NaN	NaN	NaN	NaN	NaN	NaN	NaN	NaN	NaN	NaN	NaN	NaN	NaN	NaN	NaN	NaN	NaN	NaN	NaN	NaN	NaN
NaN	NaN	NaN	13.48	NaN	0.54	7.53	45.429	-0.12	NaN	NaN	NaN	NaN	NaN	NaN	NaN	NaN	NaN	NaN	NaN	NaN	NaN	NaN	NaN	NaN	NaN	NaN	NaN	NaN	NaN
NaN	NaN	NaN	13.53	NaN	0.65	7.56	45.553	-0.01	NaN	NaN	NaN	NaN	NaN	NaN	NaN	NaN	NaN	NaN	NaN	NaN	NaN	NaN	NaN	NaN	NaN	NaN	NaN	NaN	NaN
NaN	NaN	NaN	13.58	NaN	0.54	7.58	45.641	0.03	NaN	NaN	NaN	NaN	NaN	NaN	NaN	NaN	NaN	NaN	NaN	NaN	NaN	NaN	NaN	NaN	NaN	NaN	NaN	NaN	NaN
NaN	NaN	NaN	13.63	NaN	0.67	7.61	45.774	0.14	NaN	NaN	NaN	NaN	NaN	NaN	NaN	NaN	NaN	NaN	NaN	NaN	NaN	NaN	NaN	NaN	NaN	NaN	NaN	NaN	NaN
NaN	NaN	NaN	13.68	NaN	0.4	7.63	45.872	0.05	NaN	NaN	NaN	NaN	NaN	NaN	NaN	NaN	NaN	NaN	NaN	NaN	NaN	NaN	NaN	NaN	NaN	NaN	NaN	NaN	NaN
NaN	NaN	NaN	13.73	NaN	0.69	7.66	46.014	0.04	NaN	NaN	NaN	NaN	NaN	NaN	NaN	NaN	NaN	NaN	NaN	NaN	NaN	NaN	NaN	NaN	NaN	NaN	NaN	NaN	NaN
NaN	NaN	NaN	13.78	NaN	0.46	7.68	46.108	0.1	NaN	NaN	NaN	NaN	NaN	NaN	NaN	NaN	NaN	NaN	NaN	NaN	NaN	NaN	NaN	NaN	NaN	NaN	NaN	NaN	NaN
NaN	NaN	NaN	13.83	NaN	0.36	7.76	NaN	0.08	NaN	NaN	NaN	NaN	NaN	NaN	NaN	NaN	NaN	NaN	NaN	NaN	NaN	NaN	NaN	NaN	NaN	NaN	NaN	NaN	NaN
NaN	NaN	NaN	13.88	NaN	0.51	7.78	NaN	0.11	NaN	NaN	NaN	NaN	NaN	NaN	NaN	NaN	NaN	NaN	NaN	NaN	NaN	NaN	NaN	NaN	NaN	NaN	NaN	NaN	NaN
NaN	NaN	NaN	13.93	NaN	0.5	7.83	NaN	-0.15	NaN	NaN	NaN	NaN	NaN	NaN	NaN	NaN	NaN	NaN	NaN	NaN	NaN	NaN	NaN	NaN	NaN	NaN	NaN	NaN	NaN
NaN	NaN	NaN	13.98	NaN	0.49	7.86	NaN	0.14	NaN	NaN	NaN	NaN	NaN	NaN	NaN	NaN	NaN	NaN	NaN	NaN	NaN	NaN	NaN	NaN	NaN	NaN	NaN	NaN	NaN
NaN	NaN	NaN	14.03	NaN	0.36	7.88	NaN	0.08	NaN	NaN	NaN	NaN	NaN	NaN	NaN	NaN	NaN	NaN	NaN	NaN	NaN	NaN	NaN	NaN	NaN	NaN	NaN	NaN	NaN
NaN	NaN	NaN	14.08	NaN	0.49	7.91	NaN	-0.59	NaN	NaN	NaN	NaN	NaN	NaN	NaN	NaN	NaN	NaN	NaN	NaN	NaN	NaN	NaN	NaN	NaN	NaN	NaN	NaN	NaN
NaN	NaN	NaN	14.13	NaN	0.57	7.93	NaN	0.14	NaN	NaN	NaN	NaN	NaN	NaN	NaN	NaN	NaN	NaN	NaN	NaN	NaN	NaN	NaN	NaN	NaN	NaN	NaN	NaN	NaN
NaN	NaN	NaN	14.18	NaN	0.62	7.96	NaN	0.18	NaN	NaN	NaN	NaN	NaN	NaN	NaN	NaN	NaN	NaN	NaN	NaN	NaN	NaN	NaN	NaN	NaN	NaN	NaN	NaN	NaN
NaN	NaN	NaN	14.23	NaN	0.32	7.98	NaN	0.18	NaN	NaN	NaN	NaN	NaN	NaN	NaN	NaN	NaN	NaN	NaN	NaN	NaN	NaN	NaN	NaN	NaN	NaN	NaN	NaN	NaN
NaN	NaN	NaN	14.28	NaN	0.45	8.01	NaN	0.38	NaN	NaN	NaN	NaN	NaN	NaN	NaN	NaN	NaN	NaN	NaN	NaN	NaN	NaN	NaN	NaN	NaN	NaN	NaN	NaN	NaN
NaN	NaN	NaN	14.33	NaN	0.45	8.06	NaN	0.33	NaN	NaN	NaN	NaN	NaN	NaN	NaN	NaN	NaN	NaN	NaN	NaN	NaN	NaN	NaN	NaN	NaN	NaN	NaN	NaN	NaN
NaN	NaN	NaN	14.38	NaN	0.36	8.08	NaN	0.17	NaN	NaN	NaN	NaN	NaN	NaN	NaN	NaN	NaN	NaN	NaN	NaN	NaN	NaN	NaN	NaN	NaN	NaN	NaN	NaN	NaN
NaN	NaN	NaN	14.43	NaN	0.16	8.11	NaN	-0.11	NaN	NaN	NaN	NaN	NaN	NaN	NaN	NaN	NaN	NaN	NaN	NaN	NaN	NaN	NaN	NaN	NaN	NaN	NaN	NaN	NaN
NaN	NaN	NaN	14.48	NaN	-0.05	8.13	NaN	0.7	NaN	NaN	NaN	NaN	NaN	NaN	NaN	NaN	NaN	NaN	NaN	NaN	NaN	NaN	NaN	NaN	NaN	NaN	NaN	NaN	NaN
NaN	NaN	NaN	14.53	NaN	0.41	8.16	NaN	0.29	NaN	NaN	NaN	NaN	NaN	NaN	NaN	NaN	NaN	NaN	NaN	NaN	NaN	NaN	NaN	NaN	NaN	NaN	NaN	NaN	NaN
NaN	NaN	NaN	14.58	NaN	0.44	8.18	NaN	0.02	NaN	NaN	NaN	NaN	NaN	NaN	NaN	NaN	NaN	NaN	NaN	NaN	NaN	NaN	NaN	NaN	NaN	NaN	NaN	NaN	NaN
NaN	NaN	NaN	14.63	NaN	0.43	8.21	NaN	0.3	NaN	NaN	NaN	NaN	NaN	NaN	NaN	NaN	NaN	NaN	NaN	NaN	NaN	NaN	NaN	NaN	NaN	NaN	NaN	NaN	NaN
NaN	NaN	NaN	14.68	NaN	0.42	8.23	NaN	0.31	NaN	NaN	NaN	NaN	NaN	NaN	NaN	NaN	NaN	NaN	NaN	NaN	NaN	NaN	NaN	NaN	NaN	NaN	NaN	NaN	NaN
NaN	NaN	NaN	14.73	NaN	0.21	8.26	NaN	-0.19	NaN	NaN	NaN	NaN	NaN	NaN	NaN	NaN	NaN	NaN	NaN	NaN	NaN	NaN	NaN	NaN	NaN	NaN	NaN	NaN	NaN
NaN	NaN	NaN	14.78	NaN	0.18	8.28	NaN	0.06	NaN	NaN	NaN	NaN	NaN	NaN	NaN	NaN	NaN	NaN	NaN	NaN	NaN	NaN	NaN	NaN	NaN	NaN	NaN	NaN	NaN
NaN	NaN	NaN	14.83	NaN	0.25	8.31	NaN	0.09	NaN	NaN	NaN	NaN	NaN	NaN	NaN	NaN	NaN	NaN	NaN	NaN	NaN	NaN	NaN	NaN	NaN	NaN	NaN	NaN	NaN
NaN	NaN	NaN	14.88	NaN	0.4	8.33	NaN	-0.5	NaN	NaN	NaN	NaN	NaN	NaN	NaN	NaN	NaN	NaN	NaN	NaN	NaN	NaN	NaN	NaN	NaN	NaN	NaN	NaN	NaN
NaN	NaN	NaN	14.93	NaN	0.35	8.36	NaN	-0.02	NaN	NaN	NaN	NaN	NaN	NaN	NaN	NaN	NaN	NaN	NaN	NaN	NaN	NaN	NaN	NaN	NaN	NaN	NaN	NaN	NaN
NaN	NaN	NaN	14.98	NaN	0.45	8.38	NaN	-0.12	NaN	NaN	NaN	NaN	NaN	NaN	NaN	NaN	NaN	NaN	NaN	NaN	NaN	NaN	NaN	NaN	NaN	NaN	NaN	NaN	NaN
NaN	NaN	NaN	15.03	NaN	0.17	8.41	NaN	0.04	NaN	NaN	NaN	NaN	NaN	NaN	NaN	NaN	NaN	NaN	NaN	NaN	NaN	NaN	NaN	NaN	NaN	NaN	NaN	NaN	NaN
NaN	NaN	NaN	15.08	NaN	0.12	8.43	NaN	0.17	NaN	NaN	NaN	NaN	NaN	NaN	NaN	NaN	NaN	NaN	NaN	NaN	NaN	NaN	NaN	NaN	NaN	NaN	NaN	NaN	NaN
NaN	NaN	NaN	15.13	NaN	-0.07	8.46	NaN	-0.23	NaN	NaN	NaN	NaN	NaN	NaN	NaN	NaN	NaN	NaN	NaN	NaN	NaN	NaN	NaN	NaN	NaN	NaN	NaN	NaN	NaN
NaN	NaN	NaN	15.18	NaN	-0.05	8.48	NaN	-0.22	NaN	NaN	NaN	NaN	NaN	NaN	NaN	NaN	NaN	NaN	NaN	NaN	NaN	NaN	NaN	NaN	NaN	NaN	NaN	NaN	NaN
NaN	NaN	NaN	15.23	NaN	-0.08	8.51	NaN	-0.01	NaN	NaN	NaN	NaN	NaN	NaN	NaN	NaN	NaN	NaN	NaN	NaN	NaN	NaN	NaN	NaN	NaN	NaN	NaN	NaN	NaN
NaN	NaN	NaN	15.28	NaN	0.46	8.53	NaN	0.21	NaN	NaN	NaN	NaN	NaN	NaN	NaN	NaN	NaN	NaN	NaN	NaN	NaN	NaN	NaN	NaN	NaN	NaN	NaN	NaN	NaN
NaN	NaN	NaN	15.33	NaN	0.4	8.56	NaN	0.04	NaN	NaN	NaN	NaN	NaN	NaN	NaN	NaN	NaN	NaN	NaN	NaN	NaN	NaN	NaN	NaN	NaN	NaN	NaN	NaN	NaN
NaN	NaN	NaN	15.38	NaN	0.28	8.58	NaN	-0.42	NaN	NaN	NaN	NaN	NaN	NaN	NaN	NaN	NaN	NaN	NaN	NaN	NaN	NaN	NaN	NaN	NaN	NaN	NaN	NaN	NaN
NaN	NaN	NaN	15.43	NaN	0.26	8.61	NaN	0.12	NaN	NaN	NaN	NaN	NaN	NaN	NaN	NaN	NaN	NaN	NaN	NaN	NaN	NaN	NaN	NaN	NaN	NaN	NaN	NaN	NaN
NaN	NaN	NaN	15.48	NaN	0.31	8.63	NaN	-0.19	NaN	NaN	NaN	NaN	NaN	NaN	NaN	NaN	NaN	NaN	NaN	NaN	NaN	NaN	NaN	NaN	NaN	NaN	NaN	NaN	NaN
NaN	NaN	NaN	15.53	NaN	0.21	8.66	NaN	-0.06	NaN	NaN	NaN	NaN	NaN	NaN	NaN	NaN	NaN	NaN	NaN	NaN	NaN	NaN	NaN	NaN	NaN	NaN	NaN	NaN	NaN
NaN	NaN	NaN	15.58	NaN	0.53	8.68	NaN	0.02	NaN	NaN	NaN	NaN	NaN	NaN	NaN	NaN	NaN	NaN	NaN	NaN	NaN	NaN	NaN	NaN	NaN	NaN	NaN	NaN	NaN
NaN	NaN	NaN	15.63	NaN	0.12	8.71	NaN	0.2	NaN	NaN	NaN	NaN	NaN	NaN	NaN	NaN	NaN	NaN	NaN	NaN	NaN	NaN	NaN	NaN	NaN	NaN	NaN	NaN	NaN
NaN	NaN	NaN	15.68	NaN	0.22	8.73	NaN	-0.26	NaN	NaN	NaN	NaN	NaN	NaN	NaN	NaN	NaN	NaN	NaN	NaN	NaN	NaN	NaN	NaN	NaN	NaN	NaN	NaN	NaN
NaN	NaN	NaN	15.73	NaN	0.31	8.76	NaN	-0.2	NaN	NaN	NaN	NaN	NaN	NaN	NaN	NaN	NaN	NaN	NaN	NaN	NaN	NaN	NaN	NaN	NaN	NaN	NaN	NaN	NaN
NaN	NaN	NaN	15.78	NaN	0.36	8.78	NaN	0.22	NaN	NaN	NaN	NaN	NaN	NaN	NaN	NaN	NaN	NaN	NaN	NaN	NaN	NaN	NaN	NaN	NaN	NaN	NaN	NaN	NaN
NaN	NaN	NaN	15.83	NaN	0.48	8.81	NaN	-0.12	NaN	NaN	NaN	NaN	NaN	NaN	NaN	NaN	NaN	NaN	NaN	NaN	NaN	NaN	NaN	NaN	NaN	NaN	NaN	NaN	NaN
NaN	NaN	NaN	15.88	NaN	0.4	8.83	NaN	-0.29	NaN	NaN	NaN	NaN	NaN	NaN	NaN	NaN	NaN	NaN	NaN	NaN	NaN	NaN	NaN	NaN	NaN	NaN	NaN	NaN	NaN
NaN	NaN	NaN	15.93	NaN	0.25	8.86	NaN	0.22	NaN	NaN	NaN	NaN	NaN	NaN	NaN	NaN	NaN	NaN	NaN	NaN	NaN	NaN	NaN	NaN	NaN	NaN	NaN	NaN	NaN
NaN	NaN	NaN	15.98	NaN	0.13	8.88	NaN	-0.14	NaN	NaN	NaN	NaN	NaN	NaN	NaN	NaN	NaN	NaN	NaN	NaN	NaN	NaN	NaN	NaN	NaN	NaN	NaN	NaN	NaN
NaN	NaN	NaN	16.03	NaN	0.22	8.91	NaN	0.08	NaN	NaN	NaN	NaN	NaN	NaN	NaN	NaN	NaN	NaN	NaN	NaN	NaN	NaN	NaN	NaN	NaN	NaN	NaN	NaN	NaN
NaN	NaN	NaN	16.08	NaN	0.34	8.93	NaN	0.3	NaN	NaN	NaN	NaN	NaN	NaN	NaN	NaN	NaN	NaN	NaN	NaN	NaN	NaN	NaN	NaN	NaN	NaN	NaN	NaN	NaN
NaN	NaN	NaN	16.13	NaN	0.06	8.96	NaN	0.2	NaN	NaN	NaN	NaN	NaN	NaN	NaN	NaN	NaN	NaN	NaN	NaN	NaN	NaN	NaN	NaN	NaN	NaN	NaN	NaN	NaN
NaN	NaN	NaN	16.18	NaN	0.47	8.98	NaN	-0.01	NaN	NaN	NaN	NaN	NaN	NaN	NaN	NaN	NaN	NaN	NaN	NaN	NaN	NaN	NaN	NaN	NaN	NaN	NaN	NaN	NaN
NaN	NaN	NaN	NaN	NaN	NaN	9.01	NaN	0.11	NaN	NaN	NaN	NaN	NaN	NaN	NaN	NaN	NaN	NaN	NaN	NaN	NaN	NaN	NaN	NaN	NaN	NaN	NaN	NaN	NaN
NaN	NaN	NaN	NaN	NaN	NaN	9.03	NaN	0.15	NaN	NaN	NaN	NaN	NaN	NaN	NaN	NaN	NaN	NaN	NaN	NaN	NaN	NaN	NaN	NaN	NaN	NaN	NaN	NaN	NaN
NaN	NaN	NaN	NaN	NaN	NaN	9.06	NaN	0.28	NaN	NaN	NaN	NaN	NaN	NaN	NaN	NaN	NaN	NaN	NaN	NaN	NaN	NaN	NaN	NaN	NaN	NaN	NaN	NaN	NaN
NaN	NaN	NaN	NaN	NaN	NaN	9.08	NaN	-0.04	NaN	NaN	NaN	NaN	NaN	NaN	NaN	NaN	NaN	NaN	NaN	NaN	NaN	NaN	NaN	NaN	NaN	NaN	NaN	NaN	NaN
NaN	NaN	NaN	NaN	NaN	NaN	9.11	NaN	-0.32	NaN	NaN	NaN	NaN	NaN	NaN	NaN	NaN	NaN	NaN	NaN	NaN	NaN	NaN	NaN	NaN	NaN	NaN	NaN	NaN	NaN
NaN	NaN	NaN	NaN	NaN	NaN	9.13	NaN	0.1	NaN	NaN	NaN	NaN	NaN	NaN	NaN	NaN	NaN	NaN	NaN	NaN	NaN	NaN	NaN	NaN	NaN	NaN	NaN	NaN	NaN
NaN	NaN	NaN	NaN	NaN	NaN	9.16	NaN	0.12	NaN	NaN	NaN	NaN	NaN	NaN	NaN	NaN	NaN	NaN	NaN	NaN	NaN	NaN	NaN	NaN	NaN	NaN	NaN	NaN	NaN
NaN	NaN	NaN	NaN	NaN	NaN	9.18	NaN	0.23	NaN	NaN	NaN	NaN	NaN	NaN	NaN	NaN	NaN	NaN	NaN	NaN	NaN	NaN	NaN	NaN	NaN	NaN	NaN	NaN	NaN
NaN	NaN	NaN	NaN	NaN	NaN	9.21	NaN	0.12	NaN	NaN	NaN	NaN	NaN	NaN	NaN	NaN	NaN	NaN	NaN	NaN	NaN	NaN	NaN	NaN	NaN	NaN	NaN	NaN	NaN
NaN	NaN	NaN	NaN	NaN	NaN	9.23	NaN	-0.03	NaN	NaN	NaN	NaN	NaN	NaN	NaN	NaN	NaN	NaN	NaN	NaN	NaN	NaN	NaN	NaN	NaN	NaN	NaN	NaN	NaN
NaN	NaN	NaN	NaN	NaN	NaN	9.26	NaN	0.39	NaN	NaN	NaN	NaN	NaN	NaN	NaN	NaN	NaN	NaN	NaN	NaN	NaN	NaN	NaN	NaN	NaN	NaN	NaN	NaN	NaN
NaN	NaN	NaN	NaN	NaN	NaN	9.28	NaN	-0.19	NaN	NaN	NaN	NaN	NaN	NaN	NaN	NaN	NaN	NaN	NaN	NaN	NaN	NaN	NaN	NaN	NaN	NaN	NaN	NaN	NaN
NaN	NaN	NaN	NaN	NaN	NaN	9.31	NaN	0.29	NaN	NaN	NaN	NaN	NaN	NaN	NaN	NaN	NaN	NaN	NaN	NaN	NaN	NaN	NaN	NaN	NaN	NaN	NaN	NaN	NaN
NaN	NaN	NaN	NaN	NaN	NaN	9.33	NaN	0.03	NaN	NaN	NaN	NaN	NaN	NaN	NaN	NaN	NaN	NaN	NaN	NaN	NaN	NaN	NaN	NaN	NaN	NaN	NaN	NaN	NaN
NaN	NaN	NaN	NaN	NaN	NaN	9.36	NaN	-0.25	NaN	NaN	NaN	NaN	NaN	NaN	NaN	NaN	NaN	NaN	NaN	NaN	NaN	NaN	NaN	NaN	NaN	NaN	NaN	NaN	NaN
NaN	NaN	NaN	NaN	NaN	NaN	9.38	NaN	0.15	NaN	NaN	NaN	NaN	NaN	NaN	NaN	NaN	NaN	NaN	NaN	NaN	NaN	NaN	NaN	NaN	NaN	NaN	NaN	NaN	NaN
NaN	NaN	NaN	NaN	NaN	NaN	9.41	NaN	0.16	NaN	NaN	NaN	NaN	NaN	NaN	NaN	NaN	NaN	NaN	NaN	NaN	NaN	NaN	NaN	NaN	NaN	NaN	NaN	NaN	NaN
NaN	NaN	NaN	NaN	NaN	NaN	9.43	NaN	-0.33	NaN	NaN	NaN	NaN	NaN	NaN	NaN	NaN	NaN	NaN	NaN	NaN	NaN	NaN	NaN	NaN	NaN	NaN	NaN	NaN	NaN
NaN	NaN	NaN	NaN	NaN	NaN	9.46	NaN	0.01	NaN	NaN	NaN	NaN	NaN	NaN	NaN	NaN	NaN	NaN	NaN	NaN	NaN	NaN	NaN	NaN	NaN	NaN	NaN	NaN	NaN
NaN	NaN	NaN	NaN	NaN	NaN	9.48	NaN	-0.07	NaN	NaN	NaN	NaN	NaN	NaN	NaN	NaN	NaN	NaN	NaN	NaN	NaN	NaN	NaN	NaN	NaN	NaN	NaN	NaN	NaN
NaN	NaN	NaN	NaN	NaN	NaN	9.51	NaN	0.25	NaN	NaN	NaN	NaN	NaN	NaN	NaN	NaN	NaN	NaN	NaN	NaN	NaN	NaN	NaN	NaN	NaN	NaN	NaN	NaN	NaN
NaN	NaN	NaN	NaN	NaN	NaN	9.53	NaN	0.05	NaN	NaN	NaN	NaN	NaN	NaN	NaN	NaN	NaN	NaN	NaN	NaN	NaN	NaN	NaN	NaN	NaN	NaN	NaN	NaN	NaN
NaN	NaN	NaN	NaN	NaN	NaN	9.56	NaN	-0.35	NaN	NaN	NaN	NaN	NaN	NaN	NaN	NaN	NaN	NaN	NaN	NaN	NaN	NaN	NaN	NaN	NaN	NaN	NaN	NaN	NaN
