# Supplementary material for: Deglacial carbon cycle changes observed in a compilation of 117 benthic δ 13 C time series (20–6 ka)
Source: Copernicus journal article supplement (doi:10.5194/cp-2018-25), 2018-03-15
Supplement: Supplementary file 16 [file LDNA_xyz.xls]

## Sheet: LDNA_xyz
	Latitude	Longitude	Depth (m)
EW9209-1JPC	5.91	-44.2	4056
EN066-26	3.09	-20.02	4745
EN066-32	2.47	-19.73	4998
EN066-36	4.31	-20.21	4095
GeoB1101	1.66	-10.98	4588
GIK16402	14.42	-20.54	4202
KNR110-55	4.95	-42.89	4556
KNR110-58	4.79	-43.04	4341
ODP928	5.46	-43.75	4012
GIK13521	3.02	-22.03	4504
