# Supplementary material for: Deglacial carbon cycle changes observed in a compilation of 117 benthic δ 13 C time series (20–6 ka)
Source: Copernicus journal article supplement (doi:10.5194/cp-2018-25), 2018-03-15
Supplement: Supplementary file 17 [file UDNA_xyz.xls]

## Sheet: UDNA_xyz
	Latitude	Longitude	Depth (m)
GeoB7920-2	20.75	-18.58	2278
GeoB9508-5	14.5	-17.95	2384
GeoB9526	12.44	-18.06	3223
GIK17049-6	55.26	-26.73	3331
GIK17051	56.16	-31.99	2295
GIK23415-9	53.18	-19.15	2472
KF13	37.58	-31.84	2690
MD95-2040	40.58	-9.86	2465
MD99-2334	37.8	-10.17	3146
NA87-22	55.48	-14.68	2161
ODP658C	20.75	-18.58	2274
ODP980	55.49	-14.7	2168
SU90-03	40.05	-32	2475
V29-202	61	-21	2658
EN066-16	5.45	-21.14	3152
EN066-21	4.23	-21.63	3995
EN066-38	4.92	-20.5	2931
EN066-44	5.26	-21.71	3428
GeoB4216	30.63	-12.4	2324
GIK12328-5	21.15	-18.57	2778
GIK12347-2	15.83	-17.86	2576
GIK12379-3	23.14	-17.75	2136
GIK12392-1	25.17	-16.85	2573
GIK15612-2	44.36	-26.54	3050
GIK15669	34.89	-7.82	2022
GIK15672	34.86	-8.13	2460
GIK17055-1	48.22	-27.06	2558
GIK23414-9	53.54	-20.29	2196
GIK23416-4	51.57	-20	3616
GIK23417-1	50.67	-19.43	3850
GIK23418-8	52.55	-20.33	2841
IODP-U1308	49.88	-24.24	3900
KNR110-50	4.87	-43.21	3995
KNR110-66	4.56	-43.38	3547
KNR110-71	4.36	-43.7	3164
KNR110-75	4.34	-43.41	3063
KNR110-82	4.34	-43.49	2816
KNR110-91	4.76	-43.31	3810
MD95-2039	40.58	-10.35	3381
SU90-39	52.5	-22	3955
V22-197	14.17	-18.58	3167
V23-81	54.25	-16.83	2393
V25-59	1.37	-33.48	3824
V30-49	18.43	-21.08	3093
CH73-139	54.63	-16.35	2209
CHN82-24	43.47	-30.66	3070
GIK16415	9.57	-19.11	3841
GIK17050	4.81	3.4	2861
HM52-43	68.495	0.8183	2802
