# Supplementary material for: Deglacial carbon cycle changes observed in a compilation of 117 benthic δ 13 C time series (20–6 ka)
Source: Copernicus journal article supplement (doi:10.5194/cp-2018-25), 2018-03-15
Supplement: Supplementary file 18 [file regional_d13c_stacks.xls]

## Sheet: regional_d13c_stacks
	ina	ina 95% half-width	udna	udna 95% half-width	ldna	ldna 95% half-width	isa	isa 95% half-width	dsa	dsa 95% half-width	ii	ii 95% half-width	ip	ip 95% half-width	di	di 95% half-width	dp	dp 95% half-width
6	1.0586	0.23033	0.92328	0.13929	0.74706	0.26416	0.96144	0.45691	0.41667	0.40215	0.16422	0.98406	0.30869	0.72547	0.14787	0.50129	0.17292	0.29284
7	1.0436	0.23683	0.89329	0.1562	0.7301	0.25899	0.90102	0.42731	0.43742	0.37028	0.18177	0.74105	0.27208	0.72877	0.019793	0.43806	0.15787	0.29372
8	1.0158	0.23714	0.89075	0.15764	0.64781	0.27278	0.84664	0.42446	0.46225	0.37651	0.16747	0.57542	0.28324	0.76308	0.11783	0.47303	0.15173	0.30991
9	0.93576	0.27135	0.84634	0.15725	0.55691	0.31772	0.78161	0.41289	0.39858	0.45745	0.25351	0.6696	0.22038	0.75195	0.064296	0.41568	0.15061	0.35743
10	0.89104	0.27088	0.80901	0.15306	0.52011	0.28144	0.74622	0.4715	0.42464	0.36147	0.095813	0.52147	0.1939	0.73219	-0.016464	0.43605	0.092778	0.29805
11	0.87691	0.28778	0.76268	0.15461	0.53031	0.34452	0.74161	0.43359	0.40631	0.37222	0.14245	0.64384	0.18221	0.8908	-0.081602	0.46859	0.08363	0.2864
12	0.9159	0.26535	0.70235	0.14838	0.50718	0.32911	0.66397	0.41504	0.32465	0.34273	0.19073	0.53998	0.21387	0.81049	-0.23827	0.46496	0.048486	0.34522
13	0.87478	0.28331	0.63682	0.15218	0.41937	0.30298	0.58527	0.45274	0.17166	0.47903	0.11357	0.52934	0.16299	0.85089	-0.0077836	0.56528	-0.025168	0.31639
14	0.83545	0.27785	0.57658	0.16849	0.37982	0.30465	0.516	0.34792	0.12203	0.47408	0.13221	0.59733	0.17119	0.92447	-0.16456	0.55376	-0.057784	0.30209
15	0.88807	0.28207	0.43763	0.18889	0.3429	0.39163	0.50831	0.36737	0.023104	0.50431	0.15609	0.48985	0.12907	0.78452	-0.14741	0.88644	-0.08956	0.32954
16	0.9067	0.29694	0.332	0.19059	0.29198	0.34353	0.53685	0.3741	-0.12221	0.50158	0.020778	0.5248	0.12789	0.75893	-0.45849	0.53656	-0.079745	0.33845
17	0.98839	0.30394	0.36862	0.18849	0.1772	0.26526	0.632	0.4448	-0.26519	0.4137	0.049747	0.50092	0.032732	0.6278	-0.38251	0.55859	-0.1245	0.38798
18	1.2429	0.25858	0.40187	0.19694	0.069435	0.32389	0.6102	0.41573	-0.38259	0.46692	-0.023085	0.5019	0.0082053	0.50195	-0.42498	0.49824	-0.16646	0.36465
19	1.2261	0.29733	0.44636	0.18863	0.06048	0.2975	0.58735	0.39381	-0.4023	0.48137	-0.002307	0.47628	-0.053582	0.56364	-0.50174	0.4686	-0.16373	0.33187
20	1.2362	0.32151	0.43915	0.1818	0.037282	0.30369	0.58792	0.41319	-0.38412	0.46962	0.012247	0.45022	-0.016003	0.63866	-0.4635	0.63351	-0.16049	0.36214
