# Supplementary material for: Deglacial carbon cycle changes observed in a compilation of 117 benthic δ 13 C time series (20–6 ka)
Source: Copernicus journal article supplement (doi:10.5194/cp-2018-25), 2018-03-15
Supplement: Supplementary file 19 [file volume_weighted_d13c_stacks.xls]

## Sheet: Sheet1
	AIP Intermediate	AIPinter 95% CI half-width	AP Intermediate	APinter 95% CI half-width	AIP Deep	AIPdeep 95% CI half-width	AP Deep	APdeep 95% CI half-width	AIP Gradient	AP Gradient	Global mean d13C	Global mean d13C 95% CI half-width
6	0.48464	0.22112	0.55241	0.1086	0.28274	0.099353	0.31106	0.059542	0.2019	0.24135	0.37468	0.11407
7	0.45586	0.21072	0.51383	0.1106	0.25065	0.097985	0.29913	0.059643	0.20521	0.2147	0.3441	0.11075
8	0.44662	0.21405	0.50566	0.11486	0.26458	0.10474	0.2954	0.062477	0.18204	0.21026	0.34748	0.11325
9	0.40737	0.21437	0.43991	0.11311	0.24088	0.11583	0.27796	0.072412	0.16649	0.16195	0.3167	0.11522
10	0.3543	0.20525	0.40897	0.11032	0.19109	0.098264	0.23467	0.059833	0.16321	0.1743	0.26541	0.1071
11	0.35375	0.24827	0.39843	0.13266	0.16807	0.096685	0.2205	0.057847	0.18567	0.17793	0.25262	0.12429
12	0.37012	0.22581	0.40806	0.12139	0.10442	0.11149	0.17638	0.068731	0.2657	0.23167	0.22542	0.12082
13	0.31094	0.23702	0.35269	0.12793	0.07498	0.11047	0.092361	0.065074	0.23596	0.26033	0.18243	0.12484
14	0.30192	0.25514	0.33781	0.13822	0.016049	0.10492	0.053977	0.062623	0.28587	0.28384	0.14623	0.12971
15	0.28837	0.21595	0.31635	0.11709	-0.025324	0.12896	0.00031418	0.068282	0.31369	0.31603	0.11753	0.12183
16	0.27126	0.21077	0.32424	0.11471	-0.10144	0.1149	-0.026461	0.06871	0.3727	0.3507	0.068282	0.11465
17	0.25155	0.17875	0.29424	0.096011	-0.13026	0.12608	-0.07729	0.078042	0.38182	0.37153	0.043612	0.10695
18	0.2516	0.14649	0.3097	0.077336	-0.17524	0.11947	-0.12279	0.073253	0.42684	0.43249	0.019139	0.093233
19	0.21626	0.16172	0.26248	0.087025	-0.18511	0.11145	-0.11862	0.067721	0.40137	0.38111	-0.002333	0.094205
20	0.24017	0.18051	0.28838	0.097495	-0.17575	0.12338	-0.11533	0.073369	0.41592	0.4037	0.013653	0.10525
